# Supplementary material for: Recyclable iodine-catalyzed radical selenylative annulation of 2-alkynyl biaryls with diselenides in water: a green approach to selanyl polycyclic aromatic hydrocarbons and polycyclic heteroaromatics
Source: Royal Society of Chemistry journal article supplement (doi:10.1039/d2gc02256g), 2022-01-01
Supplement: d2gc02256g1.pdf [file d2gc02256g1.pdf]

## Supporting information

### Recyclable iodine-catalyzed radical selenylative annulation of 2-alkynyl biaryls with diselenides in water: a green approach to selenyl polycyclic aromatic hydrocarbons and polycyclic heteroaromatics

Nilanjana Mukherjee, Appanapalli N. V. Satyanarayana, Priti Singh, Mudit Dixit and Tanmay Chatterjee\*

Department of Chemistry, Birla Institute of Technology and Science, Pilani (BITS Pilani),  
Hyderabad Campus, Jawahar Nagar, Hyderabad 500078, Telangana, India

Email: [tanmay@hyderabad.bits-pilani.ac.in](mailto:tanmay@hyderabad.bits-pilani.ac.in)

#### Table of Contents

|                                                                                                |     |
|------------------------------------------------------------------------------------------------|-----|
| 1. General reagent information .....                                                           | S3  |
| 1.1. General analytical information.....                                                       | S3  |
| 1.2. General computational information.....                                                    | S3  |
| 2. Synthesis of 2-alkynyl biaryls (1a-1o) and diaryl diselenides (2b-2g). ....                 | S4  |
| 3. General experimental procedure for the synthesis of products.....                           | S5  |
| 3.1. Gram-scale synthesis of phenyl(10-phenylphenanthren-9-yl)selenane (3aa) .....             | S5  |
| 4. Experimental procedure for the synthesis of 5. ....                                         | S6  |
| 4.1. Experimental procedure of Suzuki coupling reaction of 3ab and 3ca.....                    | S6  |
| 5. X-ray crystal structures of 3ba, 3ea and 3la .....                                          | S7  |
| 5.1. Table-S1. Selected crystal data for compounds 3ba, 3ea and 3la .....                      | S9  |
| 6. Table S2. Calculation of EcoScale score for the synthesis of 3aa.....                       | S10 |
| 7. <i>In situ</i> detection of phenylselenenyl iodide, PhSeI by LC-MS.....                     | S11 |
| 8. Calculation of the bond dissociation energies (BDE) for PhSe-X (X = Cl, Br, and I).....     | S11 |
| 8.1. Table S3. The bond dissociation energies (kcal/mol) of the PhSe-X bond (X = Cl, Br, I)... | S12 |
| 9. <i>In situ</i> detection of (2,2-diphenylvinyl)(phenyl)selenane by LC-MS.....               | S12 |

|                                                                                                                                     |            |
|-------------------------------------------------------------------------------------------------------------------------------------|------------|
| <b>10. Enery profile diagram for the initial step for the polar pathway .....</b>                                                   | <b>S13</b> |
| <b>11. Analytical data of all synthesized products (3aa - 3ah, 3ba - 3oa and 5, 6, 7) .....</b>                                     | <b>S13</b> |
| <b>12. References .....</b>                                                                                                         | <b>S21</b> |
| <b>13. NMR Spectra (<sup>1</sup>H, <sup>13</sup>C, <sup>19</sup>F and <sup>77</sup>Se NMR) of all products (3, 5, 6 and 7).....</b> | <b>S23</b> |
| <b>14. Table S4. Cartesian coordinates for various intermediates and transition states.....</b>                                     | <b>S97</b> |

## 1. General reagent information

All reagents and solvents were purchased from Sigma-Aldrich, TCI, Finar and other local chemical companies. Flash column chromatography was performed using silica gel (100-200 mesh)

### 1.1. General analytical information

The starting materials such as 2-(phenylethynyl)-1,1'-biaryls and products such as 9-selanyl phenanthrenes and polycyclic heteroaromatics were characterized by  $^1\text{H}$ ,  $^{13}\text{C}$ ,  $^{77}\text{Se}$  and  $^{19}\text{F}$  NMR spectra which were recorded on a Bruker 400 MHz instrument (400 MHz for  $^1\text{H}$  NMR, 100 MHz for  $^{13}\text{C}$  NMR, 76 MHz for  $^{77}\text{Se}$  NMR and 377 MHz for  $^{19}\text{F}$  NMR). Copies of  $^1\text{H}$ ,  $^{13}\text{C}$ ,  $^{77}\text{Se}$  and  $^{19}\text{F}$  NMR spectra can be found at the end of the Supporting Information.  $^1\text{H}$  NMR experiments are reported in units, parts per million (ppm), and were measured relative to residual chloroform (7.26 ppm) in the deuterated solvent.  $^{13}\text{C}$  NMR spectra are reported in ppm relative to deuteriochloroform (77.00 ppm) and all were obtained with  $^1\text{H}$  decoupling. Coupling constants were reported in Hz. Reactions were monitored by thin layer chromatography (TLC) and  $^1\text{H}$  NMR of the crude reaction mixture using 1,3,5-trimethoxybenzene as the internal standard. Mass spectral data were obtained on a high resolution mass spectrometer, Agilent MassHunter Qualitative Analysis B.06.00 and also in LCMS-8040 (Shimadzu). Melting points of unknown compounds were recorded on a KRUSS Optronic M3000 apparatus. Single Crystal X-ray data were recorded on Rigaku Oxford Diffraction (XtalLab).

### 1.2. General computational information

All the Density Functional Theory (DFT) calculations were performed using Gaussian 09<sup>1</sup> package with M06-2X exchange-correlation functional<sup>2</sup> along with LANL2DZ basis set<sup>3</sup> Vibrational frequency calculations were performed to confirm local minima and transition states. To incorporate the entropic effects, the thermochemistry was computed at room temperature (T=298.15 K) and standard atmospheric pressure (P=1 atm). Solvent effects were incorporated using an implicit solvation scheme with water as the implicit solvent using the self-consistent reaction field within the conducting polarizable continuum model (CPCM).<sup>4</sup>

## 2. Synthesis of 2-alkynyl biaryls (1a-1o) and diaryl diselenides (2b-2g).

All starting materials (1a,<sup>5</sup> 1b,<sup>5</sup> 1c,<sup>5</sup> 1d,<sup>5</sup> 1e,<sup>5</sup> 1f,<sup>5</sup> 1g,<sup>5</sup> 1h,<sup>5</sup> 1i,<sup>5</sup> 1j,<sup>5</sup> 1l,<sup>5</sup> 1m,<sup>5</sup> 1n,<sup>5</sup> 1o,<sup>5</sup> 2b,<sup>6</sup> 2c,<sup>6</sup> 2d,<sup>6</sup> 2e,<sup>6</sup> 2f,<sup>6</sup> 2g<sup>6</sup>) which are as shown below were synthesized by following a literature protocol and characterized by <sup>1</sup>H and <sup>13</sup>C NMR.<sup>5,6</sup>

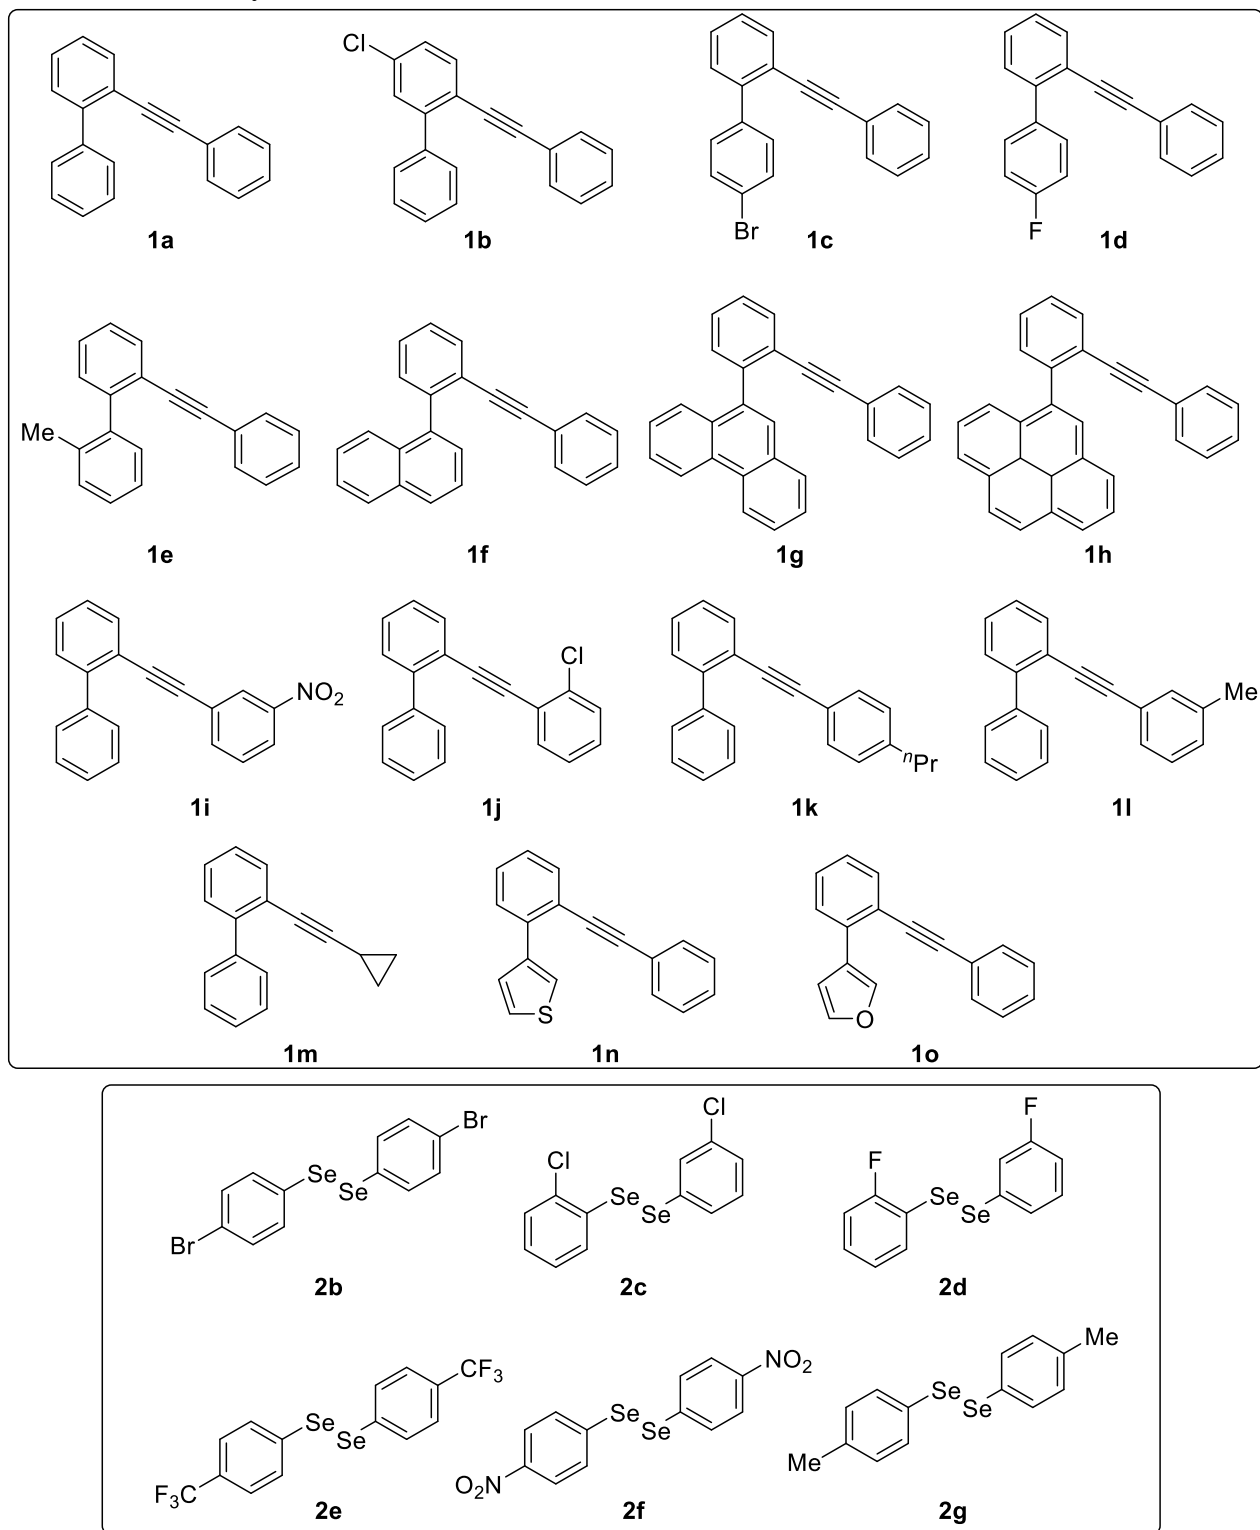

### 3. General experimental procedure for the synthesis of 9-selenylphenanthrenes (3aa-3ah and 3ba–3ma) and selenyl polycyclic heteroaromatics (3na and 3oa).

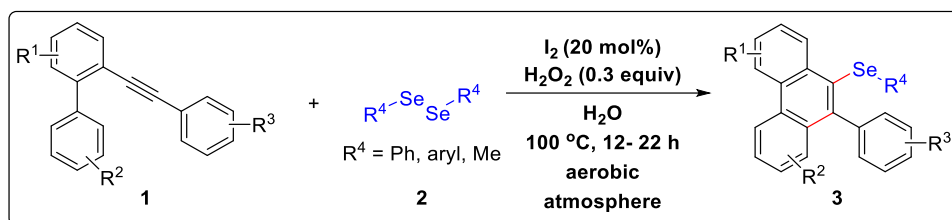

**Representative experimental procedure for the synthesis of phenyl(10-phenylphenanthren-9-yl)selane (3aa):** 2-(phenylethynyl)-1,1'-biphenyl **1a** (0.127 g, 0.5 mmol, 1 equiv), 1,2-diphenyldislane **2a** (0.094 g, 0.3 mmol, 0.6 equiv) and  $I_2$  (0.0254 g, 0.1 mmol) were taken in a round-bottomed flask (RBF) and  $H_2O$  (0.3 mL) was added to it. Then 30% aqueous  $H_2O_2$  (v/v) (0.012 mL, 0.15 mmol, 0.3 equiv) was added to the RBF and the reaction mixture was stirred in an oil bath at 100 °C under aerobic atmosphere. The progress of the reaction was monitored by TLC. The solution was then transferred to a separating funnel for extraction. The reaction mixture was extracted with ethyl acetate twice (2 X 20 mL) and the combined organic layer was washed with water (3 X 10 mL). The solvent was evaporated under reduced pressure and iodine was recovered from the reaction mixture first by column chromatography using pentane as eluent. The column chromatography process was further continued to afford the pure product, phenyl(10-phenylphenanthren-9-yl)selane **3aa** (0.202 g, 0.495 mmol) in 98% yield using hexane as eluent.

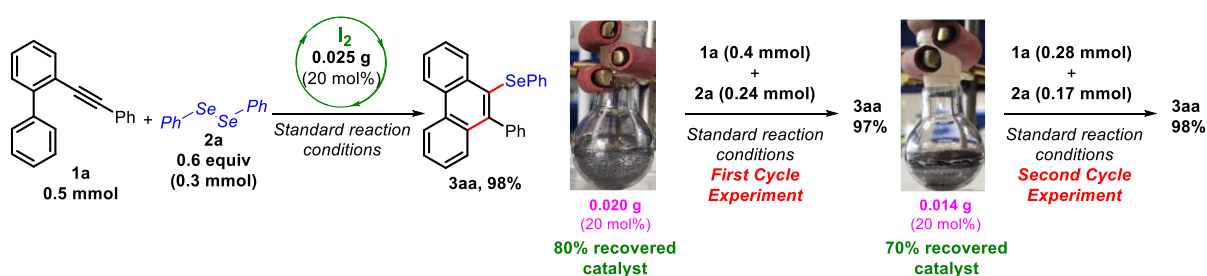

**3.1. Gram-scale synthesis of phenyl(10-phenylphenanthren-9-yl)selane (3aa):** 2-(Phenylethynyl)-1,1'-biphenyl **1a** (1.017 g, 4 mmol, 1 equiv), 1,2-diphenyldislane **2a** (0.749 g, 2.4 mmol, 0.6 equiv) and  $I_2$  (0.203 g, 0.8 mmol) were taken in a RBF and  $H_2O$  (2.4 mL) was added to it. Then 30% aqueous  $H_2O_2$  (v/v) (0.096 mL, 1.2 mmol, 0.3 equiv) was added to the RBF and the reaction mixture was stirred in an oil bath at 100 °C under aerobic

atmosphere. The progress of the reaction was monitored by TLC. The solution was then transferred to a separating funnel for extraction. The reaction mixture was extracted with ethyl acetate twice (2 X 20 mL) and the combined organic layer was washed with water (3 X 10 mL). The solvent was evaporated under reduced pressure and iodine was recovered from the reaction mixture first by column chromatography using pentane as eluent. The column chromatography process was further continued to afford the pure product, phenyl(10-phenylphenanthren-9-yl)selane **3aa** (1.32 g, 3.224 mmol) in 80.6% yield.

#### 4. Experimental procedure for the synthesis of 9-phenyl-10-(phenylseleninyl)phenanthrene.<sup>7</sup>

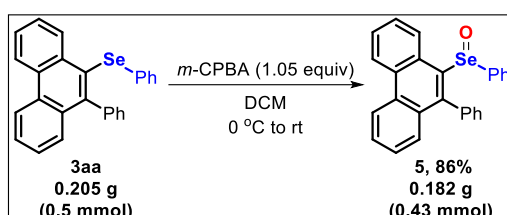

3-Chloroperoxybenzoic acid, *m*-CPBA (purity: 65-70%) (0.140 g, 0.525 mmol) was added to a solution of phenyl(10-phenylphenanthren-9-yl)selane **3aa** (0.205 g, 0.5 mmol) dissolved in dichloromethane (2.5 mL) at 0 °C. The reaction mixture was cooled at 0 °C. Then, the reaction mixture was stirred vigorously for 2 h. After the completion of the reaction the solvent was evaporated under reduced pressure. The crude reaction mixture was extracted with dichloromethane thrice (3 x 10 mL). The combined organic layer was washed with water (3 x 10 mL) and evaporated under reduced pressure. The crude product was purified by flash column chromatography through silica gel to afford the 9-phenyl-10-(phenylseleninyl)phenanthrene **5** in (0.182 g, 0.43 mmol) in 86% yield.

#### 4.1. Experimental procedure of Suzuki coupling reaction of 4-bromophenyl(10-phenylphenanthren-9-yl)selane **3ab** and (2-bromo-10-phenylphenanthren-9-yl)(phenyl)selane **3ca**.<sup>8</sup>

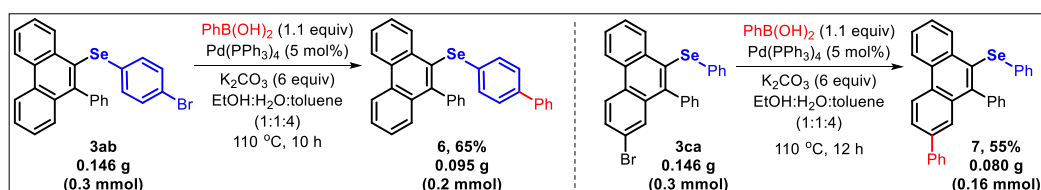

**Representative experimental procedure for the Suzuki reaction with 3ab:** 4-Bromophenyl(10-phenylphenanthren-9-yl)selane **3ab** (0.146 g, 0.3 mmol, 1 equiv), phenyl boronic acid (0.040 g, 0.33 mmol), Pd(PPh<sub>3</sub>)<sub>4</sub> (0.017 g, 0.015 mmol), K<sub>2</sub>CO<sub>3</sub> (0.248 g, 1.8 mmol) and solvent (0.96 mL, EtOH : H<sub>2</sub>O : PhMe = 1:1:4.4) were taken in a 25 mL round-bottom flask (RBF). The reaction mixture was refluxed at 110 °C and the progress of the reaction was monitored by thin layer chromatography. The mixture was cooled to room temperature and extracted with ethyl acetate (30x3 mL) three times. The combined organic layer was further washed with brine (30 mL) and subsequently dried over anhydrous Na<sub>2</sub>SO<sub>4</sub>. Finally the solvent was evaporated under reduced pressure to get the crude product which was purified by flash column chromatography on silica gel to afford [1,1'-biphenyl]-4-yl(10-phenylphenanthren-9-yl)selane **6** (0.0958 g, 0.2 mmol) in 65% yield.

## 5. X-ray crystal structure of 3ba, 3ea, 3la

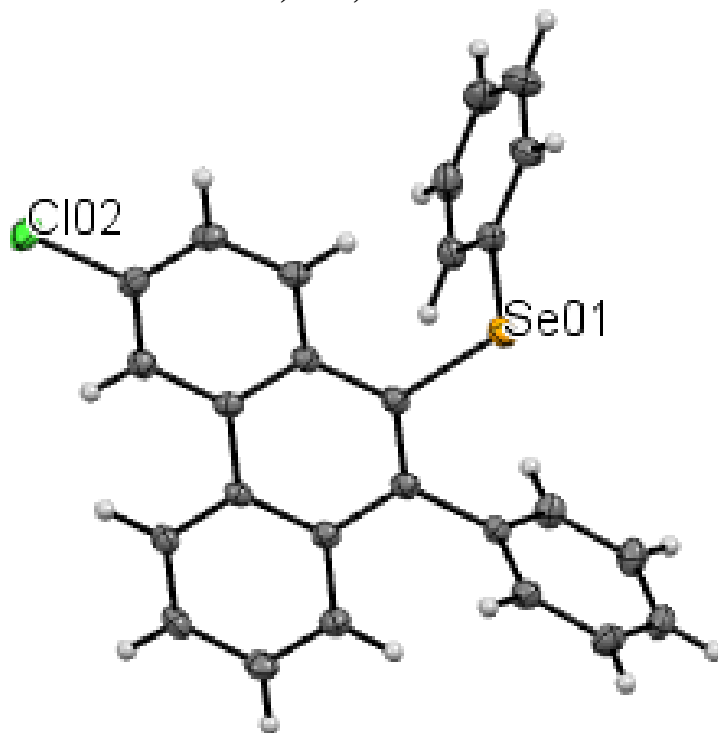

**Figure S1.** X-ray crystal structure of **3ba** (thermal ellipsoids shown at 50% probability) including hetero-atom numbering.

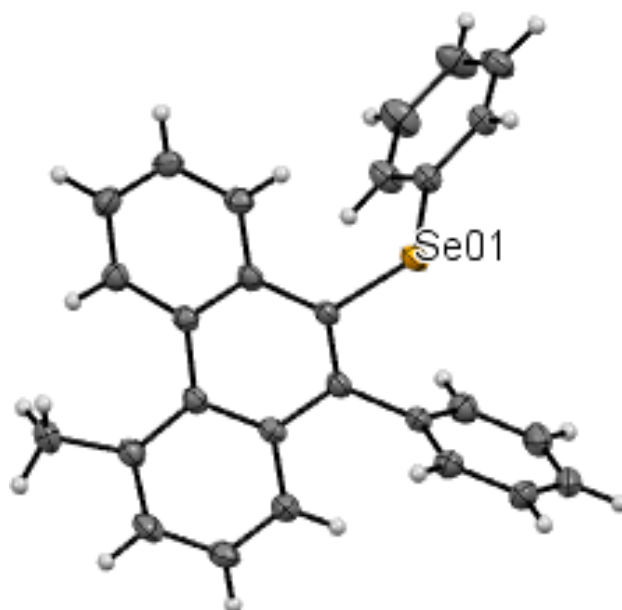

**Figure S2.** X-ray crystal structure of **3ea** (thermal ellipsoids shown at 50% probability) including hetero-atom numbering.

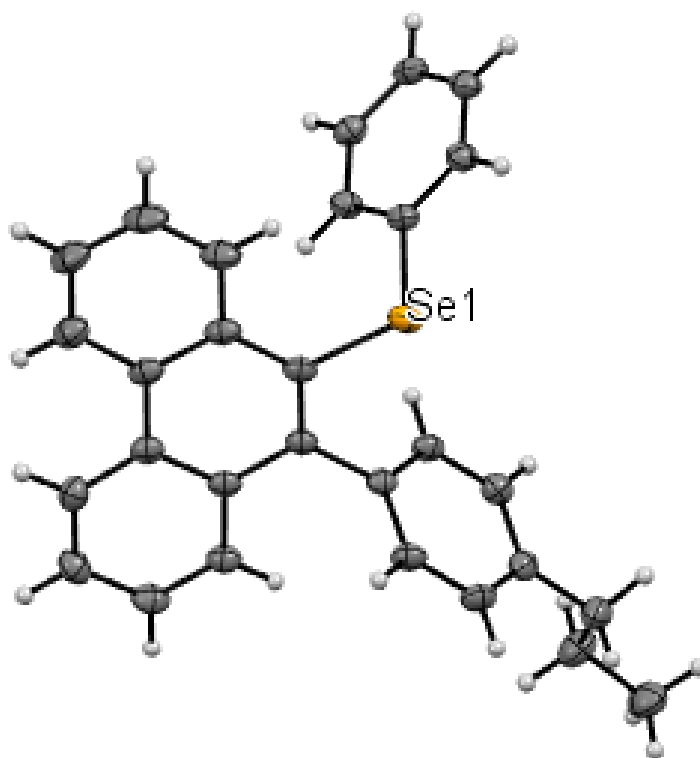

**Figure S3.** X-ray crystal structure of **3la** (thermal ellipsoids shown at 50% probability) including hetero-atom numbering.

### 5.1. Table-S1. Selected crystal data for compounds 3ba, 3ea, 3la

|                                                 | <b>3ba</b>                                         | <b>3ea</b>                                         | <b>3la</b>                                        |
|-------------------------------------------------|----------------------------------------------------|----------------------------------------------------|---------------------------------------------------|
| <i>Empirical formula</i>                        | C <sub>26</sub> H <sub>17</sub> ClSe               | C <sub>27</sub> H <sub>20</sub> Se                 | C <sub>29</sub> H <sub>24</sub> Se                |
| <i>Formula weight</i>                           | 443.80                                             | 423.419                                            | 451.47                                            |
| <i>Temperature/K</i>                            | 100                                                | 100                                                | 100                                               |
| <i>Crystal system</i>                           | monoclinic                                         | monoclinic                                         | triclinic                                         |
| <i>Space group</i>                              | P 1 21/c 1                                         | P 1 21/c 1                                         | P -1                                              |
| <i>a/Å</i>                                      | 15.3921(2)                                         | 11.2182(3)                                         | 9.9628(2)                                         |
| <i>b/Å</i>                                      | 10.18330(10)                                       | 10.3531(3)                                         | 10.1107(2)                                        |
| <i>c/Å</i>                                      | 13.1358(2)                                         | 17.3831(5)                                         | 12.9334(2)                                        |
| <i>α (°)</i>                                    | 90                                                 | 90                                                 | 71.458(2)                                         |
| <i>β (°)</i>                                    | 107.7750(10)                                       | 100.258(3)                                         | 73.161(2)                                         |
| <i>γ (°)</i>                                    | 90                                                 | 90                                                 | 63.999(2)                                         |
| <i>Volume/Å<sup>3</sup></i>                     | 1960.65(4)                                         | 1986.66(10)                                        | 1092.75(4)                                        |
| <i>Z</i>                                        | 4                                                  | 4                                                  | 2                                                 |
| <i>μ/mm<sup>-1</sup></i>                        | 3.894                                              | 2.605                                              | 2.402                                             |
| <i>D<sub>x</sub> [g cm<sup>-3</sup>]</i>        | 1.503                                              | 1.416                                              | 1.372                                             |
| <i>F(000)</i>                                   | 896                                                | 862.989                                            | 463.6                                             |
| <i>2θ range for data collection (°)</i>         | 5.5900-79.1990                                     | 4.0480-79.2670                                     | 5.0300-79.4120                                    |
| <i>Index ranges</i>                             | -19 ≤ h ≤ 19, -<br>-12 ≤ k ≤ 12, -<br>-16 ≤ l ≤ 13 | -13 ≤ h ≤ 14, -<br>-11 ≤ k ≤ 12, -<br>-16 ≤ l ≤ 21 | -12 ≤ h ≤ 9, -<br>-12 ≤ k ≤ 12, -<br>-16 ≤ l ≤ 16 |
| <i>Reflections measured</i>                     | 7962                                               | 5183                                               | 12419                                             |
| <i>Unique reflections</i>                       | 4133                                               | 4136                                               | 4610                                              |
| <i>Parameters /restraints/</i>                  | 321/0                                              | 254/0                                              | 285/0                                             |
| <i>Goodness-of-fit on F<sup>2</sup></i>         | 1.149                                              | 1.085                                              | 1.027                                             |
| <i>R<sub>1</sub> [I ≥ 2σ(I)]</i>                | 0.075                                              | 0.100                                              | 0.0309                                            |
| <i>wR<sub>2</sub> (all data)</i>                | 0.0882( 4133)                                      | 0.1256 (4136)                                      | 0.0814( 4610)                                     |
| <i>Largest diff. peak/hole/e Å<sup>-3</sup></i> | 0.548/-0.523                                       | 0.6378/-0.9648                                     | 0.5256/-0.6478                                    |
| <i>CCDC</i>                                     | <b>2176784</b>                                     | <b>2176838</b>                                     | <b>2170363</b>                                    |

**6. Table S2. Calculation of EcoScale score for the I<sub>2</sub>-catalyzed synthetic process to synthesize phenyl(10-phenylphenanthren-9-yl)selane (3aa) from 2-(phenylethynyl)-1,1'-biphenyl (1a) and diphenyl diselenide (2a)**

**EcoScale Calculation:**

**EcoScale = 100 - Sum of individual penalties**  
**Score on EcoScale: > 75, Excellent; >50, acceptable; <50, Inadequate**

| Parameters                                                                               | Penalty Points |
|------------------------------------------------------------------------------------------|----------------|
| 1. Yield: (100 - % of yield)/2 = (100 - 98)/2 = 1                                        | 1              |
| 2. Price of reaction components (To obtain 10 mmol of end product, <b>3aa</b> )          |                |
| <b>A. Calculation of Penalty Points :</b>                                                |                |
| a. 2-(Phenylethynyl)-1,1'-biphenyl = 10.2 mmol = 2.59 g = USD 13.84                      |                |
| [ Synthesis cost : Required Chemicals :                                                  |                |
| i) [1,1'-biphenyl]-2-amine = 2.54 g = USD 7.39                                           |                |
| ii) HCl = 7.8 mL = USD 0.25                                                              |                |
| iii) NaNO <sub>2</sub> = 1.26 g = USD 0.056                                              |                |
| iv) KI = 3.75 g = USD 1.192                                                              |                |
| v) Bis(triphenyl phosphine)Pd(II) dichloride = 0.089 g = USD 1.70                        |                |
| vi) CuI = 0.024 g = USD 0.008                                                            |                |
| vii) Phenyl acetylene = 1.68 mL = USD 2.35                                               |                |
| viii) Triethylamine = 33.15 mL = USD 0.343                                               |                |
| b. 1,2-diphenyldiselane = 6.12 mmol = 1.92 g = USD 7.68                                  |                |
| c. Iodine (As catalyst) = 2.02 mmol = 0.517 g = USD 0.152                                |                |
| d. Hydrogen Peroxide (30% aqueous solution) = 0.24 mL = USD 0.063                        |                |
| Total cost of synthesis of <b>3aa</b> = (13.30 + 7.68 + 0.152 + 0.063) = USD 21.195      |                |
| Thus expensive, since \$10 < (total cost of synthesis of 10 mmol of <b>3aa</b> ) < \$50: | 3              |
| 3. Safety                                                                                |                |
| 1,2-diphenyldiselane (T)                                                                 | 5              |
| Iodine (T)                                                                               | 5              |
| 4. Technical Setup                                                                       |                |
| Common Setup                                                                             | 0              |
| 5. Temperature/ Time                                                                     |                |
| 100 °C, 12 h (Heating, > 1h)                                                             | 3              |
| 6. Work up and purification :                                                            |                |
| a. Adding solvent                                                                        | 0              |
| b. Liquid-Liquid extraction                                                              | 3              |
| c. Classical Chromatography                                                              | 10             |
| <b>Total penalty points:</b>                                                             | <b>30</b>      |

**B. EcoScale calculation:**

**EcoScale score: (100 - 30) = 70 (>50; it is an acceptable synthesis)**

## 7. *In situ* detection of phenylselenenyl iodide PhSeI by LC-MS

### ==== Shimadzu LabSolutions Data Report ====

#### <Spectrum>

Line#: 1 R.Time: 0.78(Scan#: 285)  
MassPeaks: 120  
RawMode: Single 0.78(285) BasePeak: 102(153212)  
BG Mode: None Segment 1 - Event 1

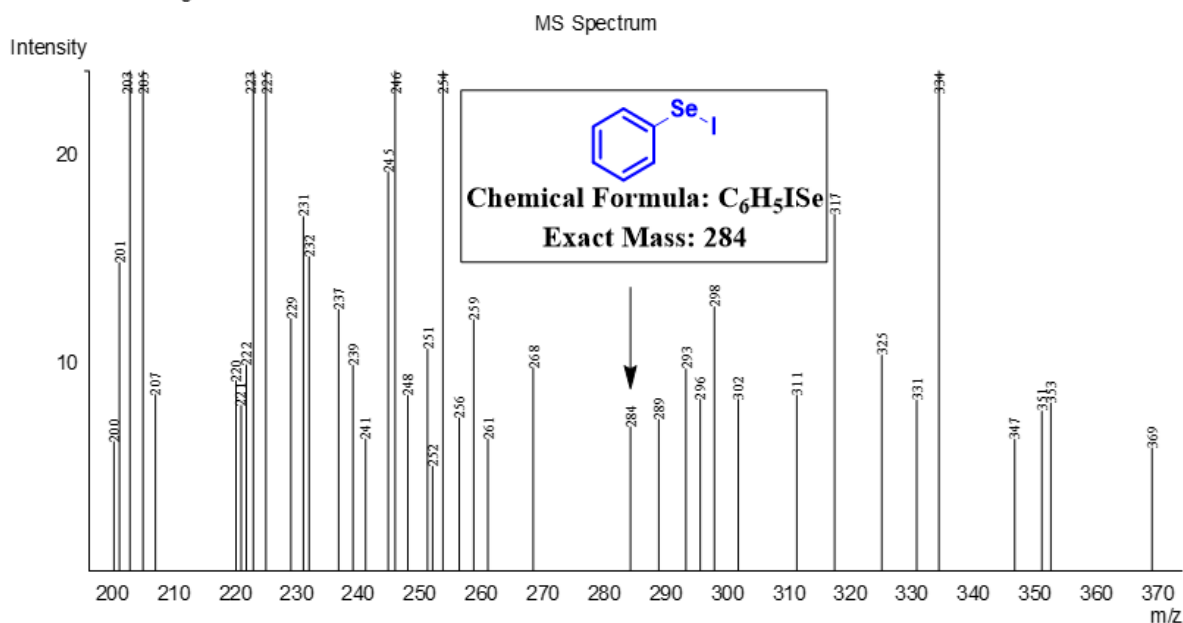

**Figure S4.** Mass spectrum of the reaction mixture of diphenyl diselenide and  $I_2$

## 8. Calculation of the bond dissociation energies (BDE) for PhSe-X (X = Cl, Br, and I)

The bond dissociation energies (BDE) for PhSe-X (X=Cl, Br, and I) were calculated using the following equation:

$$BDE_X = E_{PhSe\cdot} + E_{X\cdot} - E_{PhSeX}$$

where,  $E_{PhSeX}$  represents Gibb's free energy for PhSeX (X= Cl, Br, I),  $E_{PhSe\cdot}$  represents Gibb's free energy for PhSe $\cdot$  radical, and  $E_{X\cdot}$  is Gibb's free energy for halogen radical.

**8.1. Table S3. The bond dissociation energies (kcal/mol) of the Se-X bond (X = Cl, Br, I) at the M06-2X/LanL2DZ level of theory in water as an implicit solvent**

| System | Bond dissociation energy (Se-X bond, X=Cl, Br, I ) |
|--------|----------------------------------------------------|
| PhSeCl | 47.53                                              |
| PhSeBr | 39.57                                              |
| PhSeI  | 34.40                                              |

**9. *In situ* detection of (2,2-diphenylvinyl)(phenyl)selane by LC-MS**

**==== Shimadzu LabSolutions Data Report ====**

**<Spectrum>**

Line#:1 R.Time:---(Scan#---)

MassPeaks:83

RawMode:Averaged 0.32-0.84(111-289) BasePeak:407.1500(2534322)

BG Mode:Averaged 0.87-1.98(299-681) Segment 1 - Event 1

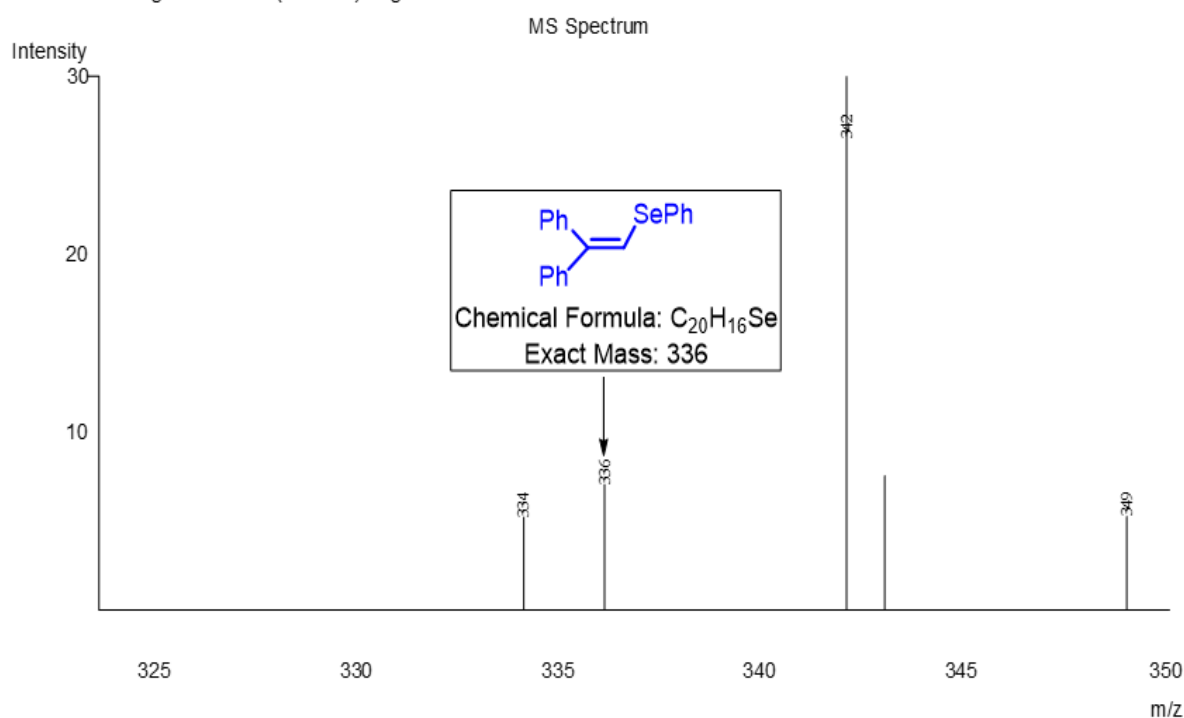

**Figure S5.** Mass spectrum of the reaction mixture of **1a** and diphenyl diselenide **2a** in the presence of radical quencher, ethene-1,1-diylidibenzene under standard reaction

## 10. Free energy barrier for the initial step for the polar pathway

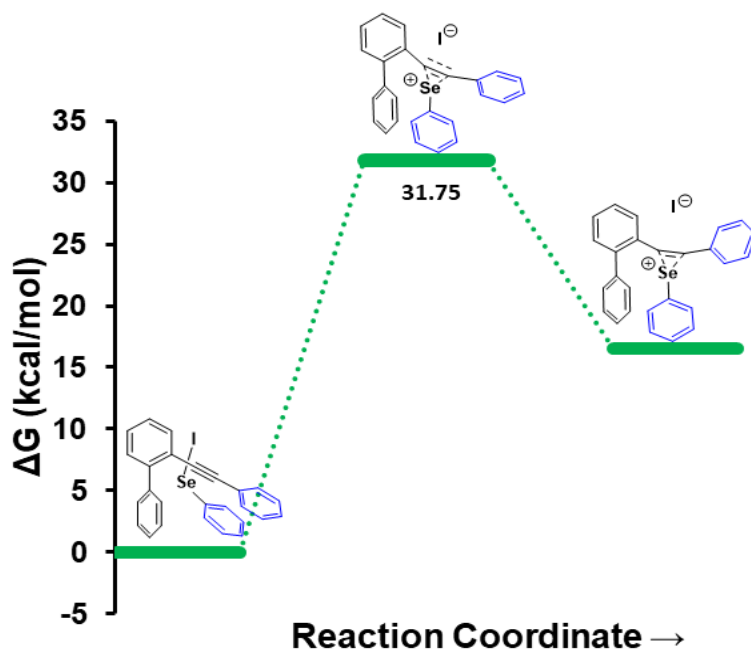

**Figure S6.** Free energy profile for the initial step of for the conversion of **1a** and PhSeI to **3aa** through the polar pathway in water

## 11. Analytical data of all synthesized products (**3aa** - **3ah**, **3ba** - **3oa** and **5**, **6**, **7**)

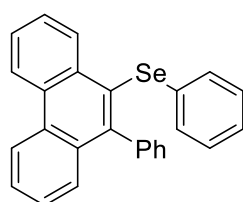

**Phenyl(10-phenylphenanthren-9-yl)selane (**3aa**):**<sup>9</sup> Yellow solid (0.201 g, 98%); eluent hexane; mp = 82–84 °C; <sup>1</sup>H NMR (400 MHz, CDCl<sub>3</sub>) δ 8.85 – 8.74 (m, 3H), 7.72 (m, 2H), 7.62 (ddd, *J* = 8.2, 7.0, 1.2 Hz, 1H), 7.56 – 7.50 (m, 2H), 7.50 – 7.46 (m, 3H), 7.33 – 7.27 (m, 2H), 7.10 (d, *J* = 1.5 Hz, 5H). <sup>13</sup>C NMR (100 MHz, CDCl<sub>3</sub>) δ 146.81, 141.95, 134.23, 132.42, 132.13, 131.07, 130.70, 130.62, 129.65, 129.13, 128.90, 127.94, 127.61, 127.57, 127.43, 127.29, 127.02, 126.72, 125.47, 122.68, 122.55 (Overlapping peaks are present). <sup>77</sup>Se NMR (76 MHz, DMSO-*d*<sub>6</sub>) δ 318.29 (s).

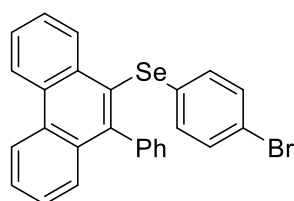

**4-Bromophenyl(10-phenylphenanthren-9-yl)selane (**3ab**):** Yellow solid (0.185 g, 76%); eluent hexane; mp = 127–129 °C; <sup>1</sup>H NMR (400 MHz, CDCl<sub>3</sub>) δ 8.61 (t, *J* = 7.4 Hz, 2H), 8.50 (dd, *J* = 8.3, 1.0 Hz, 1H), 7.56 – 7.50 (m, 2H), 7.43 (ddd, *J* = 8.2, 7.0, 1.2 Hz, 1H), 7.37 – 7.27 (m, 5H), 7.10 – 7.06 (m, 2H), 7.02 – 6.96 (m, 2H), 6.78 – 6.70 (m, 2H). <sup>13</sup>C NMR

(100 MHz, CDCl<sub>3</sub>)  $\delta$  146.99, 141.75, 133.18, 132.11, 132.02, 131.88, 131.09, 130.74, 130.59, 130.31, 129.54, 128.91, 127.99, 127.68, 127.61, 127.40, 127.14, 126.81, 122.78, 122.55, 119.35 55 (Overlapping peaks are present). <sup>77</sup>Se NMR (76 MHz, CDCl<sub>3</sub>)  $\delta$  323.21 (s). HRMS (ESI) *m/z* calcd for C<sub>26</sub>H<sub>17</sub>BrSe [M]: 487.9679; found: 487.9665.

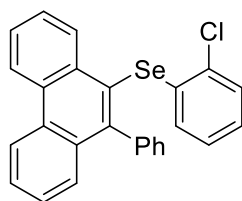

**(2-Chlorophenyl)(10-phenylphenanthren-9-yl)selane (3ac):** Yellow solid (0.160 g, 72%); eluent hexane; <sup>1</sup>H NMR (400 MHz, CDCl<sub>3</sub>)  $\delta$  8.84 (t, *J* = 8.8 Hz, 2H), 8.70 (dd, *J* = 8.3, 1.0 Hz, 1H), 7.75 (ddd, *J* = 15.7, 7.7, 1.3 Hz, 2H), 7.67 – 7.60 (m, 2H), 7.58 – 7.53 (m, 1H), 7.52 – 7.47 (m, 3H), 7.33 (ddd, *J* = 6.0, 3.4, 1.5 Hz, 3H), 7.03 (td, *J* = 7.7, 1.5 Hz, 1H), 6.85 (td, *J* = 7.8, 1.3 Hz, 1H), 6.70 (dd, *J* = 8.0, 1.5 Hz, 1H). <sup>13</sup>C NMR (100 MHz, CDCl<sub>3</sub>)  $\delta$  147.63, 141.55, 134.67, 132.31, 132.12, 132.09, 131.21, 130.70, 130.27, 129.45, 129.25, 129.07, 128.97, 127.98, 127.76, 127.69, 127.44, 127.19, 127.04, 126.77, 126.71, 126.20, 122.74, 122.56. <sup>77</sup>Se NMR (76 MHz, CDCl<sub>3</sub>)  $\delta$  321.32 (s). HRMS (ESI) *m/z* calcd for C<sub>26</sub>H<sub>17</sub>ClSe [M]: 444.0184; found: 444.0191.

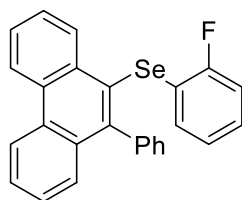

**(2-Fluorophenyl)(10-phenylphenanthren-9-yl)selane (3ad):** Yellow solid (0.151 g, 71%); eluent hexane; <sup>1</sup>H NMR (400 MHz, CDCl<sub>3</sub>)  $\delta$  8.81 (d, *J* = 8.8 Hz, 2H), 8.65 (dd, *J* = 8.3, 1.0 Hz, 1H), 7.74 – 7.68 (m, 2H), 7.61 – 7.57 (m, 1H), 7.51 – 7.49 (m, 2H), 7.47 – 7.43 (m, 3H), 7.27 (s, 1H), 7.25 – 7.24 (m, 1H), 7.05 (dtd, *J* = 6.4, 5.4, 2.7 Hz, 1H), 6.98 – 6.93 (m, 1H), 6.77 – 6.72 (m, 1H), 6.70 – 6.65 (m, 1H). <sup>13</sup>C NMR (100 MHz, CDCl<sub>3</sub>)  $\delta$  159.79 (d, <sup>1</sup>*J*<sub>C-F</sub> = 241 Hz), 147.50, 141.68, 132.22 (d, <sup>3</sup>*J*<sub>C-F</sub> = 18 Hz), 131.18, 130.72, 130.32, 129.50, 128.92, 128.01, 127.68, 127.63, 127.45, 127.28, 127.15, 127.08, 126.79, 125.81, 125.53, 124.68, 124.66, 122.67 (d, <sup>3</sup>*J*<sub>C-F</sub> = 17 Hz), 120.96 (d, <sup>2</sup>*J*<sub>C-F</sub> = 22 Hz), 115 (d, <sup>2</sup>*J*<sub>C-F</sub> = 22 Hz). <sup>77</sup>Se NMR (76 MHz, CDCl<sub>3</sub>)  $\delta$  321.26 (s). <sup>19</sup>F NMR (377 MHz, CDCl<sub>3</sub>)  $\delta$  -106.16 (s). HRMS (ESI) *m/z* calcd for C<sub>26</sub>H<sub>17</sub>FSe [M]: 428.0480; found: 428.0483.

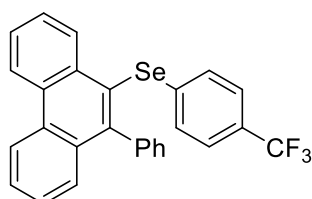

**(10-Phenylphenanthren-9-yl)(4-(trifluoromethyl)phenyl)selane (3ae):** Yellow solid (0.16 g, 67%); eluent hexane; mp = 190–192 °C; <sup>1</sup>H NMR (400 MHz, CDCl<sub>3</sub>)  $\delta$  8.78 – 8.73 (m, 2H), 8.58 (d, *J* = 8.2 Hz, 1H), 7.66 (m, 2H), 7.56 (dd, *J* = 11.2, 4.0 Hz, 1H), 7.48 – 7.38 (m, 5H), 7.26 – 7.18 (m, 4H), 7.07 (d, *J* = 8.2 Hz, 2H). <sup>13</sup>C NMR (100 MHz, CDCl<sub>3</sub>)  $\delta$  147.40, 141.71, 139.69, 132.07, 131.24, 130.82, 130.17, 129.45, 129.03, 128.61, 128.05,

127.84, 127.82, 127.67, 127.52, 127.30, 126.91, 126.47, 125.61, 125.58, 122.89, 122.62, 120.10.  $^{77}\text{Se}$  NMR (76 MHz,  $\text{CDCl}_3$ )  $\delta$  333.47 (s).  $^{19}\text{F}$  NMR (76 MHz,  $\text{CDCl}_3$ )  $\delta$  -62.44 (s). HRMS (ESI)  $m/z$  calcd for  $\text{C}_{27}\text{H}_{17}\text{F}_3\text{Se}$  [M]: 478.0448; found: 478.0447.

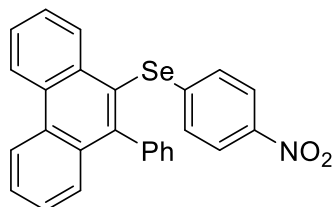

**(4-Nitrophenyl)(10-phenylphenanthren-9-yl)selane (3af):**

Yellow solid (0.151 g, 66%); eluent hexane; mp = 170–172 °C;  $^1\text{H}$  NMR (400 MHz,  $\text{CDCl}_3$ )  $\delta$  8.74 (d,  $J$  = 4.0 Hz, 2H), 8.49 (d,  $J$  = 7.8 Hz, 1H), 7.82 (d,  $J$  = 8.0 Hz, 2H), 7.67 (d,  $J$  = 5.6 Hz, 2H), 7.58 – 7.53 (m, 1H), 7.44 (d,  $J$  = 26.3 Hz, 5H), 7.19 (s, 2H), 7.06 (d,  $J$  = 7.9 Hz, 2H).  $^{13}\text{C}$  NMR (100 MHz,  $\text{CDCl}_3$ )  $\delta$  147.74, 145.61, 145.13, 141.50, 131.99, 131.79, 131.35, 130.93, 129.79, 129.29, 129.12, 128.39, 128.13, 128.09, 127.99, 127.71, 127.49, 127.05, 125.82, 123.79, 123.04, 122.68.  $^{77}\text{Se}$  NMR (76 MHz,  $\text{CDCl}_3$ )  $\delta$  350.20 (s). HRMS (ESI),  $m/z$  calcd for  $\text{C}_{26}\text{H}_{18}\text{NO}_2\text{Se}$  [M + H] $^+$ : 456.0497; found: 456.0499.

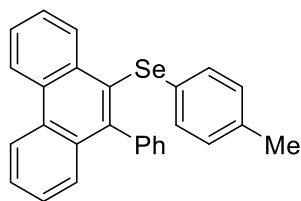

**(10-Phenylphenanthren-9-yl)(*p*-tolyl)selane (3ag):**<sup>10</sup> White solid

(0.146 g, 69%); eluent hexane; mp = 110–112 °C;  $^1\text{H}$  NMR (400 MHz,  $\text{CDCl}_3$ )  $\delta$  8.85 – 8.74 (m, 3H), 7.71 (m, 2H), 7.61 (m, 1H), 7.57 – 7.44 (m, 5H), 7.36 – 7.28 (m, 2H), 7.01 (d,  $J$  = 8.2 Hz, 2H), 6.91 (d,  $J$  = 8.0 Hz, 2H), 2.24 (s, 3H).  $^{13}\text{C}$  NMR (100 MHz,  $\text{CDCl}_3$ )  $\delta$  146.62, 142.03, 135.26, 132.45, 132.13, 131.02, 130.69, 130.32, 129.73, 129.28, 128.85, 127.93, 127.51, 127.34, 127.25, 126.94, 126.68, 122.65, 122.52, 20.8855 (Overlapping peaks are present).

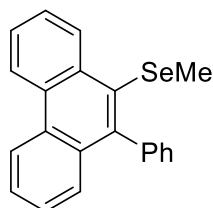

**Methyl(10-phenylphenanthren-9-yl)selane (3ah):** Yellow solid (0.129 g,

74%); eluent hexane; mp = 150–152 °C;  $^1\text{H}$  NMR (400 MHz,  $\text{CDCl}_3$ )  $\delta$  8.77 (d,  $J$  = 7.5 Hz, 1H), 8.66 (t,  $J$  = 7.7 Hz, 2H), 7.62 (dd,  $J$  = 6.3, 2.5 Hz, 2H), 7.56 – 7.53 (m, 1H), 7.44 – 7.42 (m, 2H), 7.36 – 7.33 (m, 2H), 7.23 (dd,  $J$  = 5.4, 1.5 Hz, 2H), 7.15 (d,  $J$  = 2.4 Hz, 1H), 1.96 (s, 3H).  $^{13}\text{C}$  NMR (100 MHz,  $\text{CDCl}_3$ )  $\delta$  145.44, 142.42, 132.32, 131.92, 130.55, 130.35, 129.94, 129.37, 128.53, 128.01, 127.68, 127.43, 127.21, 126.99, 126.81, 126.64, 122.91, 122.44, 10.04.  $^{77}\text{Se}$  NMR (76 MHz,  $\text{CDCl}_3$ )  $\delta$  118.24 (s). Anal calcd for  $\text{C}_{21}\text{H}_{16}\text{Se}$ : C, 72.62; H, 4.64; found C, 72.26; H, 4.92.

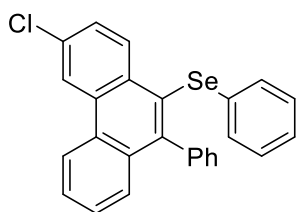

**(6-Chloro-10-phenylphenanthren-9-yl)(phenyl)selane (3ba):** Off White solid (0.120 g, 54%); eluent hexane; mp = 163–165 °C;  $^1\text{H}$  NMR (400 MHz,  $\text{CDCl}_3$ )  $\delta$  8.72 (d,  $J$  = 2.1 Hz, 1H), 8.69 (d,  $J$  = 8.4 Hz, 1H), 8.63 (d,  $J$  = 8.9 Hz, 1H), 7.71 (m, 1H), 7.53 – 7.43 (m, 6H), 7.25 – 7.22 (m, 2H), 7.10 – 7.00 (m, 5H).  $^{13}\text{C}$  NMR (100 MHz,  $\text{CDCl}_3$ )  $\delta$  147.04, 141.63, 133.87, 133.28, 132.45, 132.36, 131.80, 130.86, 130.09, 129.61, 129.20, 129.03, 128.03, 127.93, 127.72, 127.47, 127.39, 127.14, 125.72, 122.63, 122.32 55 (Overlapping peaks are present).  $^{77}\text{Se}$  NMR (76 MHz,  $\text{CDCl}_3$ )  $\delta$  325.10 (s). HRMS (ESI)  $m/z$  calcd for  $\text{C}_{26}\text{H}_{17}\text{ClSe}$   $[\text{M}]$ : 444.0184; found: 444.0190; the assignment is also supported by an X-ray crystallographic structure determination (CCDC 2176784).

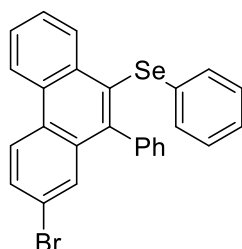

**(2-Bromo-10-phenylphenanthren-9-yl)(phenyl)selane (3ca):** Yellowish viscous solid (0.210 g, 86%); eluent hexane; mp = 190–192 °C;  $^1\text{H}$  NMR (400 MHz,  $\text{CDCl}_3$ )  $\delta$  9.03 – 8.89 (m, 2H), 8.85 – 8.75 (m, 1H), 7.95 – 7.82 (m, 3H), 7.81 – 7.77 (m, 1H), 7.66 (dd,  $J$  = 4.5, 2.2 Hz, 4H), 7.49 – 7.43 (m, 2H), 7.26 (s, 4H).  $^{13}\text{C}$  NMR (100 MHz,  $\text{CDCl}_3$ )  $\delta$  146.76, 145.53, 141.89, 141.06, 133.89, 133.44, 132.30, 130.84, 130.75, 130.45, 130.12, 129.56, 129.21, 128.93, 128.11, 127.59, 126.98, 126.68, 125.62, 124.31, 122.52, 121.01.  $^{77}\text{Se}$  NMR (76 MHz,  $\text{CDCl}_3$ )  $\delta$  328.34 (s). HRMS (ESI)  $m/z$  calcd for  $\text{C}_{26}\text{H}_{17}\text{BrSe}$   $[\text{M}]^+$ : 487.9679; found: 487.9707.

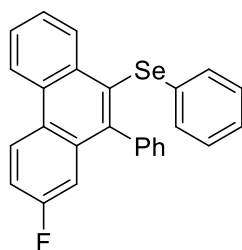

**(2-Fluoro-10-phenylphenanthren-9-yl)(phenyl)selane (3da):** Yellow solid (0.161 g, 75%); eluent hexane; mp = 140–142 °C;  $^1\text{H}$  NMR (400 MHz,  $\text{CDCl}_3$ )  $\delta$  8.79 – 8.75 (m, 1H), 8.74 – 8.71 (m, 1H), 8.68 (d,  $J$  = 8.1 Hz, 1H), 7.69 (m, 1H), 7.58 (m, 1H), 7.46 (dd,  $J$  = 5.0, 1.9 Hz, 3H), 7.45 – 7.41 (m, 1H), 7.26 – 7.22 (m, 2H), 7.14 (dd,  $J$  = 10.8, 2.7 Hz, 1H), 7.07 (s, 5H).  $^{13}\text{C}$  NMR (100 MHz,  $\text{CDCl}_3$ )  $\delta$  161.18 (d,  $^1J_{\text{C-F}}$  = 245 Hz), 145.98, 141.40, 133.97, 133.64 (d,  $^3J_{\text{C-F}}$  = 8 Hz), 131.97, 130.79, 130.34, 129.56, 129.30, 129.23, 128.97, 128.16, 127.67, 127.58, 127.38, 125.66, 124.90 (d,  $^3J_{\text{C-F}}$  = 9 Hz) 122.52, 116.3 (d,  $^2J_{\text{C-F}}$  = 24 Hz), 113.27 (d,  $^2J_{\text{C-F}}$  = 22 Hz) (Overlapping peaks are present).  $^{77}\text{Se}$  NMR (76 MHz,  $\text{CDCl}_3$ )  $\delta$  327.35 (s).  $^{19}\text{F}$  NMR (377 MHz,  $\text{CDCl}_3$ )  $\delta$  -113.38 (s). HRMS (ESI)  $m/z$  calcd for  $\text{C}_{26}\text{H}_{17}\text{FSe}$   $[\text{M}]^+$ : 428.0480; found: 428.0506.

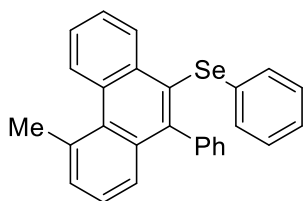

**(4-Methyl-10-phenylphenanthren-9-yl)(phenyl)selane (3ea):** Off White solid (0.176 g, 83%); eluent hexane; mp = 130–132 °C;  $^1\text{H}$  NMR (400 MHz,  $\text{CDCl}_3$ )  $\delta$  8.79 (d,  $J$  = 8.0 Hz, 1H), 8.75 (dd,  $J$  = 8.2, 1.4 Hz, 1H), 7.52 (m, 3H), 7.42 – 7.34 (m, 4H), 7.28 (dd,  $J$  = 8.1, 7.1 Hz, 1H), 7.19 (dd,  $J$  = 6.4, 3.1 Hz, 2H), 7.05 – 6.94 (m, 5H), 3.11 (s, 3H).  $^{13}\text{C}$  NMR (100 MHz,  $\text{CDCl}_3$ )  $\delta$  147.13, 142.61, 134.85, 134.21, 133.58, 133.28, 132.00, 131.82, 131.29, 130.31, 129.65, 129.13, 128.87, 127.90, 127.74, 127.62, 127.30, 127.17, 126.81, 125.73, 125.55, 125.42, 27.22.  $^{77}\text{Se}$  NMR (76 MHz,  $\text{CDCl}_3$ )  $\delta$  324.16 (s). The assignment is supported by an X-ray crystallographic structure determination (CCDC 2176838).

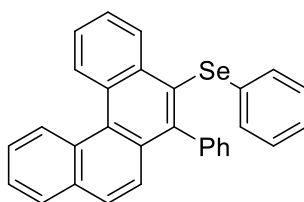

**Phenyl(6-phenylbenzo[c]phenanthren-5-yl)selane (3fa):**<sup>10</sup> Off White solid (0.102 g, 44%); eluent hexane; mp = 122–124 °C;  $^1\text{H}$  NMR (400 MHz,  $\text{CDCl}_3$ )  $\delta$  9.11 (t,  $J$  = 8.3 Hz, 2H), 8.84 (d,  $J$  = 8.2 Hz, 1H), 8.01 (d,  $J$  = 7.6 Hz, 1H), 7.81 – 7.58 (m, 6H), 7.47 (m, 4H), 7.28 (dd,  $J$  = 7.2, 2.2 Hz, 2H), 7.08 (s, 5H).  $^{13}\text{C}$  NMR (100 MHz,  $\text{CDCl}_3$ )  $\delta$  146.01, 141.94, 134.24, 133.65, 133.45, 130.51, 130.26, 130.02, 129.55, 129.44, 129.09, 128.93, 128.86, 128.57, 128.19, 127.98, 127.40, 127.12, 127.03, 126.56, 126.22, 126.18, 125.70, 125.60.

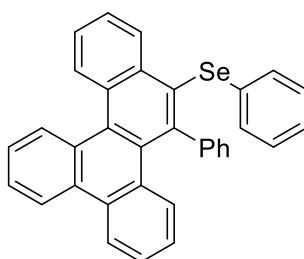

**Phenyl(5-phenylbenzo[g]chrysen-6-yl)selane (3ga):**<sup>10</sup> Off White solid (0.140 g, 55%); eluent hexane; mp = 210–212 °C;  $^1\text{H}$  NMR (400 MHz,  $\text{CDCl}_3$ )  $\delta$  8.81 – 8.66 (m, 4H), 8.58 (d,  $J$  = 8.0 Hz, 1H), 7.71 (m, 2H), 7.63 – 7.53 (m, 3H), 7.50 – 7.34 (m, 6H), 7.06 (s, 6H).  $^{13}\text{C}$  NMR (100 MHz,  $\text{CDCl}_3$ )  $\delta$  144.55, 143.37, 134.51, 133.77, 131.40, 131.29, 130.67, 130.25, 130.09, 129.93, 129.84, 129.54, 129.27, 129.14, 128.90, 128.67, 128.10, 127.88, 127.57, 127.23, 126.95, 126.49, 126.21, 125.97, 125.70, 125.61, 123.54, 123.03.

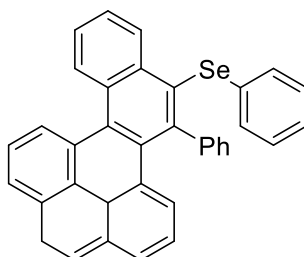

**Phenyl(14-phenyldibenzo[ij,no]tetrphen-13-yl)selane (3ha):**<sup>10</sup> Brown solid (0.182 g, 68%); eluent hexane; mp = 220–222 °C;  $^1\text{H}$  NMR (400 MHz,  $\text{CDCl}_3$ )  $\delta$  9.37 (d,  $J$  = 9.3 Hz, 1H), 9.16 (d,  $J$  = 8.2 Hz, 1H), 8.87 (dd,  $J$  = 8.2, 1.1 Hz, 1H), 8.32 (d,  $J$  = 9.3 Hz, 1H), 8.27 (d,  $J$  = 7.6 Hz, 1H), 8.16 (d,  $J$  = 7.2 Hz, 1H), 8.13 (s, 1H), 8.05 (t,  $J$  = 7.6 Hz, 1H), 7.98 (d,  $J$  = 9.0 Hz, 1H), 7.90 (d,  $J$  = 9.0 Hz, 1H), 7.78 – 7.73 (m, 1H), 7.68 (dd,  $J$  = 11.1, 4.1 Hz, 1H), 7.58 – 7.52 (m, 3H), 7.40 – 7.36 (m, 2H), 7.15 (dd,  $J$  = 6.5, 3.3 Hz, 2H),

7.12 – 7.06 (m, 3H).  $^{13}\text{C}$  NMR (100 MHz,  $\text{CDCl}_3$ )  $\delta$  146.39, 142.01, 134.17, 133.06, 131.65, 130.95, 130.59, 130.22, 129.97, 129.55, 129.40, 128.98, 128.12, 128.03, 127.85, 127.57, 127.33, 127.19, 127.13, 126.75, 126.40, 126.26, 126.13, 125.65, 125.19, 124.97, 124.76, 124.33.

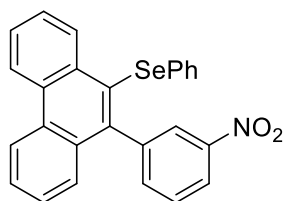

**(10-(3-Nitrophenyl)phenanthren-9-yl)(phenyl)selane (3ia):** Yellow

crystal (0.107 g, 47%); eluent hexane; mp = 150–152 °C;  $^1\text{H}$  NMR

(400 MHz,  $\text{CDCl}_3$ )  $\delta$  8.85 – 8.78 (m, 3H), 8.32 – 8.24 (m, 1H), 8.03 – 7.98 (m, 1H), 7.74 (d,  $J$  = 8.0 Hz, 2H), 7.66 (d,  $J$  = 1.2 Hz, 1H), 7.60

– 7.49 (m, 5H), 7.33 (dd,  $J$  = 8.4, 1.0 Hz, 1H), 7.06 – 7.04 (m, 2H), 6.98 (d,  $J$  = 1.6 Hz, 1H).

$^{13}\text{C}$  NMR (100 MHz,  $\text{CDCl}_3$ )  $\delta$  147.84, 143.16, 136.07, 133.50, 131.40, 131.16, 130.82, 130.58, 129.53, 129.10, 128.89, 128.63, 127.93, 127.89, 127.83, 127.68, 127.11, 126.14, 125.04, 122.92, 122.83, 122.35.  $^{77}\text{Se}$  NMR (76 MHz,  $\text{CDCl}_3$ )  $\delta$  352.1 (s). HRMS (ESI)  $m/z$  calcd for  $\text{C}_{26}\text{H}_{17}\text{NO}_2\text{Se}$  [M]: 455.0425; found: 455.0436.

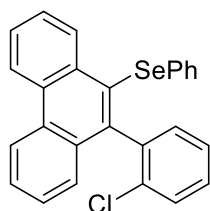

**(10-(2-Chlorophenyl)phenanthren-9-yl)(phenyl)selane (3ja):** Yellow

crystal (0.120 g, 54%); eluent hexane;  $^1\text{H}$  NMR (400 MHz,  $\text{CDCl}_3$ )  $\delta$  8.84

(t,  $J$  = 8.8 Hz, 2H), 8.70 (dd,  $J$  = 8.3, 1.0 Hz, 1H), 7.75 (m, 2H), 7.67 – 7.60 (m, 2H), 7.58 – 7.53 (m, 1H), 7.52 – 7.47 (m, 3H), 7.33 (ddd,  $J$  = 6.0, 3.4,

1.5 Hz, 3H), 7.03 (td,  $J$  = 7.7, 1.5 Hz, 1H), 6.85 (m, 1H), 6.70 (dd,  $J$  = 8.0, 1.5 Hz, 1H).  $^{13}\text{C}$  NMR (100 MHz,  $\text{CDCl}_3$ )  $\delta$  147.63, 141.55, 134.67, 132.31, 132.12, 132.09, 131.21, 130.70, 130.27, 129.45, 129.25, 129.07, 128.97, 127.98, 127.76, 127.69, 127.44, 127.19, 127.04, 126.77, 126.71, 126.20, 122.74, 122.56.  $^{77}\text{Se}$  NMR (76 MHz,  $\text{CDCl}_3$ )  $\delta$  322.65 (s). HRMS (ESI)  $m/z$  calcd for  $\text{C}_{26}\text{H}_{17}\text{ClSe}$  [M]: 444.0184; found: 444.0191.

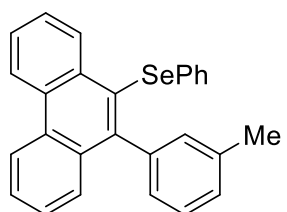

**Phenyl(10-(m-tolyl)phenanthren-9-yl)selane (3ka):** Yellow solid

(0.180 g, 85%); eluent hexane; mp = 140–142 °C;  $^1\text{H}$  NMR (400

MHz,  $\text{CDCl}_3$ )  $\delta$  8.82 (t,  $J$  = 7.4 Hz, 3H), 7.73 (m, 2H), 7.68 – 7.59 (m, 2H), 7.57 – 7.51 (m, 1H), 7.41 (t,  $J$  = 7.5 Hz, 1H), 7.33 (d,  $J$  = 7.6 Hz,

1H), 7.14 (ddd,  $J$  = 14.6, 6.8, 2.6 Hz, 7H), 2.43 (s, 3H).  $^{13}\text{C}$  NMR (100 MHz,  $\text{CDCl}_3$ )  $\delta$  146.91, 141.82, 137.39, 134.37, 132.48, 132.17, 131.02, 130.61, 130.40, 129.28, 128.92, 128.84, 127.99, 127.80, 127.63, 127.51, 127.36, 126.92, 126.67, 125.47, 122.66, 122.50, 21.50.  $^{77}\text{Se}$  NMR (76 MHz,  $\text{CDCl}_3$ )  $\delta$  323.31 (s). HRMS (ESI)  $m/z$  calcd for  $\text{C}_{27}\text{H}_{20}\text{Se}$  [M]: 424.0730; found: 424.0728.

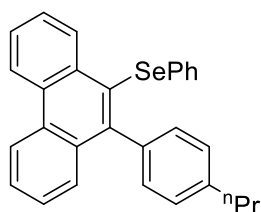

**Phenyl(10-(4-propylphenyl)phenanthren-9-yl)selane (3la)** :Reddish Brown solid (0.102 g, 45%); eluent hexane; mp = 125–127 °C;  $^1\text{H}$  NMR (400 MHz,  $\text{CDCl}_3$ )  $\delta$  8.67 (t,  $J$  = 8.6 Hz, 2H), 8.59 (dd,  $J$  = 8.3, 1.0 Hz, 1H), 7.61 – 7.55 (m, 2H), 7.49 – 7.45 (m, 1H), 7.42 (dd,  $J$  = 8.2, 1.4 Hz, 1H), 7.40 – 7.36 (m, 1H), 7.14 (d,  $J$  = 9.5 Hz, 3H), 7.04 (d,  $J$  = 8.1 Hz, 2H), 6.95 (s, 4H), 2.63 – 2.58 (m, 2H), 1.66 (dd,  $J$  = 15.1, 7.5 Hz, 2H), 0.93 (t,  $J$  = 7.3 Hz, 3H).  $^{13}\text{C}$  NMR (100 MHz,  $\text{CDCl}_3$ )  $\delta$  146.93, 141.66, 139.17, 134.35, 132.48, 132.34, 131.06, 130.65, 129.51, 129.28, 128.98, 128.88, 127.98, 127.81, 127.50, 127.36, 126.91, 126.68, 125.47, 122.67, 122.51, 37.92, 24.43, 13.95.  $^{77}\text{Se}$  NMR (76 MHz,  $\text{CDCl}_3$ )  $\delta$  323.50 (s). HRMS (ESI)  $m/z$  calcd for  $\text{C}_{29}\text{H}_{24}\text{Se}$  [M]: 452.1043; found: 452.1046; the assignment is supported by an X-ray crystallographic structure determination (CCDC 2170363).

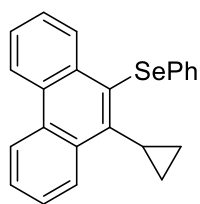

**(10-Cyclopropylphenanthren-9-yl)(phenyl)selane (3ma)**: Brown Viscous liquid (0.101 g, 54%); eluent hexane;  $^1\text{H}$  NMR (400 MHz,  $\text{CDCl}_3$ )  $\delta$  7.49 – 7.45 (m, 2H), 7.38 – 7.36 (m, 3H), 7.33 – 7.29 (m, 2H), 7.18 – 7.13 (m, 4H), 7.10 – 7.08 (m, 2H), 1.75 (ddd,  $J$  = 8.2, 5.2, 3.0 Hz, 1H), 0.75 – 0.67 (m, 2H), 0.64 – 0.57 (m, 1H), 0.43 – 0.35 (m, 1H).  $^{13}\text{C}$  NMR (100 MHz,  $\text{CDCl}_3$ )  $\delta$  143.49, 140.84, 140.44, 138.06, 134.34, 132.27, 130.95, 130.08, 129.57, 129.46, 129.37, 129.08, 128.85, 128.49, 128.43, 127.81, 127.18, 127.05, 126.43, 104.39, 24.23, 10.38, 9.41.  $^{77}\text{Se}$  NMR (76 MHz,  $\text{CDCl}_3$ )  $\delta$  410.69 (s). Anal calcd for  $\text{C}_{23}\text{H}_{18}\text{Se}$ : C, 73.99; H, 4.86; found C, 73.26; H, 4.49.

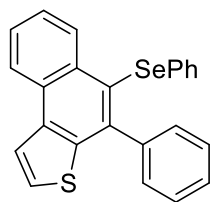

**4-Phenyl-5-(phenylselanyl)naphtho[2,1-*b*]thiophene (3na)**: Yellow solid (0.160 g, 77%); eluent hexane; mp = 95–97 °C;  $^1\text{H}$  NMR (400 MHz,  $\text{CDCl}_3$ )  $\delta$  8.76 (d,  $J$  = 8.3 Hz, 1H), 8.42 (dd,  $J$  = 8.1, 0.6 Hz, 1H), 8.08 (d,  $J$  = 5.5 Hz, 1H), 7.69 – 7.63 (m, 2H), 7.60 – 7.56 (m, 1H), 7.49 – 7.45 (m, 3H), 7.42 – 7.39 (m, 2H), 7.08 (s, 5H).  $^{13}\text{C}$  NMR (100 MHz,  $\text{CDCl}_3$ )  $\delta$  142.45, 141.77, 139.71, 137.00, 134.24, 132.82, 130.45, 129.10, 129.07, 128.89, 128.47, 128.10, 128.02, 126.78, 126.68, 126.56, 125.52, 123.91, 123.86, 122.24.  $^{77}\text{Se}$  NMR (76 MHz,  $\text{CDCl}_3$ )  $\delta$  306.69 (s). HRMS (ESI)  $m/z$  calcd for  $\text{C}_{24}\text{H}_{16}\text{SSe}$  [M]: 416.0138; found: 416.0139.

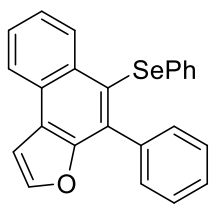

**4-Phenyl-5-(phenylselanyl)naphtho[2,1-*b*]furan (30a):** Brown solid (0.080 g, 40%); eluent hexane;  $^1\text{H}$  NMR (400 MHz,  $\text{CDCl}_3$ )  $\delta$  8.73 (d,  $J$  = 8.4 Hz, 1H), 8.21 (dd,  $J$  = 8.1, 0.7 Hz, 1H), 7.77 (d,  $J$  = 2.1 Hz, 1H), 7.63 (dt,  $J$  = 4.2, 2.3 Hz, 1H), 7.55 – 7.51 (m, 1H), 7.46 – 7.43 (m, 3H), 7.39 (ddd,  $J$  = 3.6, 2.4, 1.7 Hz, 2H), 7.36 (d,  $J$  = 2.1 Hz, 1H), 7.08 – 7.00 (m, 5H).  $^{13}\text{C}$  NMR (100 MHz,  $\text{CDCl}_3$ )  $\delta$  150.75, 145.54, 137.38, 134.71, 134.38, 132.19, 131.50, 130.69, 130.05, 129.11, 128.94, 127.98, 127.79, 126.63, 126.01, 125.57, 124.53, 124.14, 123.76, 105.81.  $^{77}\text{Se}$  NMR (76 MHz,  $\text{CDCl}_3$ )  $\delta$  302.58 (s). HRMS (ESI)  $m/z$  calcd for  $\text{C}_{24}\text{H}_{16}\text{OSe}$  [M]: 400.0366; found: 400.0359.

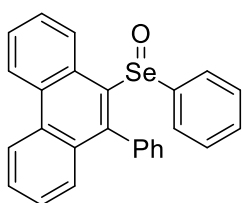

**9-Phenyl-10-(phenylseleninyl)phenanthrene (5):** Orange crystal (0.182 g, 86%); eluent hexane; mp = 172–175 °C;  $^1\text{H}$  NMR (400 MHz,  $\text{CDCl}_3$ )  $\delta$  8.99 (d,  $J$  = 8.2 Hz, 1H), 8.66 (dd,  $J$  = 14.6, 8.3 Hz, 2H), 7.71 – 7.64 (m, 3H), 7.62 – 7.57 (m, 2H), 7.53 (m, 5H), 7.46 – 7.40 (m, 2H), 7.32 (m, 3H).  $^{13}\text{C}$  NMR (100 MHz,  $\text{CDCl}_3$ )  $\delta$  143.71, 141.87, 137.15, 135.40, 131.64, 131.23, 130.59, 130.36, 130.31, 130.15, 129.20, 129.08, 128.59, 128.35, 127.31, 127.23, 127.05, 126.59, 126.11, 122.65, 122.59 (Overlapping peaks are present).  $^{77}\text{Se}$  NMR (76 MHz,  $\text{CDCl}_3$ )  $\delta$  895.08 (s). HRMS (ESI)  $m/z$  calcd for  $\text{C}_{26}\text{H}_{18}\text{OSe}$  [M]: 426.0523; found: 426.0656.

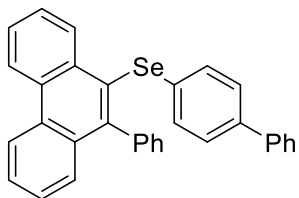

**[1,1'-biphenyl]-4-yl(10-phenylphenanthren-9-yl)selane (6):** Yellow liquid (0.095 g, 65%); eluent hexane;  $^1\text{H}$  NMR (400 MHz,  $\text{CDCl}_3$ )  $\delta$  8.86 – 8.76 (m, 3H), 7.72 (dd,  $J$  = 3.2, 1.8 Hz, 2H), 7.63 (d,  $J$  = 1.2 Hz, 1H), 7.54 – 7.53 (m, 1H), 7.52 – 7.47 (m, 6H), 7.40 (dd,  $J$  = 8.2, 6.8 Hz, 2H), 7.34 – 7.30 (m, 5H), 7.17 – 7.12 (m, 2H).  $^{13}\text{C}$  NMR (100 MHz,  $\text{CDCl}_3$ )  $\delta$  146.89, 141.94, 140.40, 138.37, 133.41, 132.43, 132.15, 131.10, 130.73, 130.62, 129.67, 129.44, 128.91, 128.69, 127.98, 127.66, 127.53, 127.50, 127.33, 127.09, 127.07, 126.76, 126.66, 122.73, 122.57 (Overlapping peaks are present).  $^{77}\text{Se}$  NMR (76 MHz,  $\text{CDCl}_3$ )  $\delta$  319.82 (s). Anal calcd for  $\text{C}_{32}\text{H}_{22}\text{Se}$ : C, 79.17; H, 4.57; found C, 79.84; H, 4.06.

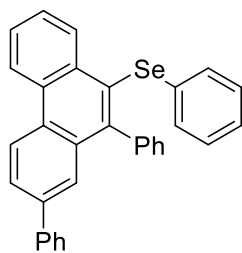

**(2,10-diphenylphenanthren-9-yl)(phenyl)selane (7):** Yellow solid (0.080 g, 55%); eluent hexane; mp = 73-75 °C;  $^1\text{H}$  NMR (400 MHz,  $\text{CDCl}_3$ )  $\delta$  8.76 (ddd,  $J$  = 18.5, 9.3, 4.8 Hz, 3H), 7.95 (dd,  $J$  = 8.6, 2.0 Hz, 1H), 7.71 – 7.67 (m, 2H), 7.60 – 7.57 (m, 1H), 7.57 – 7.49 (m, 3H), 7.45 – 7.38 (m, 5H), 7.35 (dd,  $J$  = 4.9, 3.6 Hz, 1H), 7.28 (d,  $J$  = 2.4 Hz, 1H), 7.23 (s, 1H), 7.05 (d,  $J$  = 4.2 Hz, 4H).  $^{13}\text{C}$  NMR (101 MHz,  $\text{CDCl}_3$ )  $\delta$  144.05, 141.82, 140.65, 140.57, 139.36, 134.25, 132.53, 130.72, 130.58, 130.23, 130.23, 129.71, 129.22, 128.94, 128.85, 128.20, 128.04, 127.60, 127.45, 127.30, 127.15, 126.95, 126.68, 125.54, 123.20, 122.76.  $^{77}\text{Se}$  NMR (76 MHz,  $\text{CDCl}_3$ )  $\delta$  324.04 (s). Anal calcd for  $\text{C}_{32}\text{H}_{22}\text{Se}$ : C, 79.17; H, 4.57; found C, 79.95; H, 4.04.

## 12. References

1. G. W. T. M. J. Frisch, H. B. Schlegel, G. E. Scuseria,, J. R. C. M. A. Robb, G. Scalmani, V. Barone, B. Mennucci,, H. N. G. A. Petersson, M. Caricato, X. Li, H. P. Hratchian, J. B. A. F. Izmaylov, G. Zheng, J. L. Sonnenberg, M. Hada,, K. T. M. Ehara, R. Fukuda, J. Hasegawa, M. Ishida, T. Nakajima, O. K. Y. Honda, H. Nakai, T. Vreven, J. A. Montgomery, Jr., F. O. J. E. Peralta, M. Bearpark, J. J. Heyd, E. Brothers, V. N. S. K. N. Kudin, T. Keith, R. Kobayashi, J. Normand, A. R. K. Raghavachari, J. C. Burant, S. S. Iyengar, J. Tomasi, N. R. M. Cossi, J. M. Millam, M. Klene, J. E. Knox, J. B. Cross, C. A. V. Bakken, J. Jaramillo, R. Gomperts, R. E. Stratmann, A. J. A. O. Yazyev, R. Cammi, C. Pomelli, J. W. Ochterski, K. M. R. L. Martin, V. G. Zakrzewski, G. A. Voth, J. J. D. P. Salvador, S. Dapprich, A. D. Daniels, J. B. F. O. Farkas, J. V. Ortiz, J. Cioslowski, and and D. J. Fox, Gaussian 09, Revision C.01, Gaussian, Inc., Wallingford CT, 2010.
2. R. Peverati and D. G. Truhlar, *The Journal of Physical Chemistry Letters*, 2011, **2**, 2810-2817.
3. S. Chiodo, N. Russo and E. Sicilia, *The Journal of chemical physics*, 2006, **125**, 104107-104115.
4. V. Barone and M. Cossi, *The Journal of Physical Chemistry A*, 1998, **102**, 1995-2001.
5. N. Mukherjee and T. Chatterjee, *Green Chem.*, 2021, **23**, 10006–10013.
6. D. Singh, A. M. Deobald, L. R. S. Camargo, G. Tabarelli, O. E. D. Rodrigues and A. L. Braga, *Org. Lett.*, 2010, **12**, 3288–3291.

7. S. An, Z. Zhang and P. Li, *Eur. J. Org. Chem.*, 2021, 3059-3070
8. N. Mukherjee and T. Chatterjee, *J. Org. Chem.*, 2021, **86**, 7881–7890
9. S. An, Z. Zhang, P. Li, *Eur. J. Org. Chem.* 2021, **21**, 3059–3070.
10. T. B. Grimaldi, G. Lutz, D. F. Back and G. Zeni, *Org. Biomol. Chem.* 2016, **14**, 10415-10426.

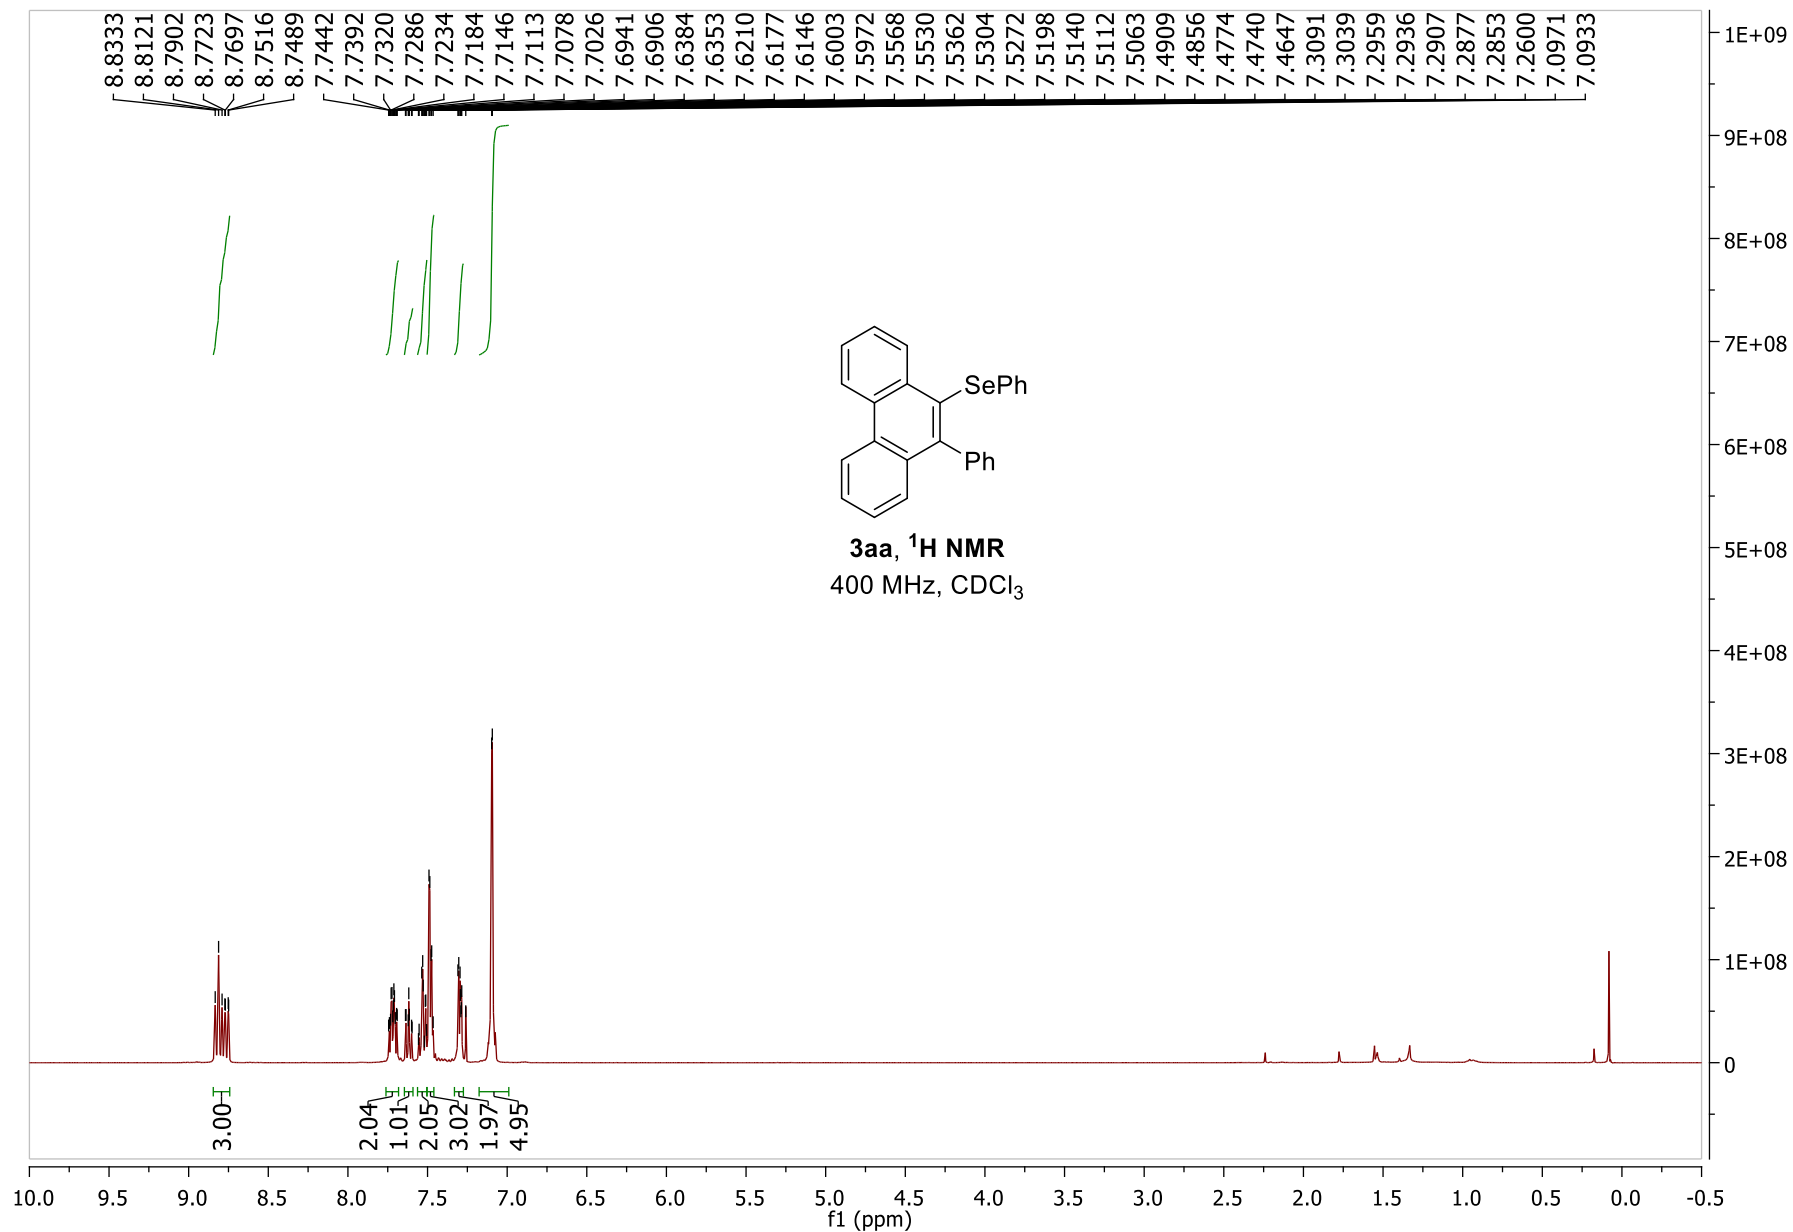

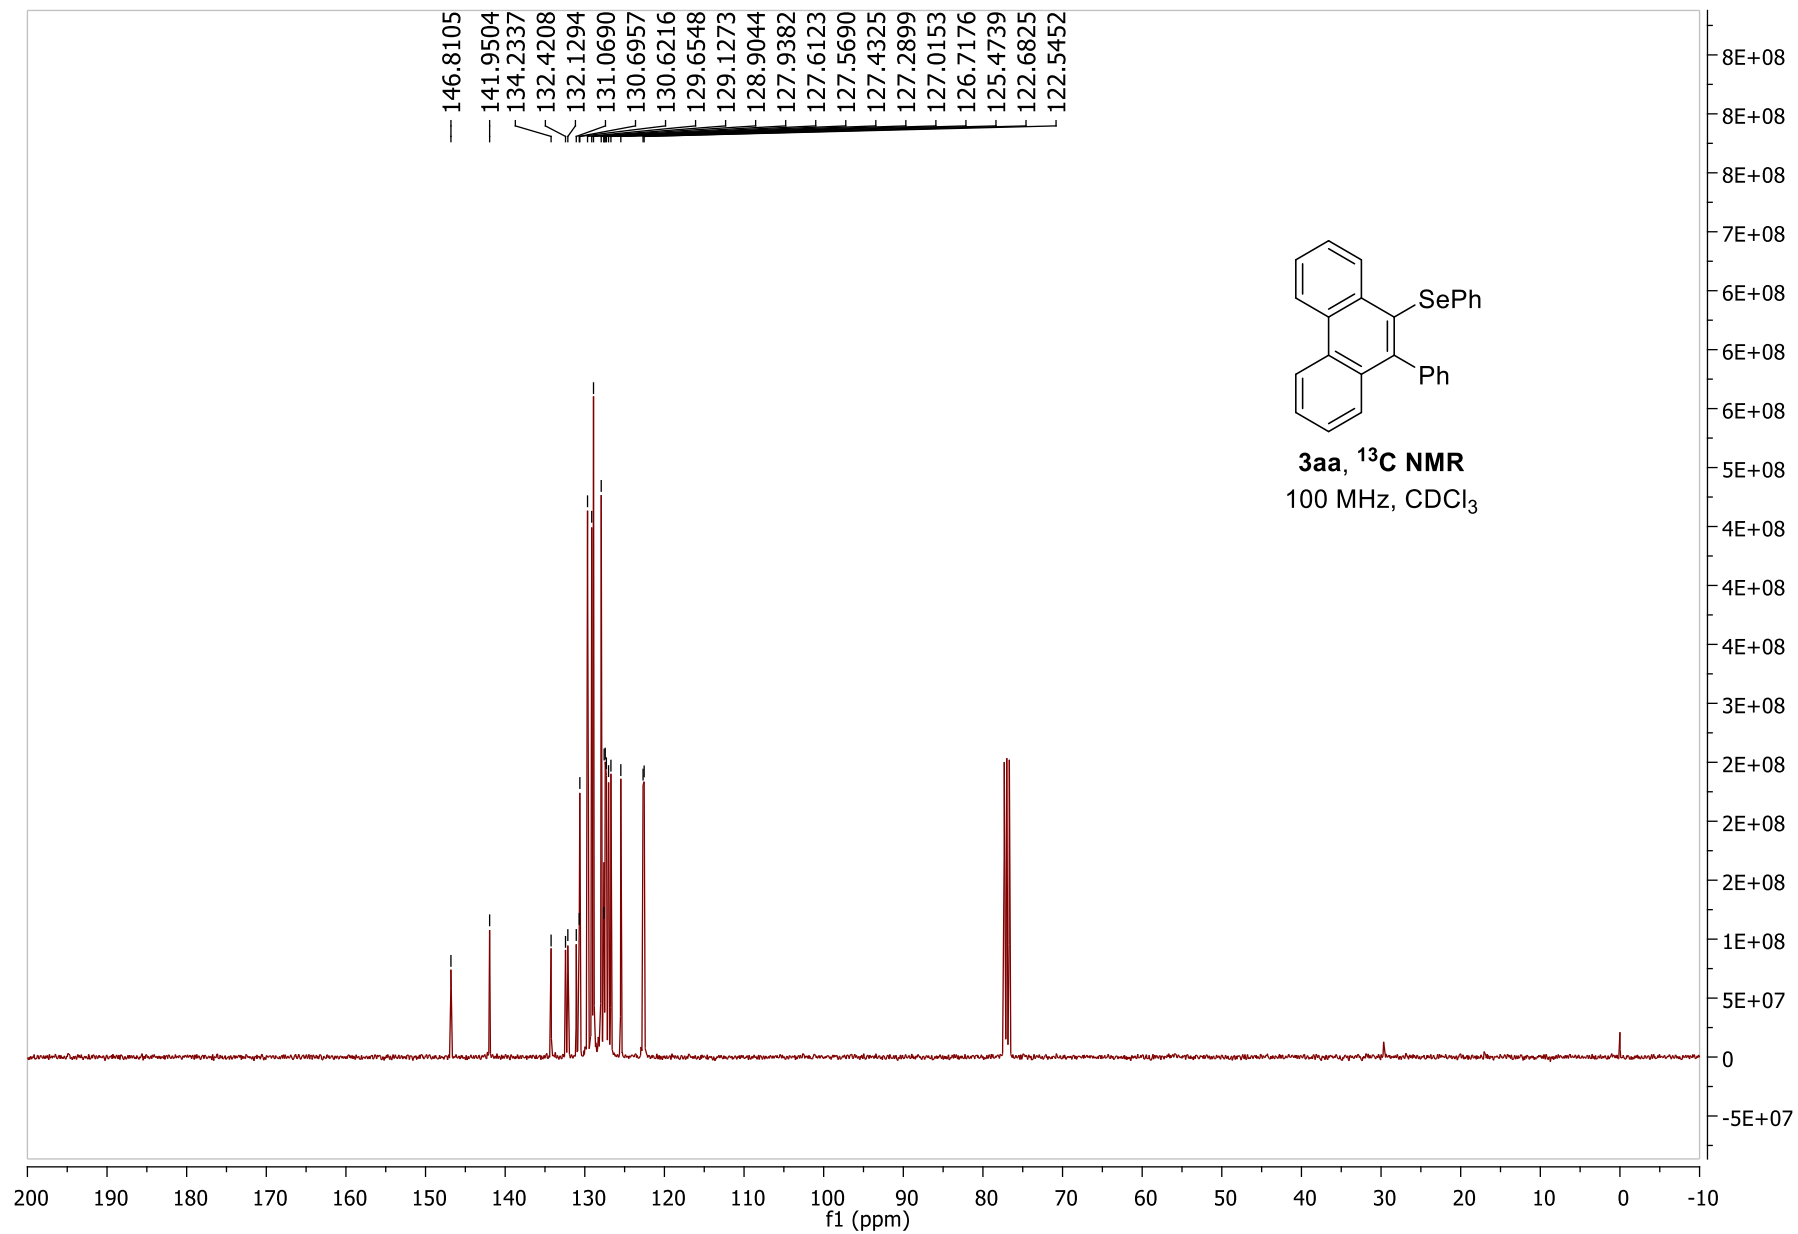

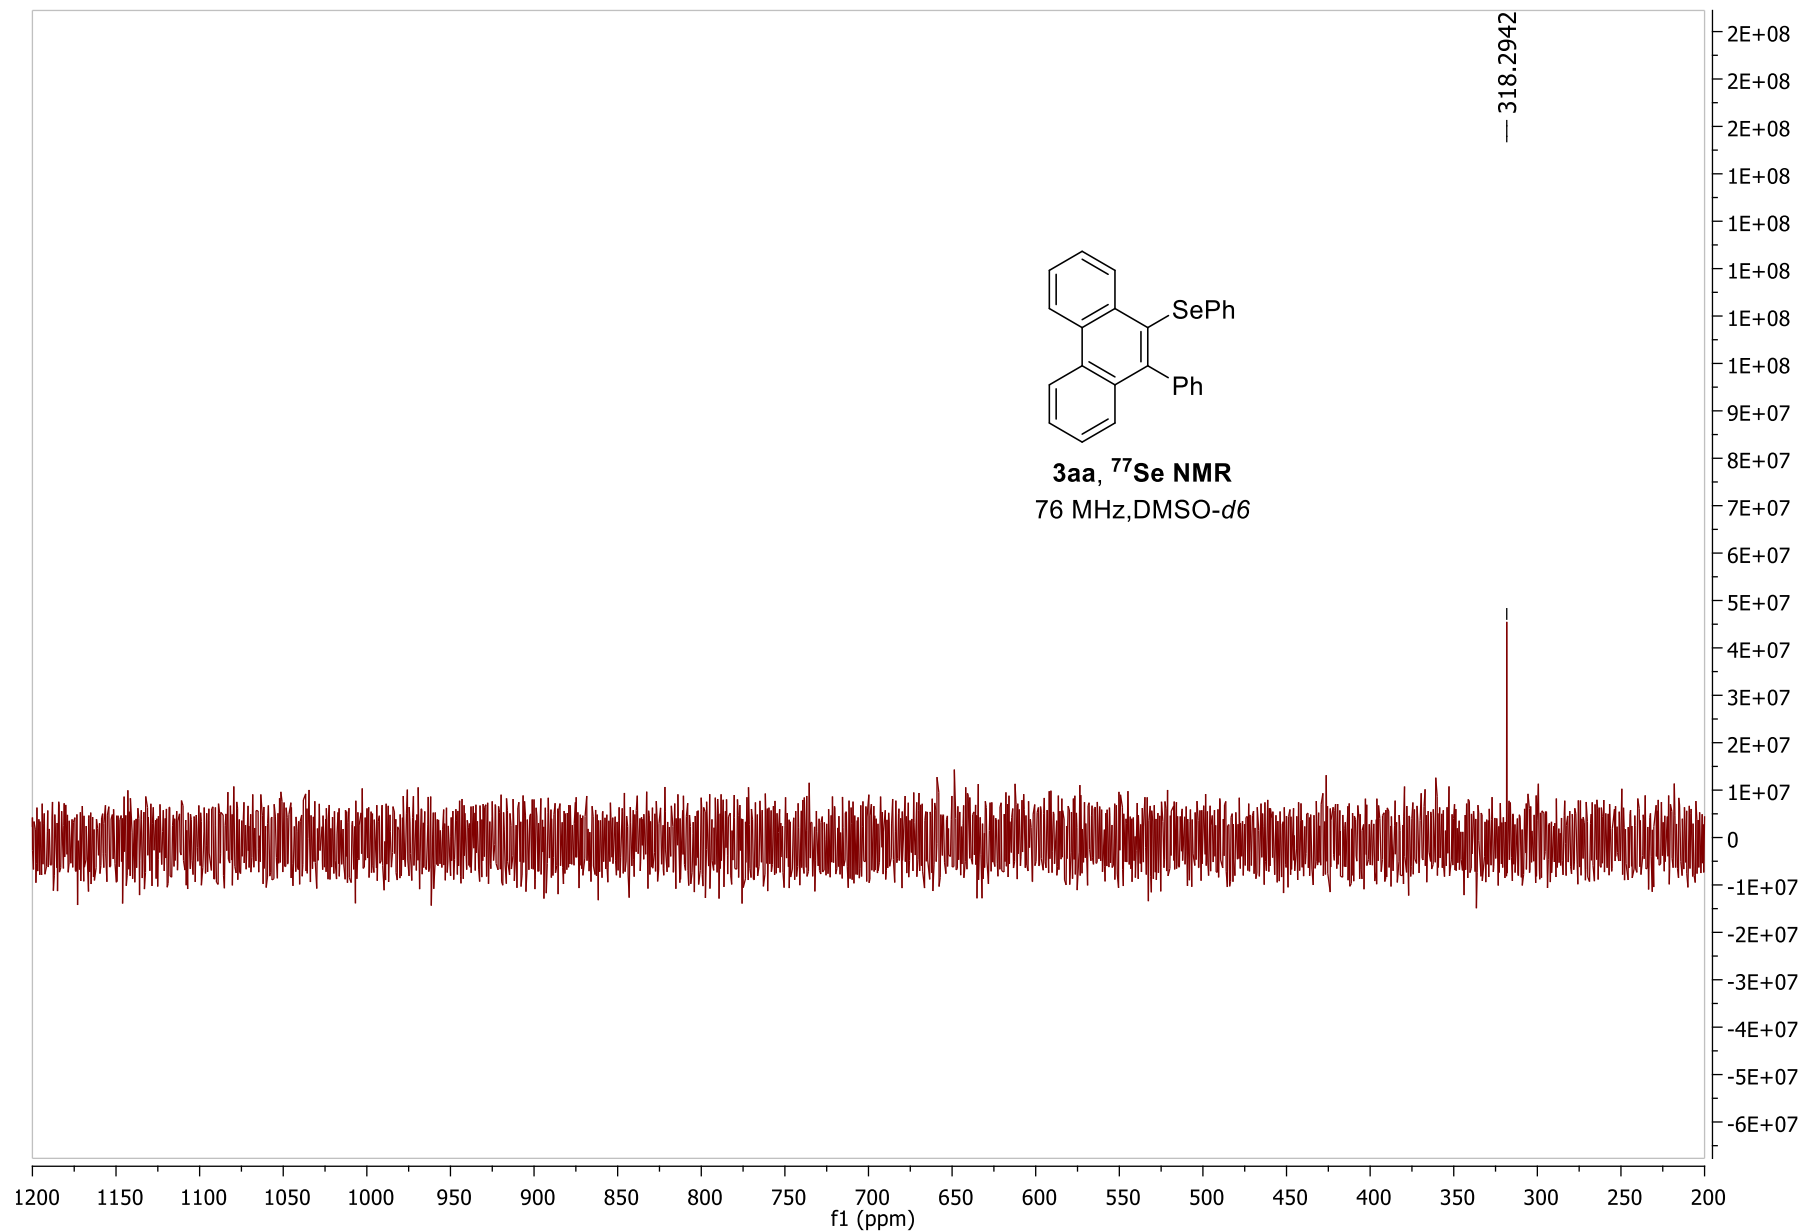

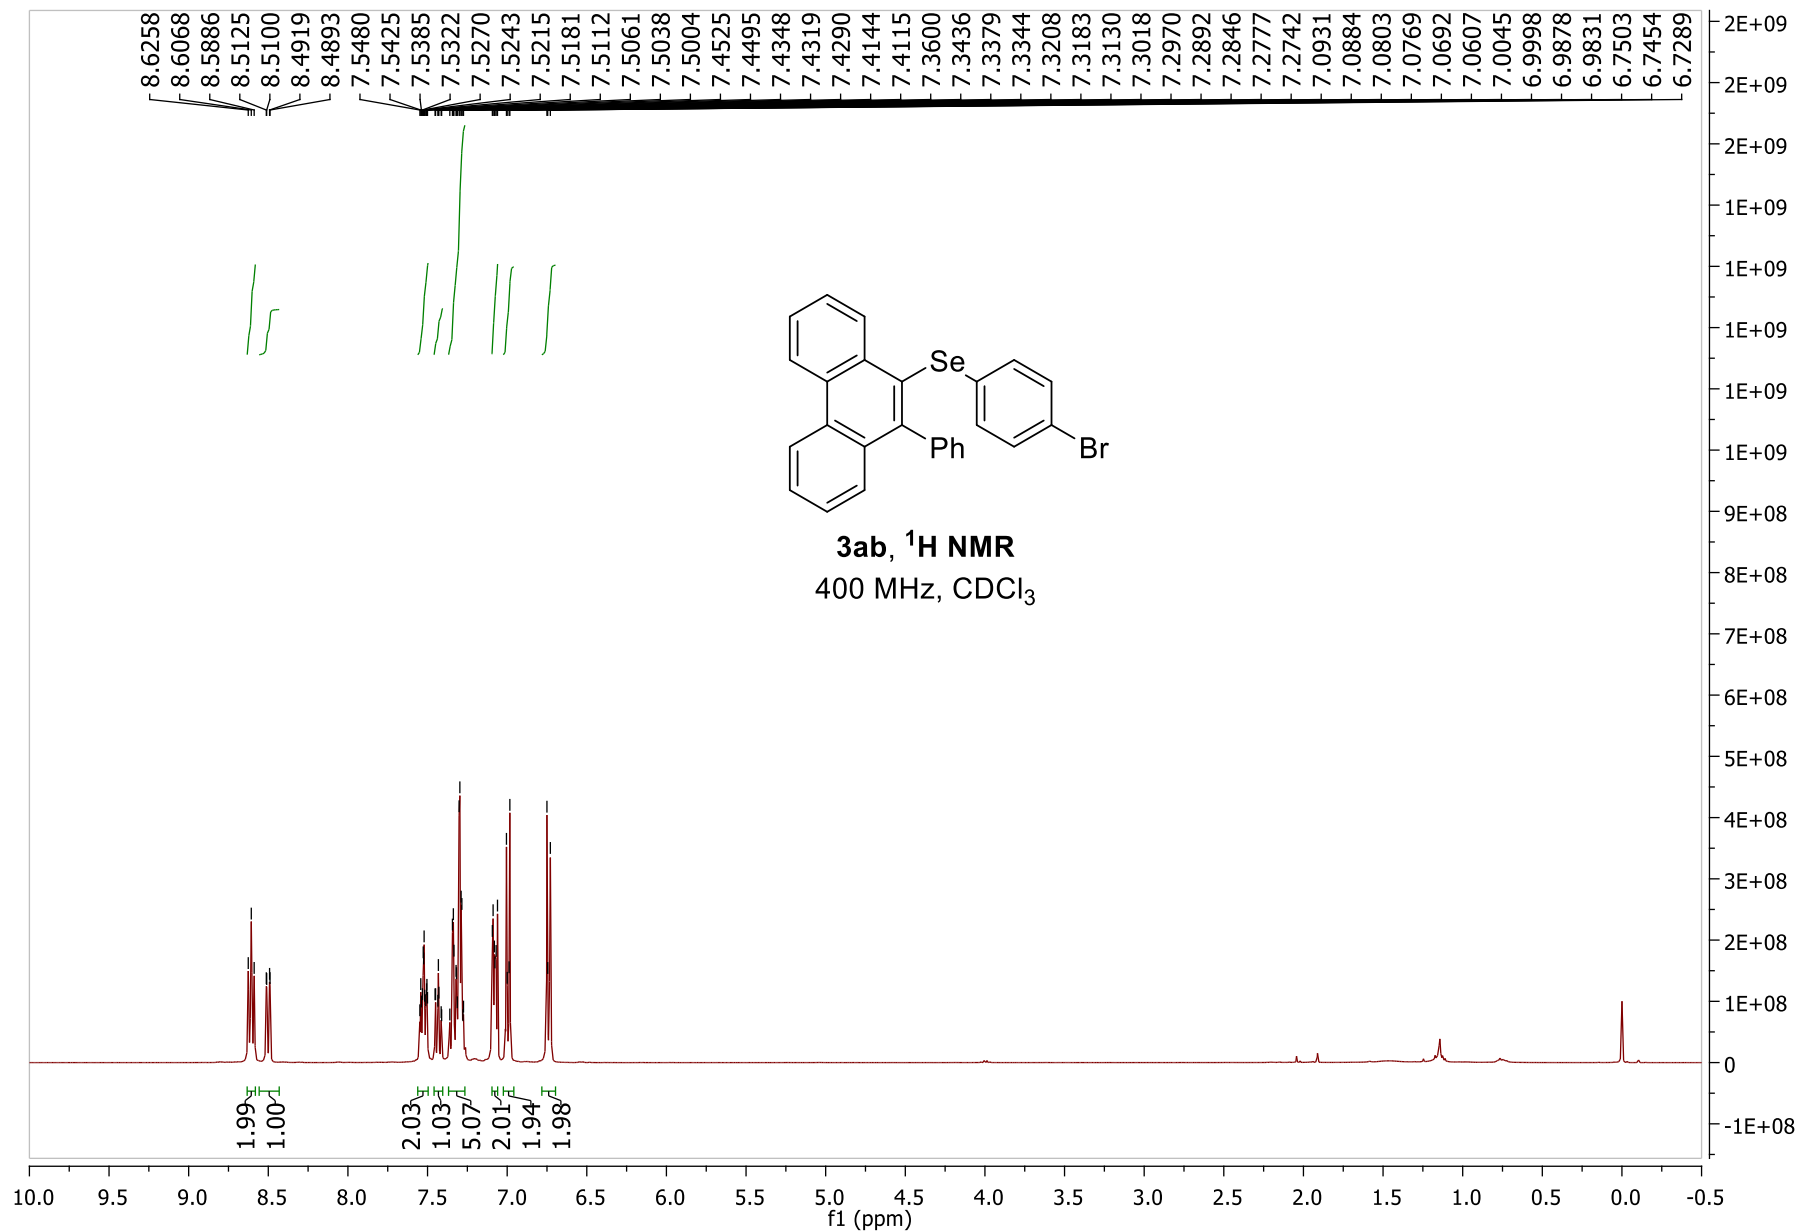

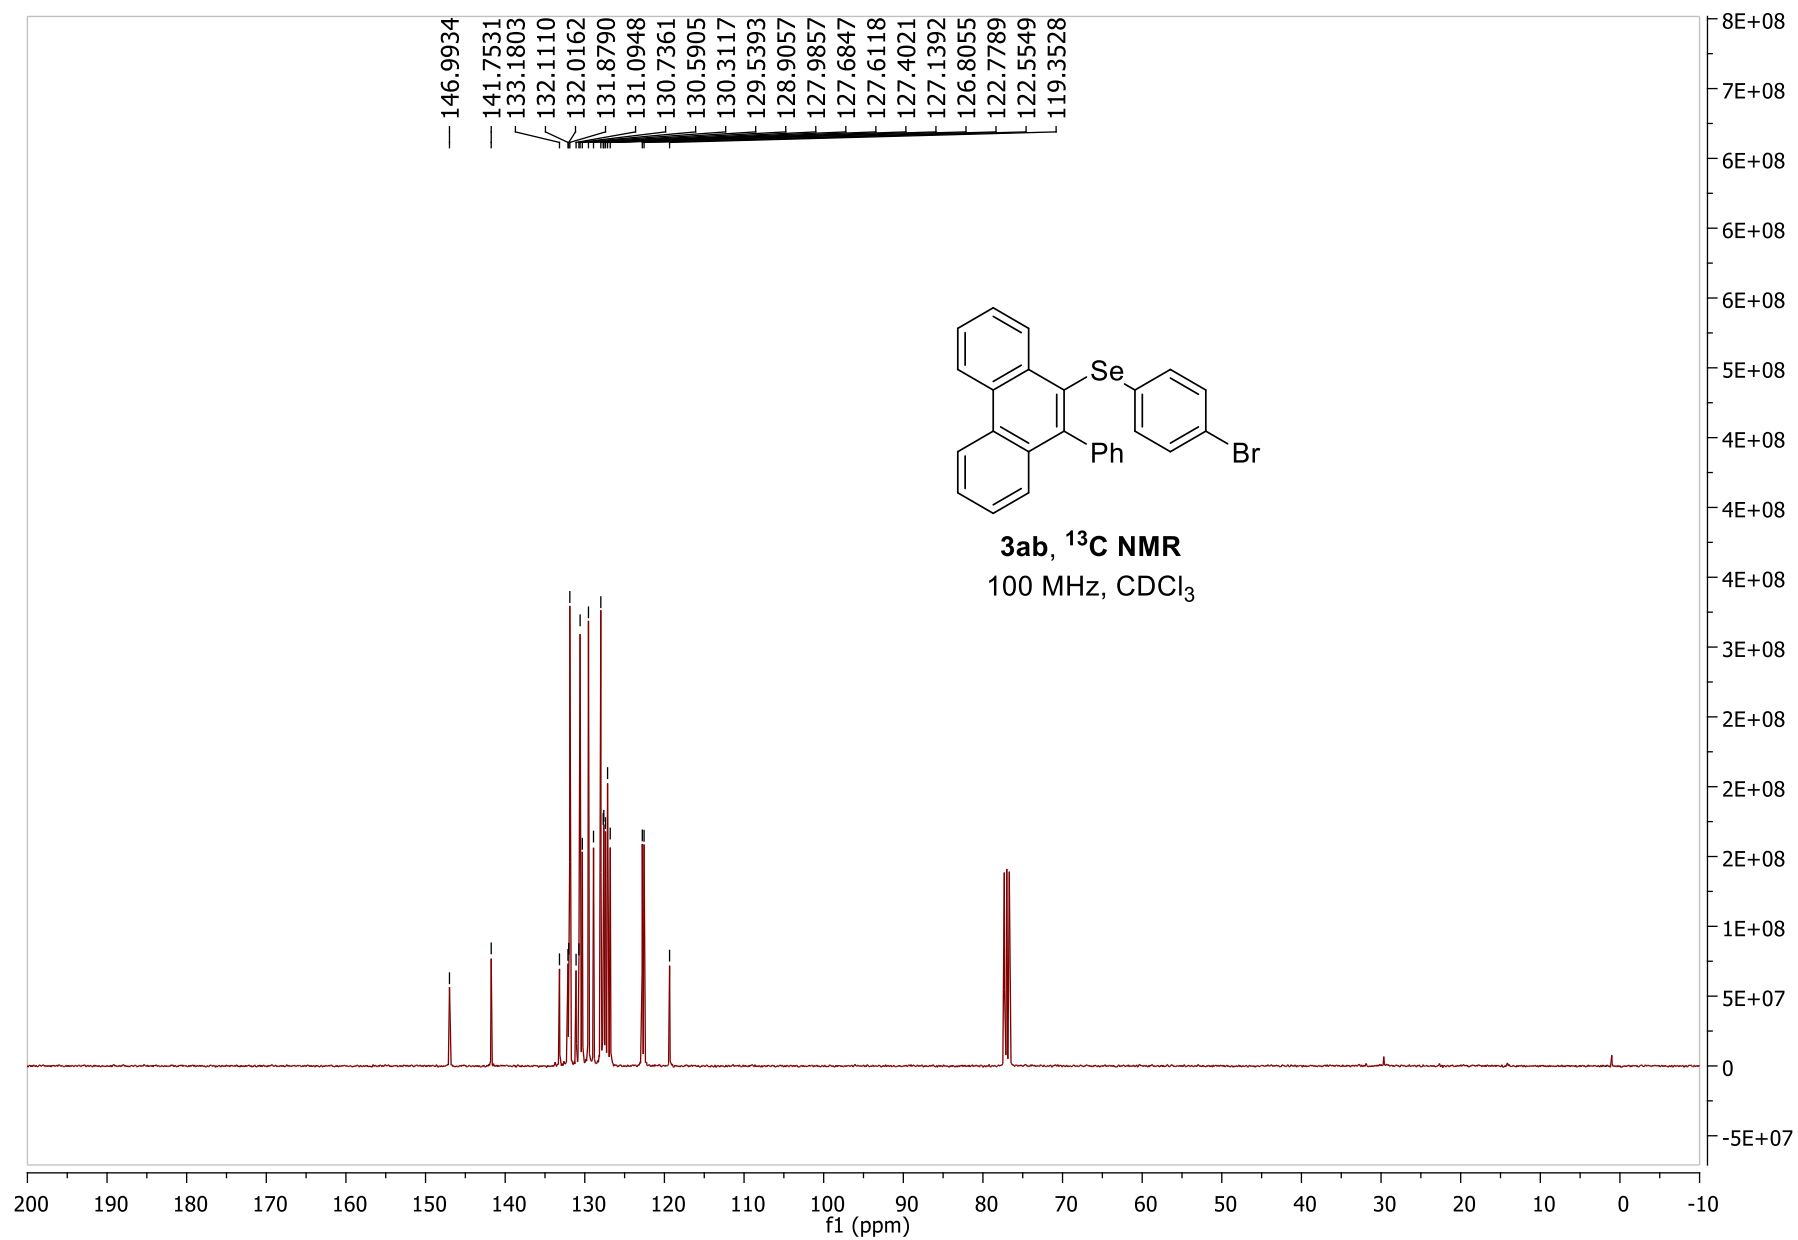

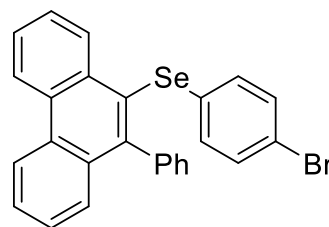

**3ab,  $^{77}\text{Se}$  NMR**  
76 MHz,  $\text{CDCl}_3$

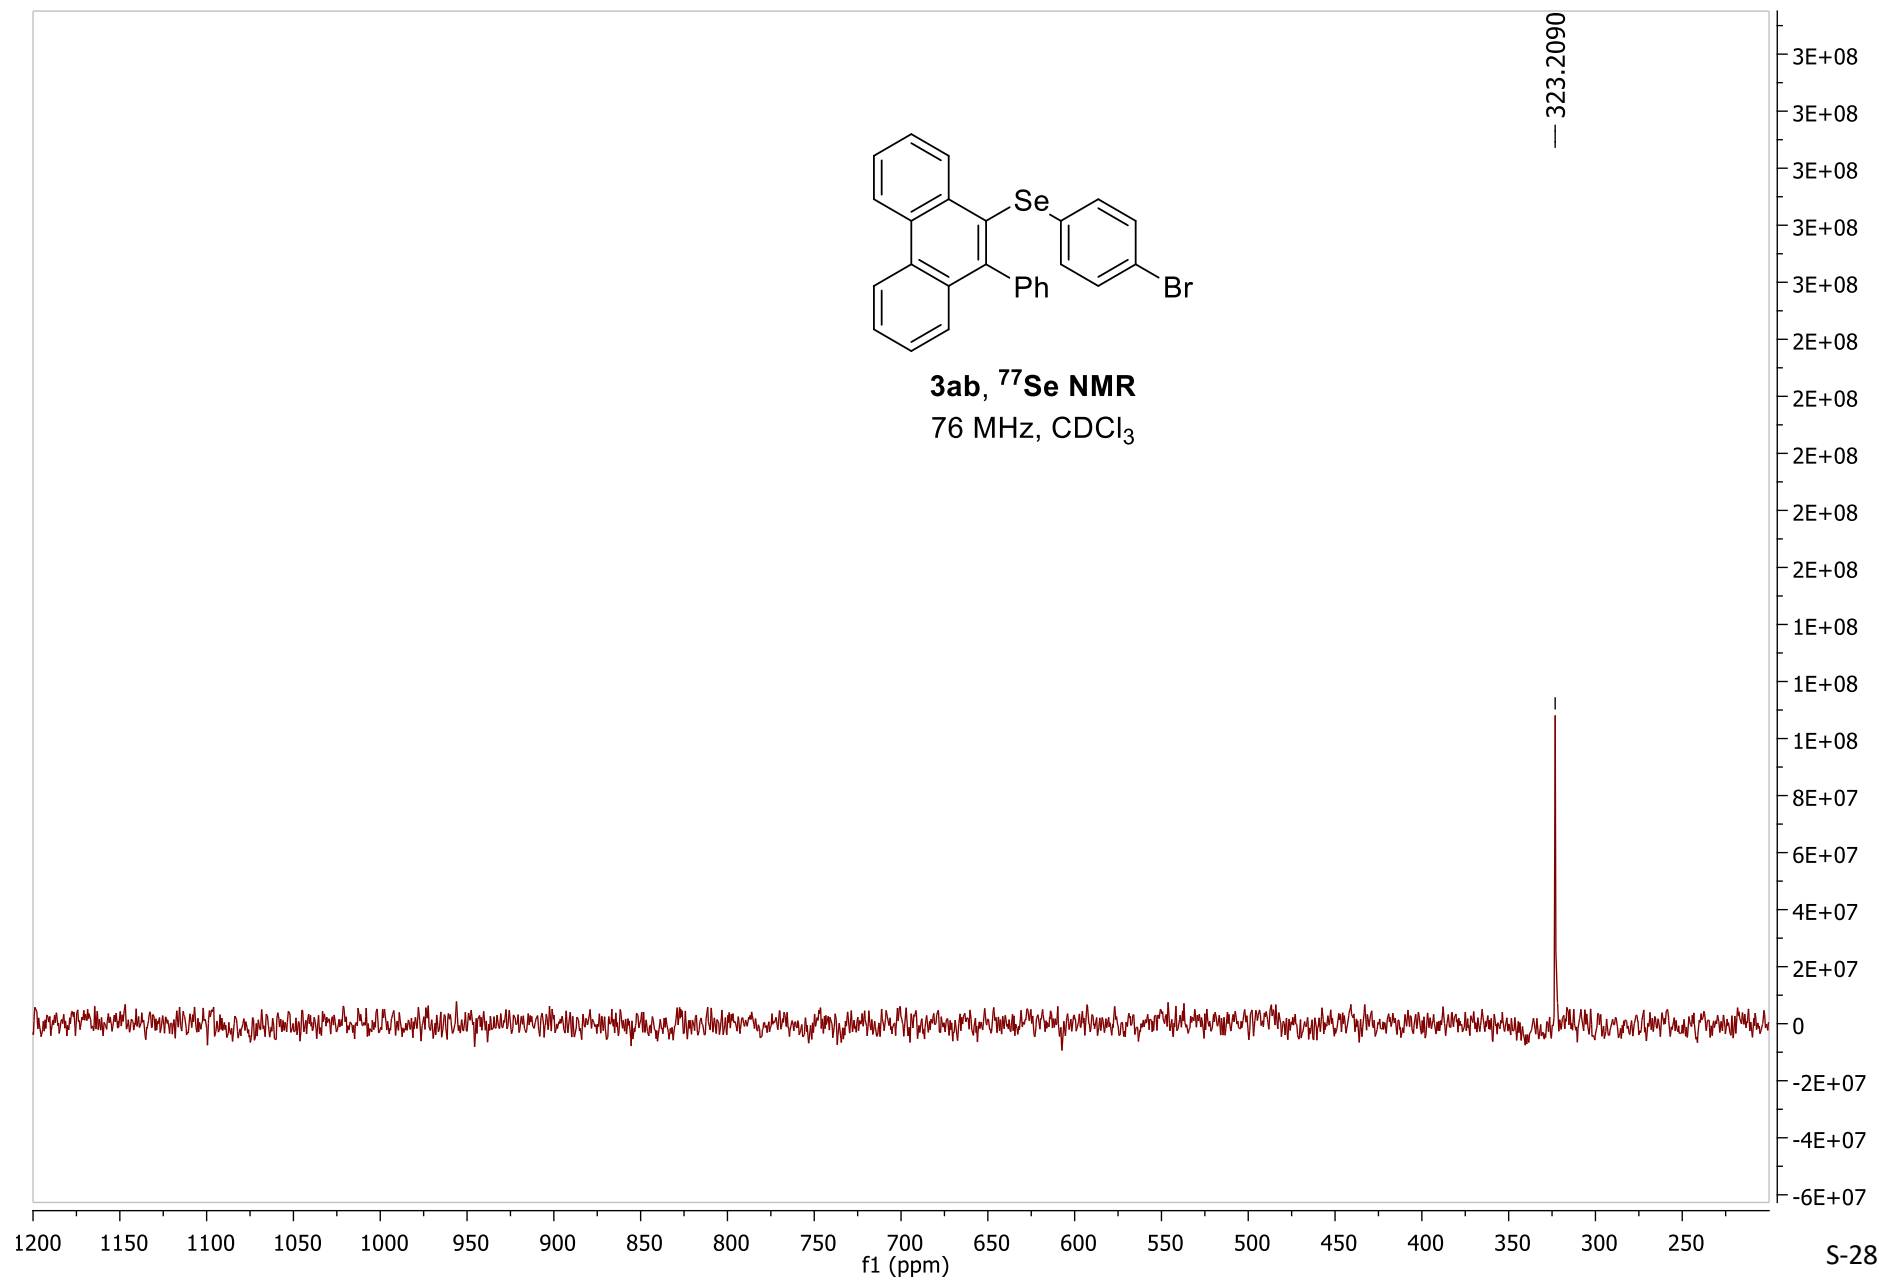

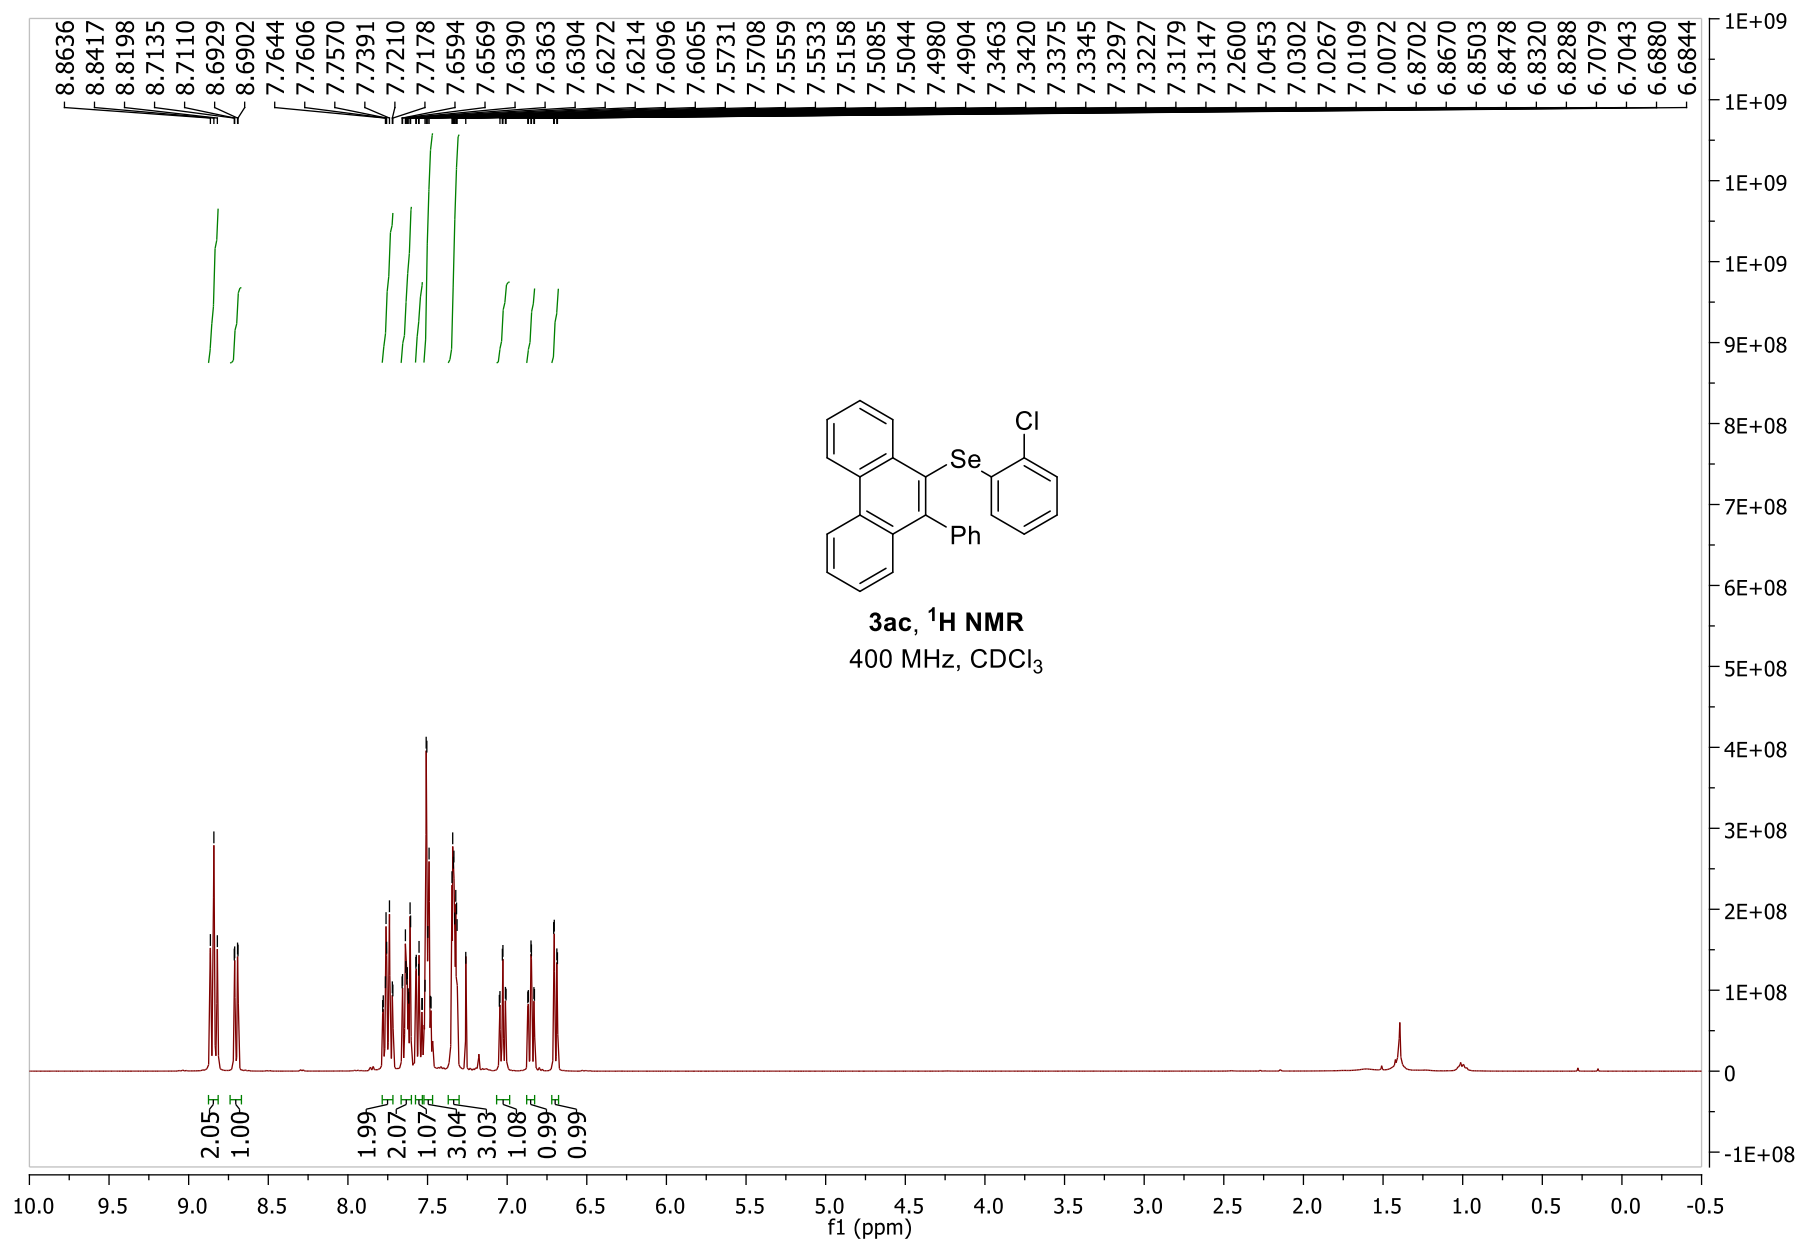

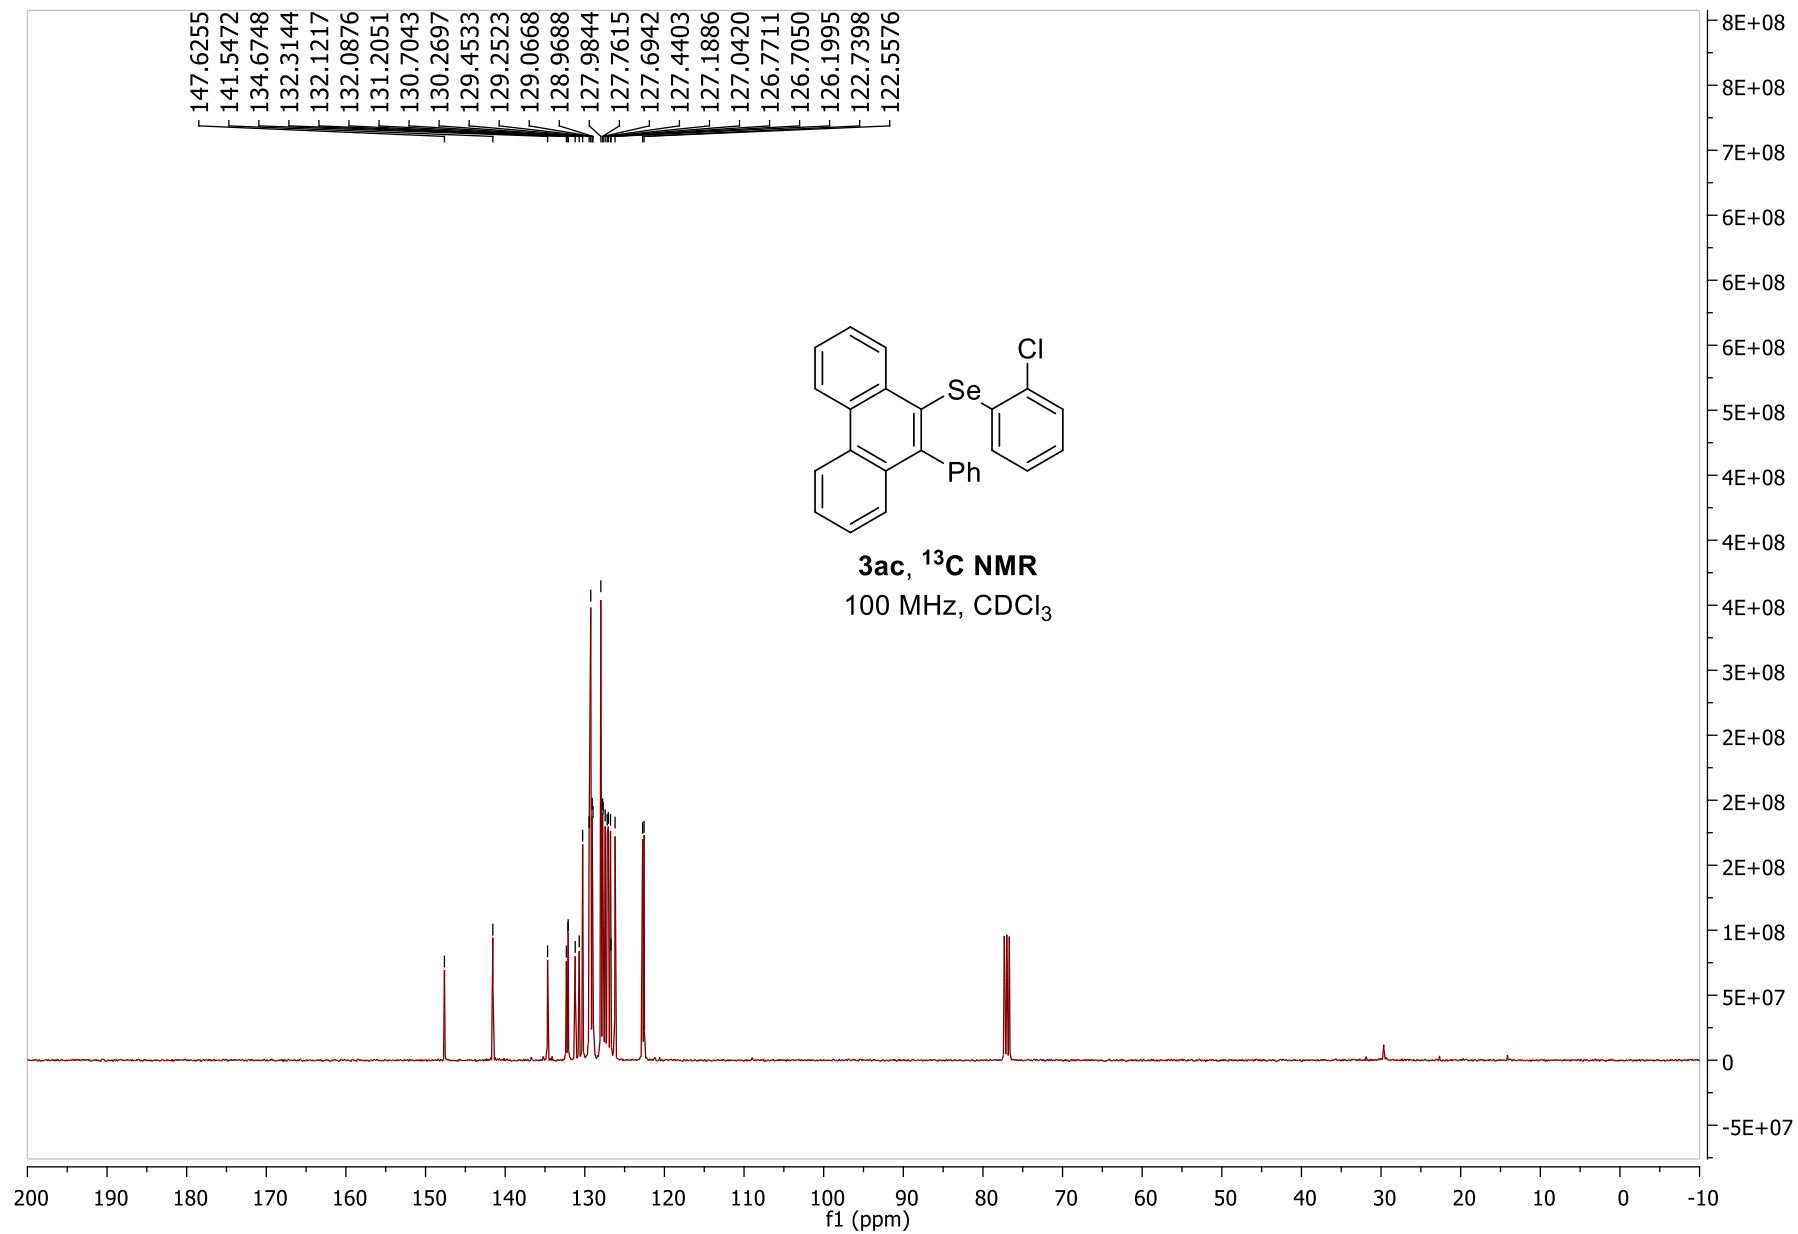

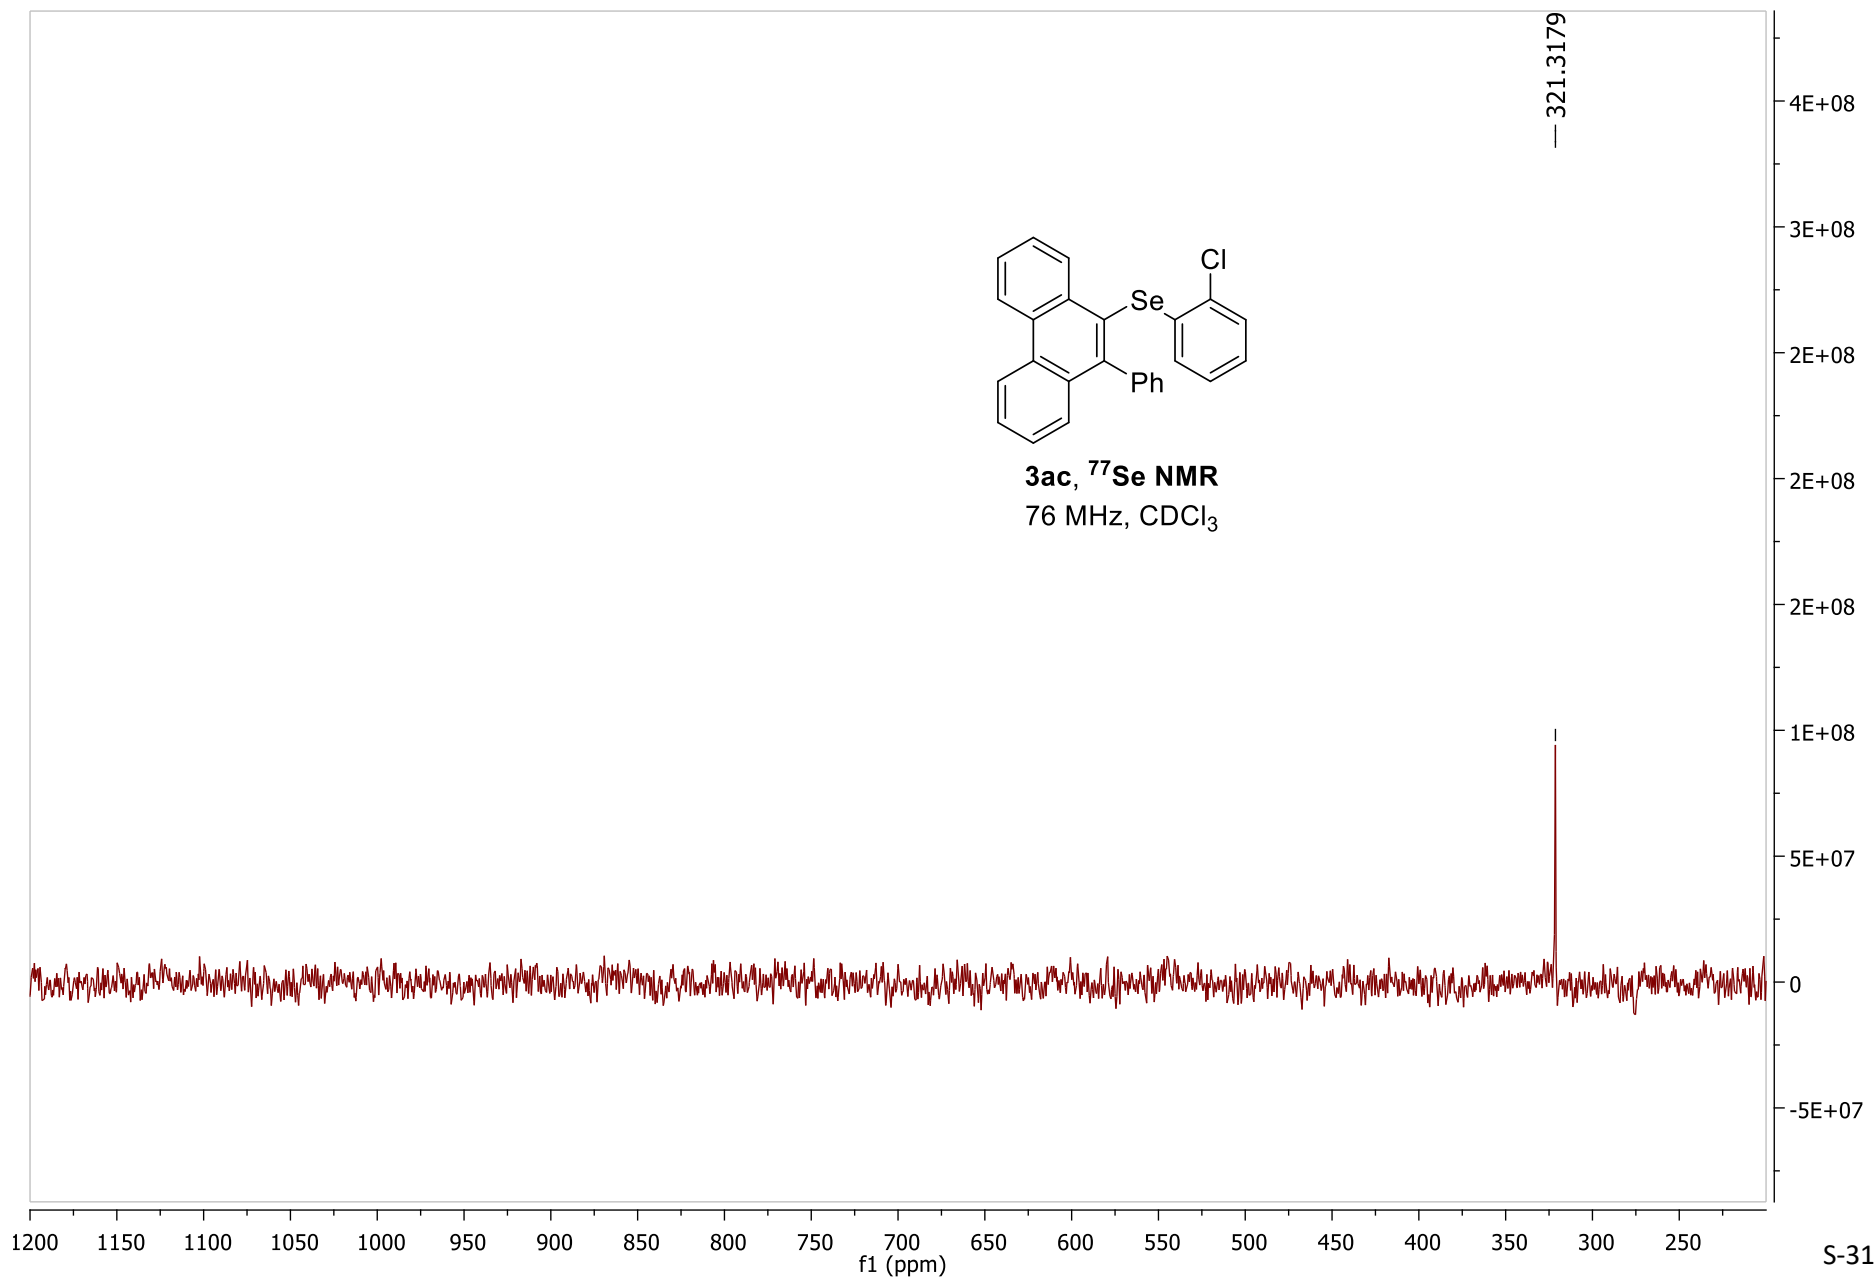

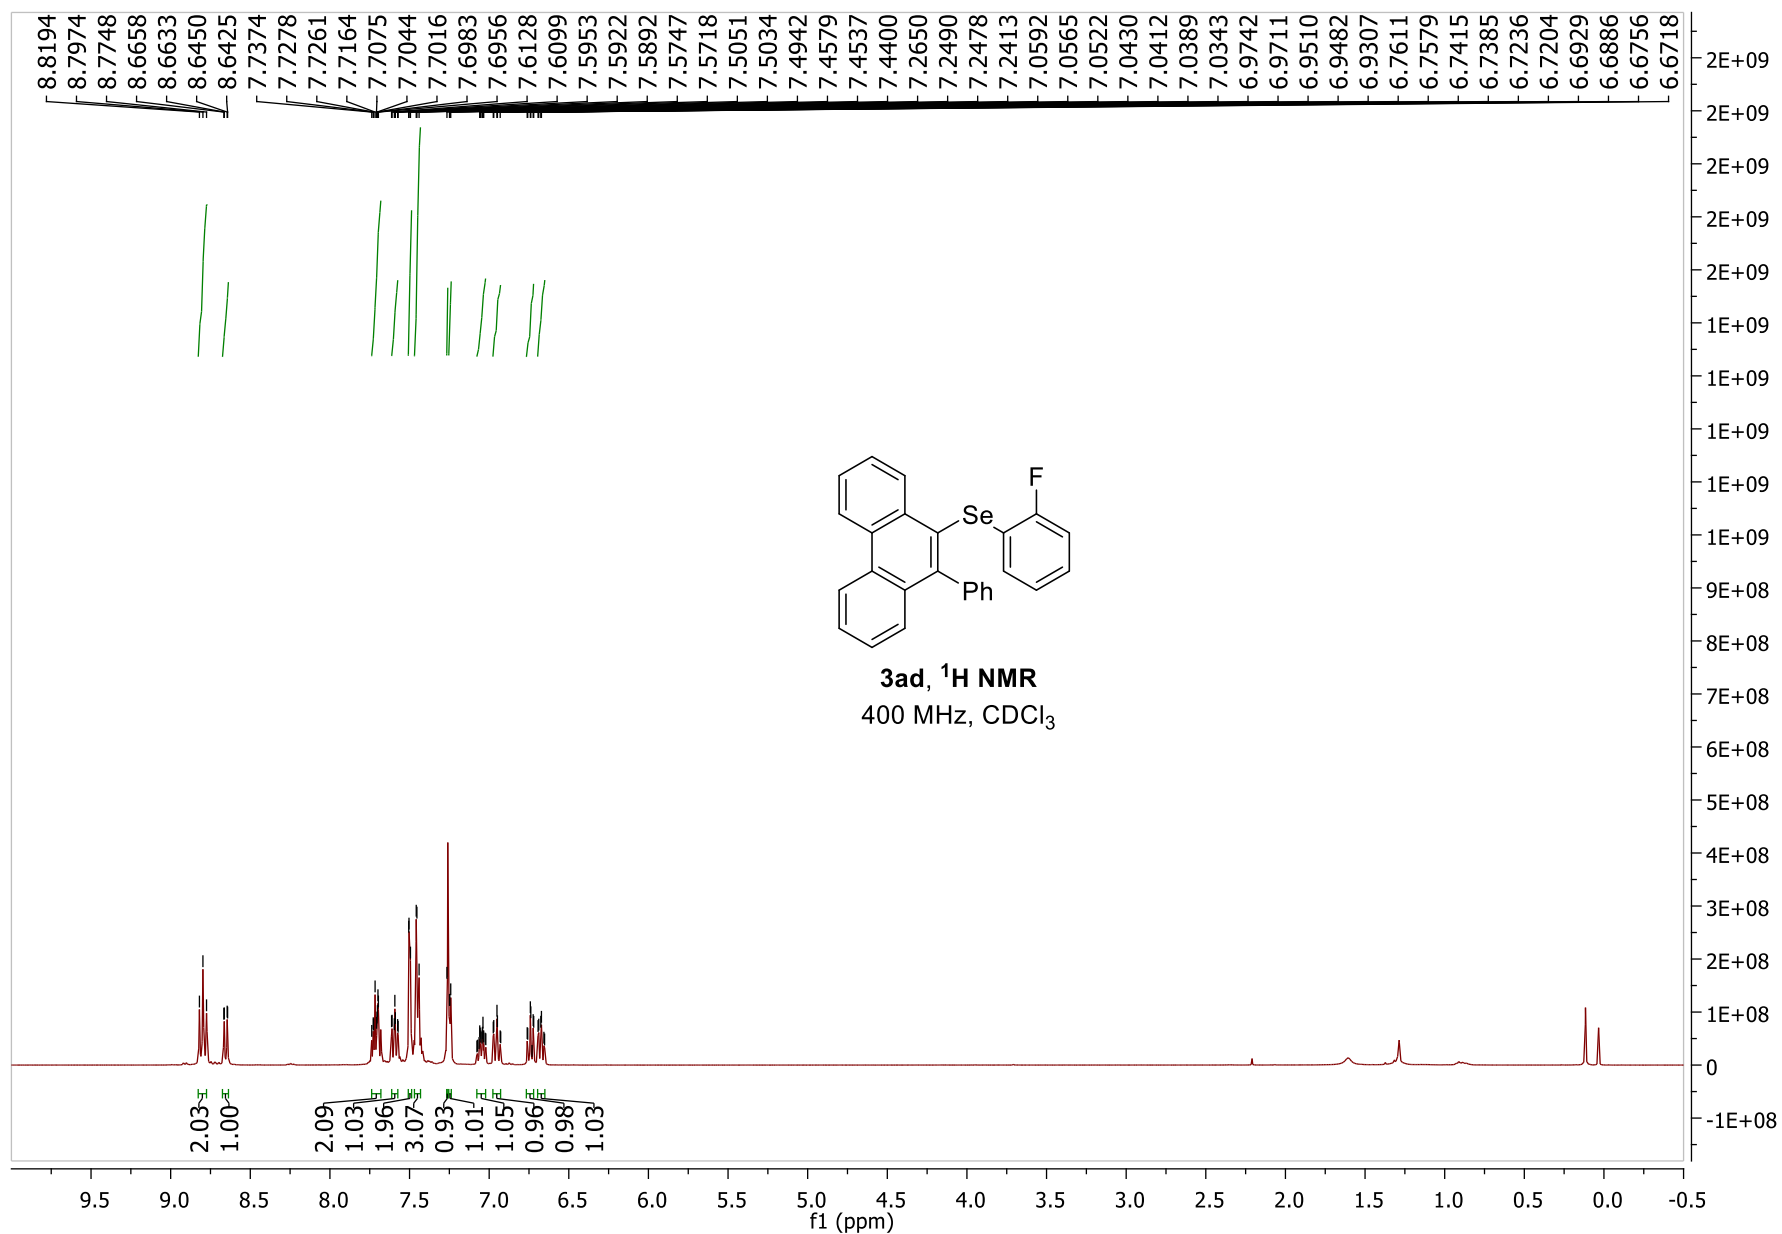

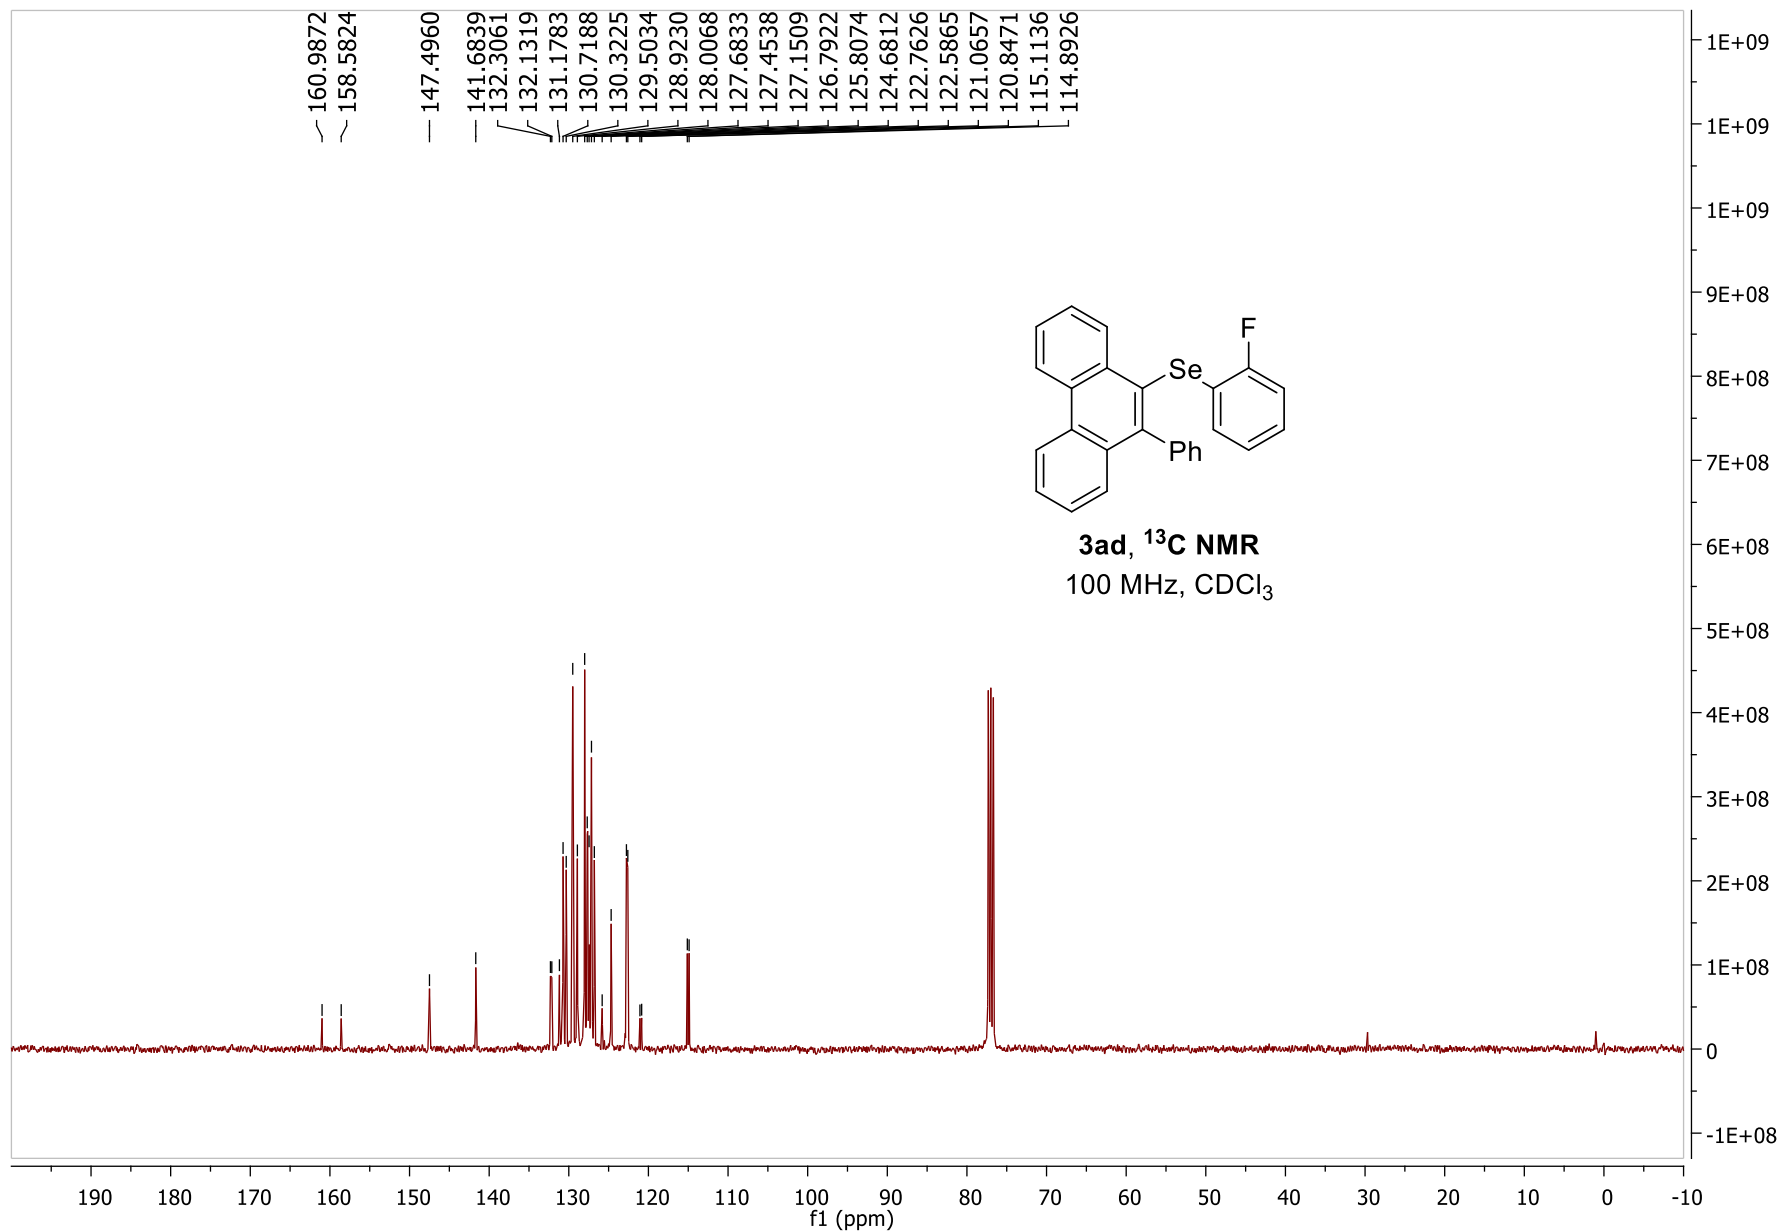

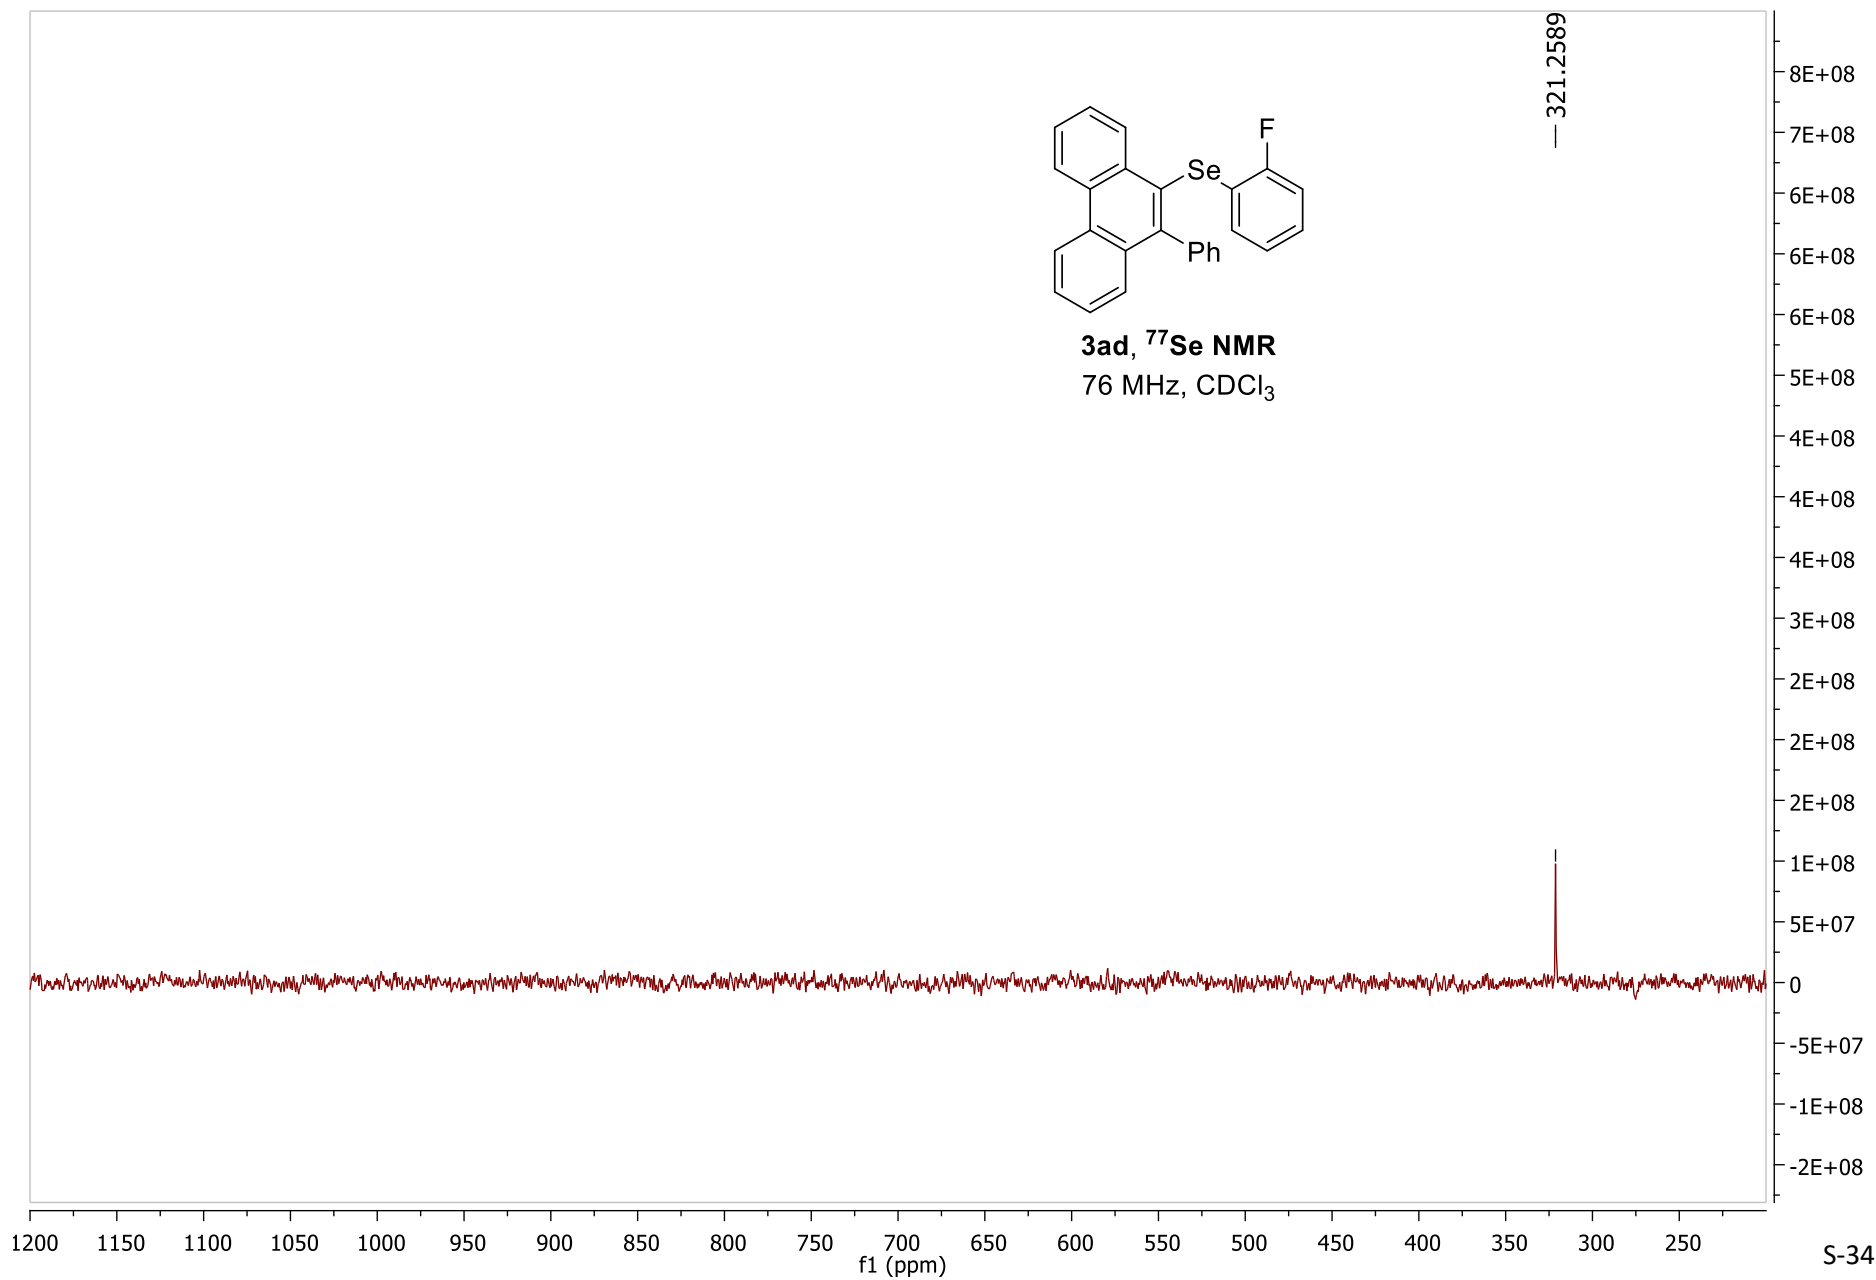

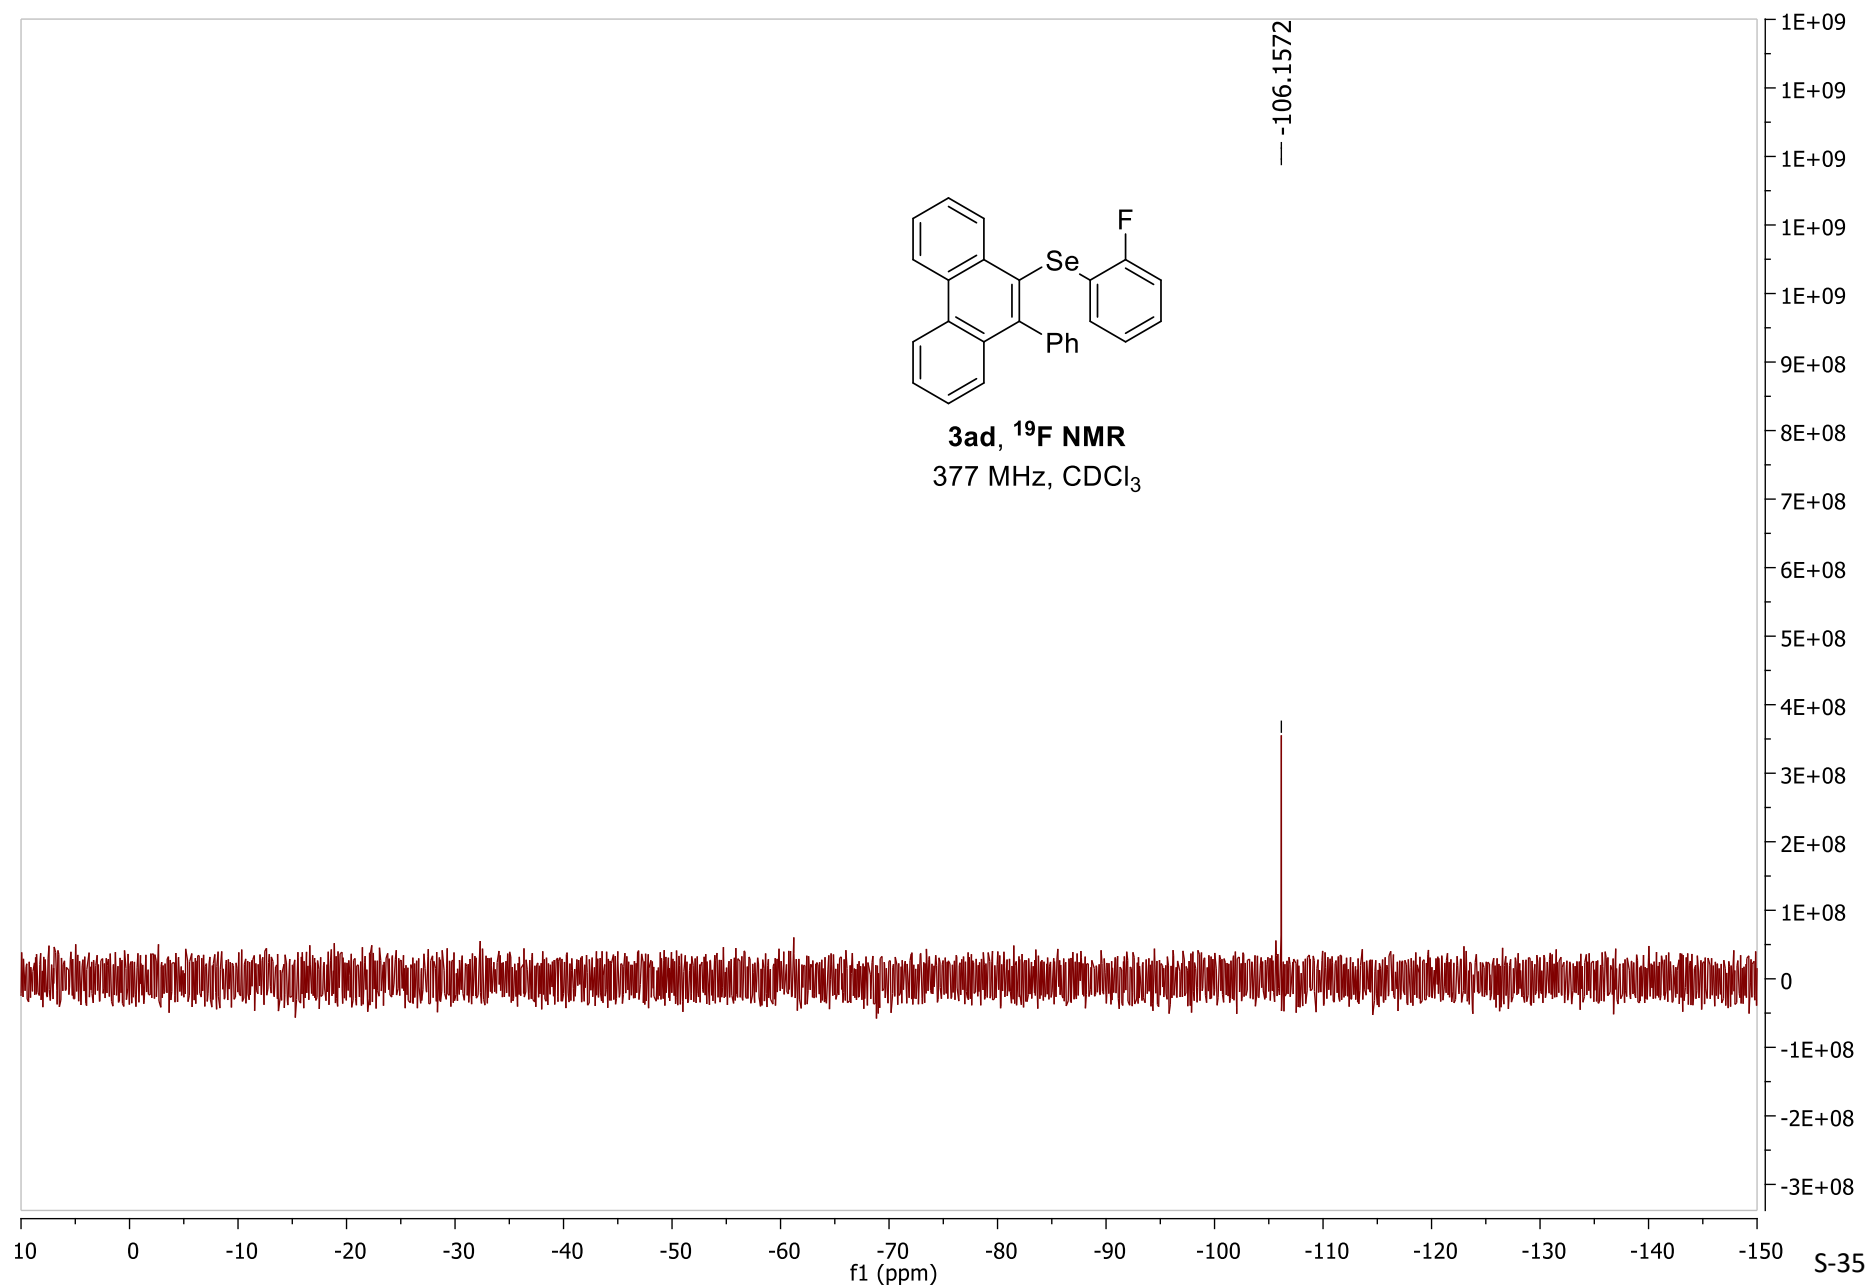

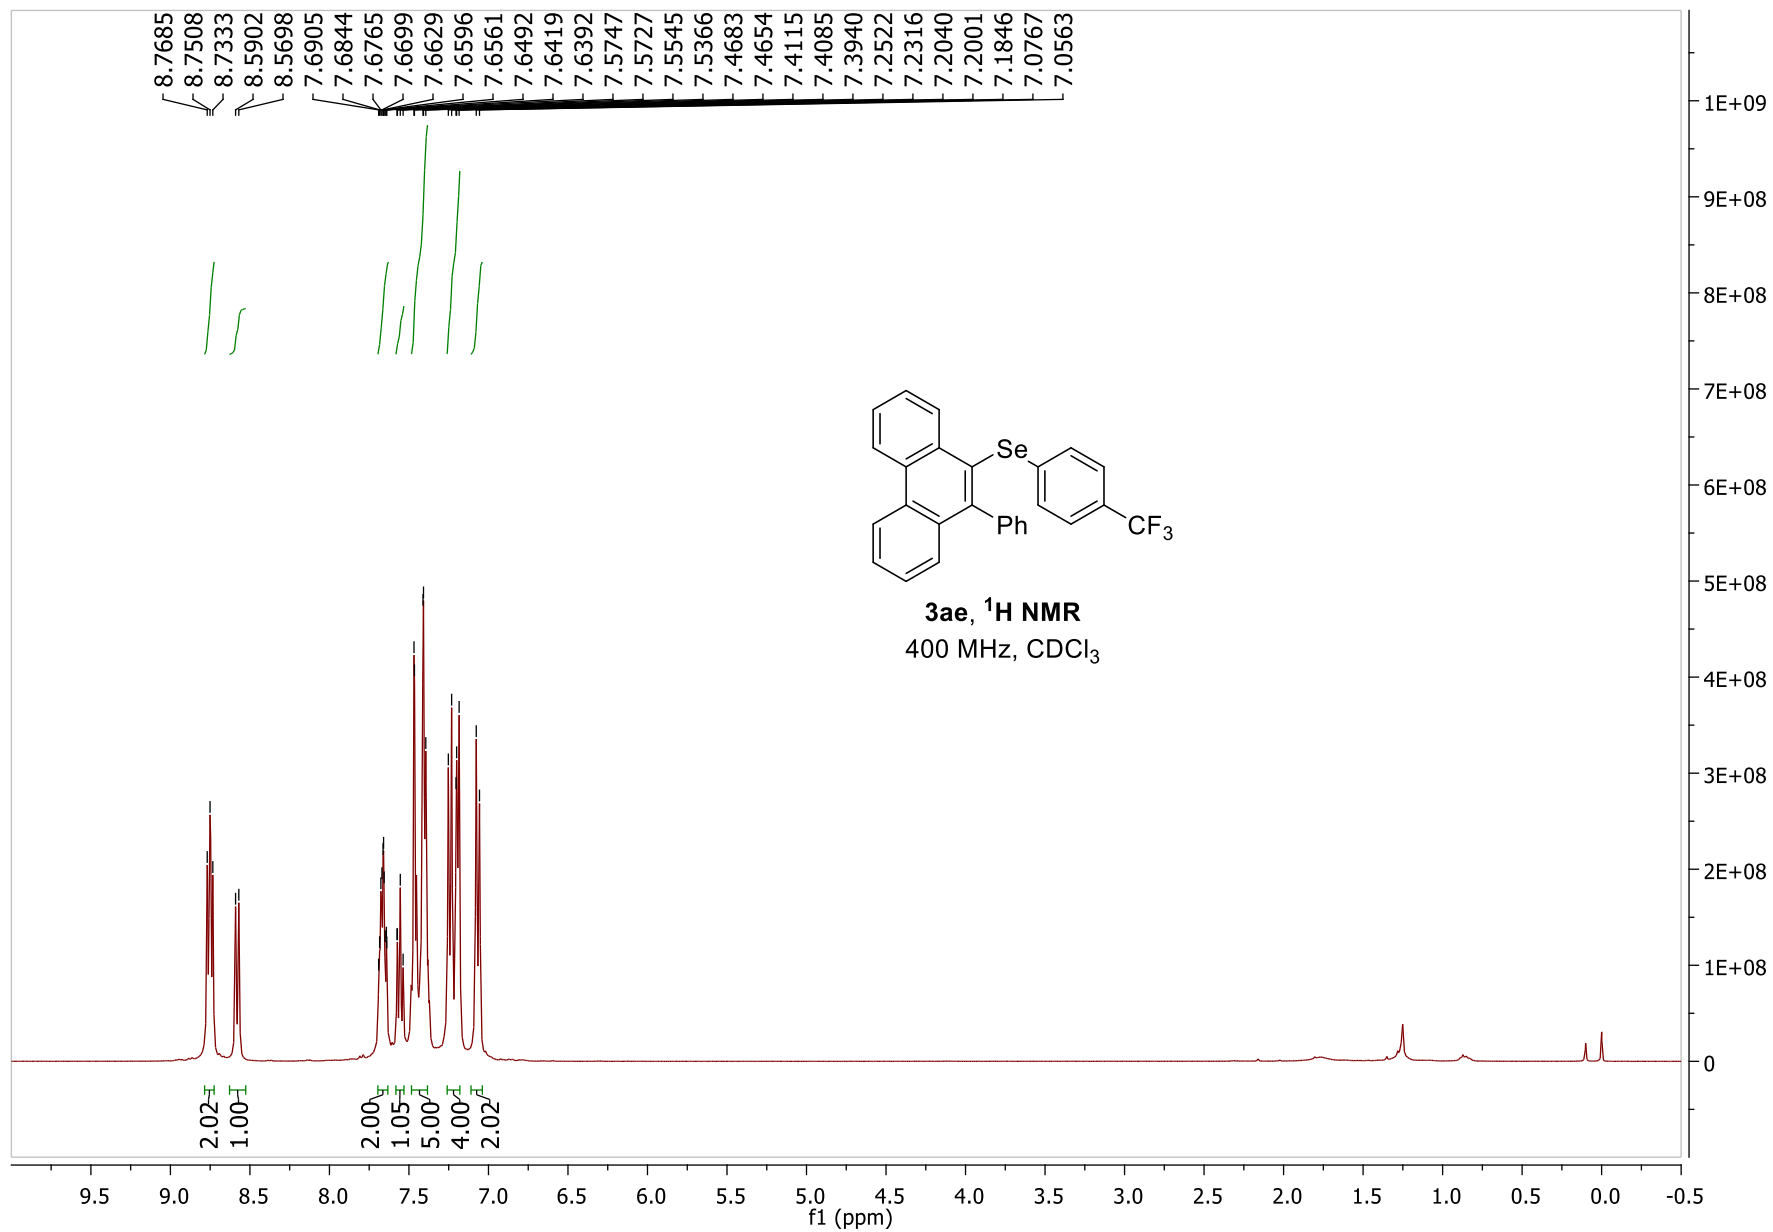

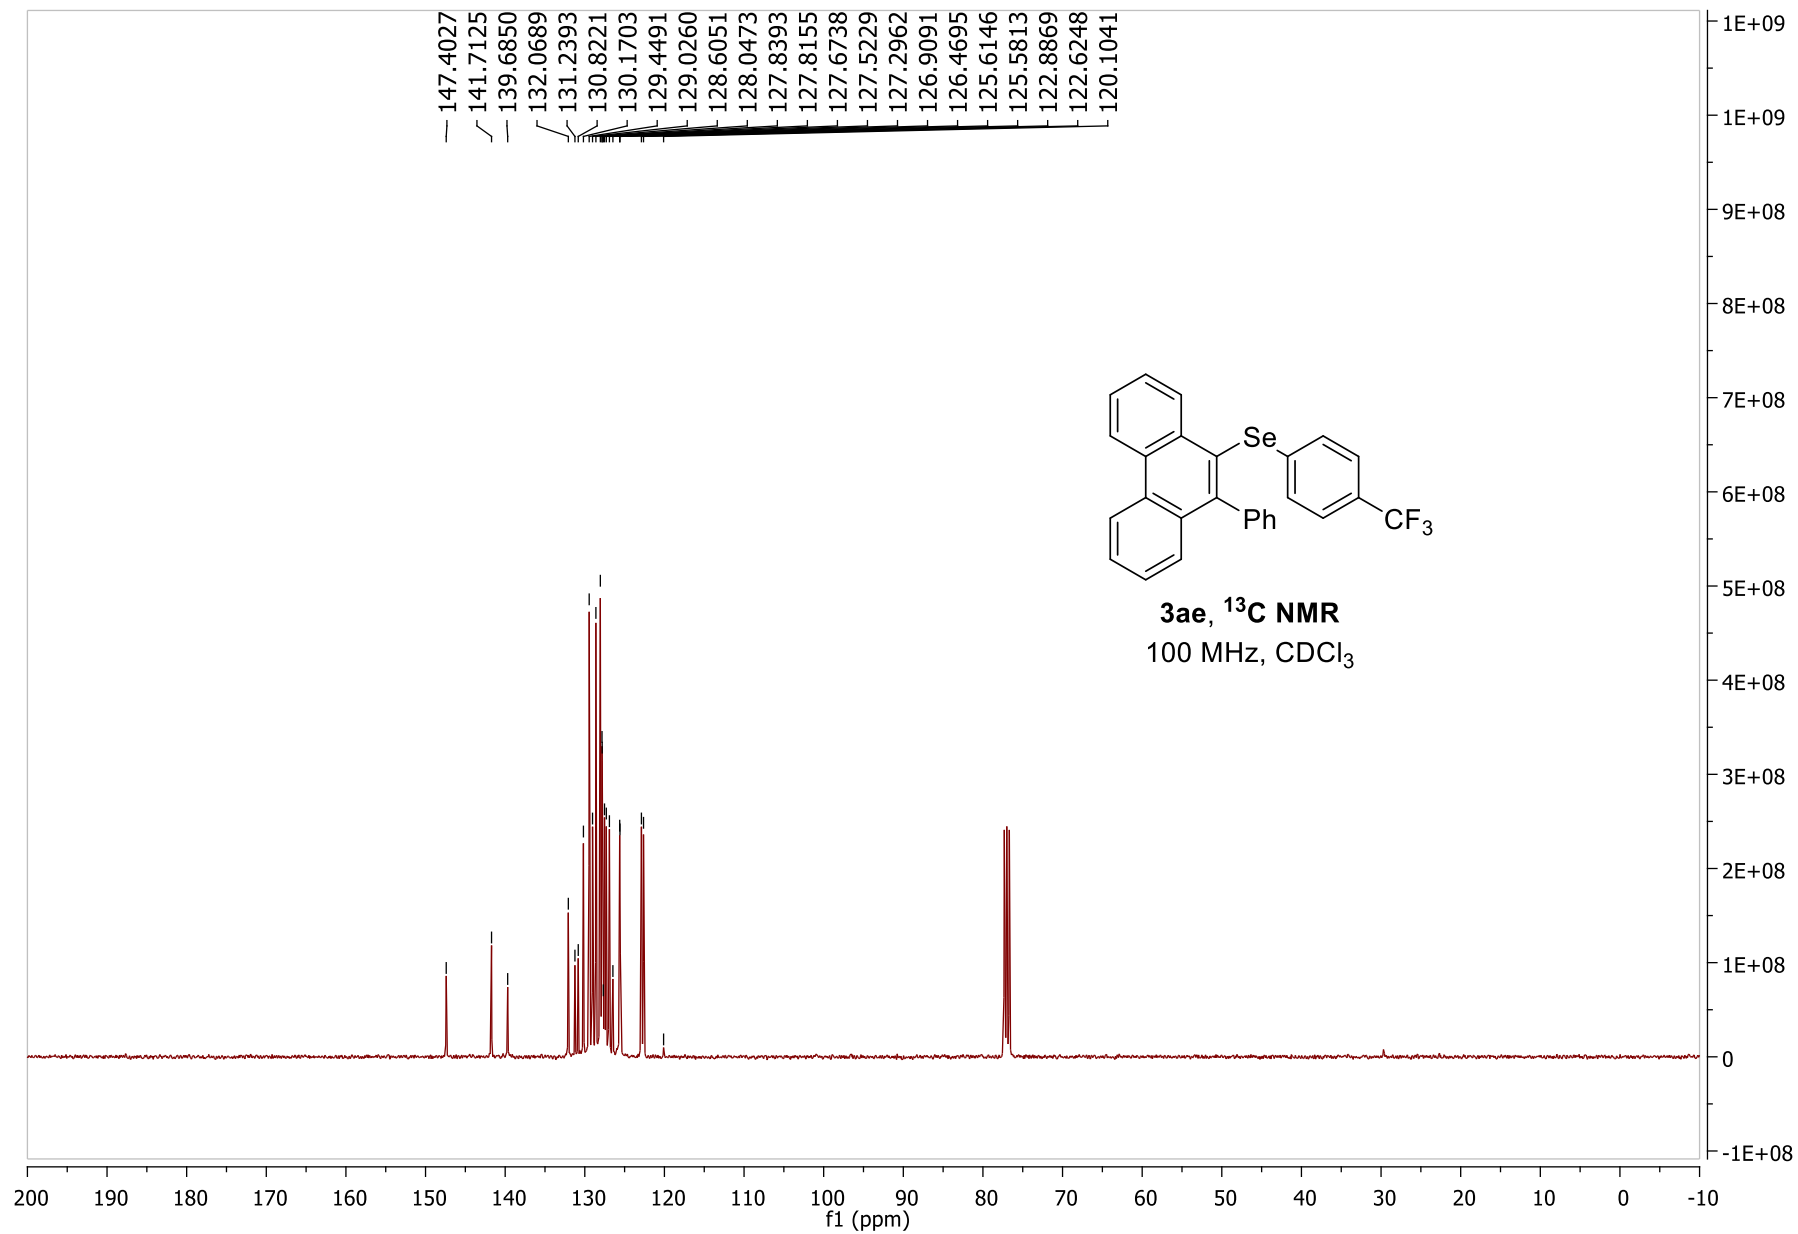

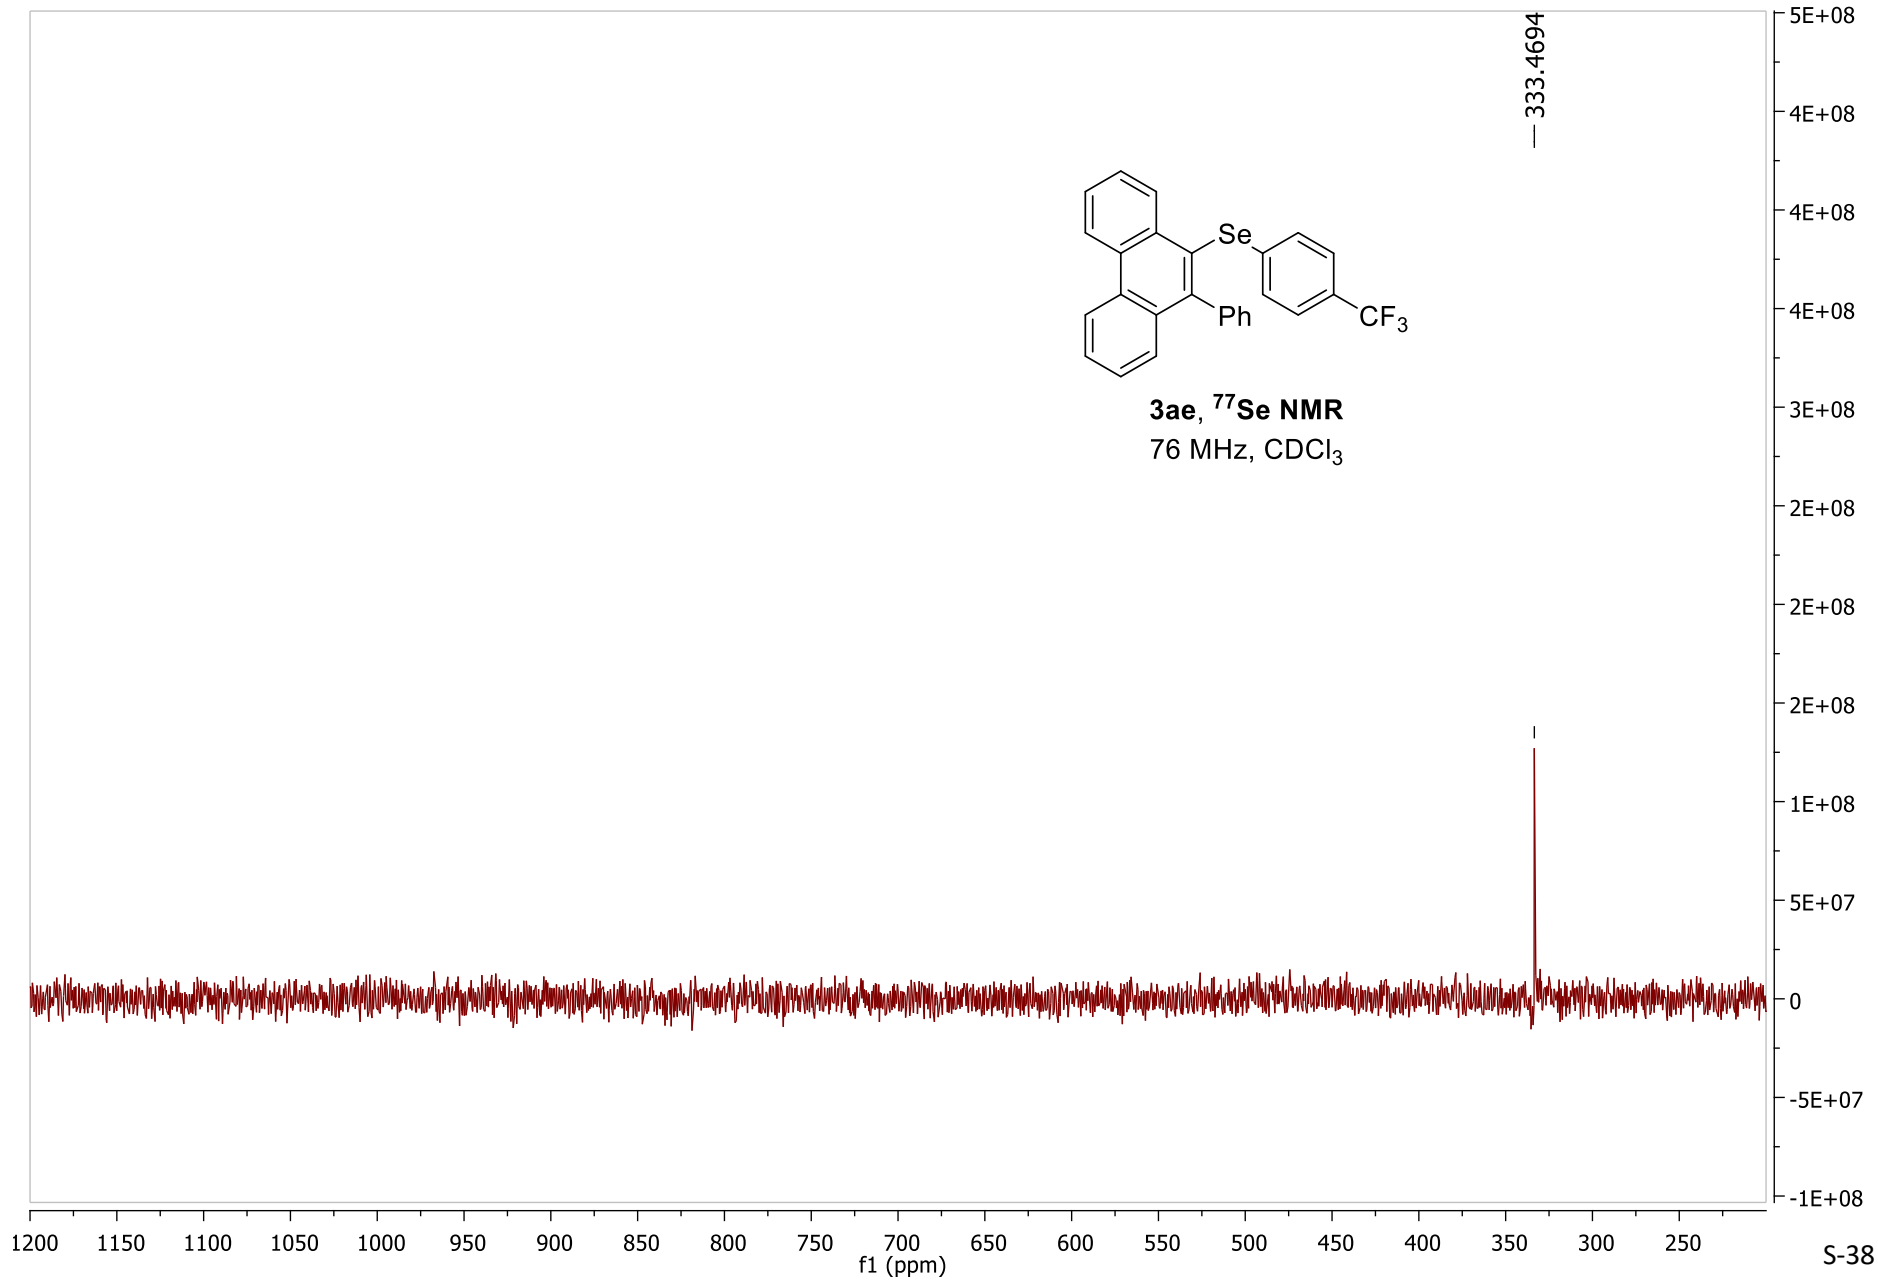

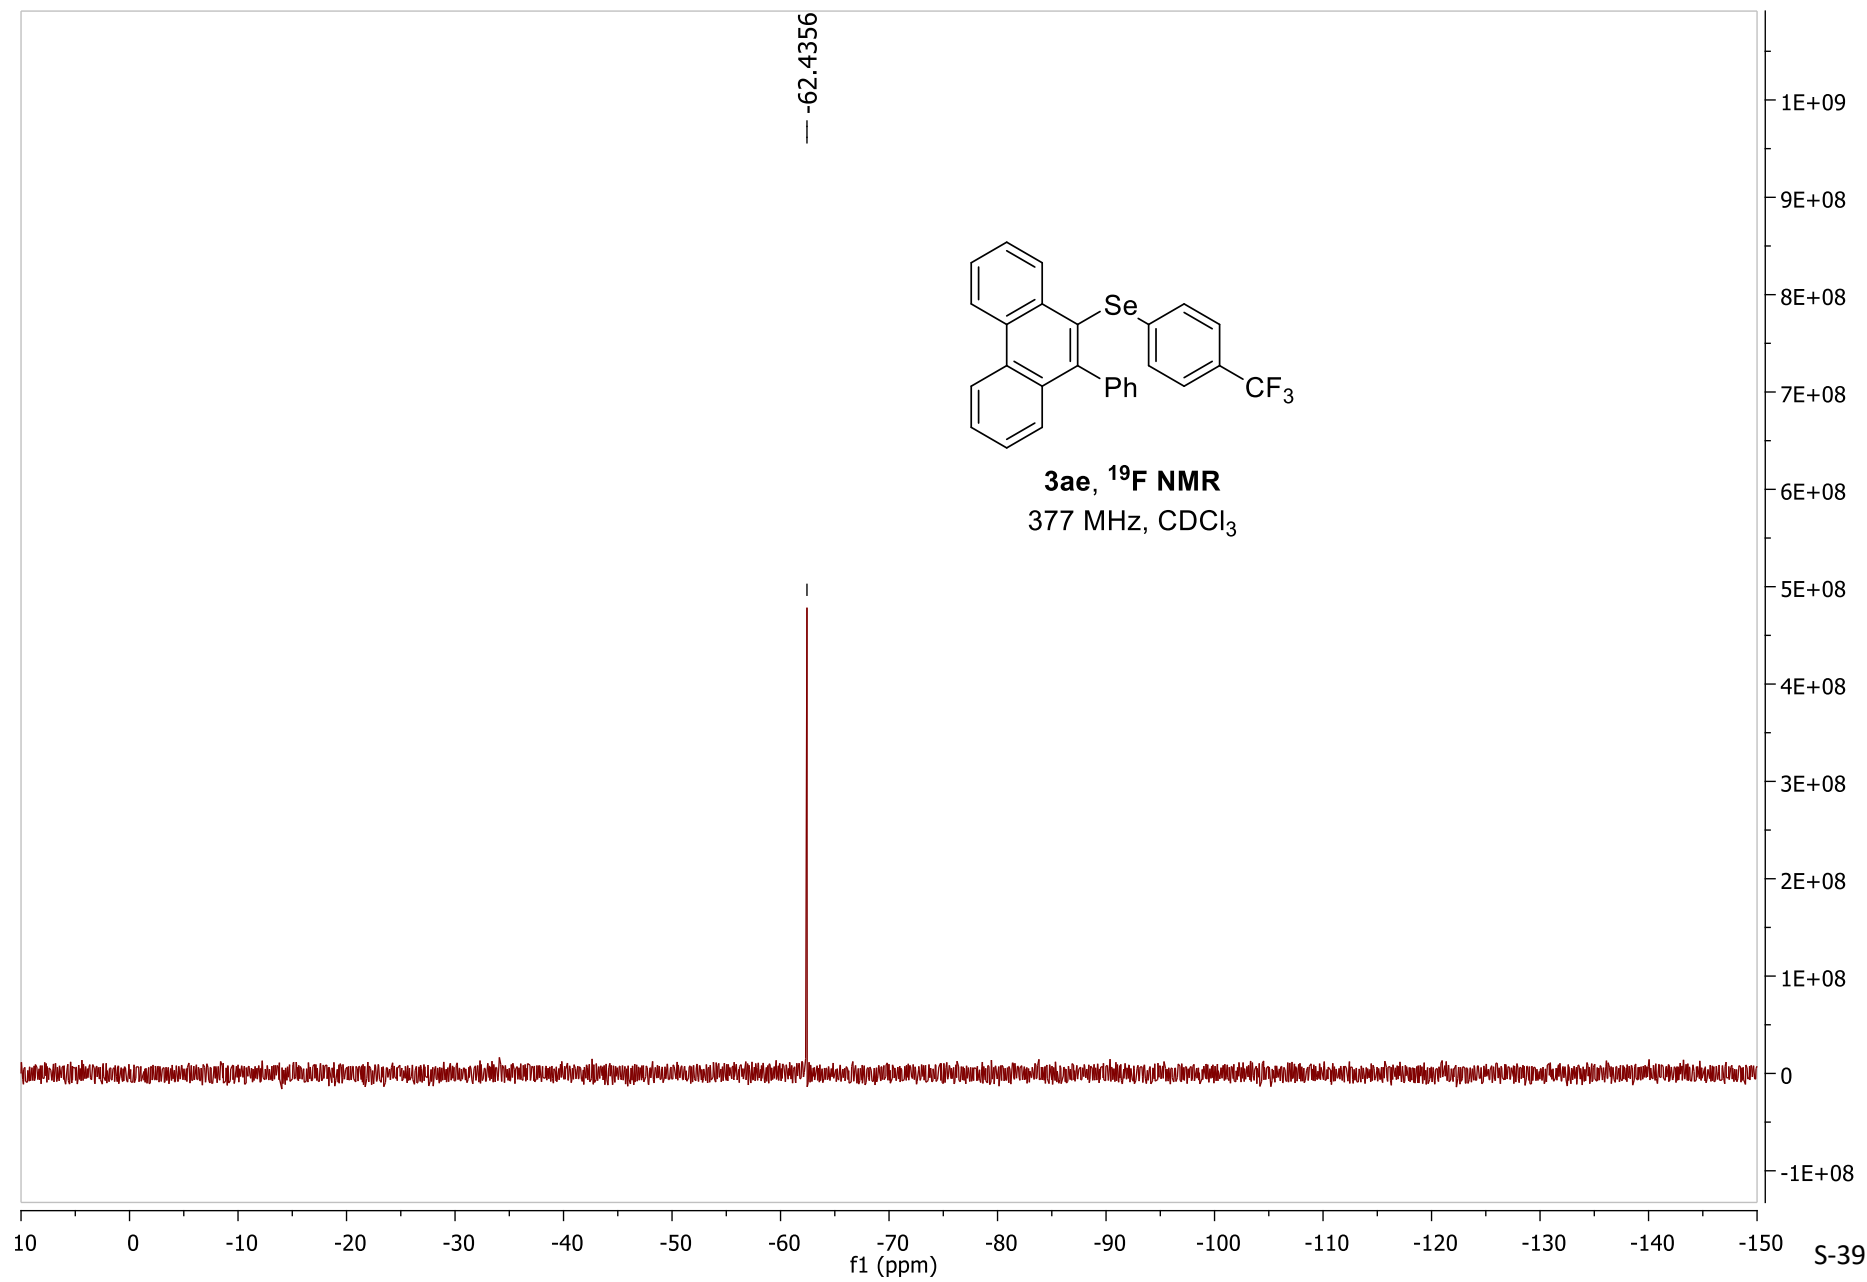

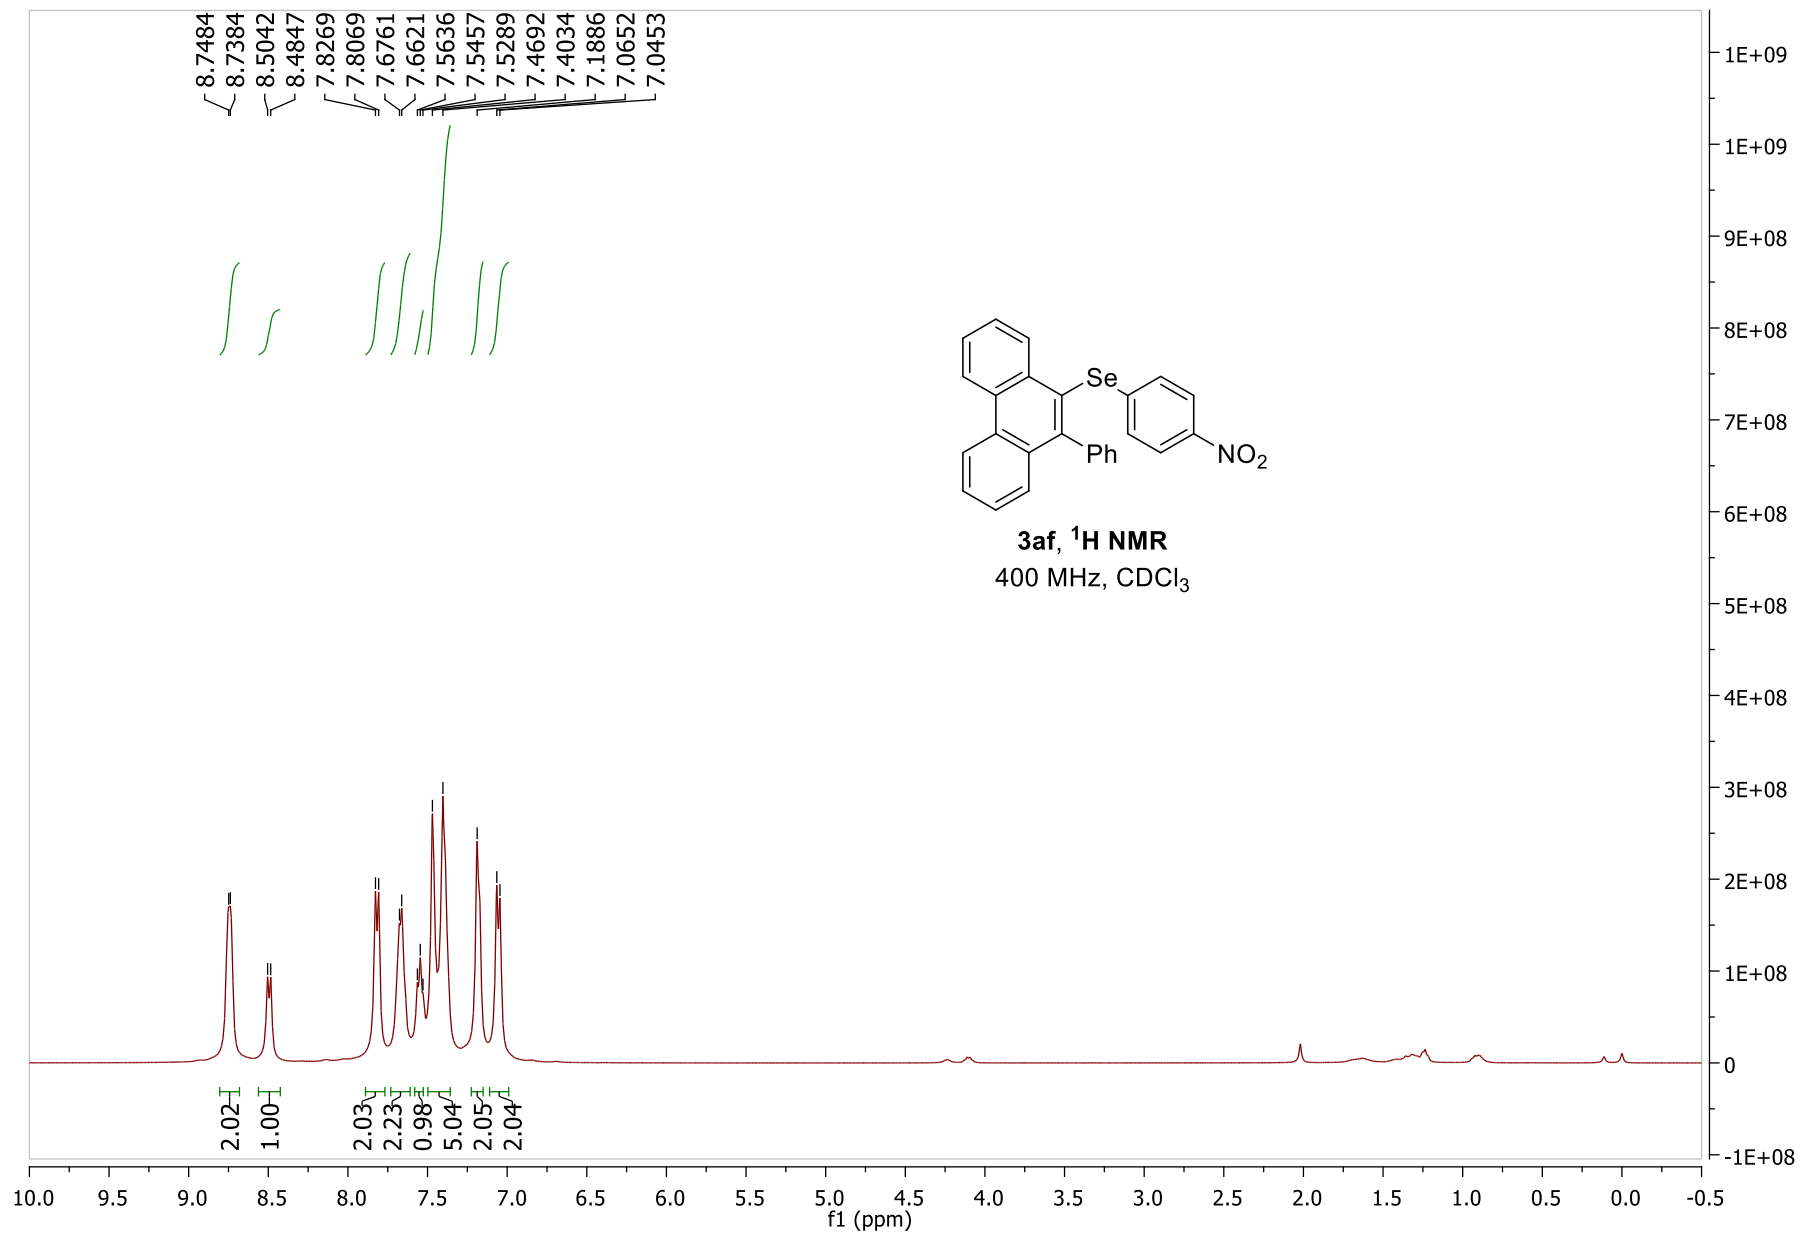

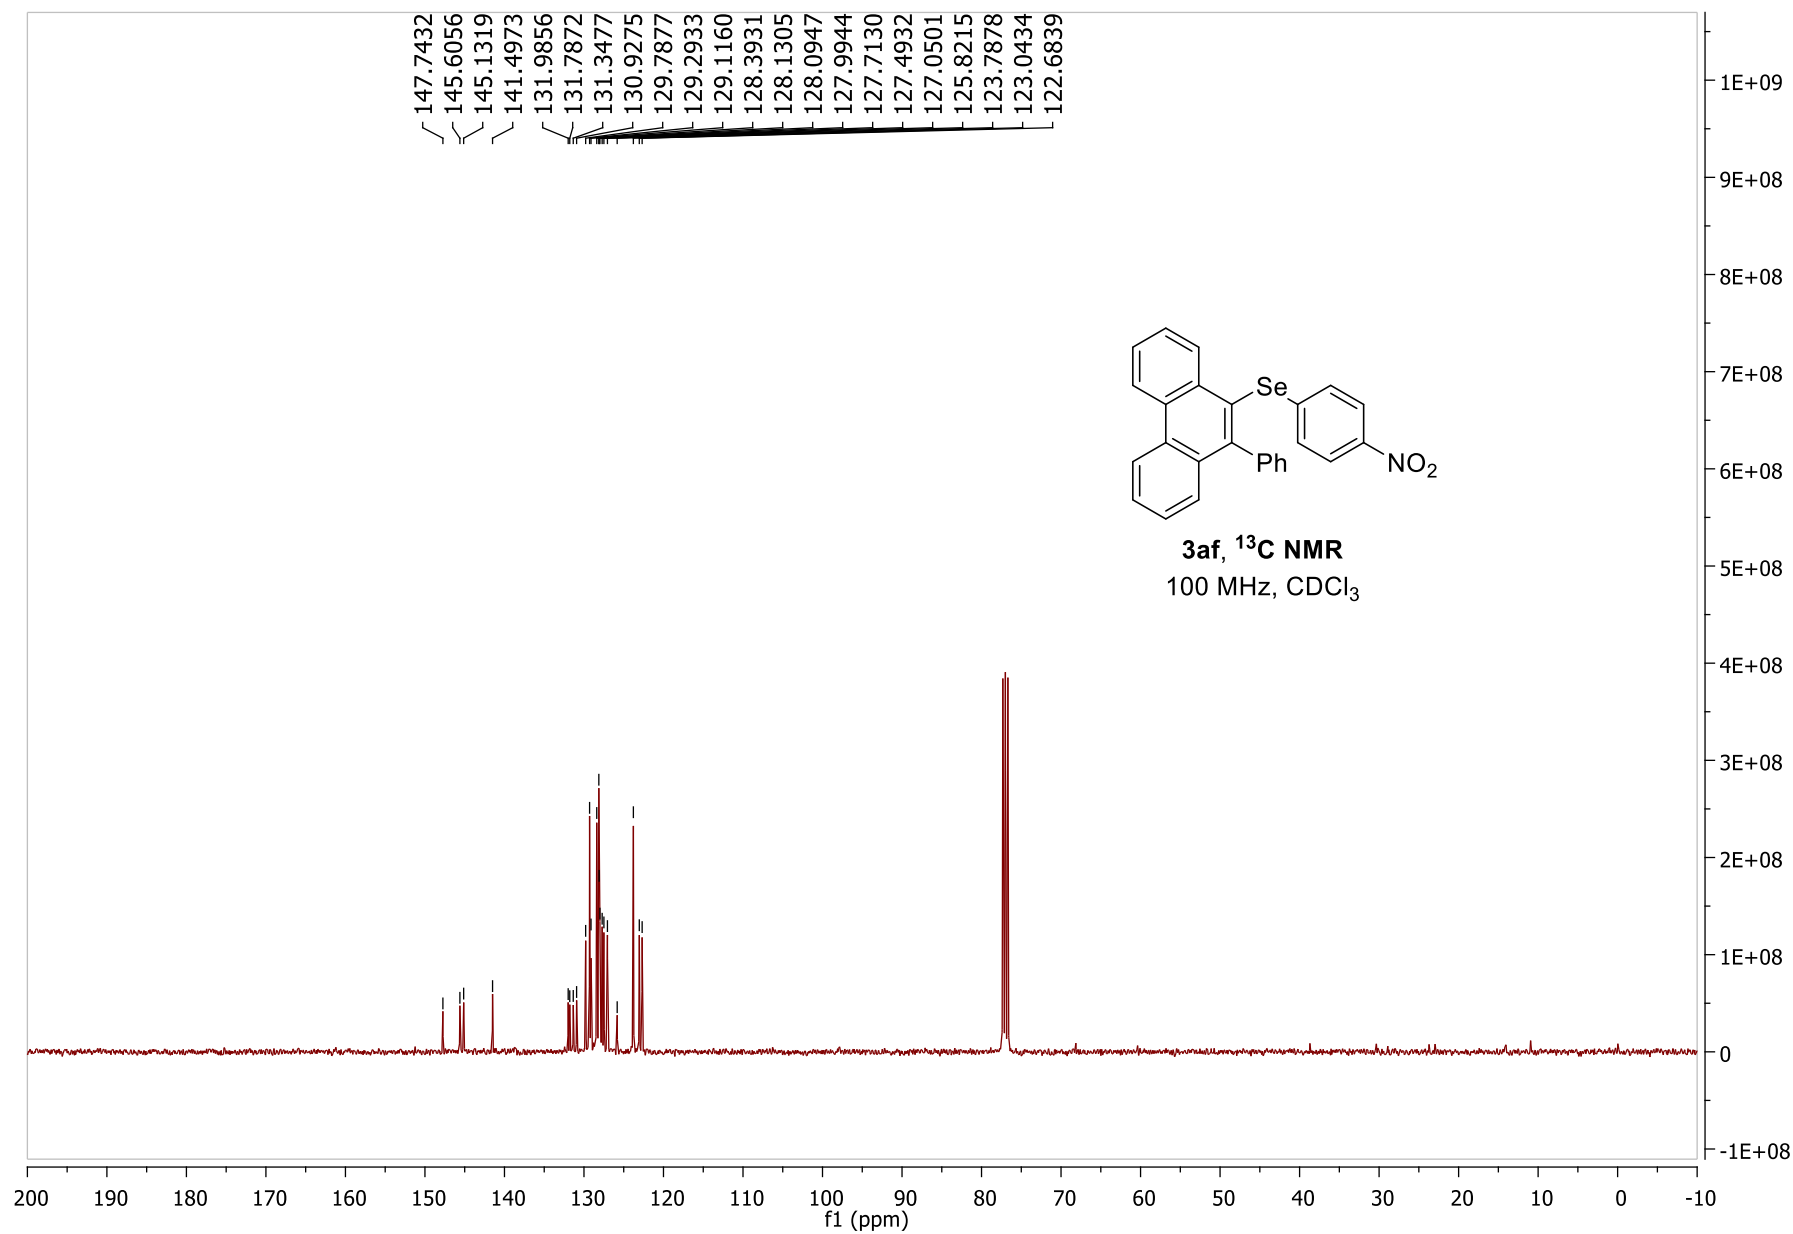

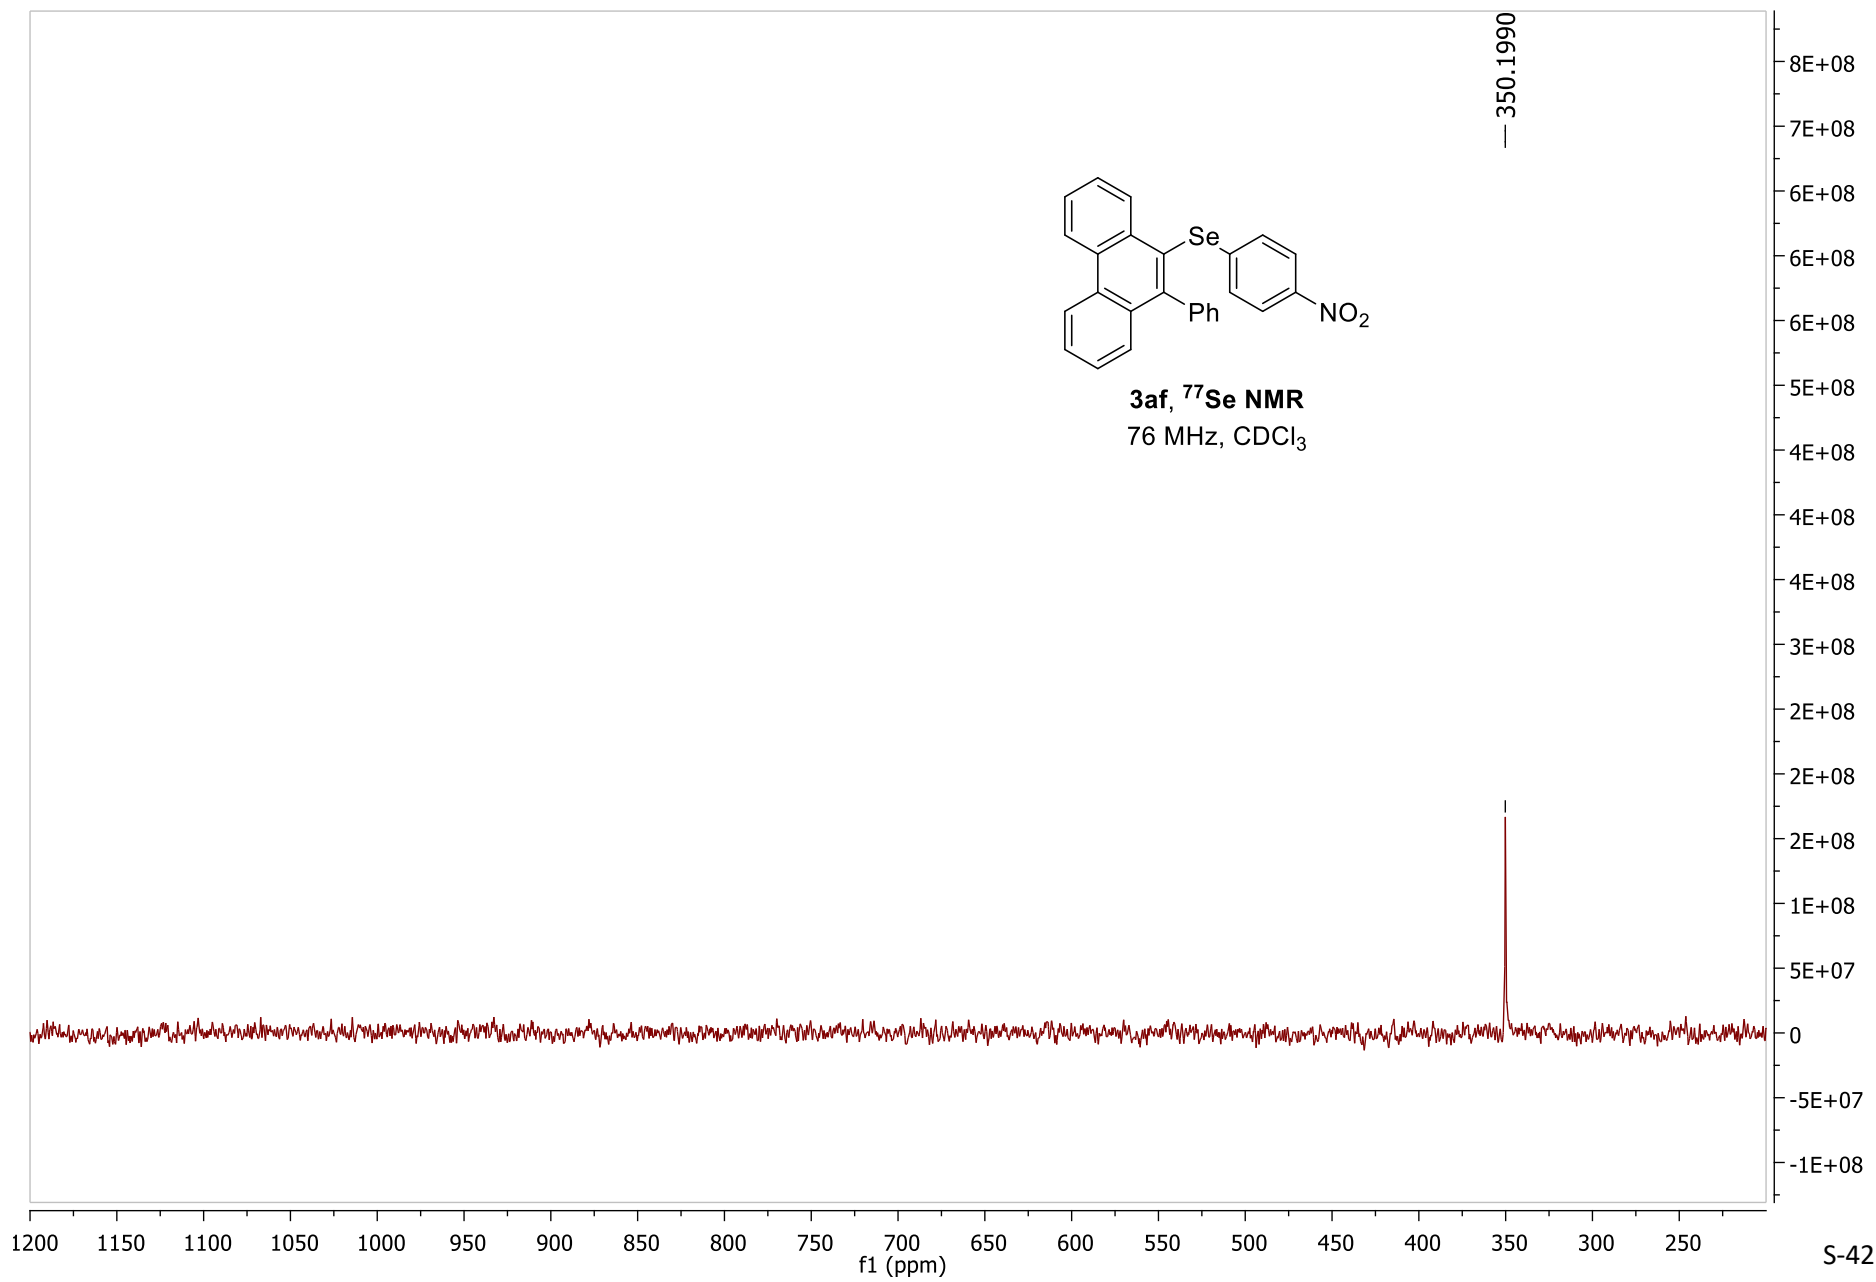

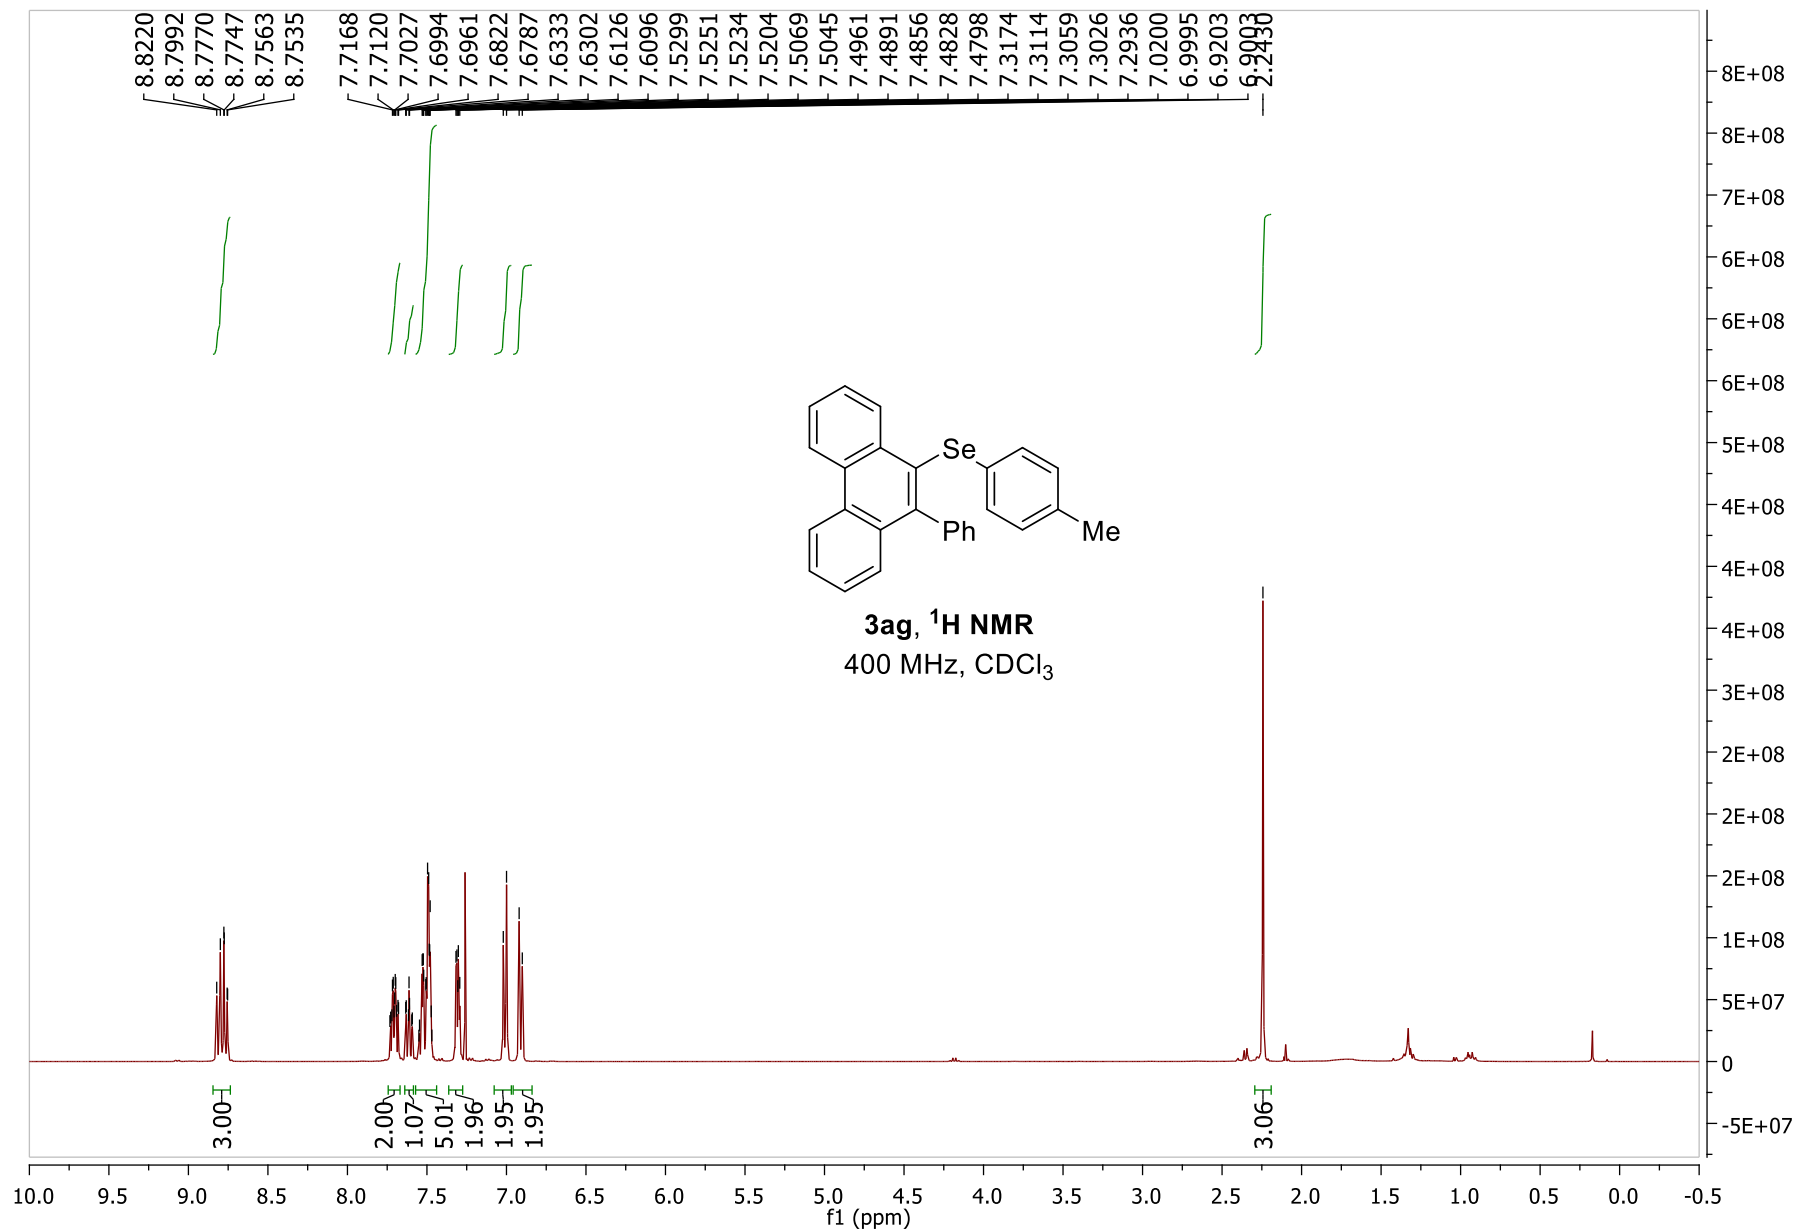

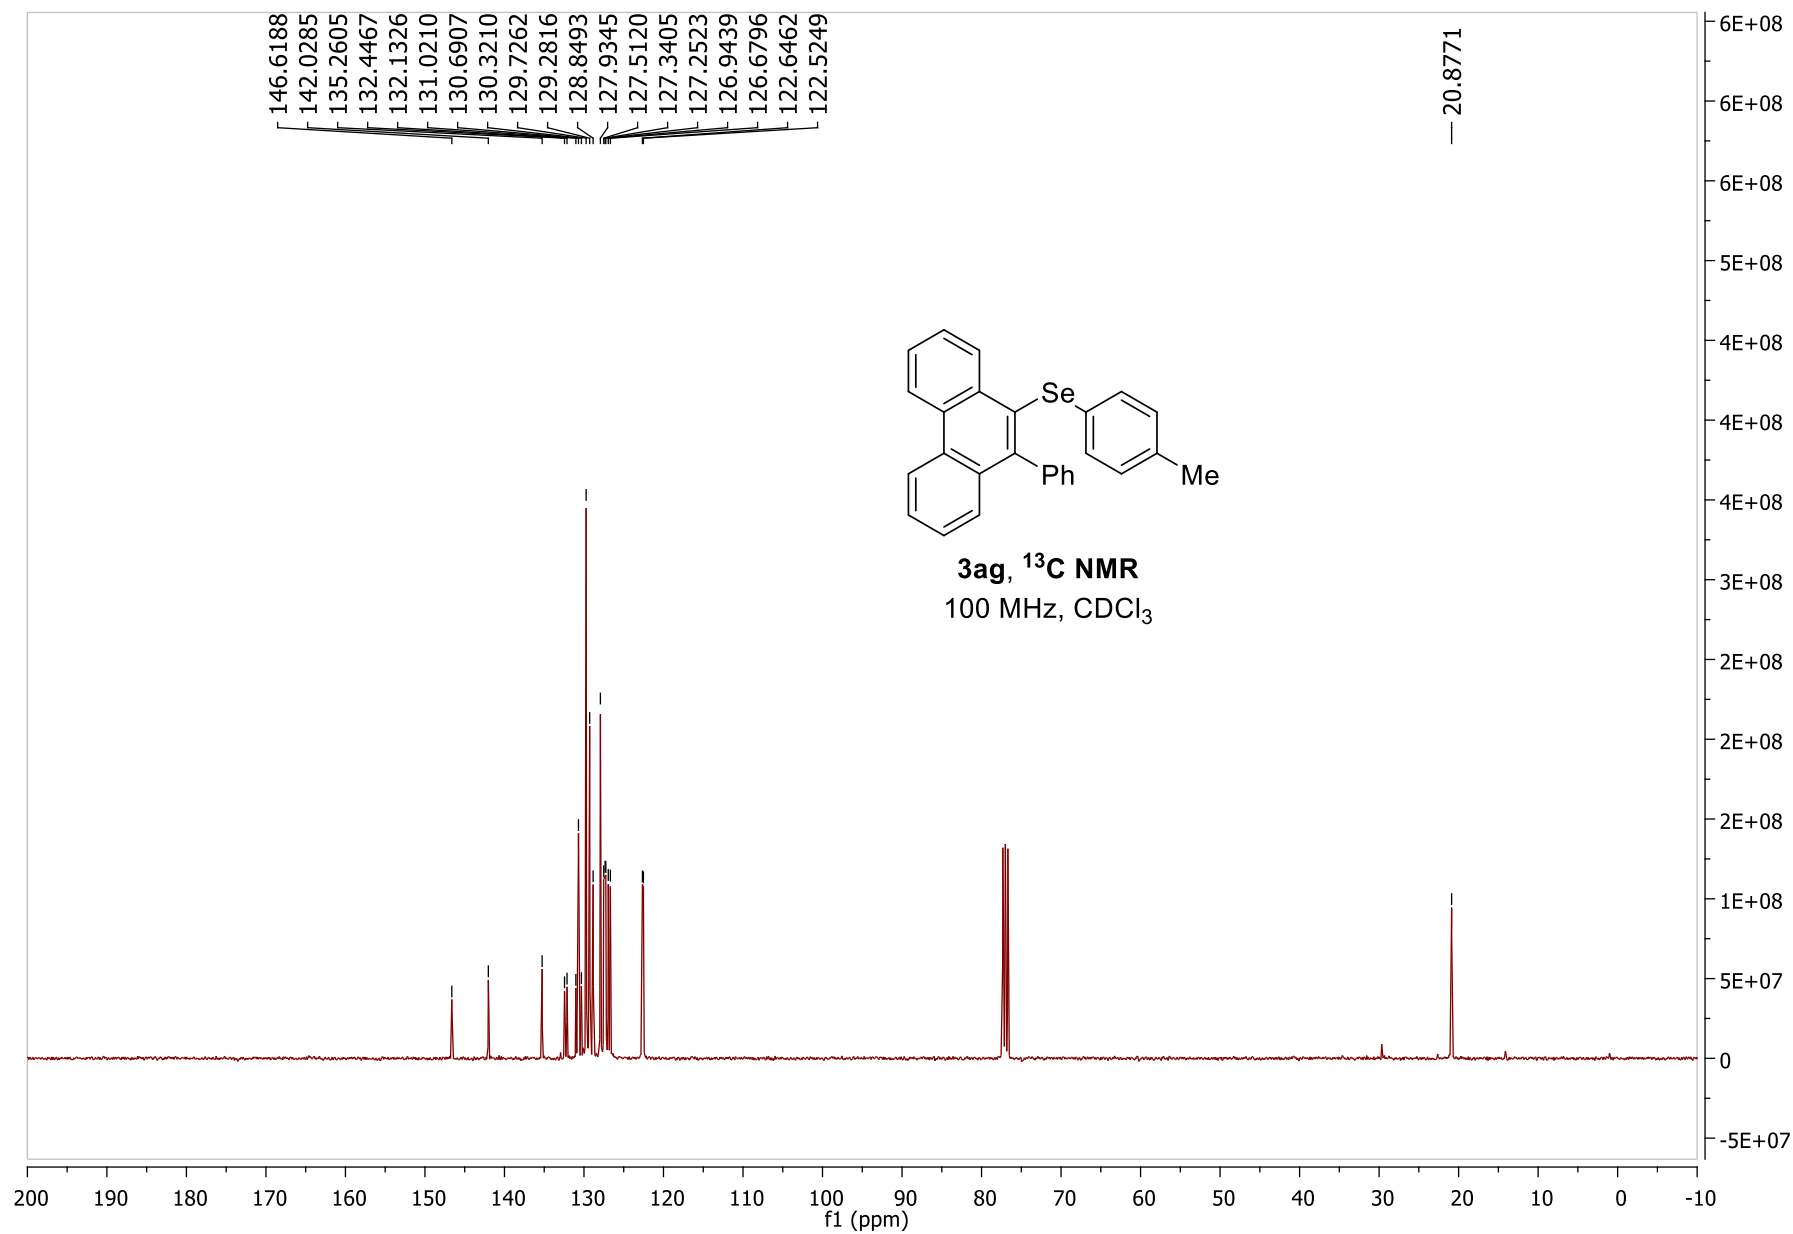

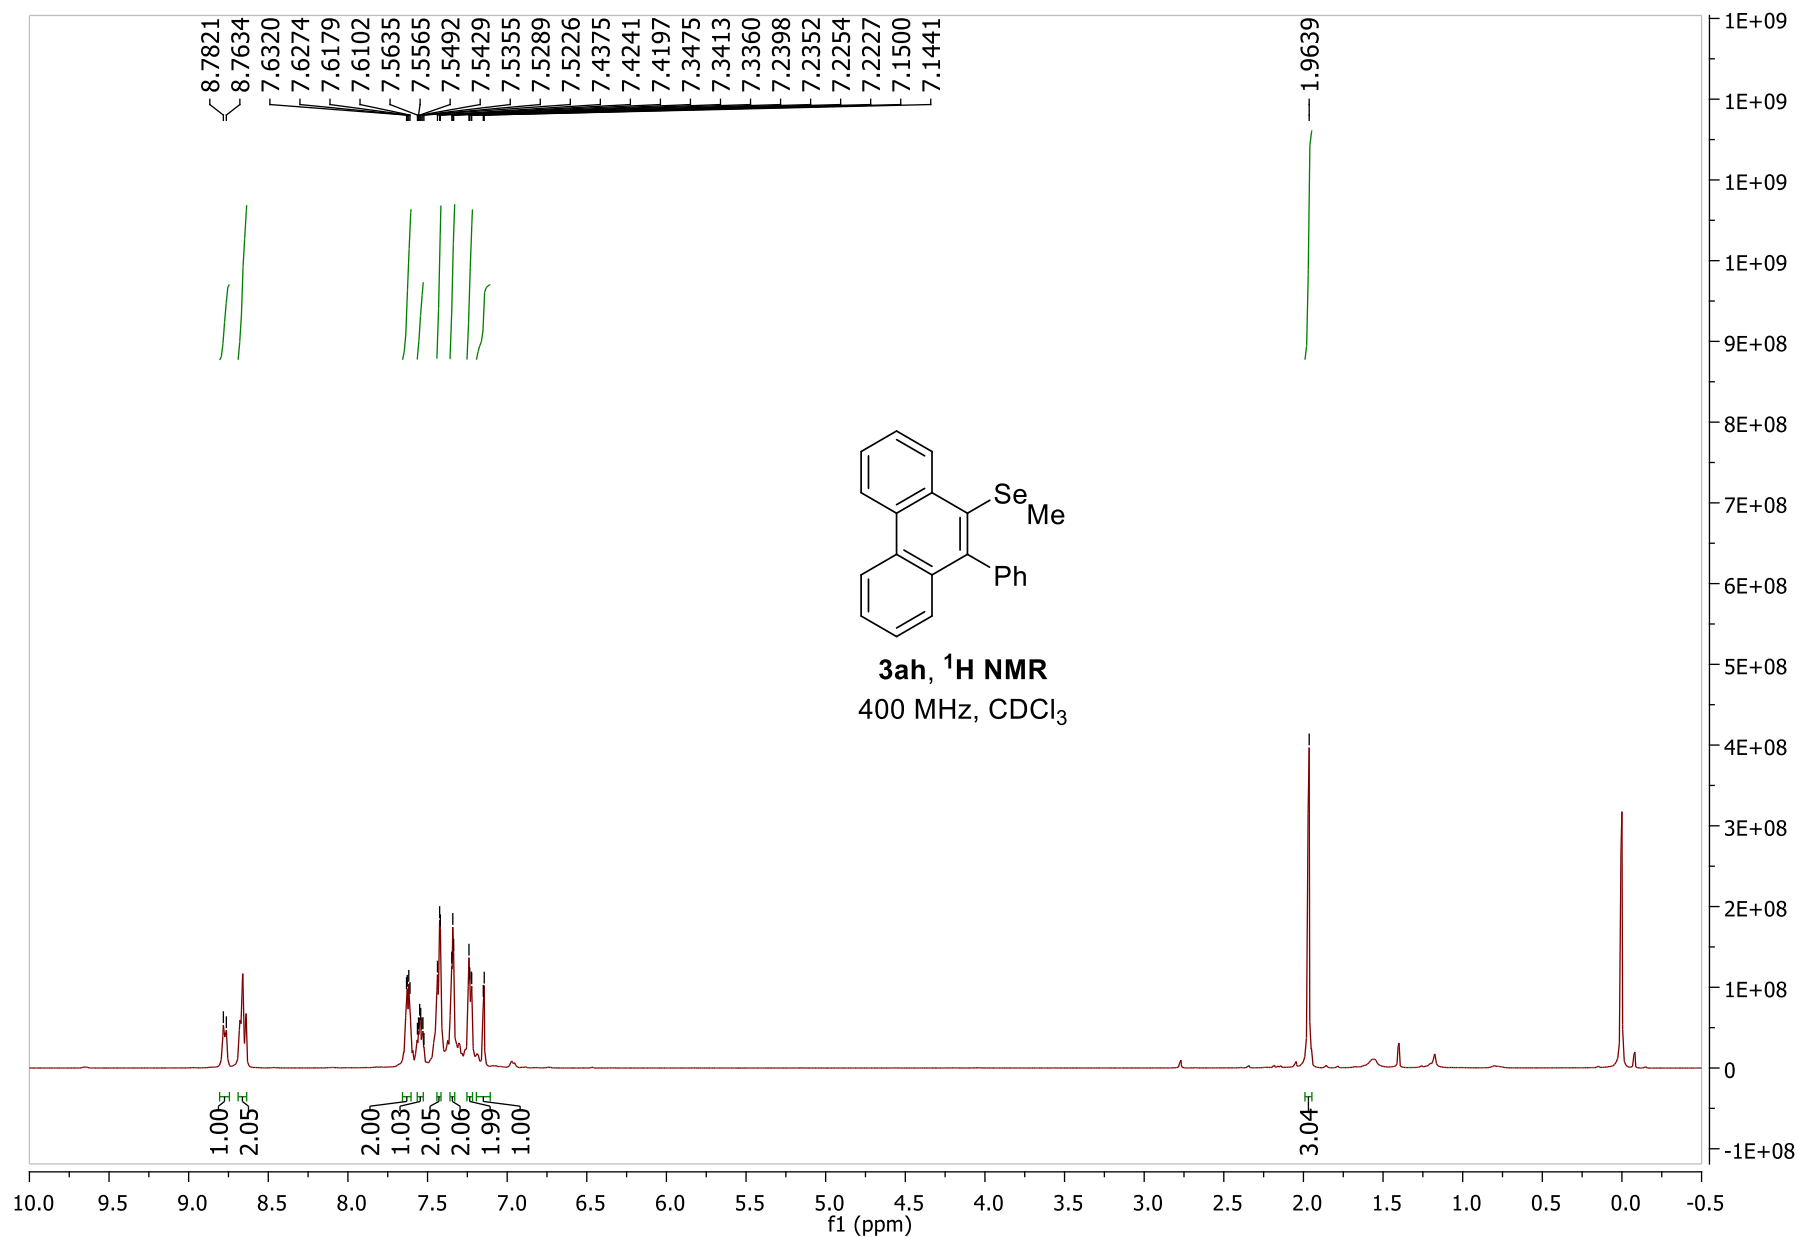

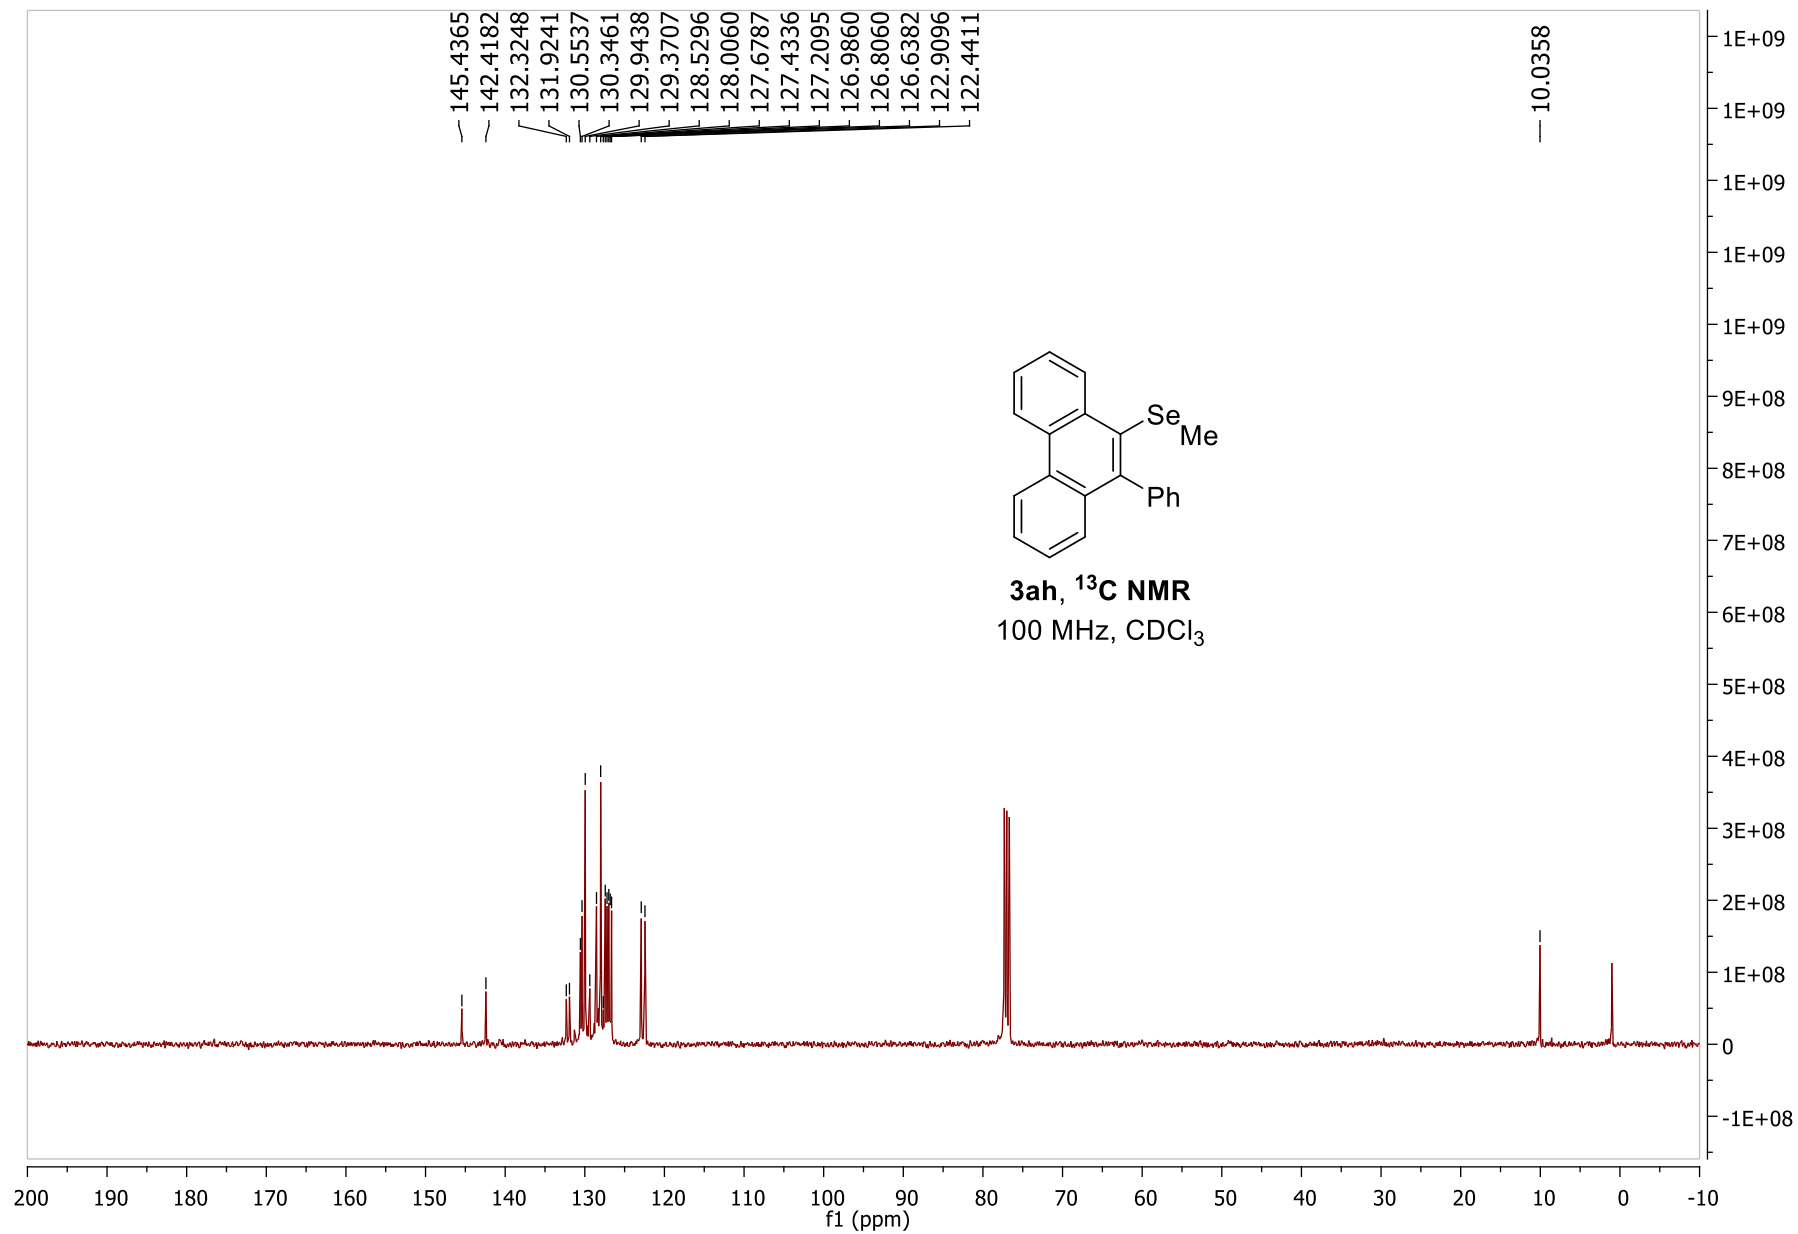

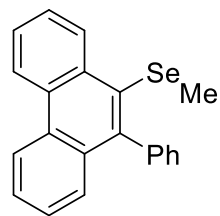

**3ah,  $^{77}\text{Se}$  NMR**  
76 MHz,  $\text{CDCl}_3$

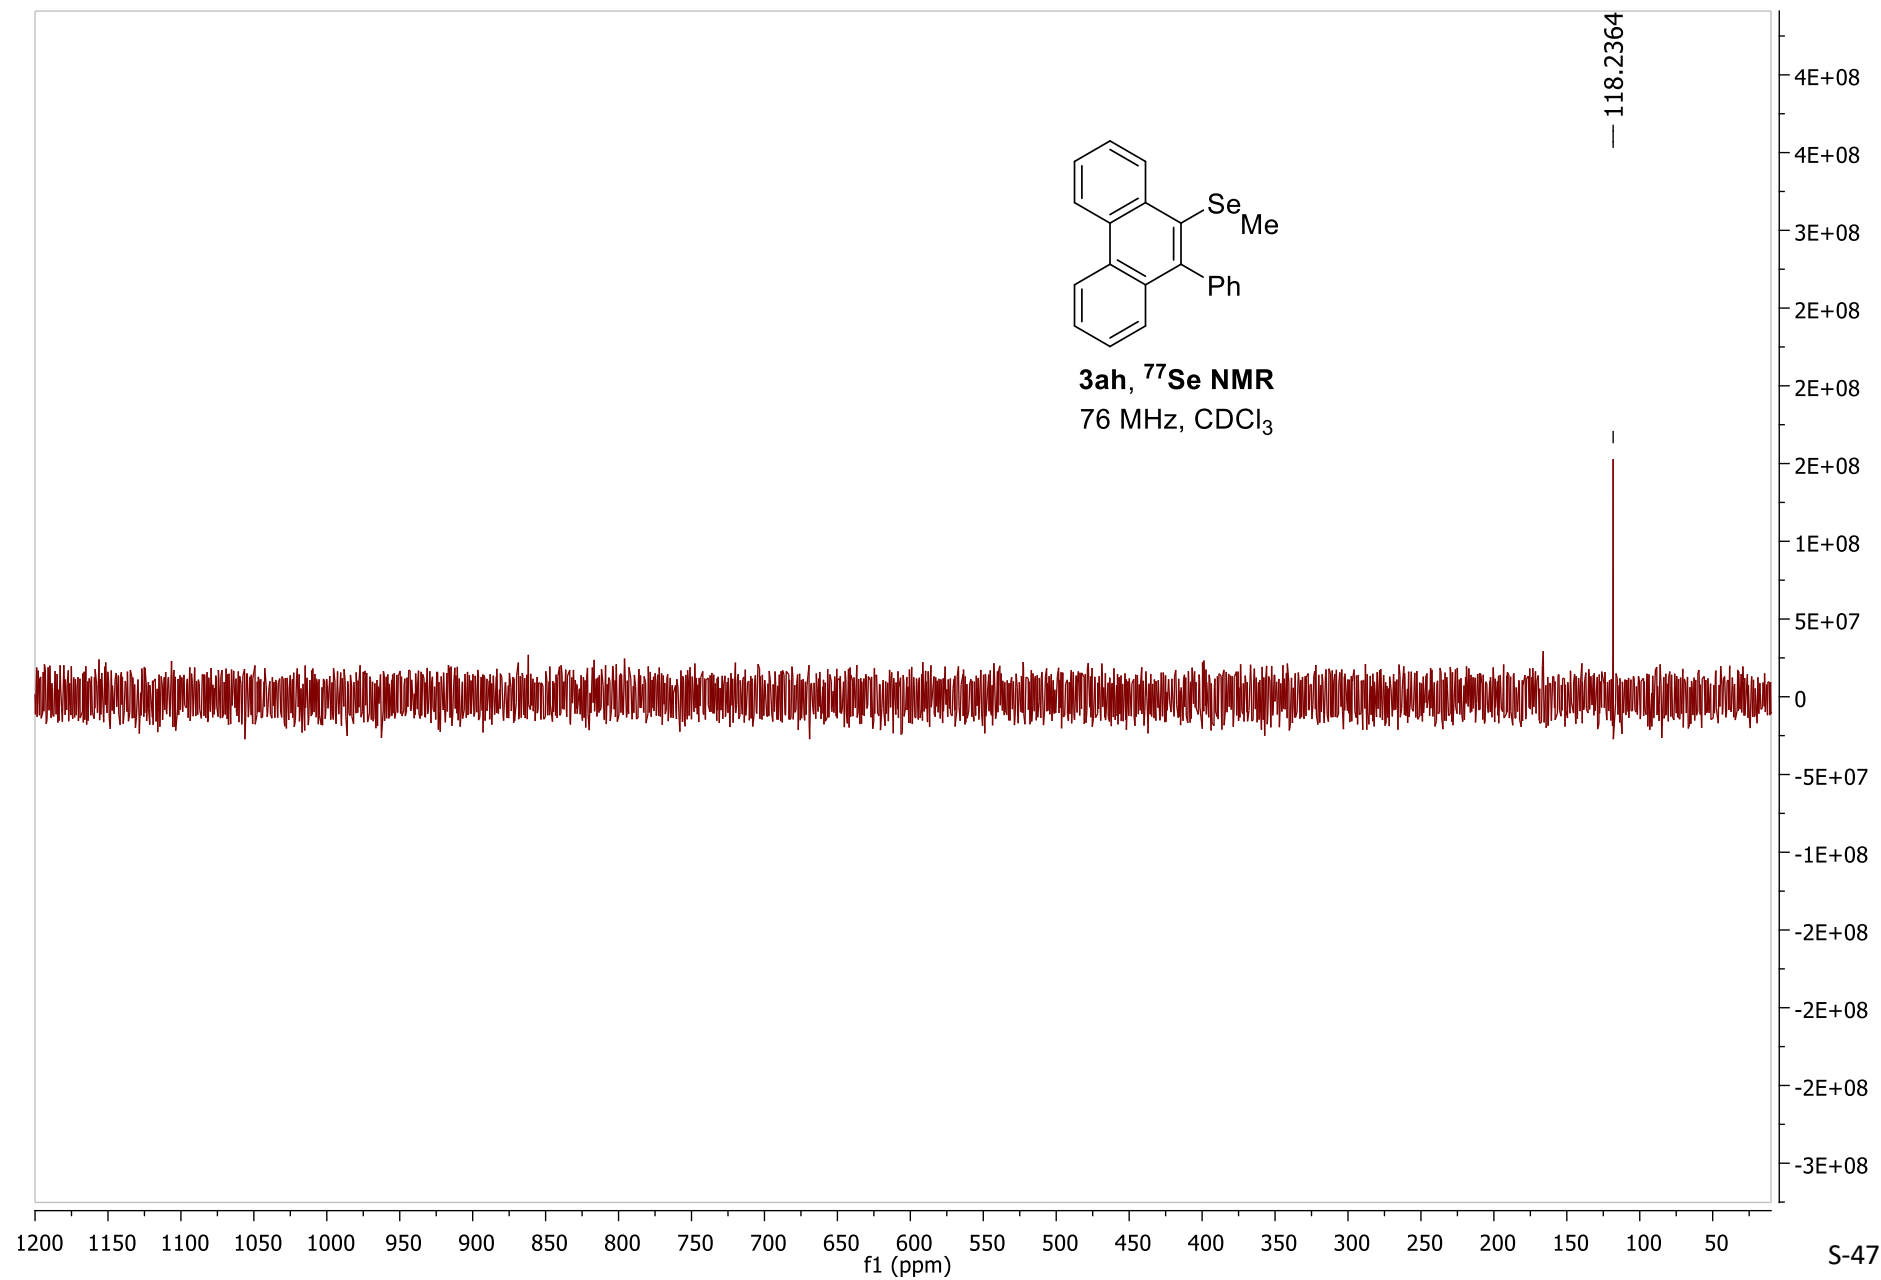

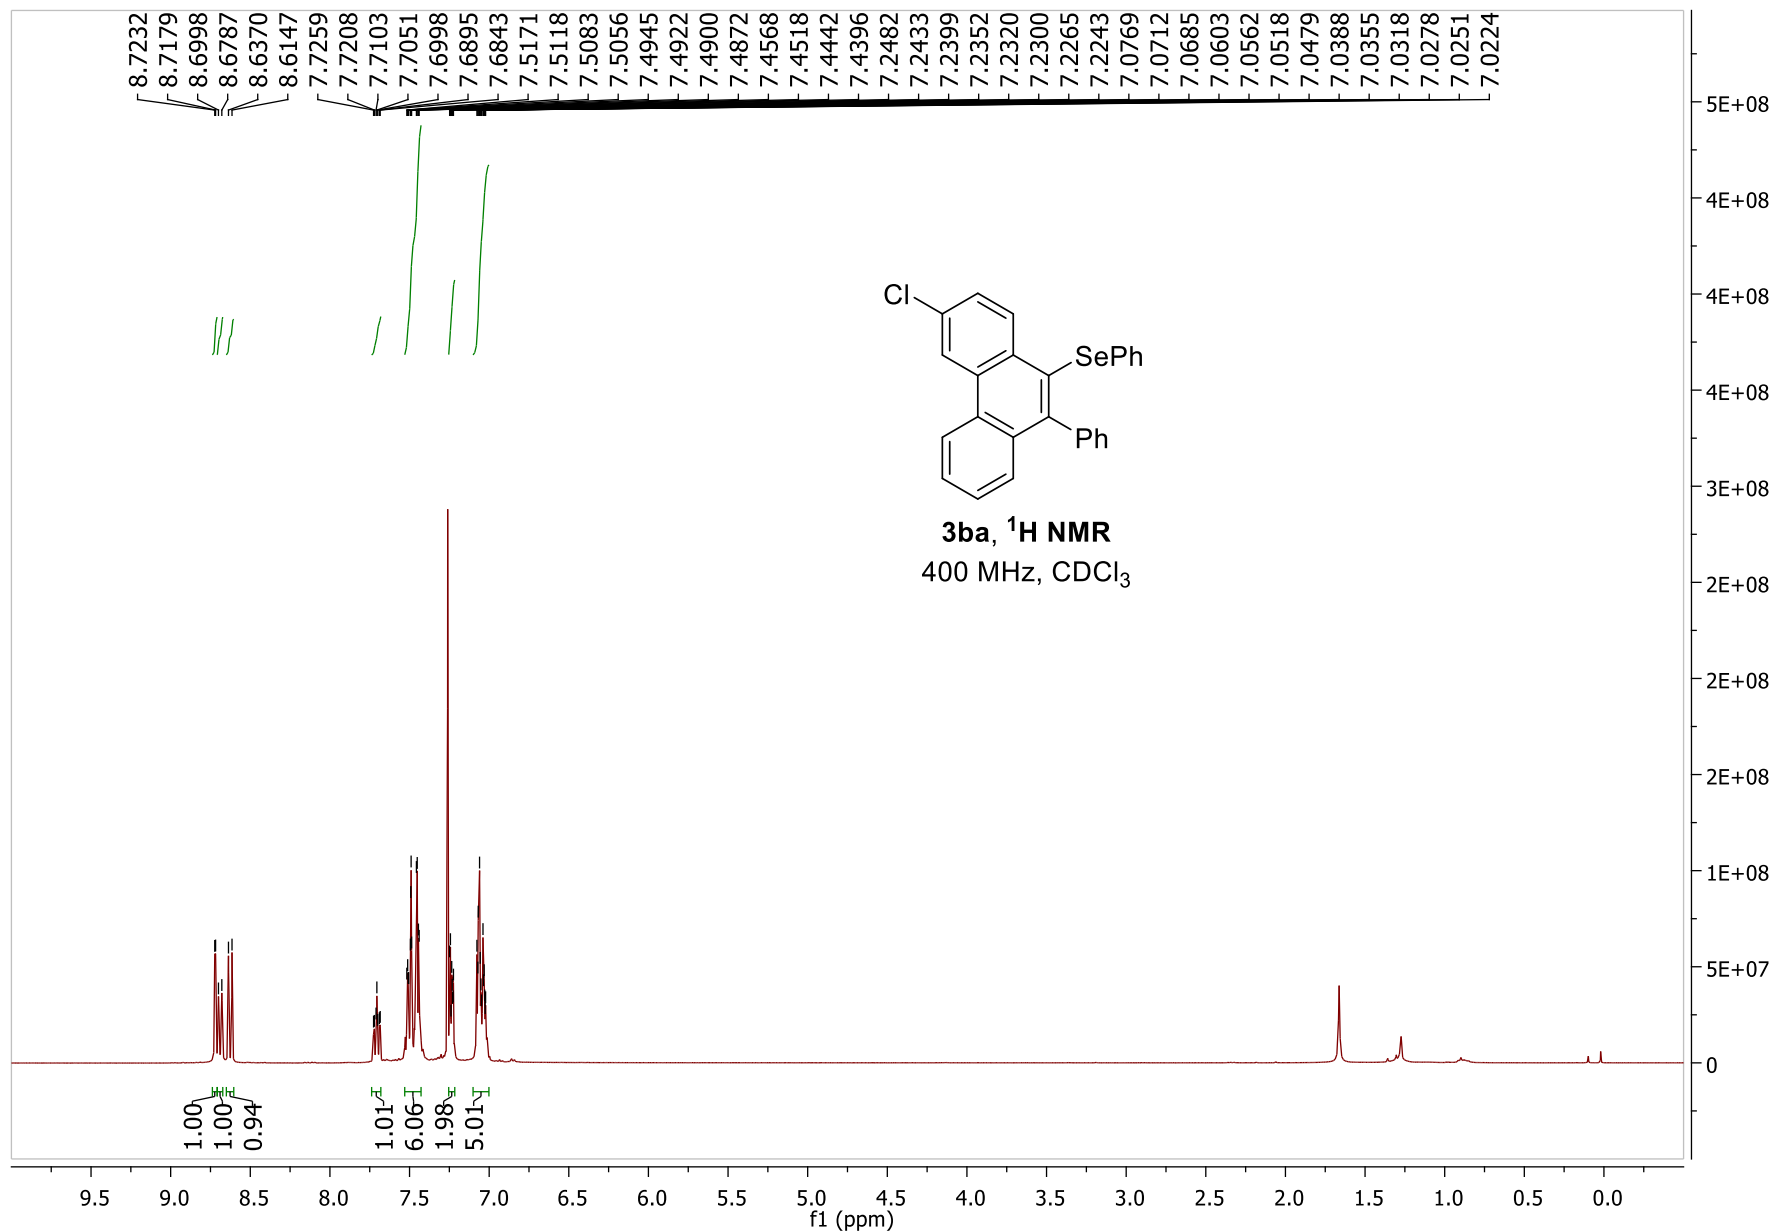

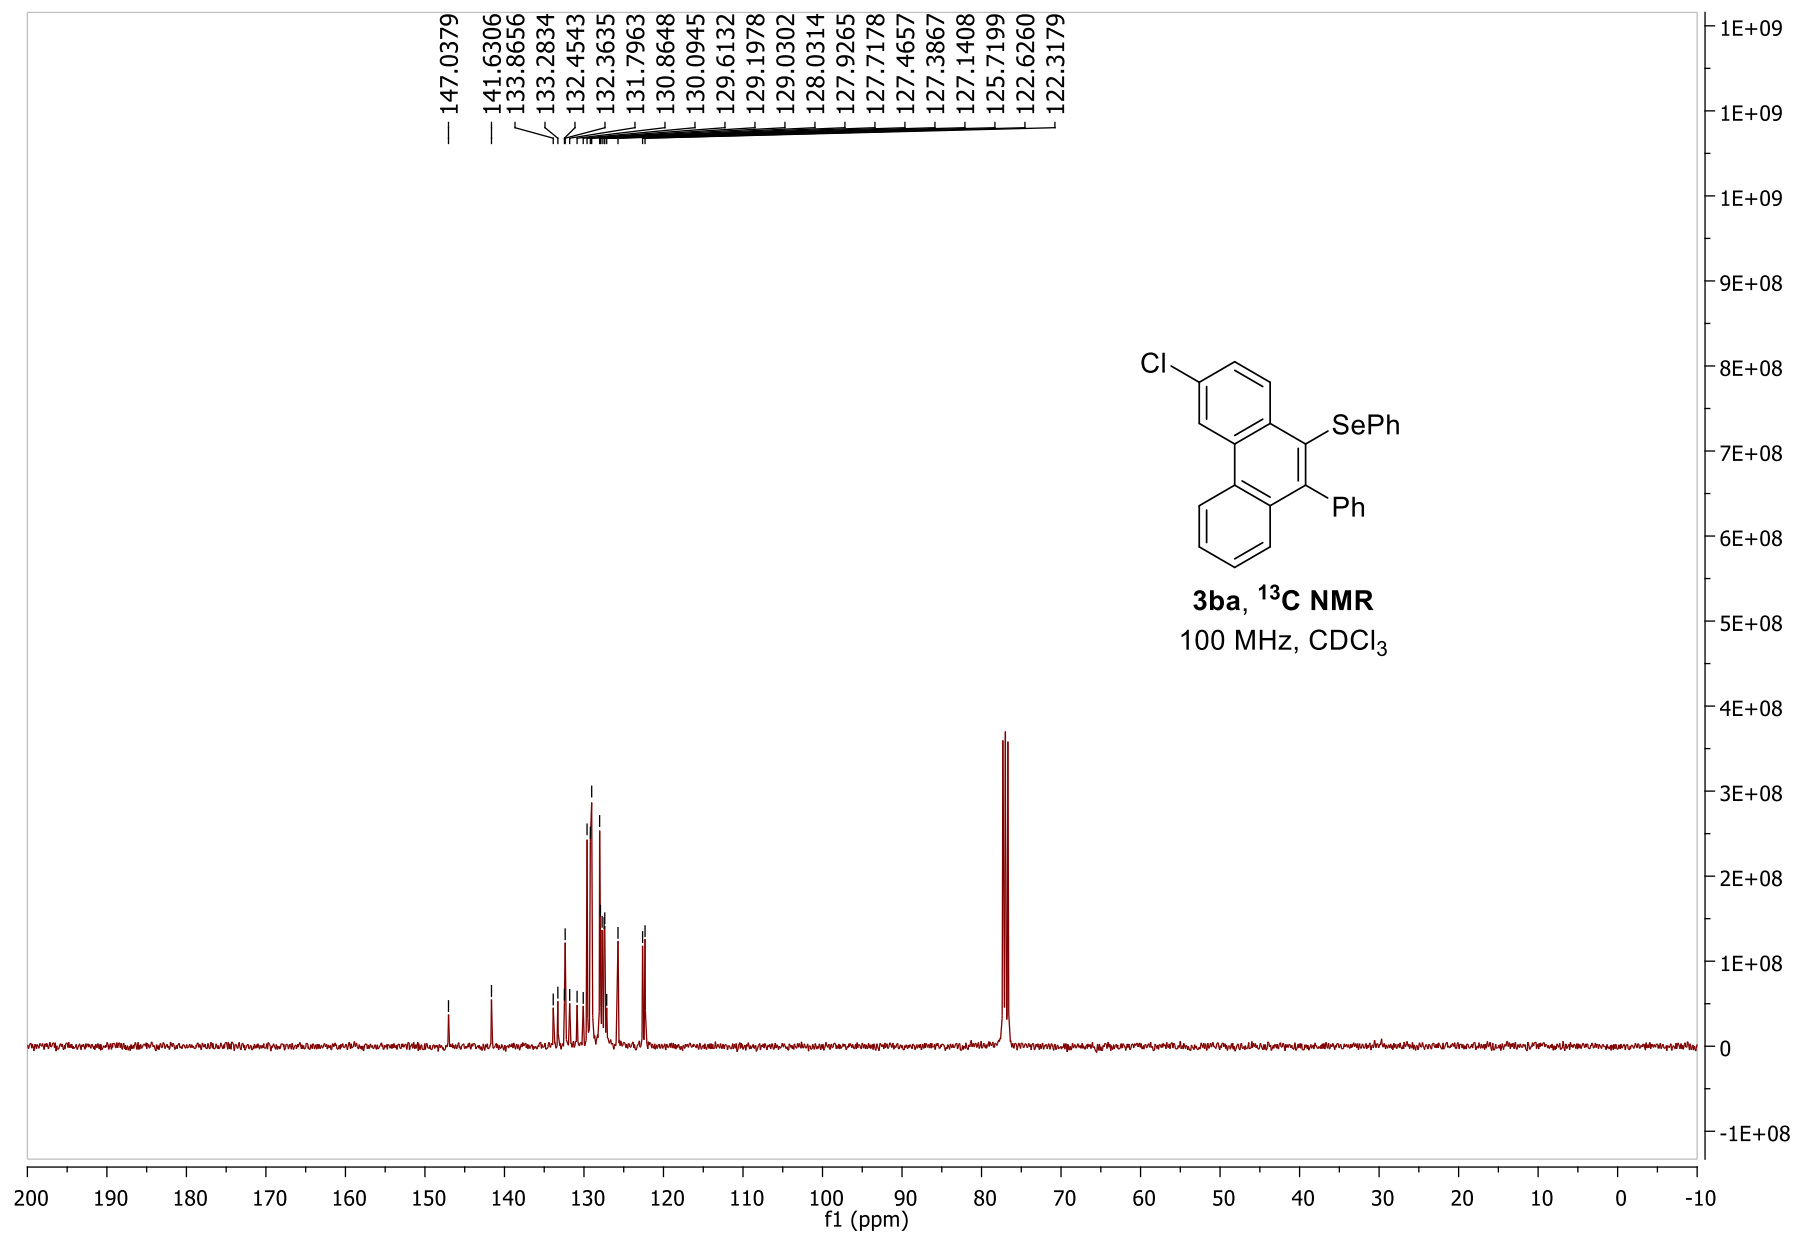

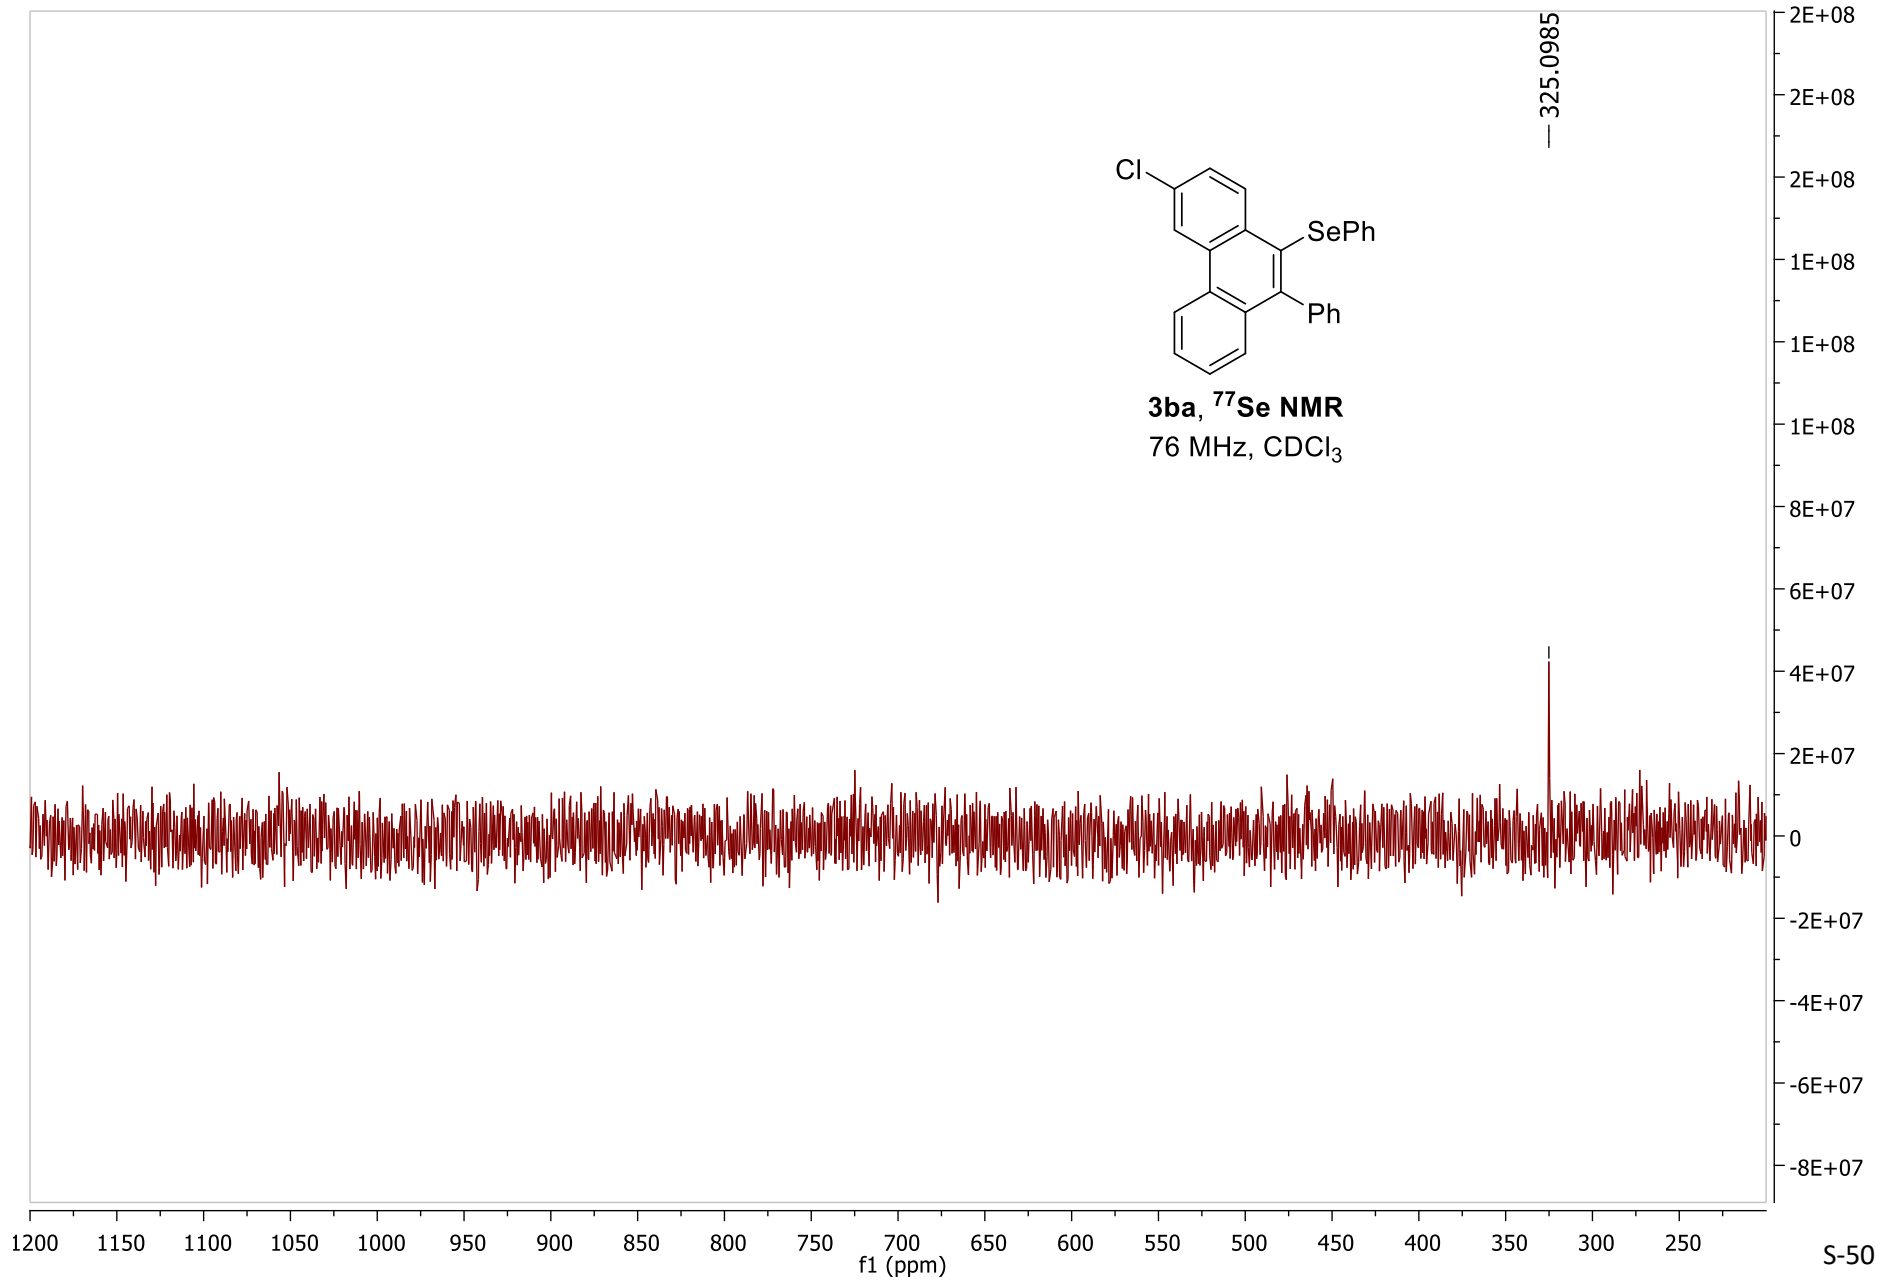

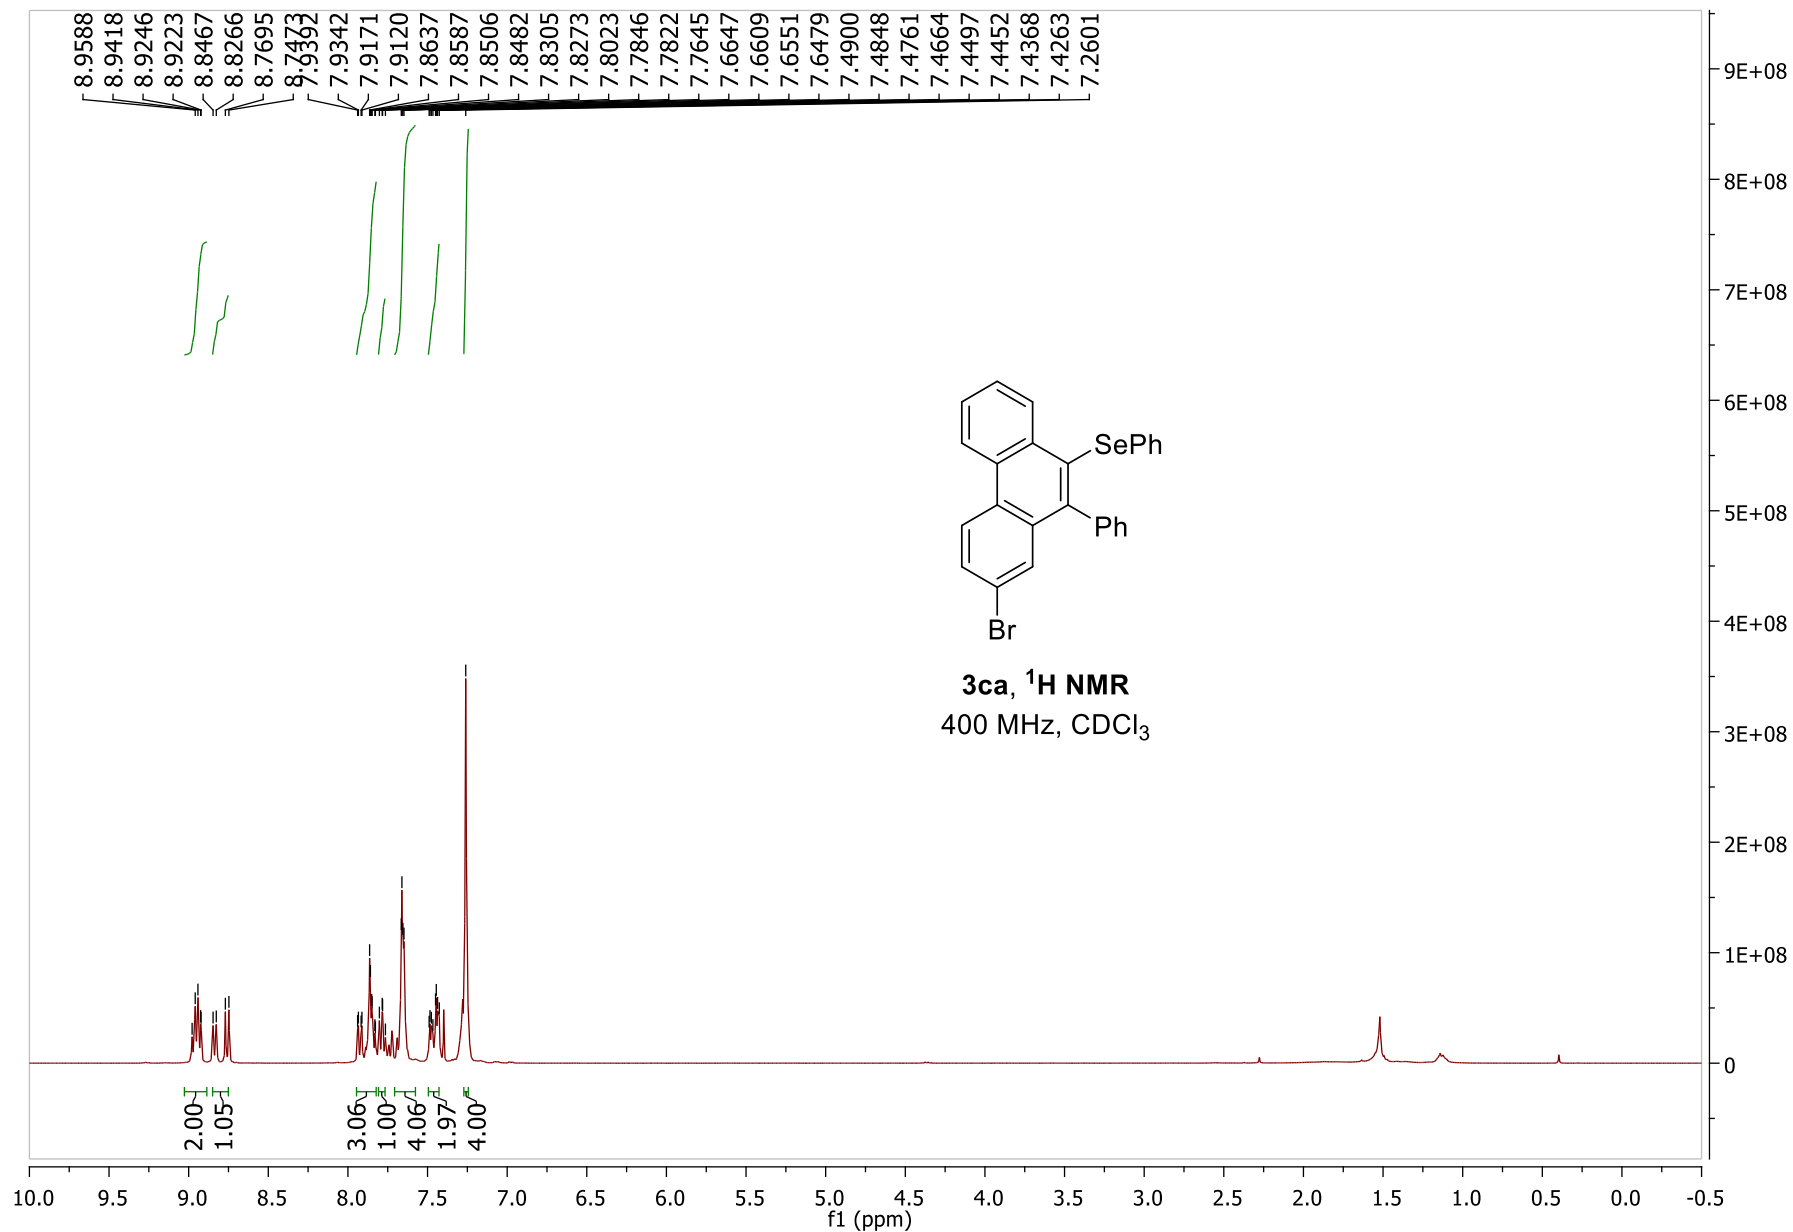

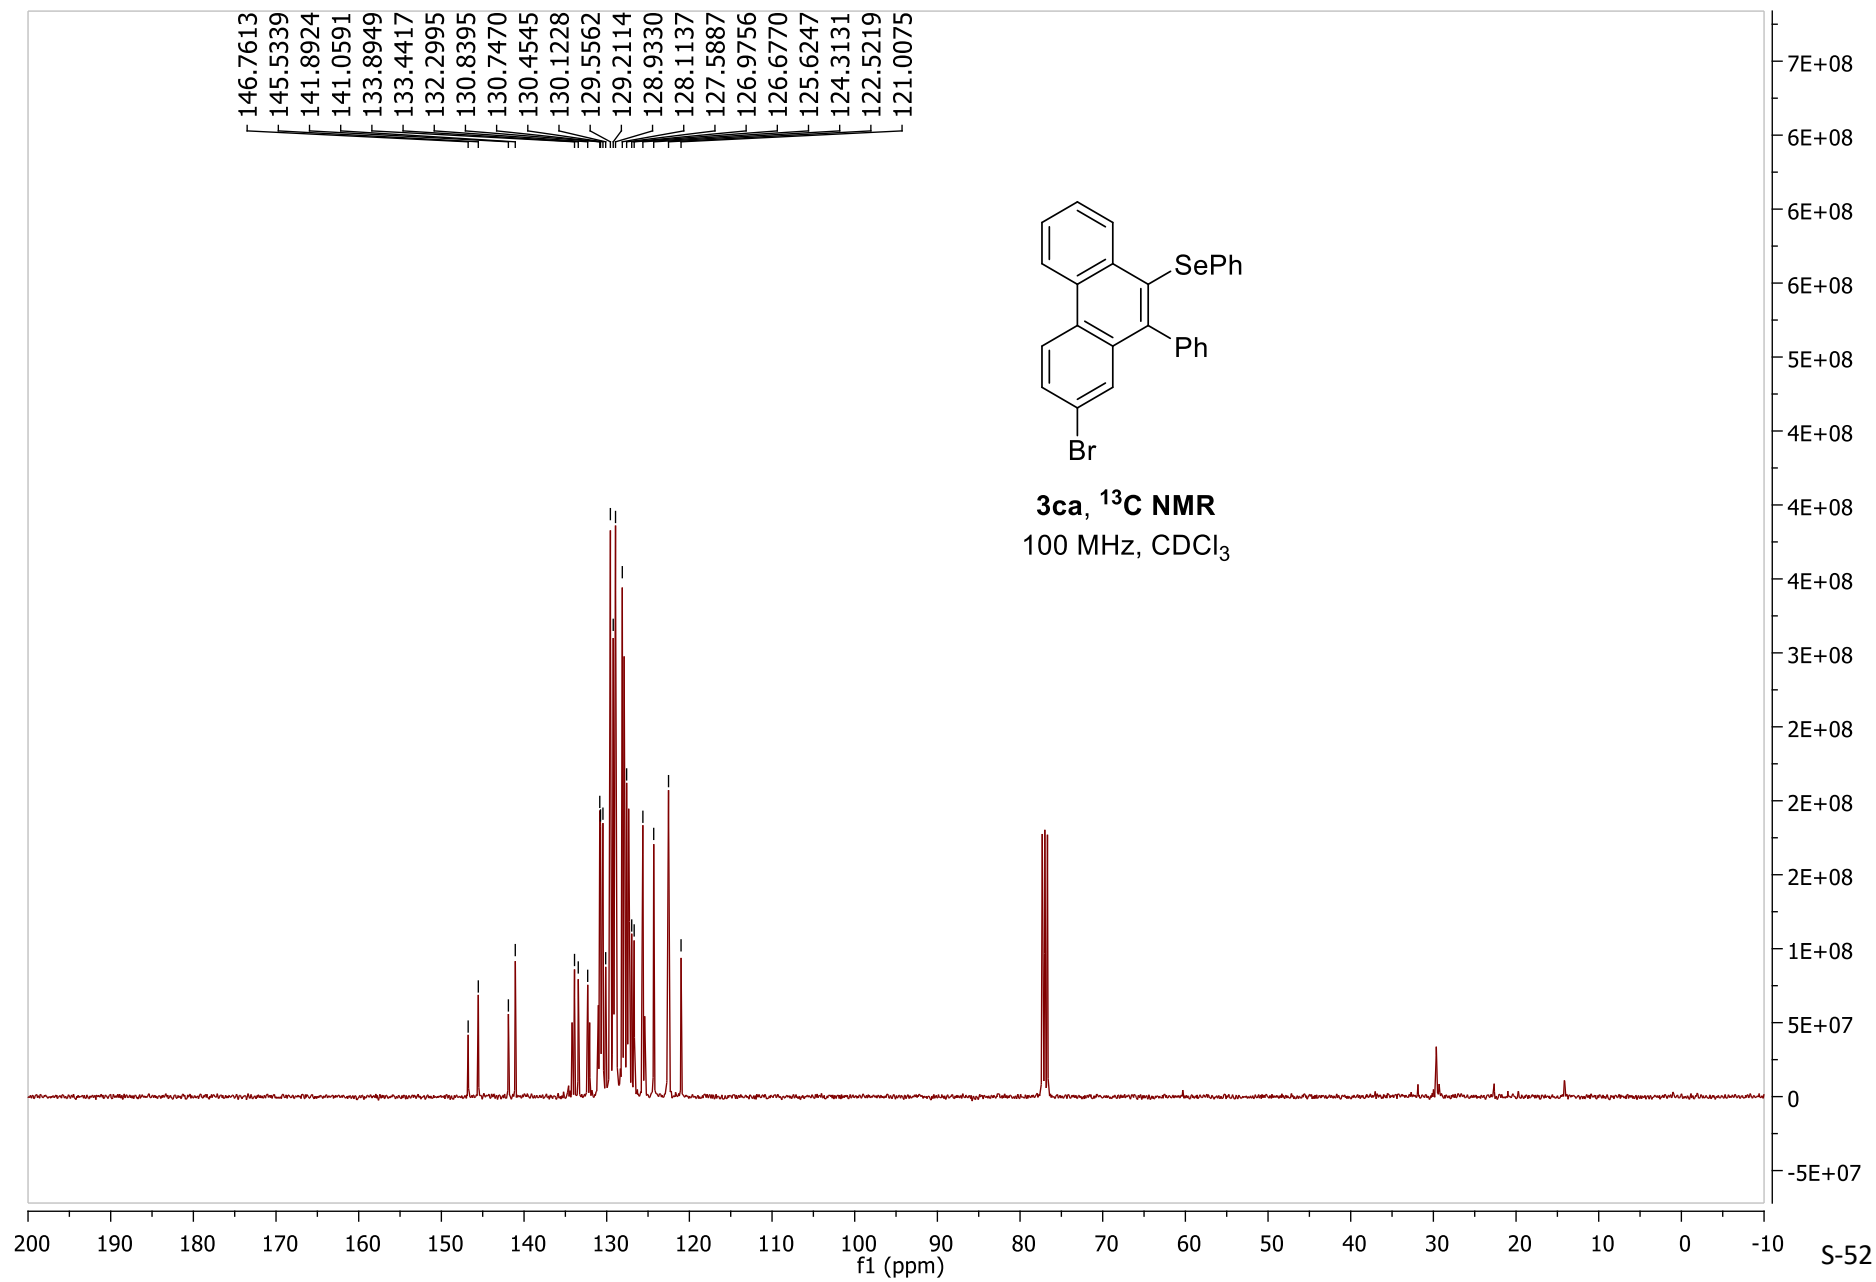

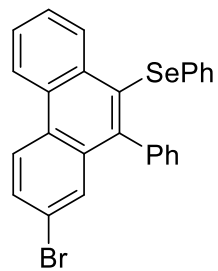

**3ca,  $^{77}\text{Se}$  NMR**  
76 MHz,  $\text{CDCl}_3$

— 328.3374

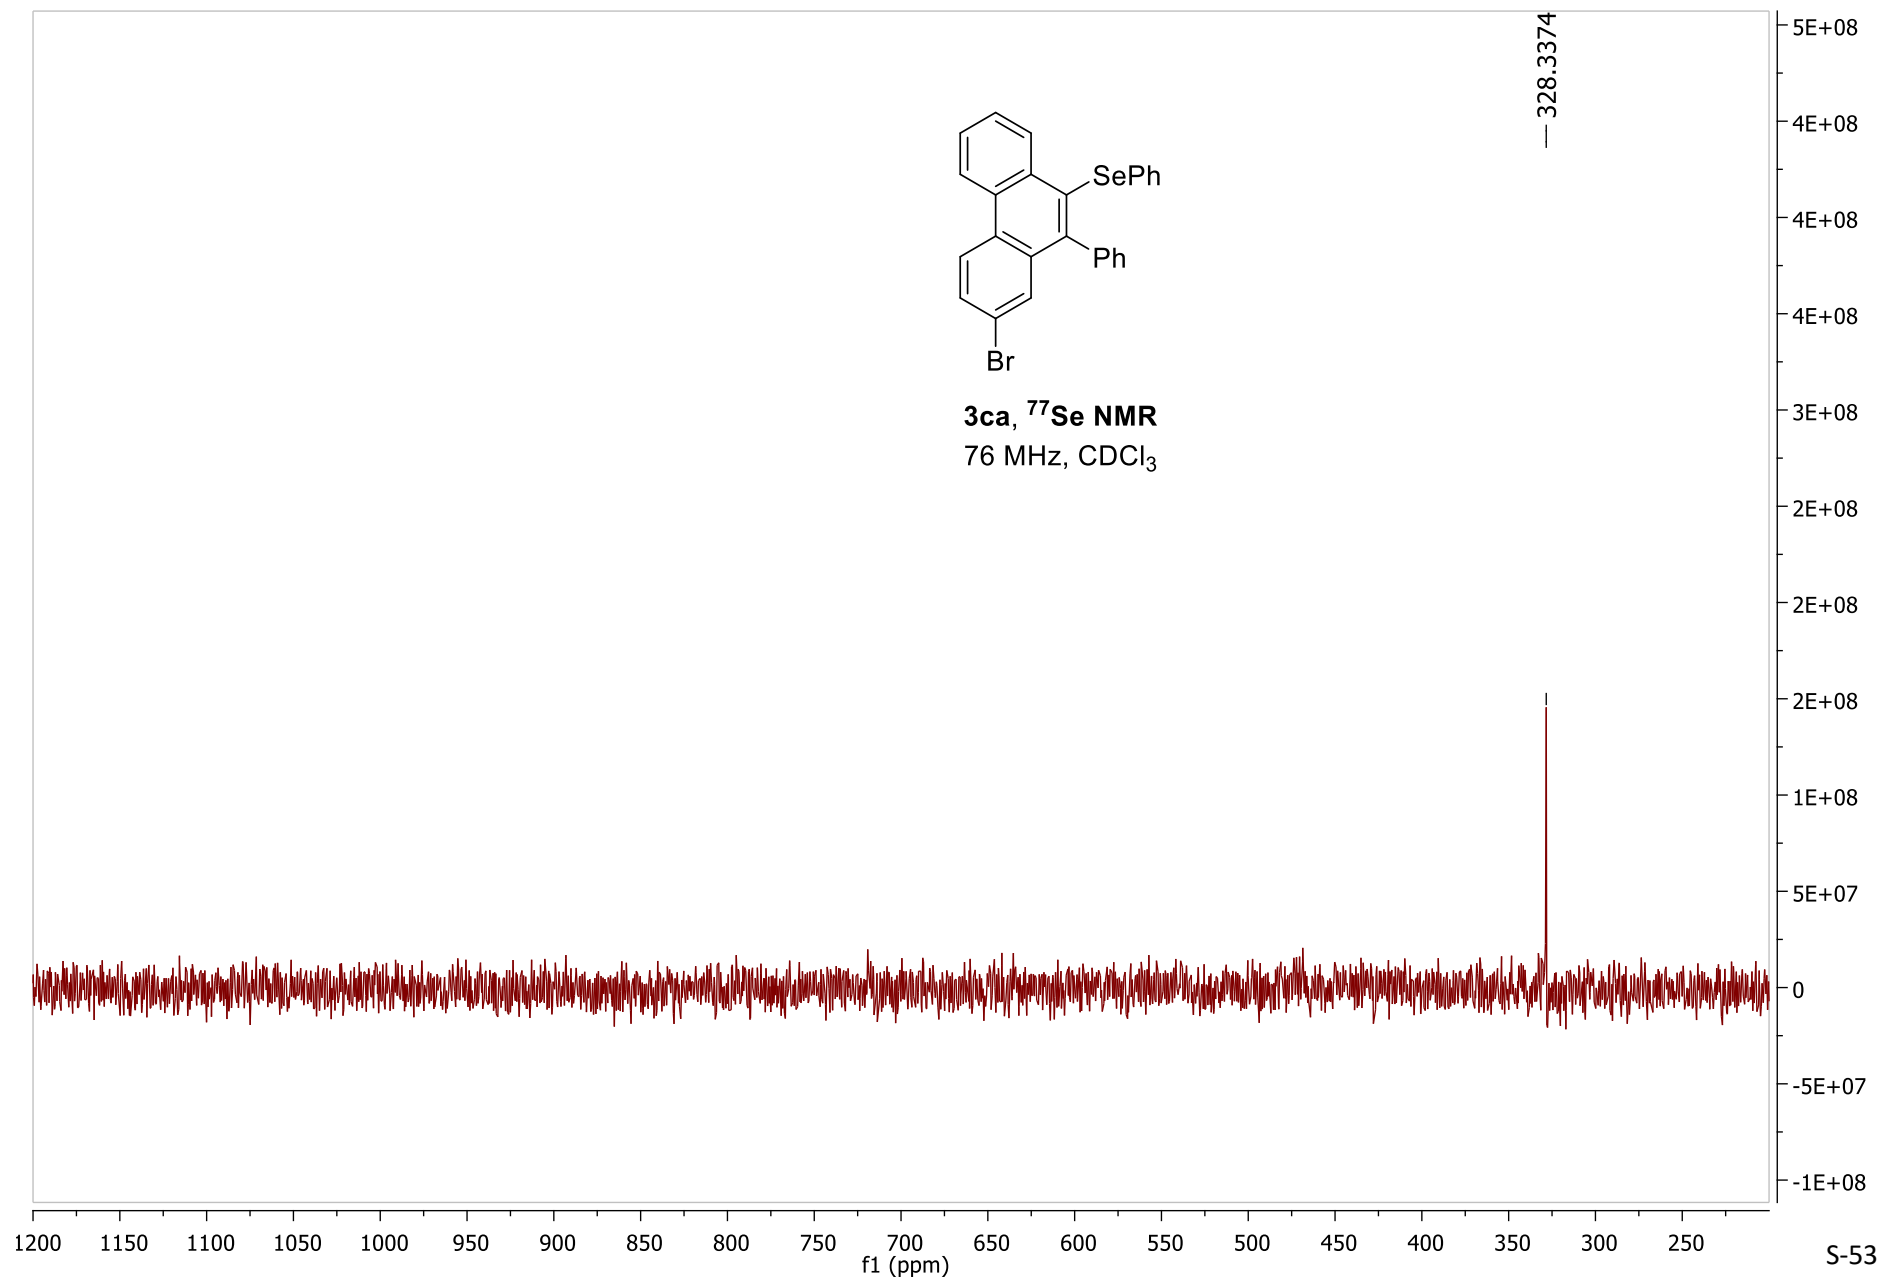

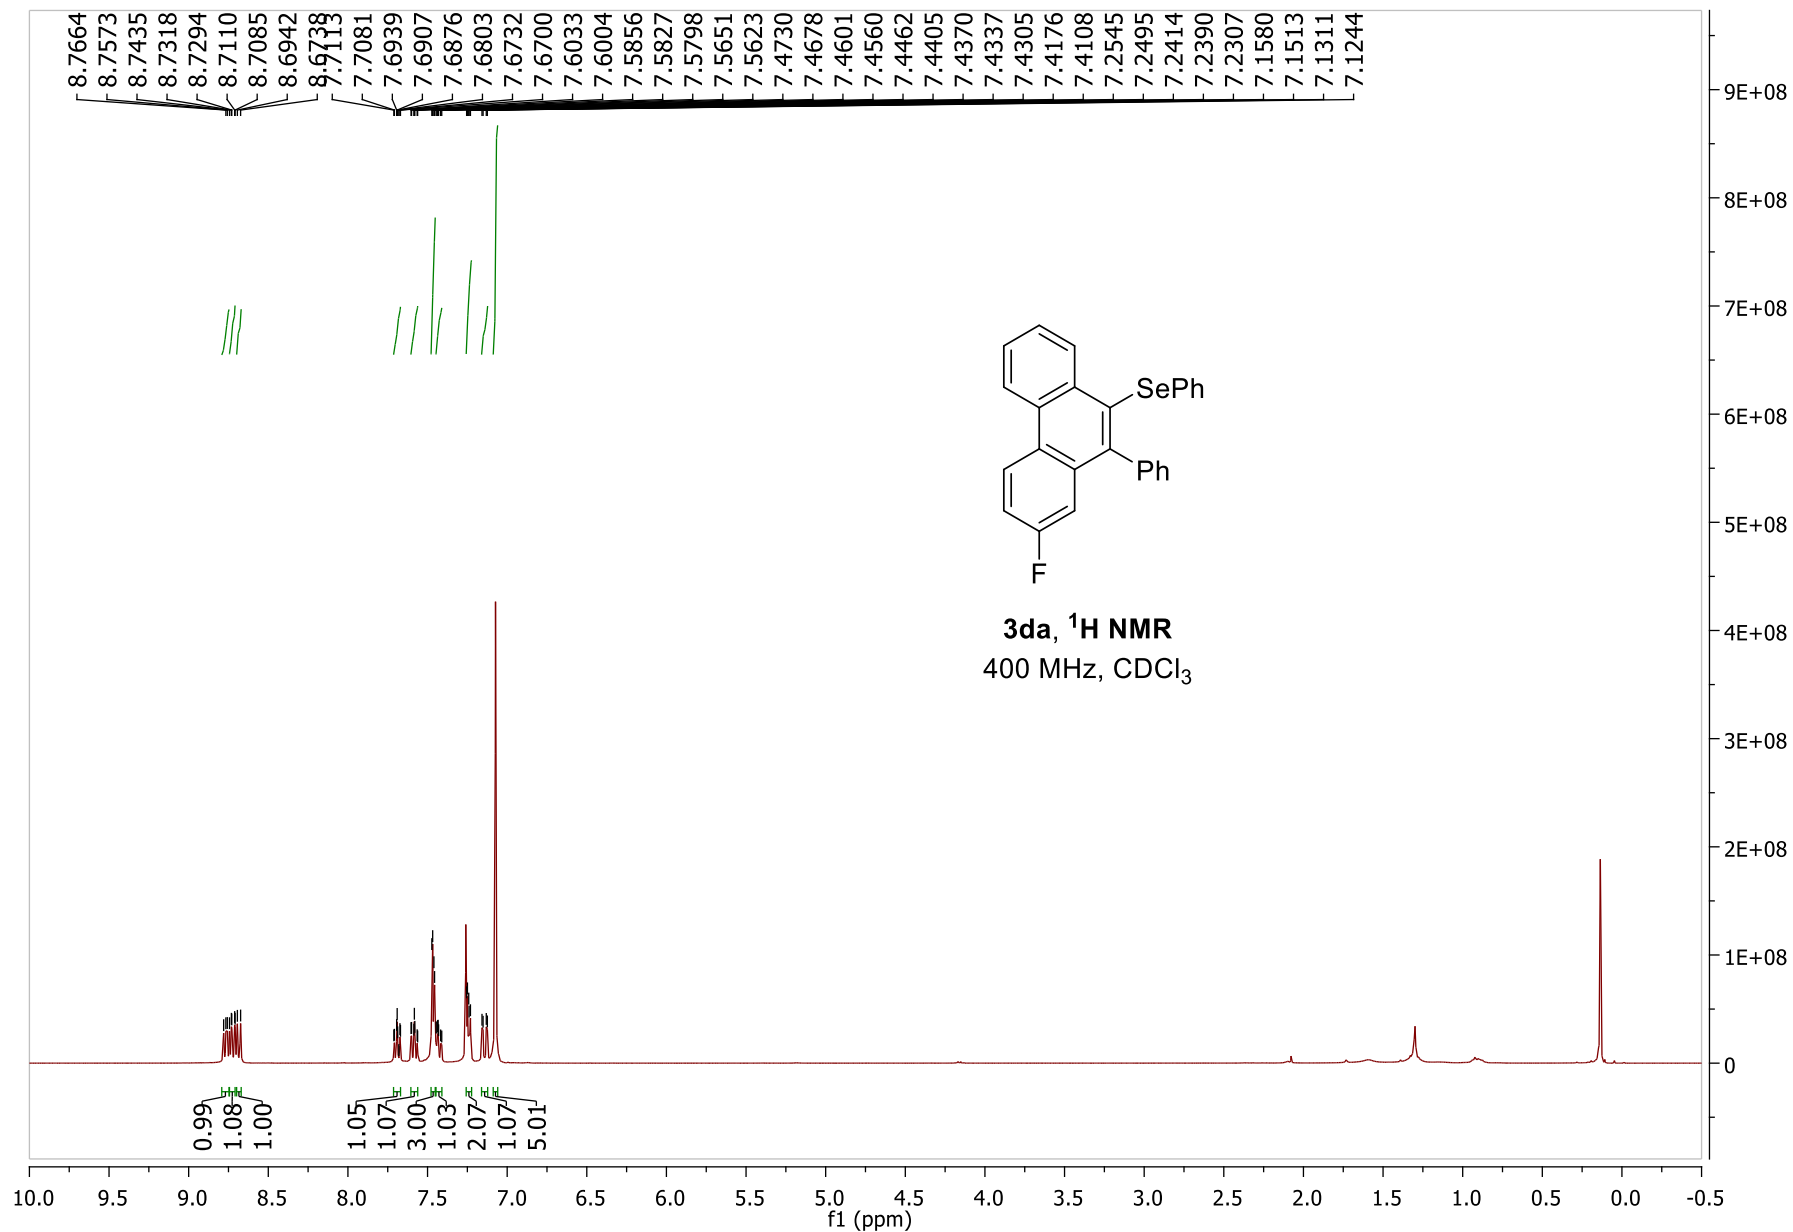

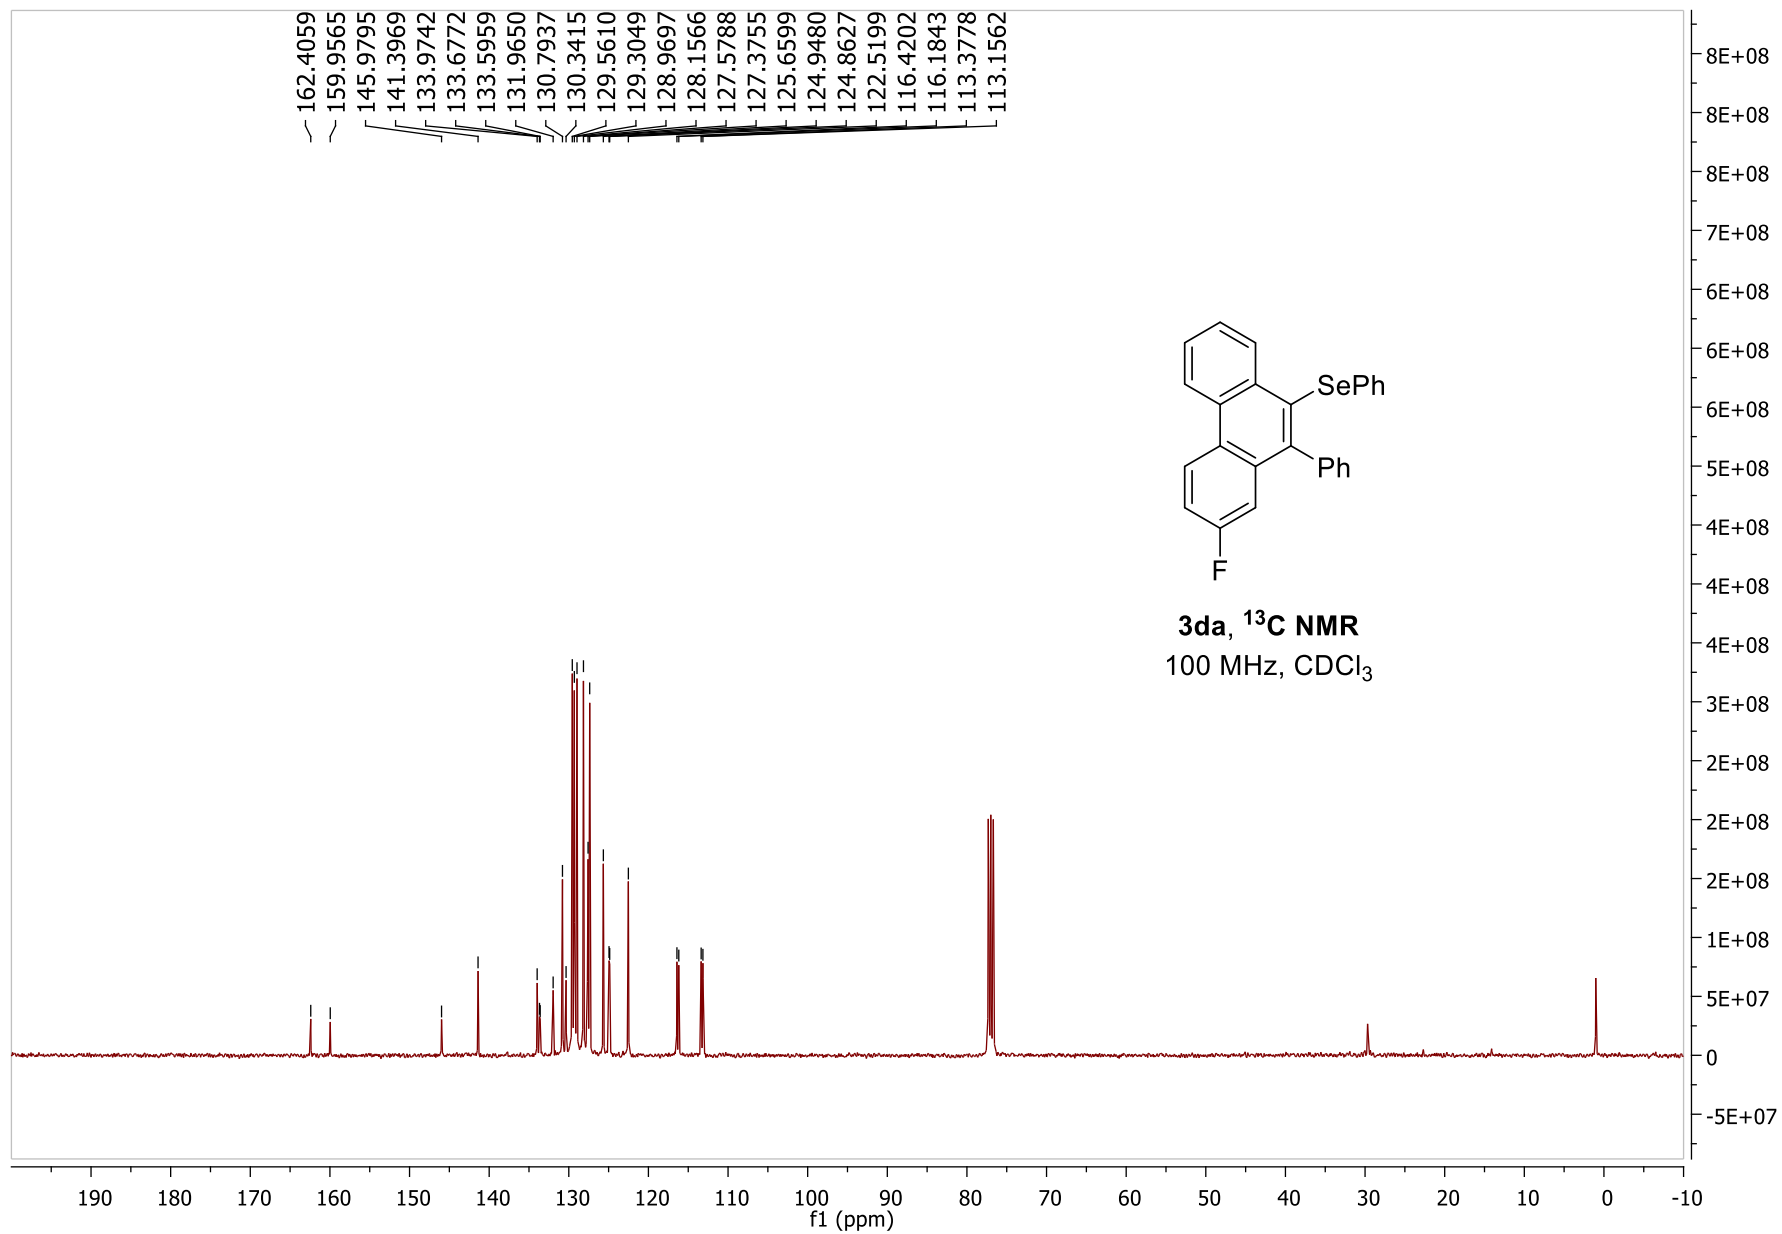

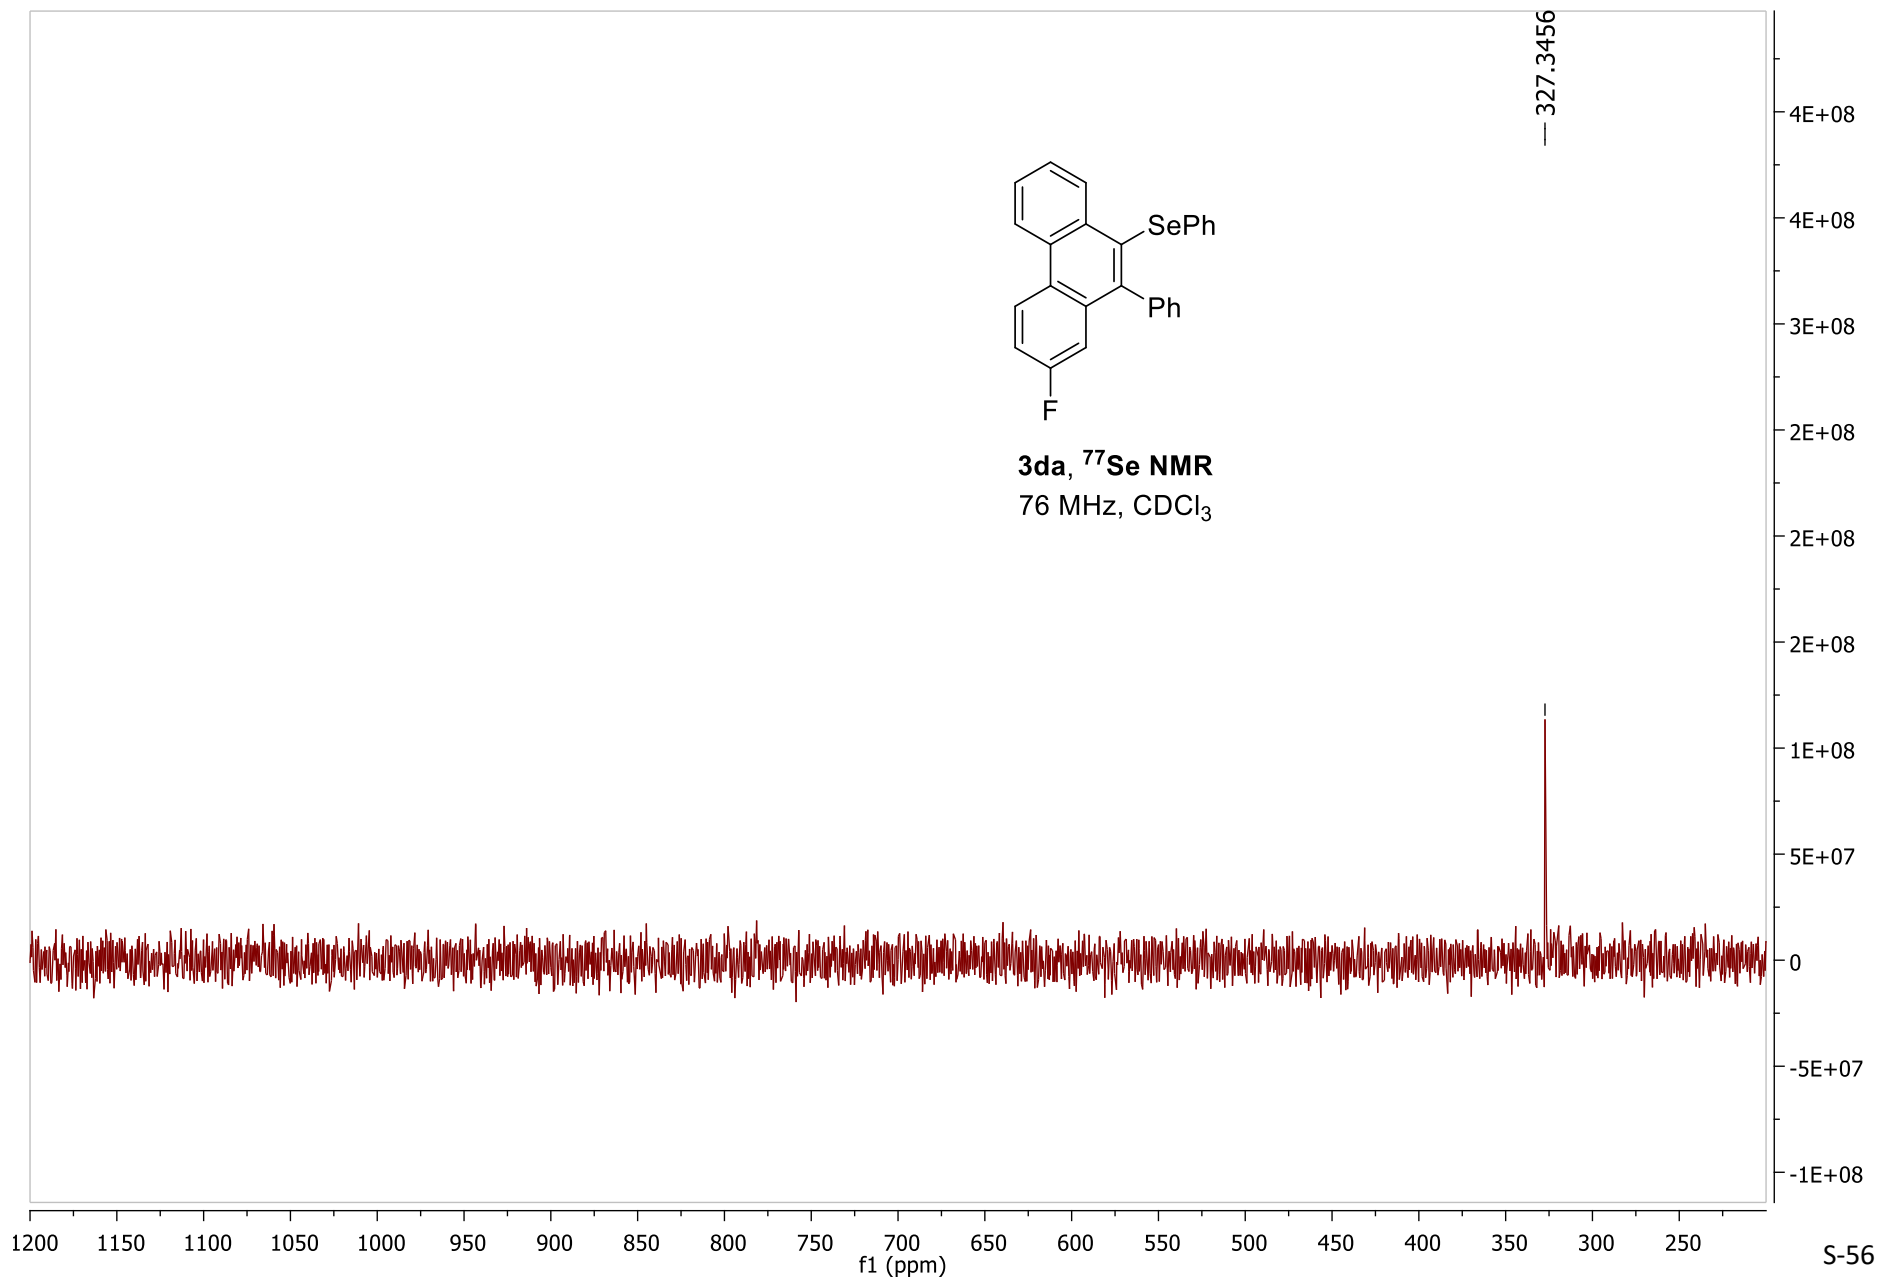

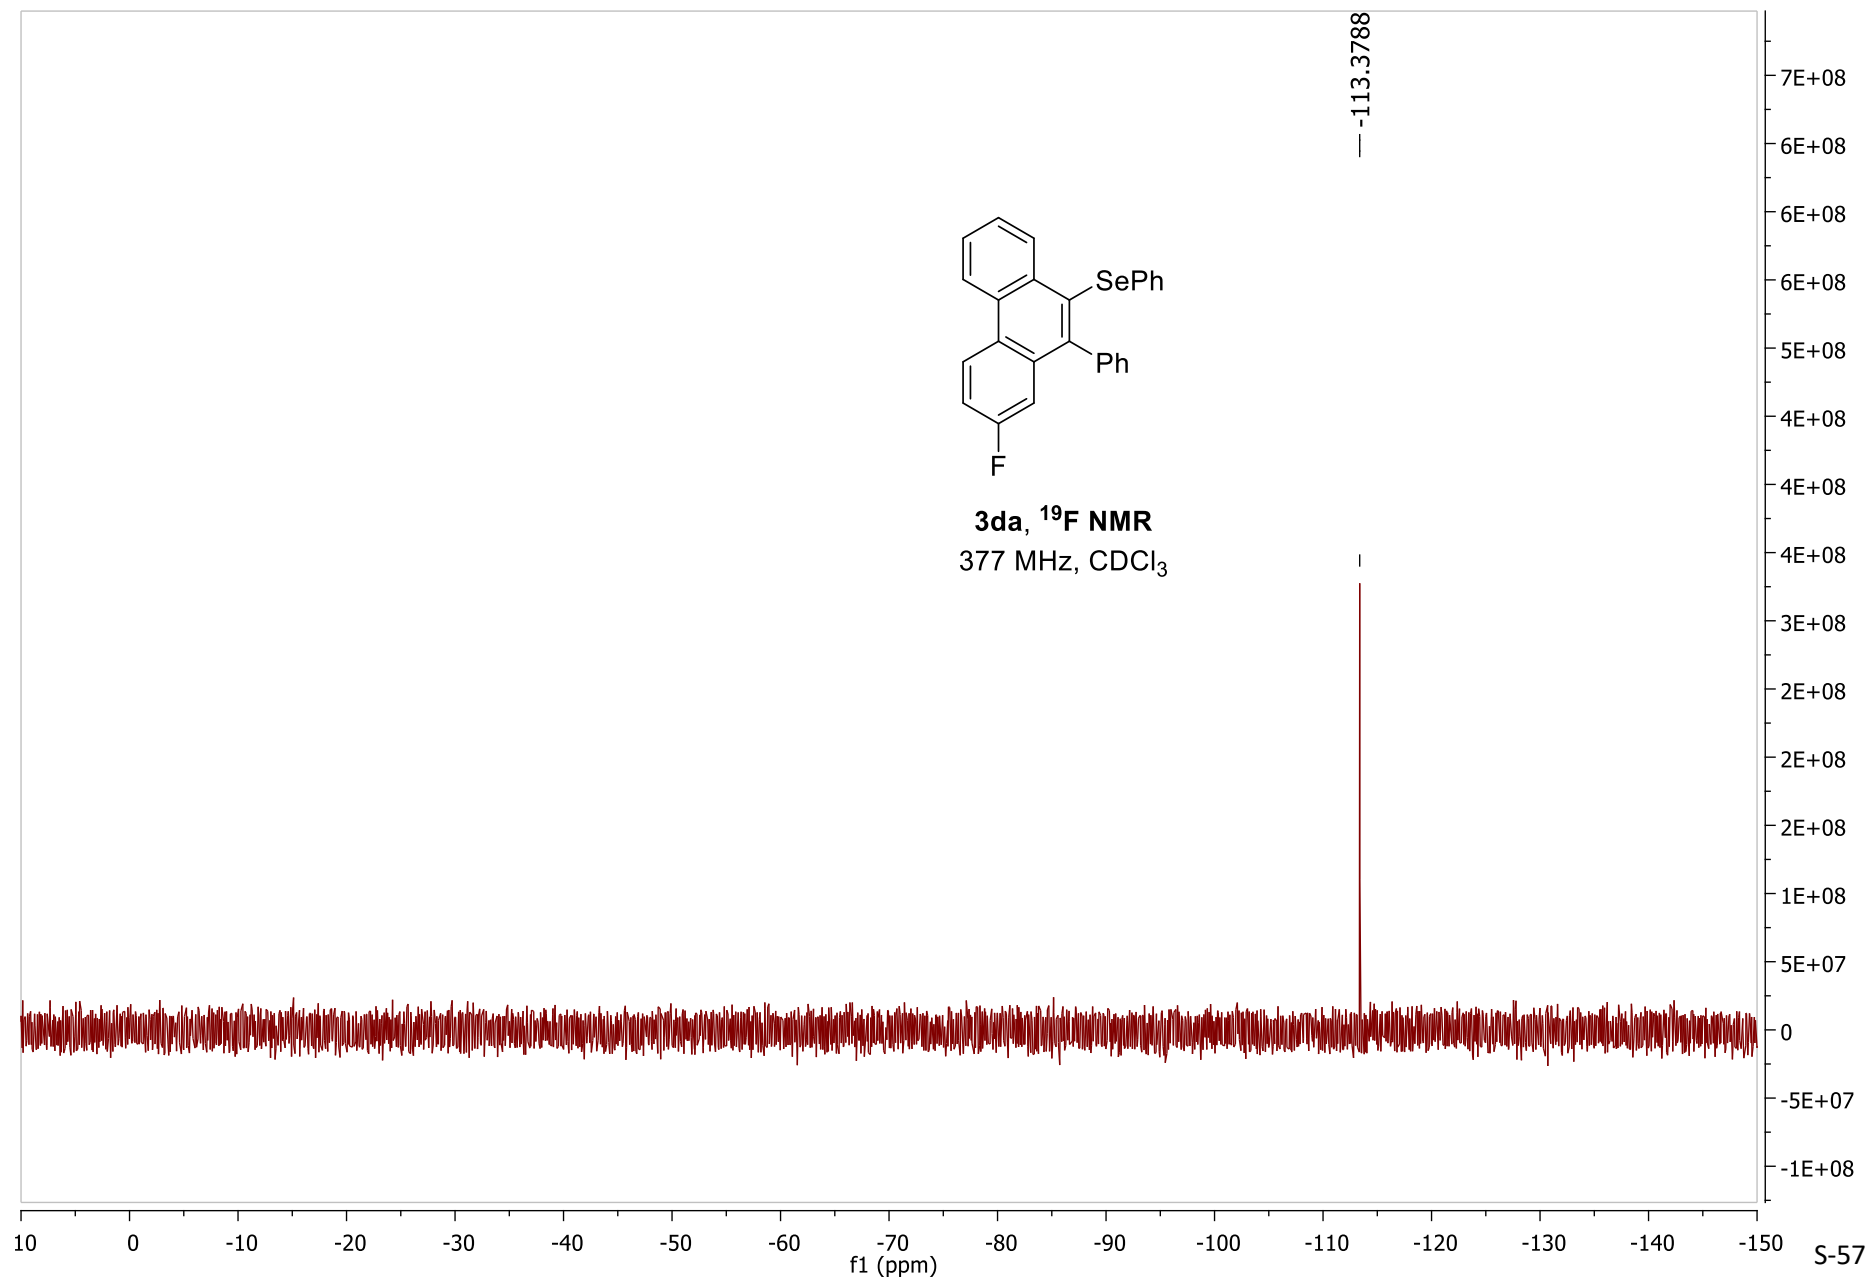

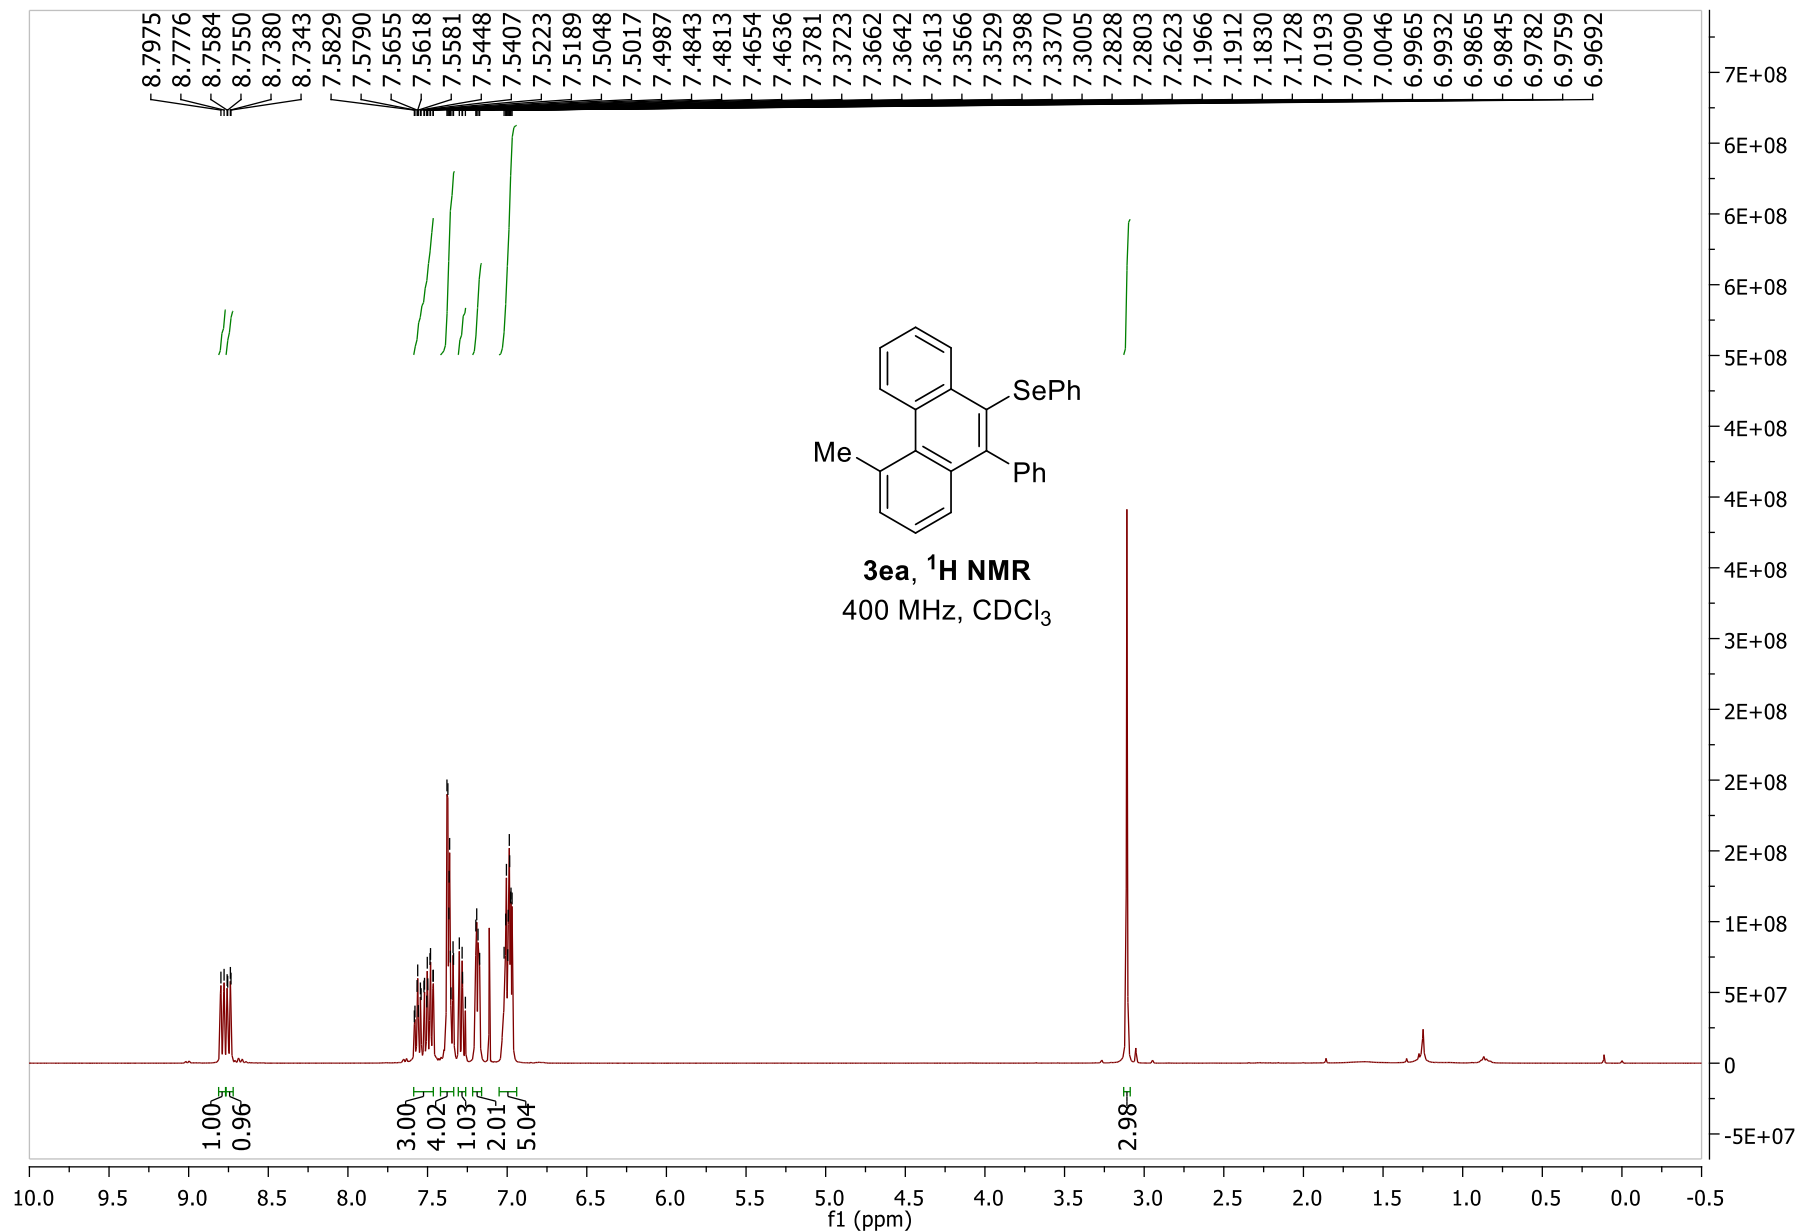

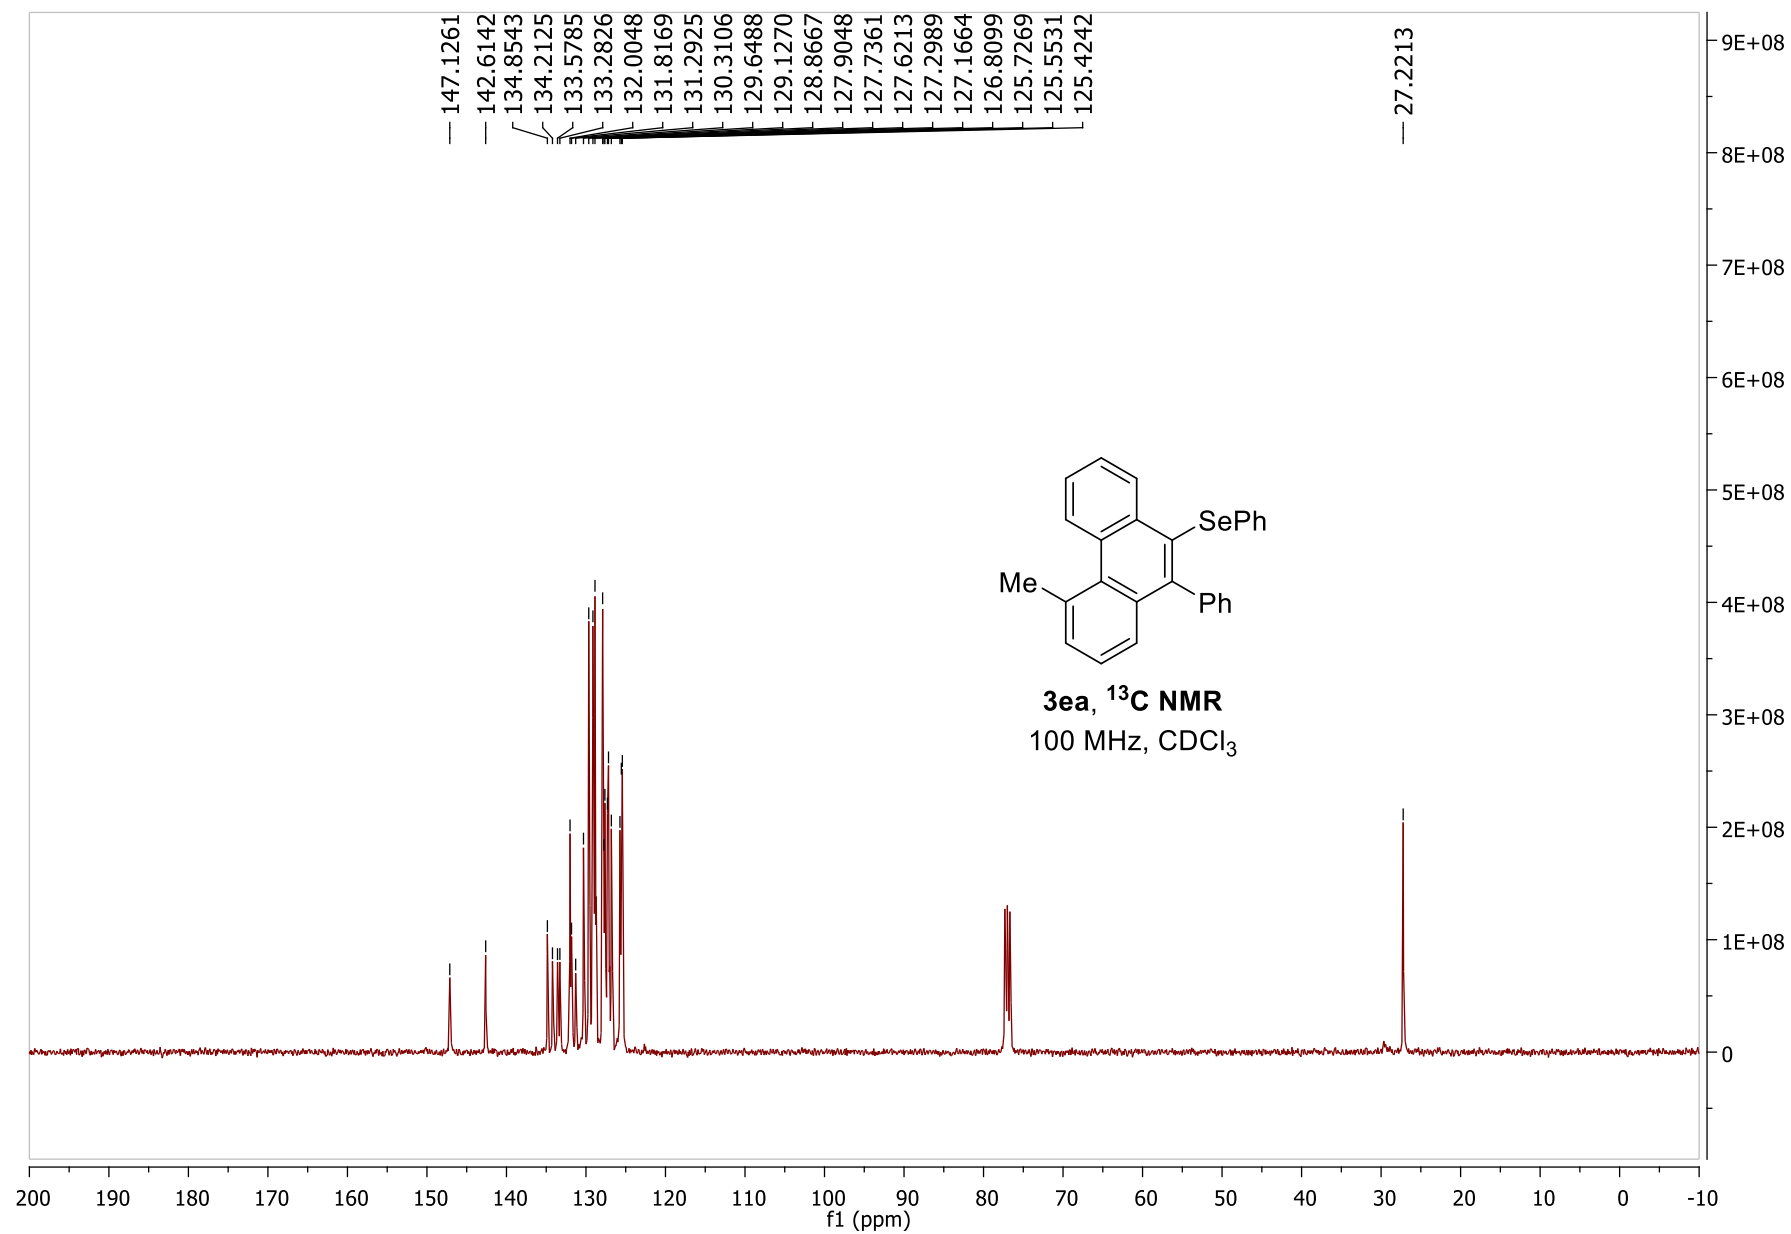

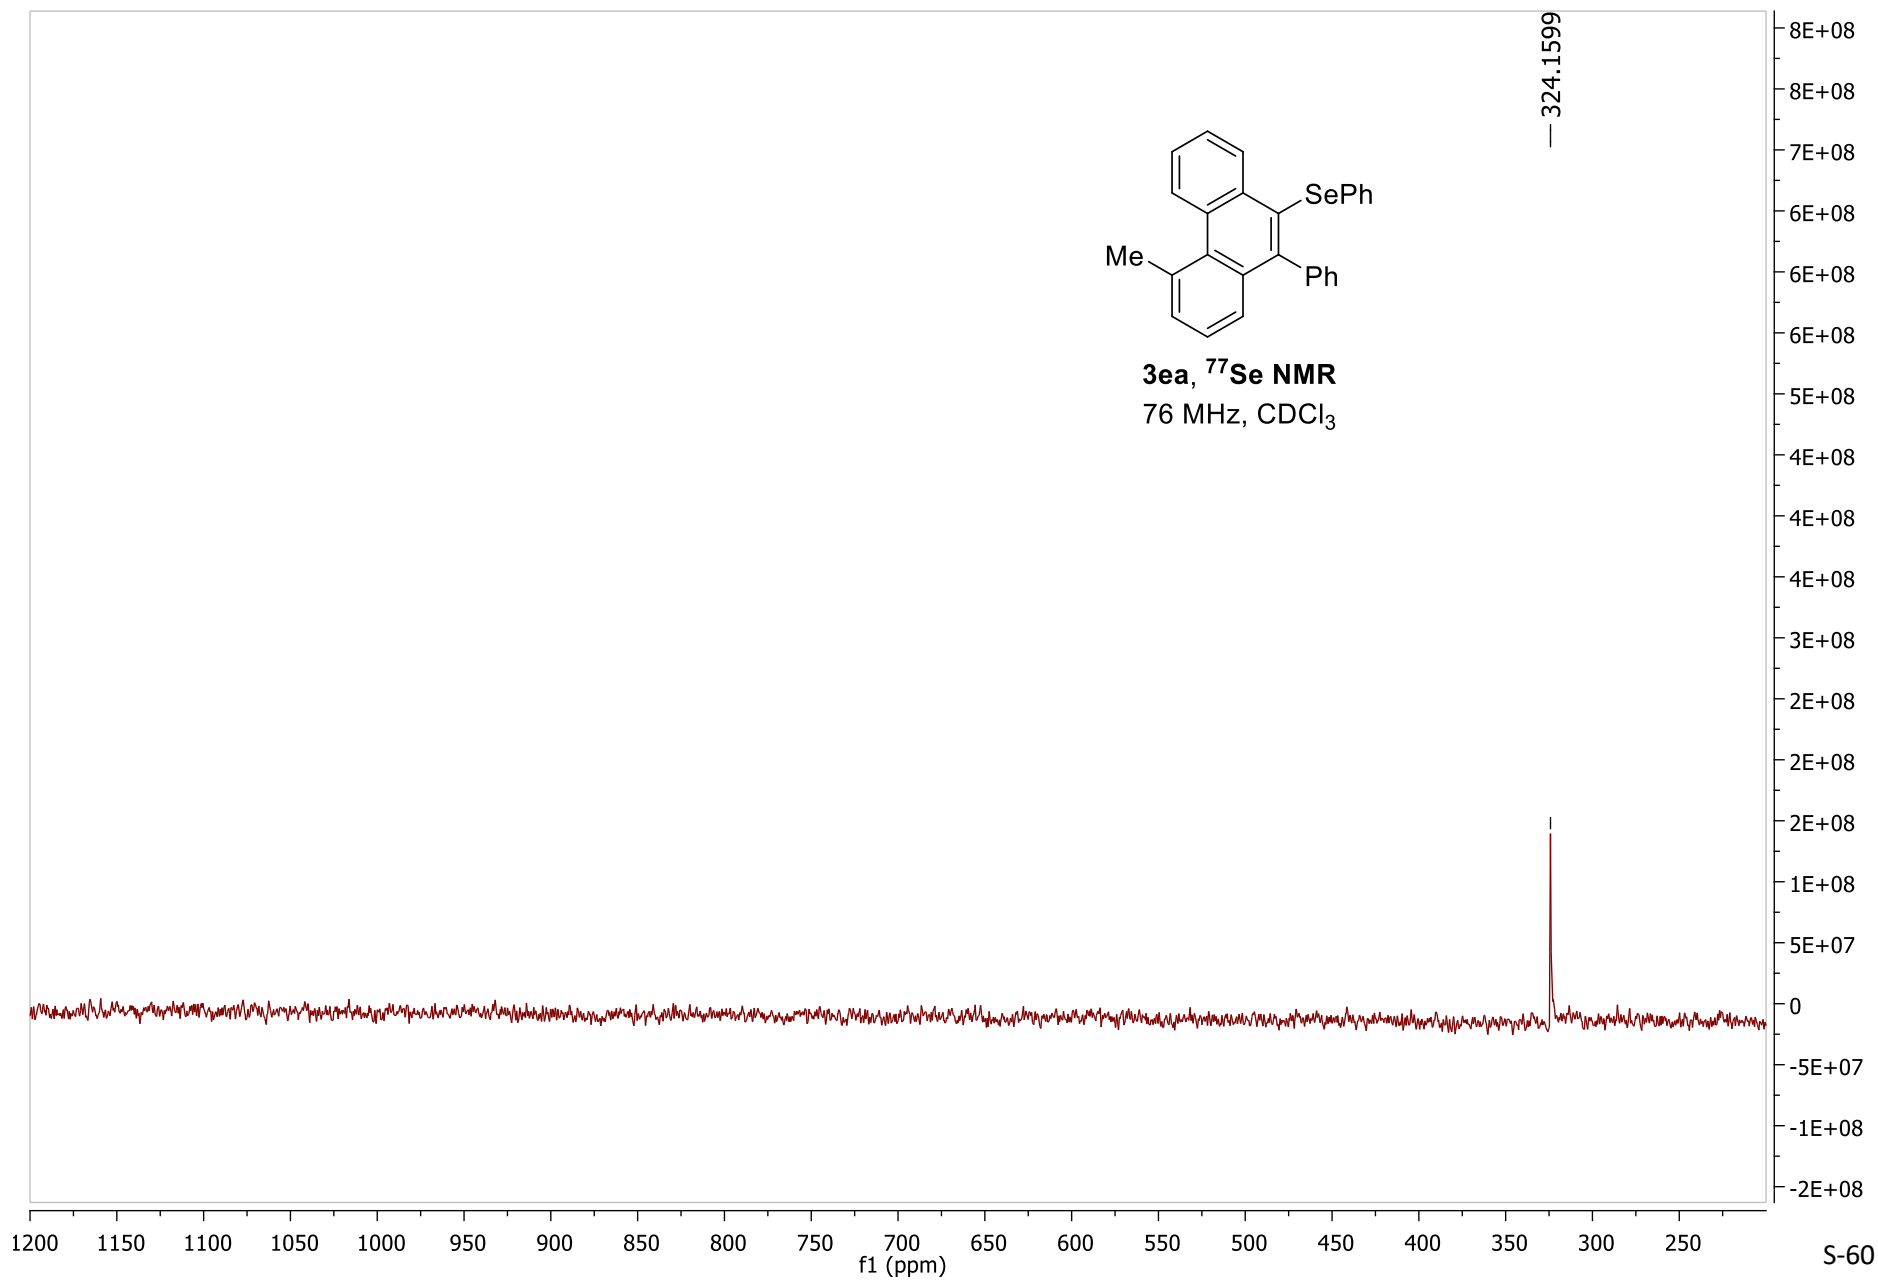

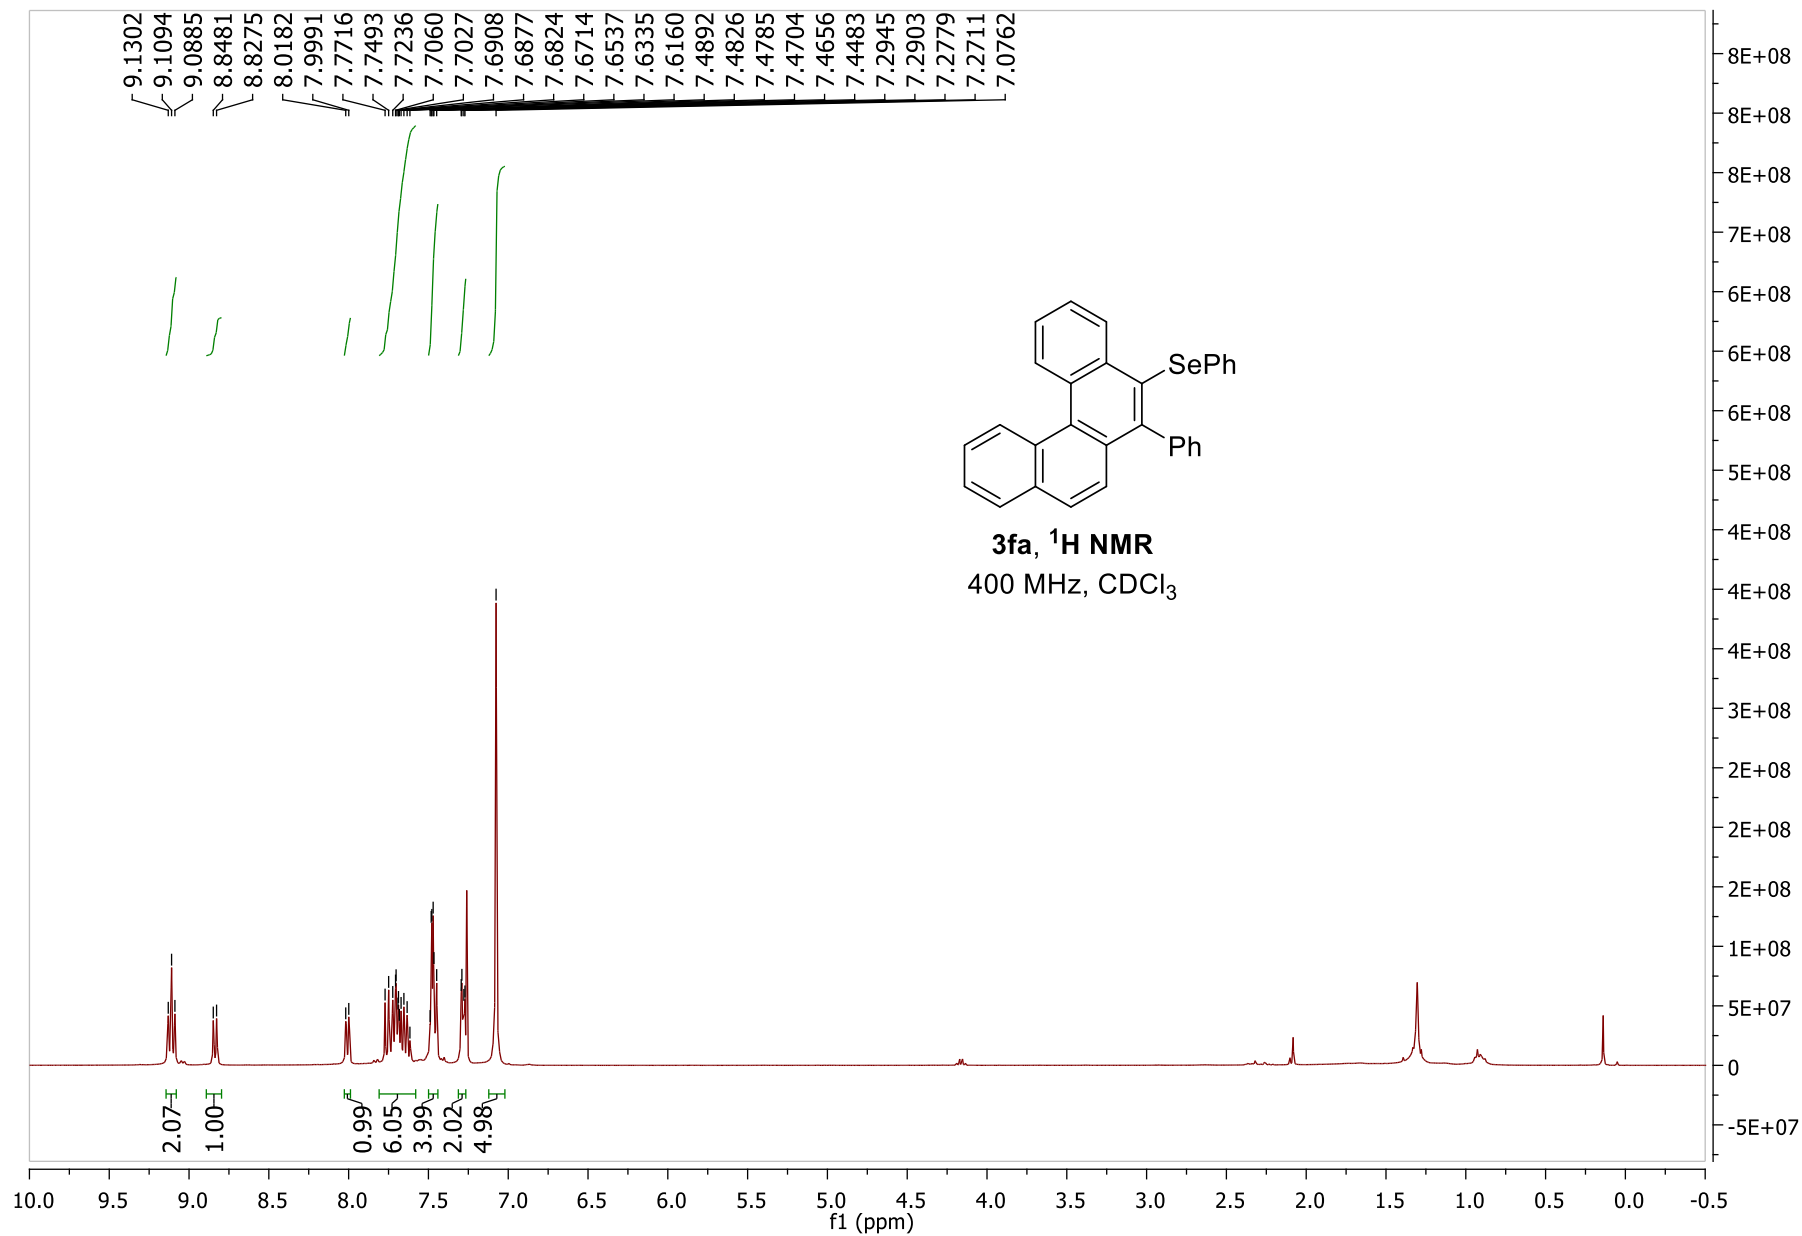

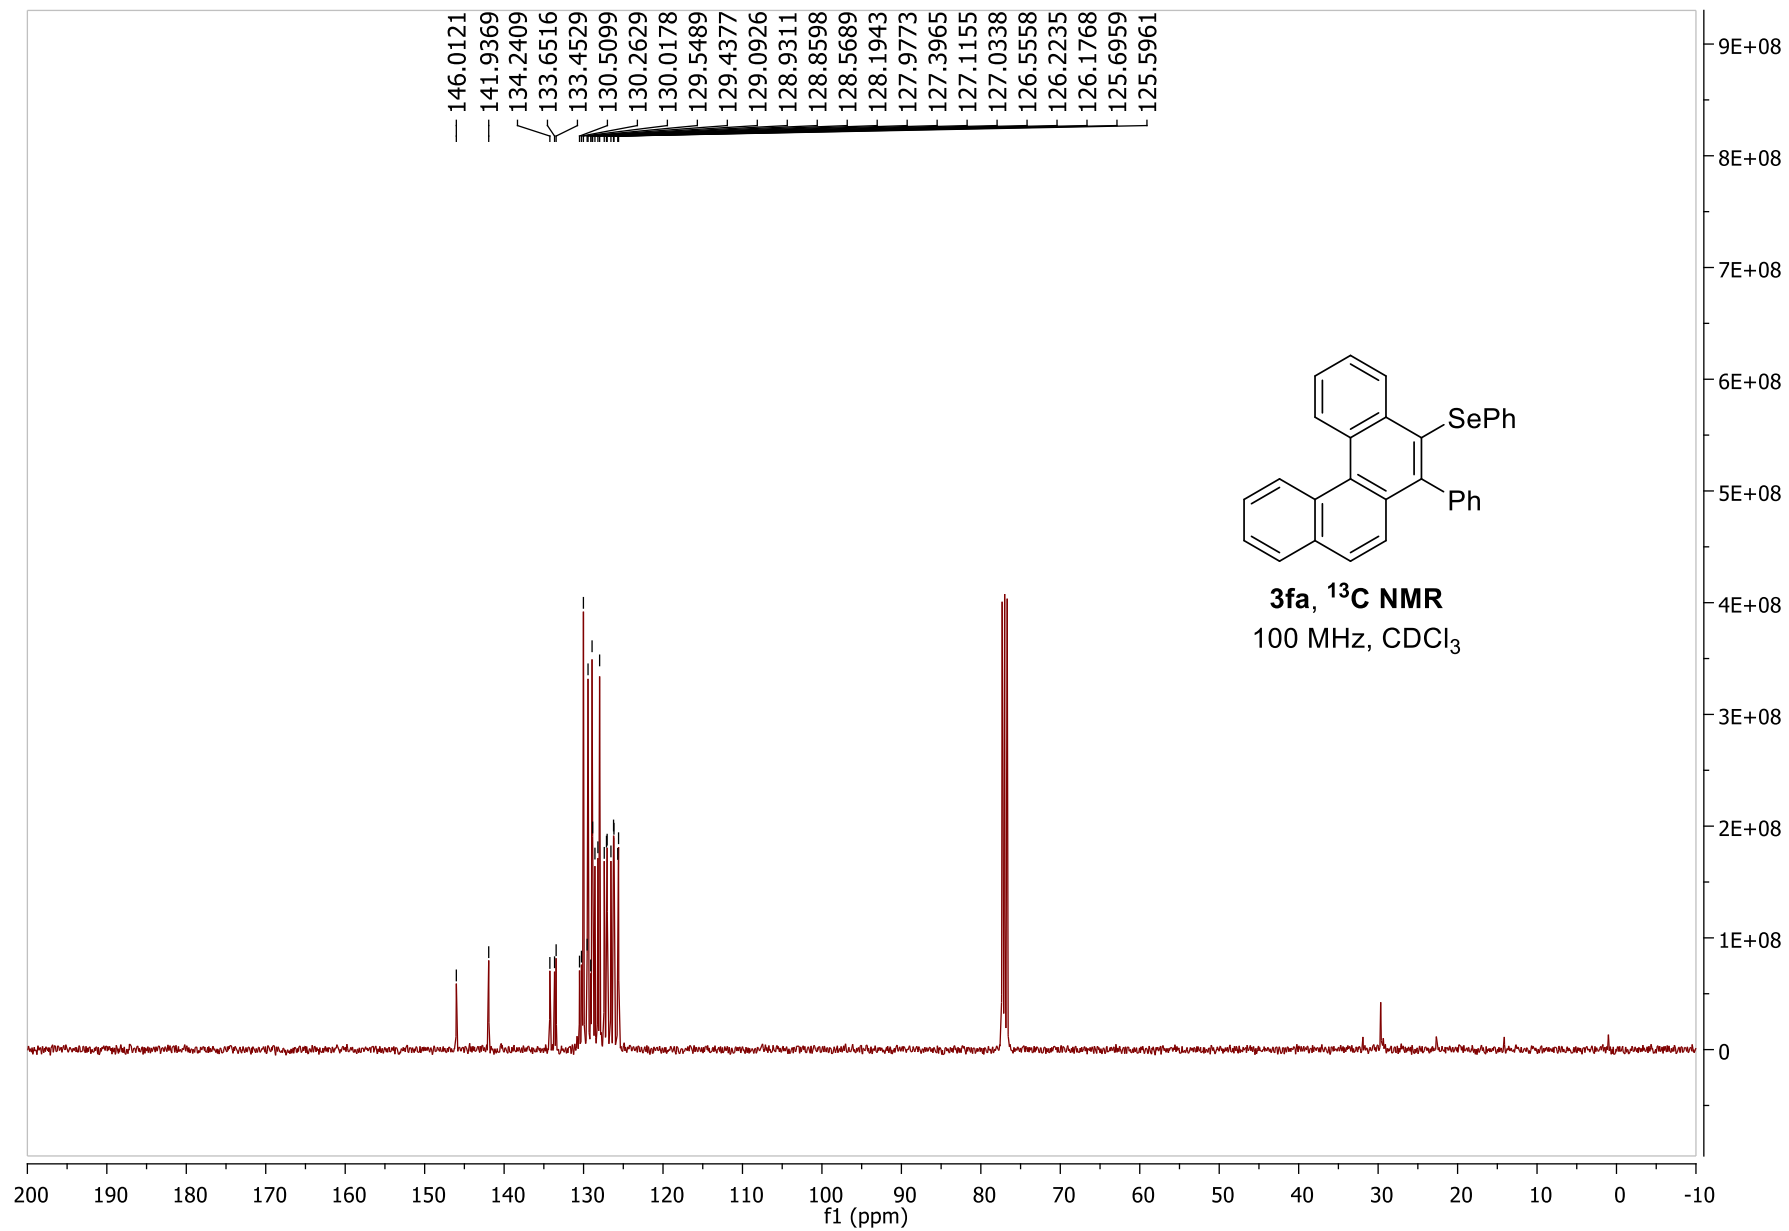

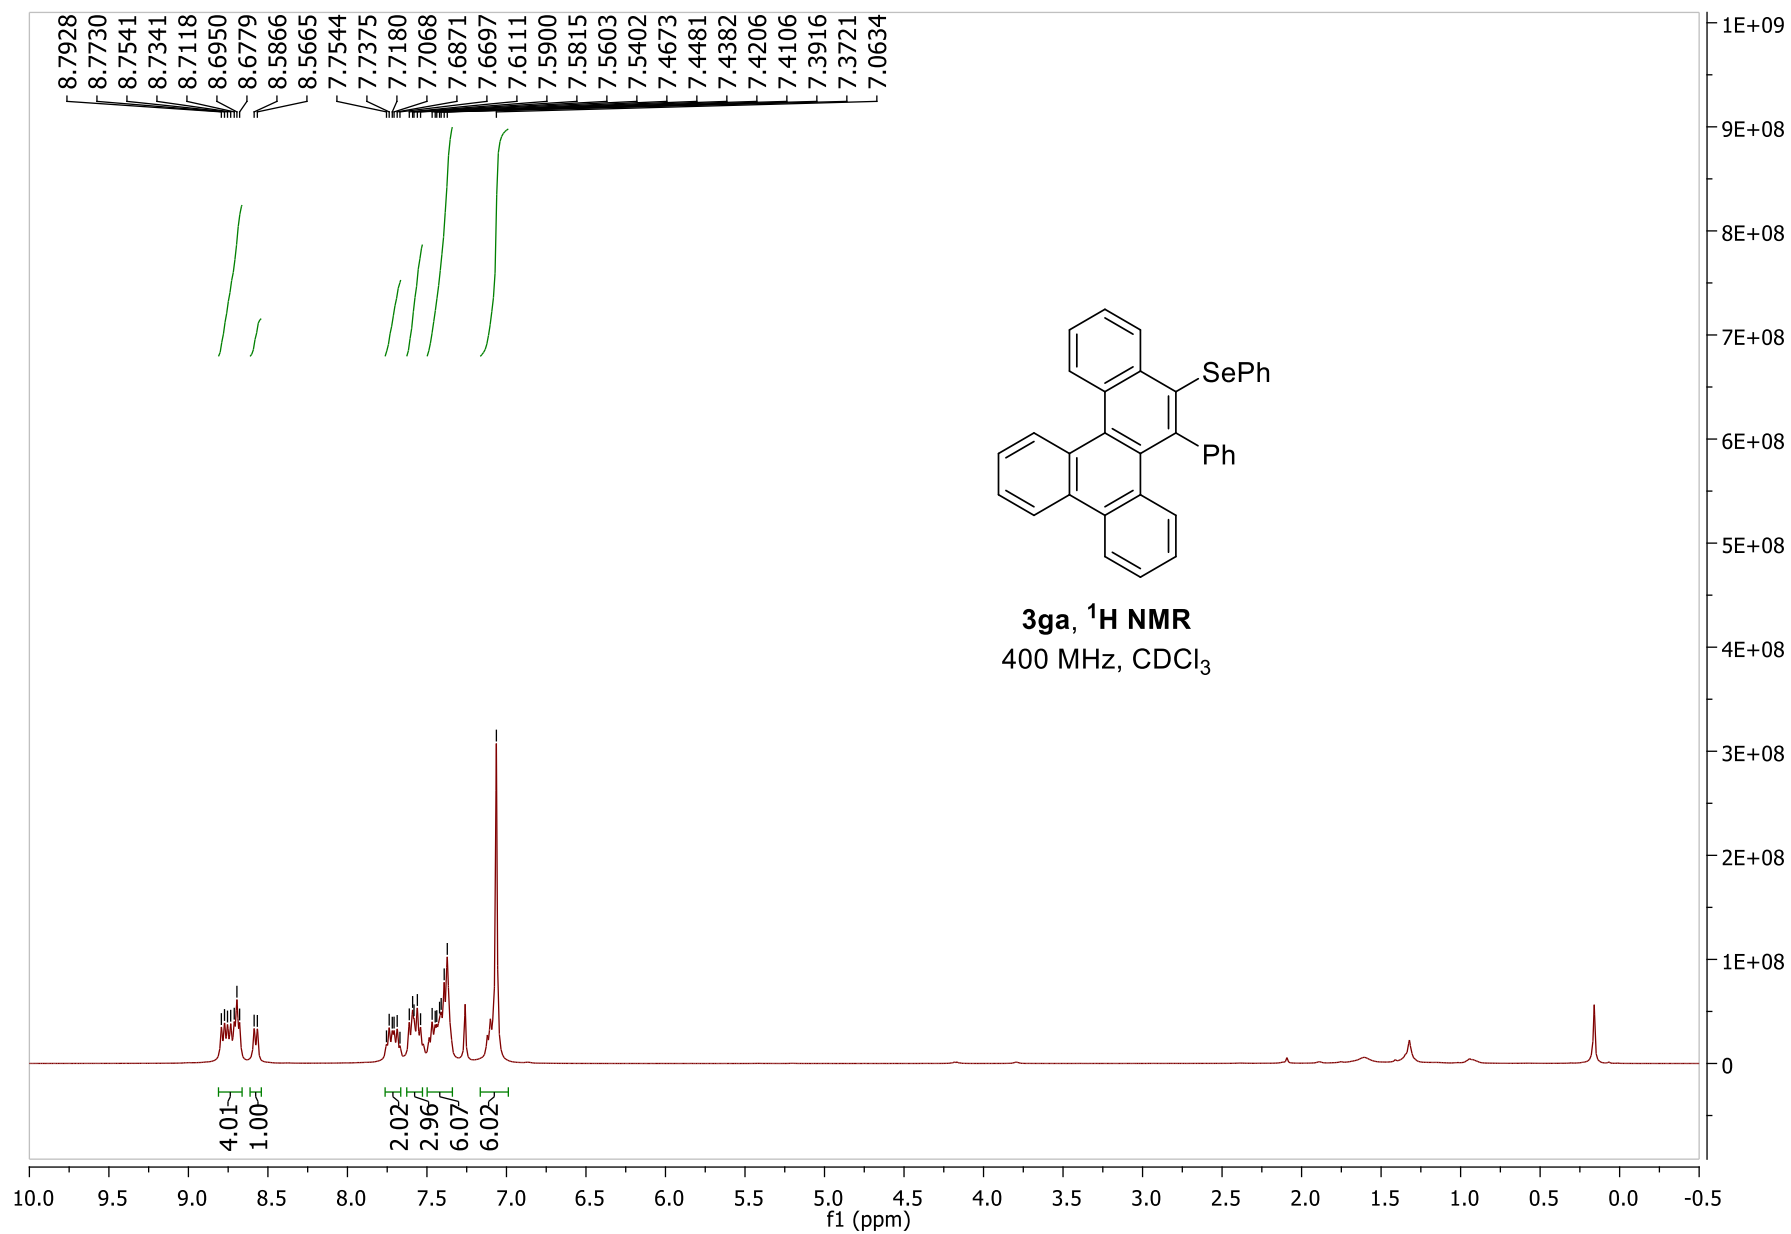

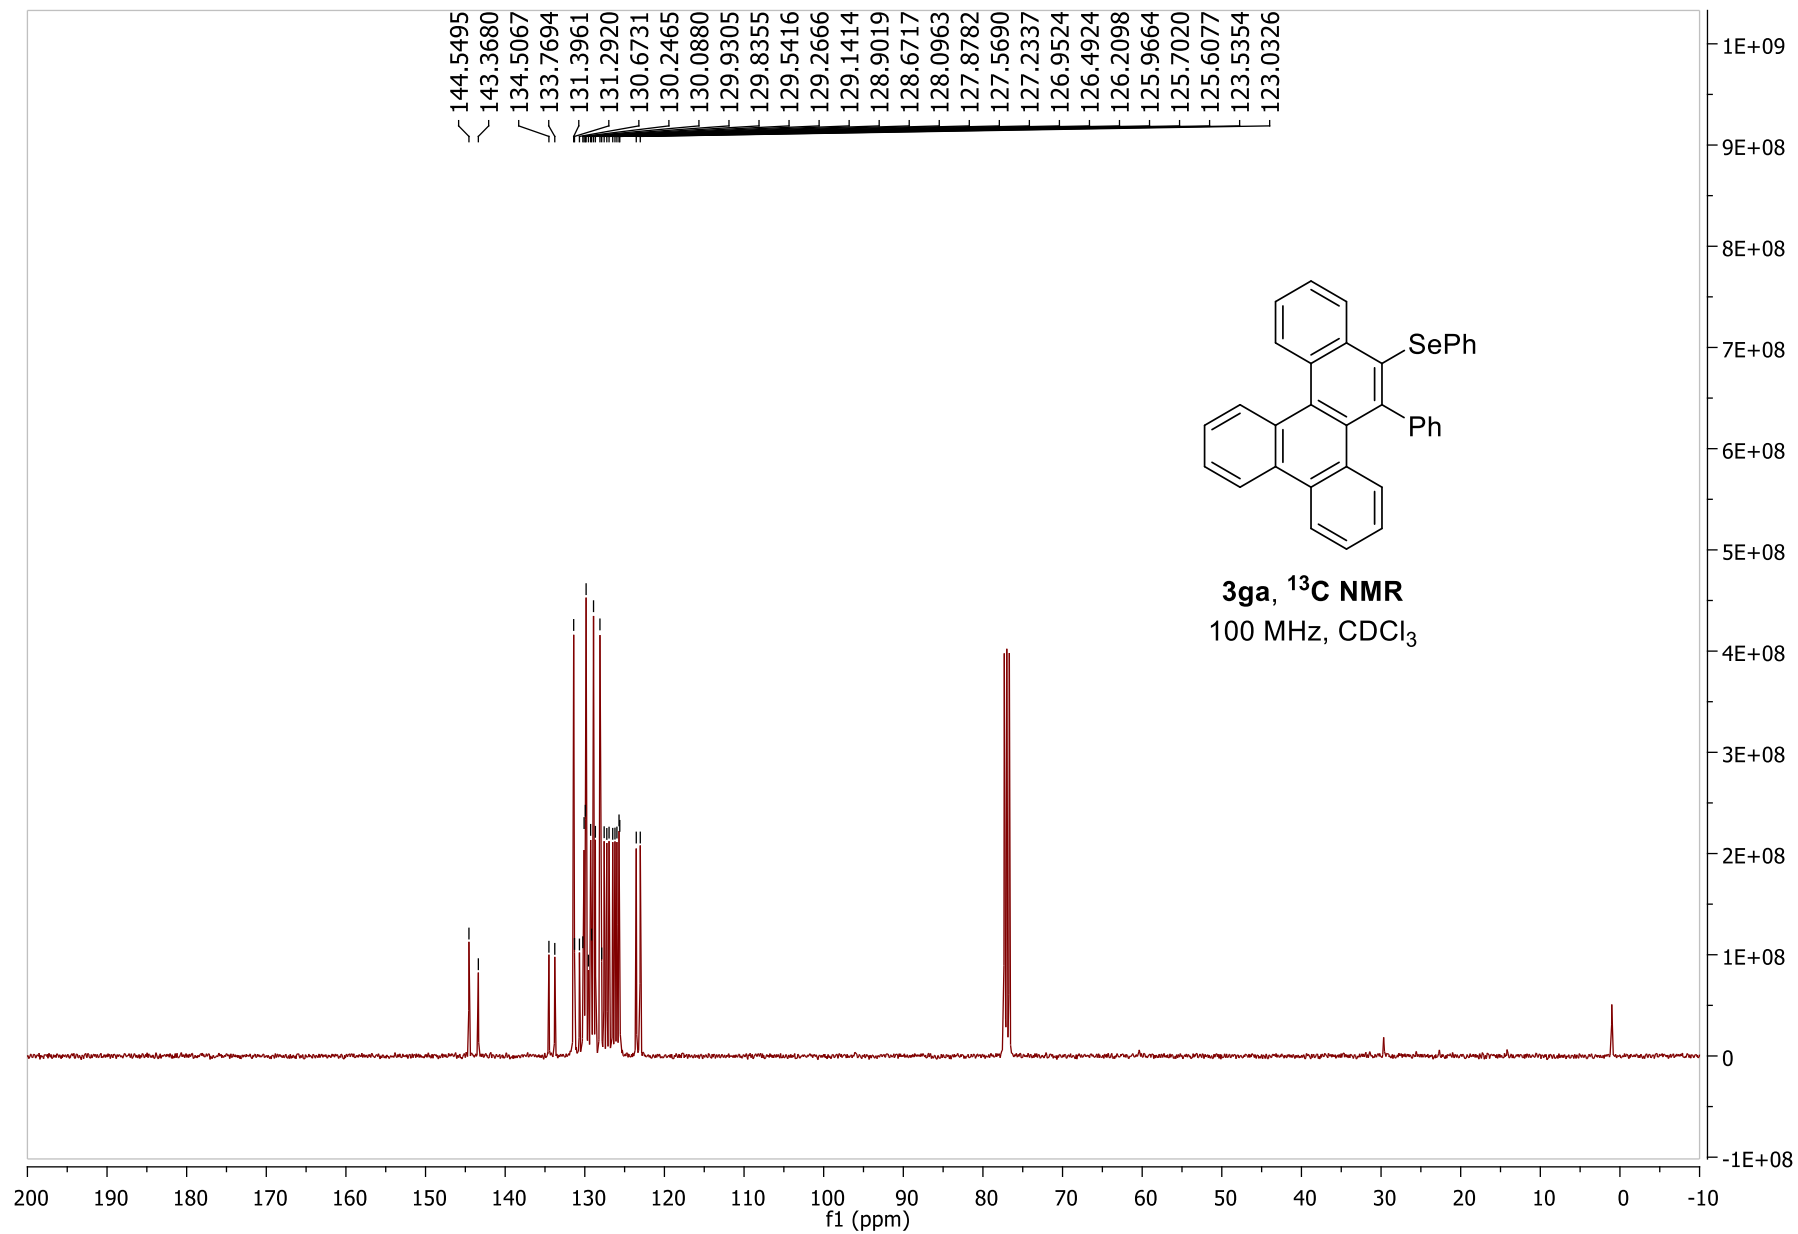

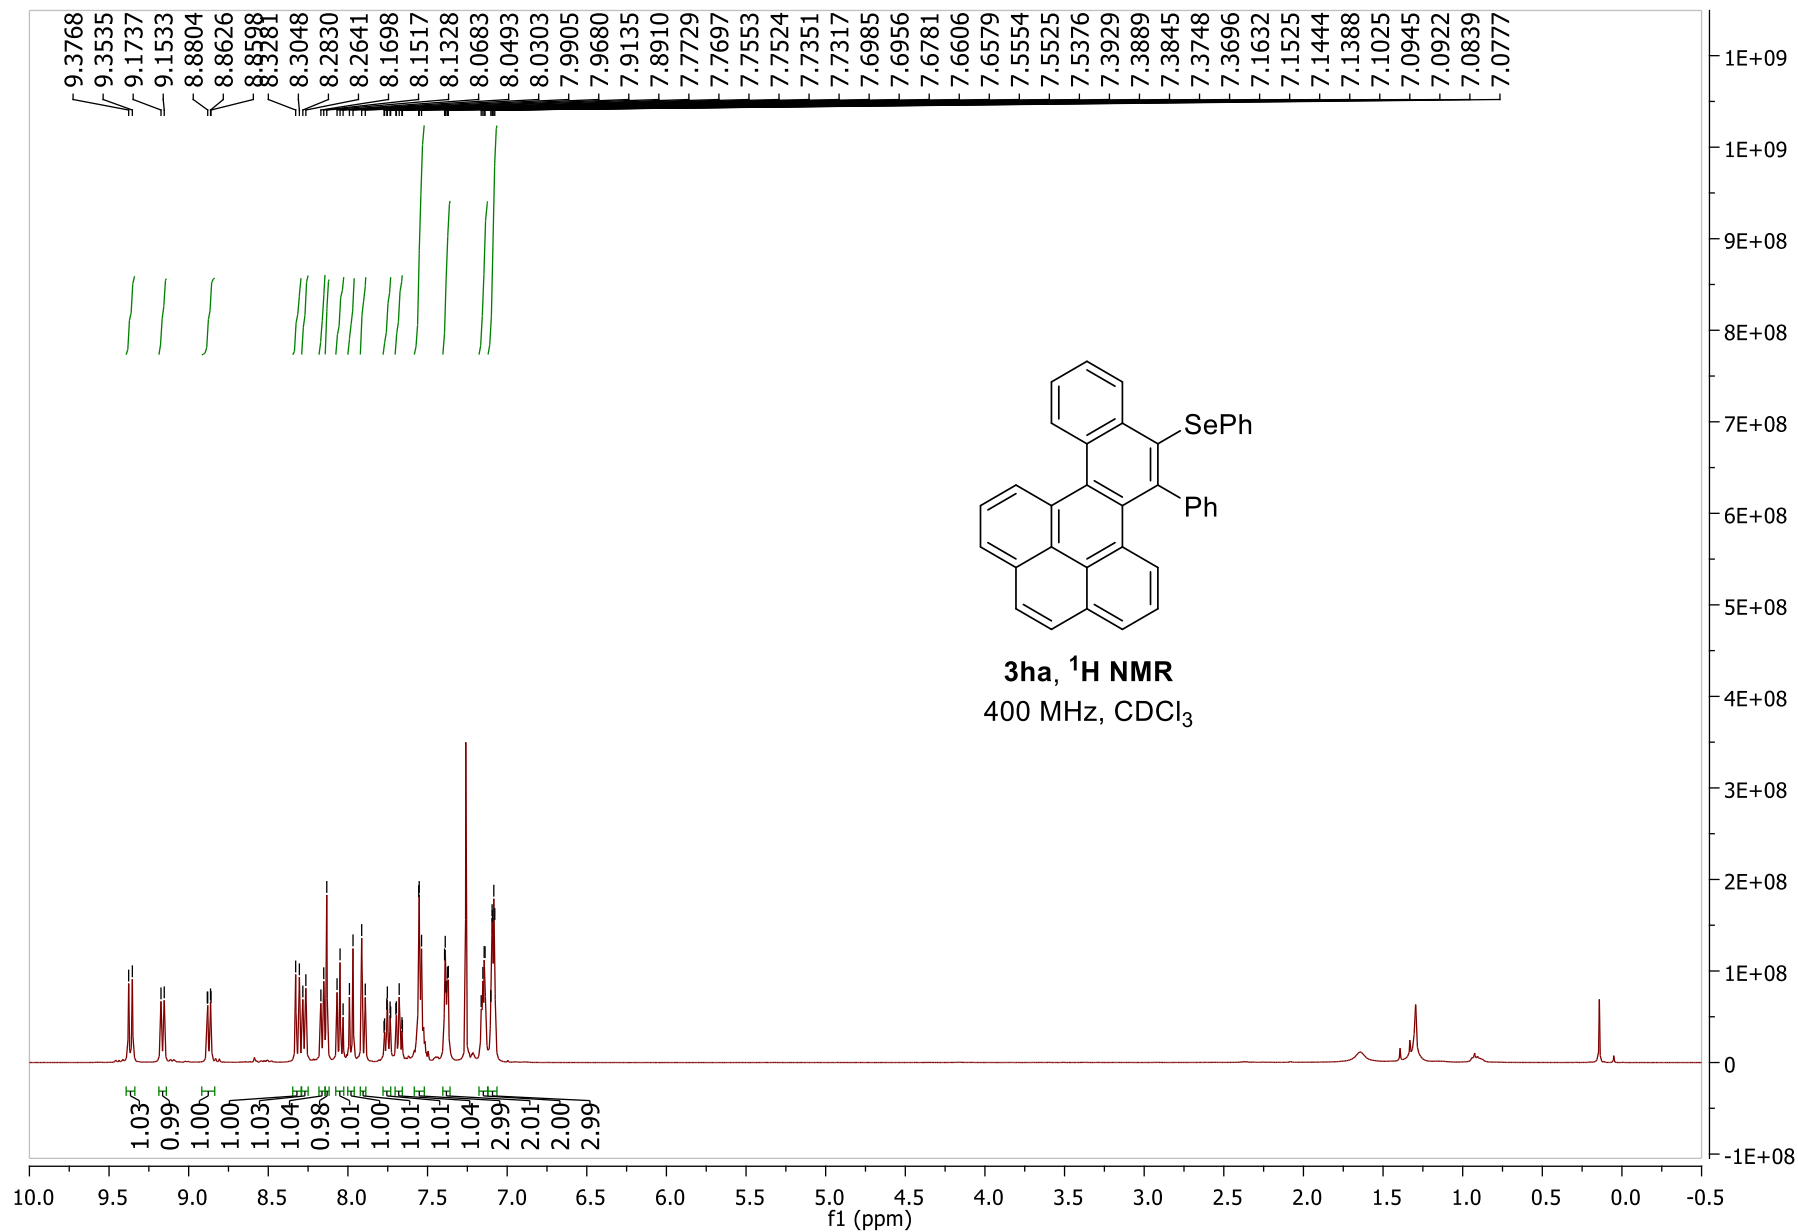

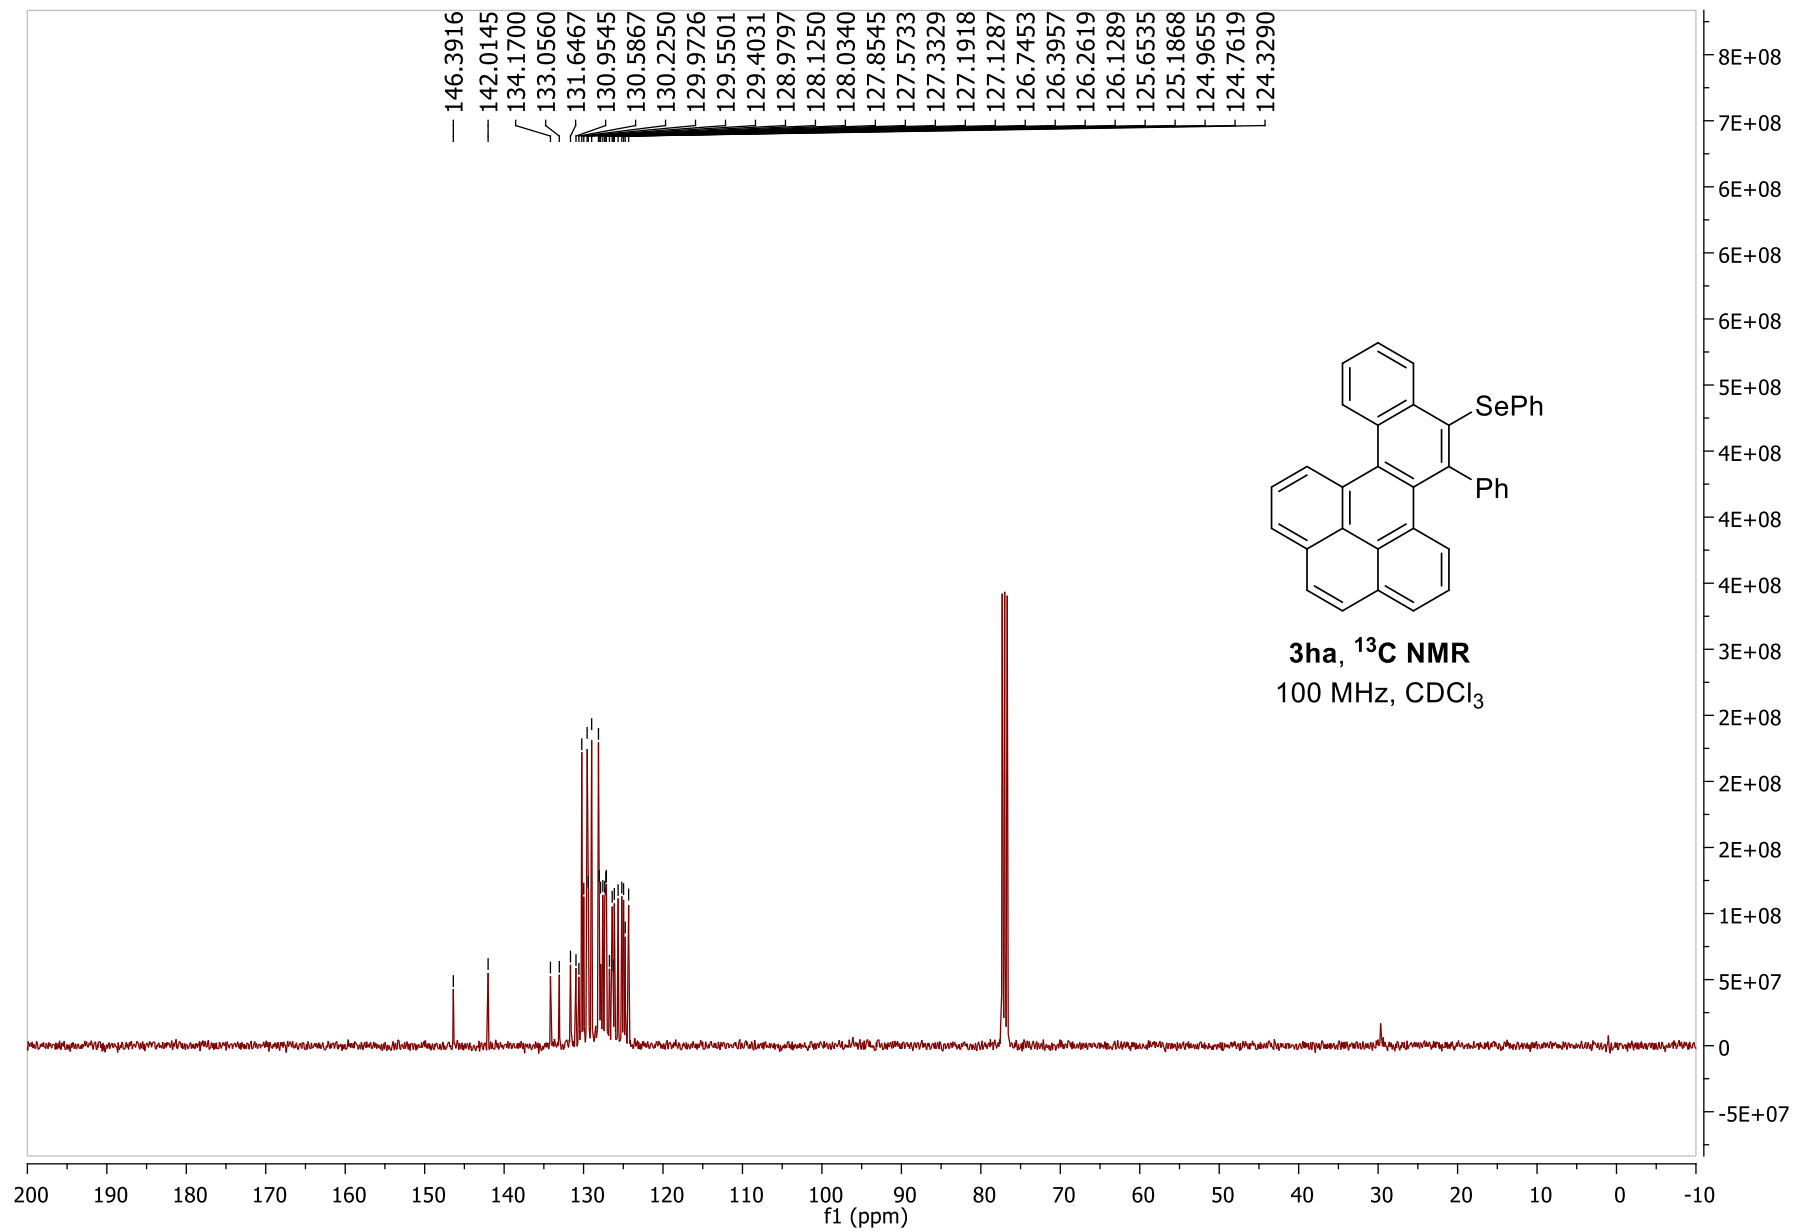

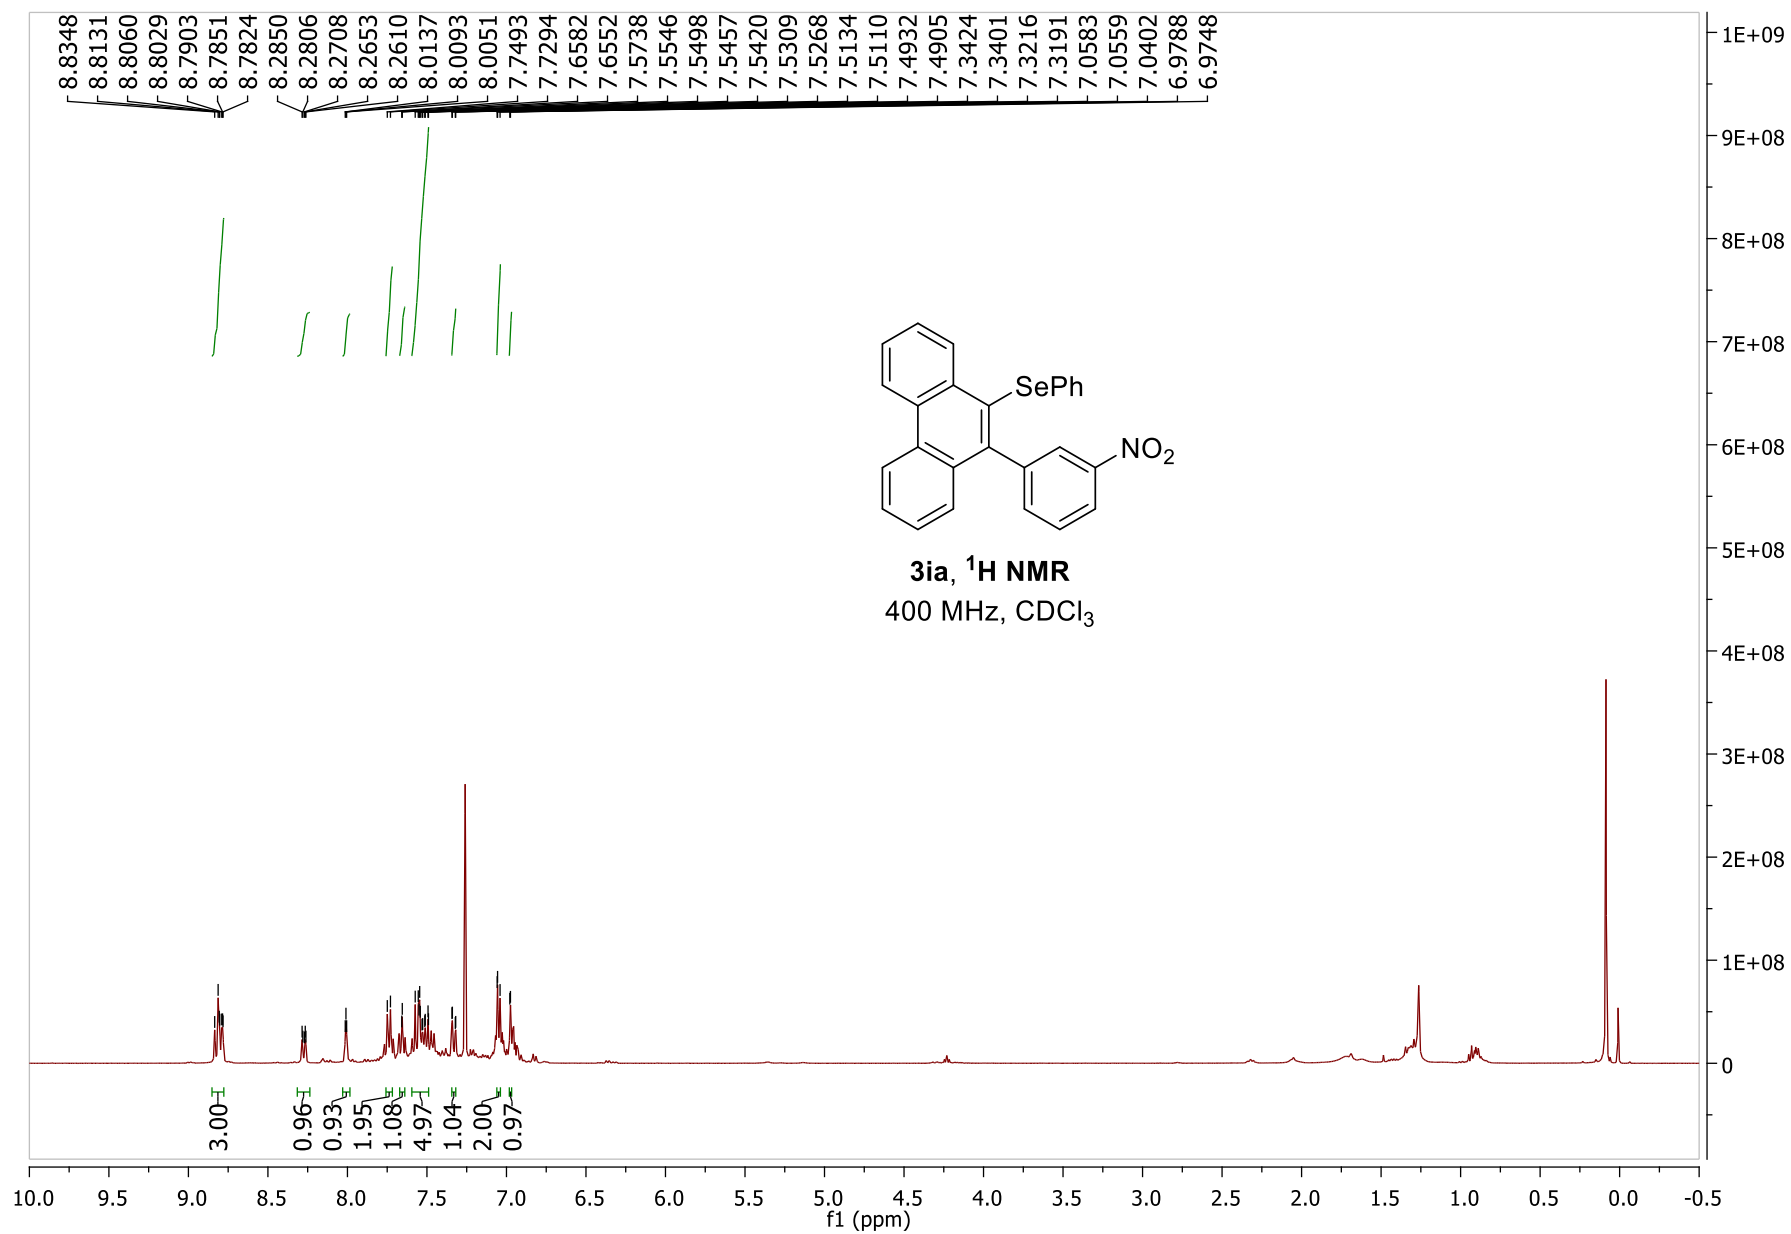

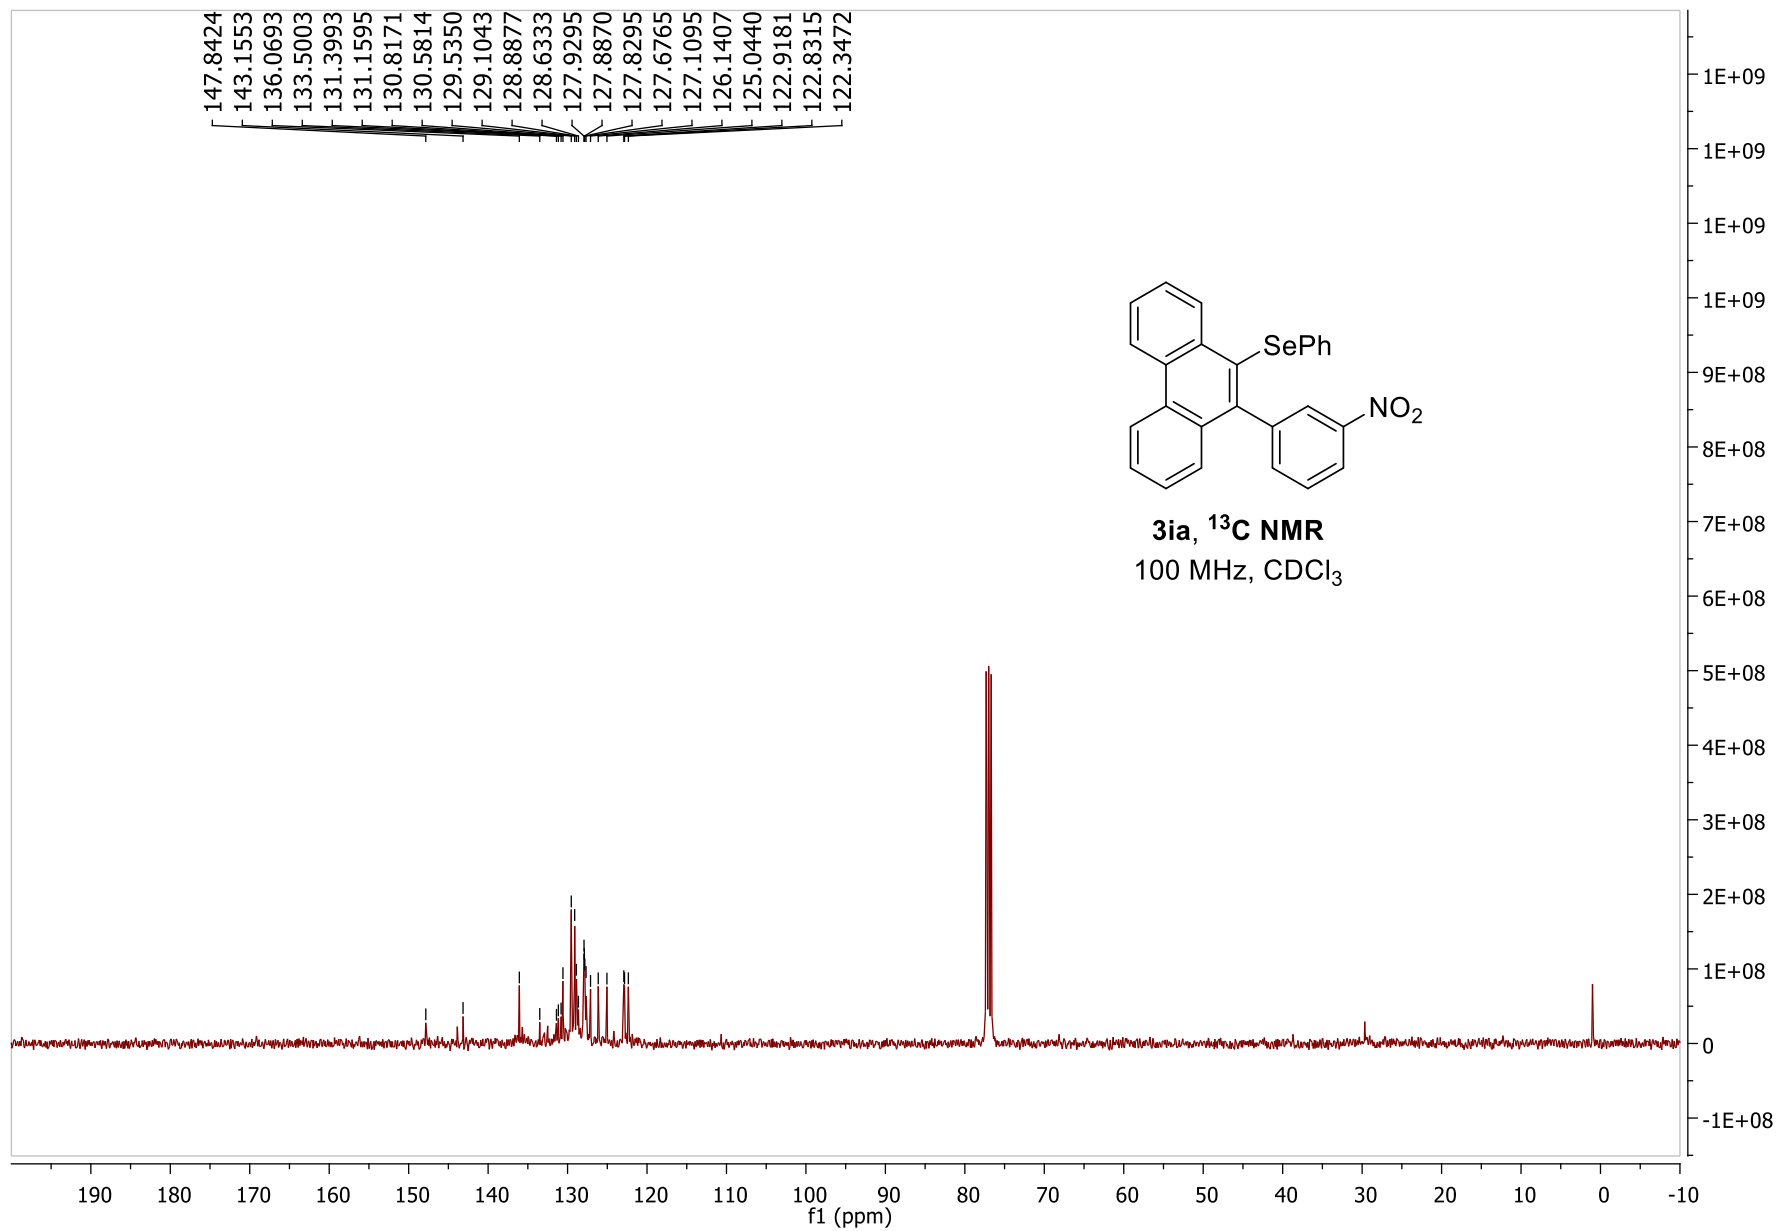

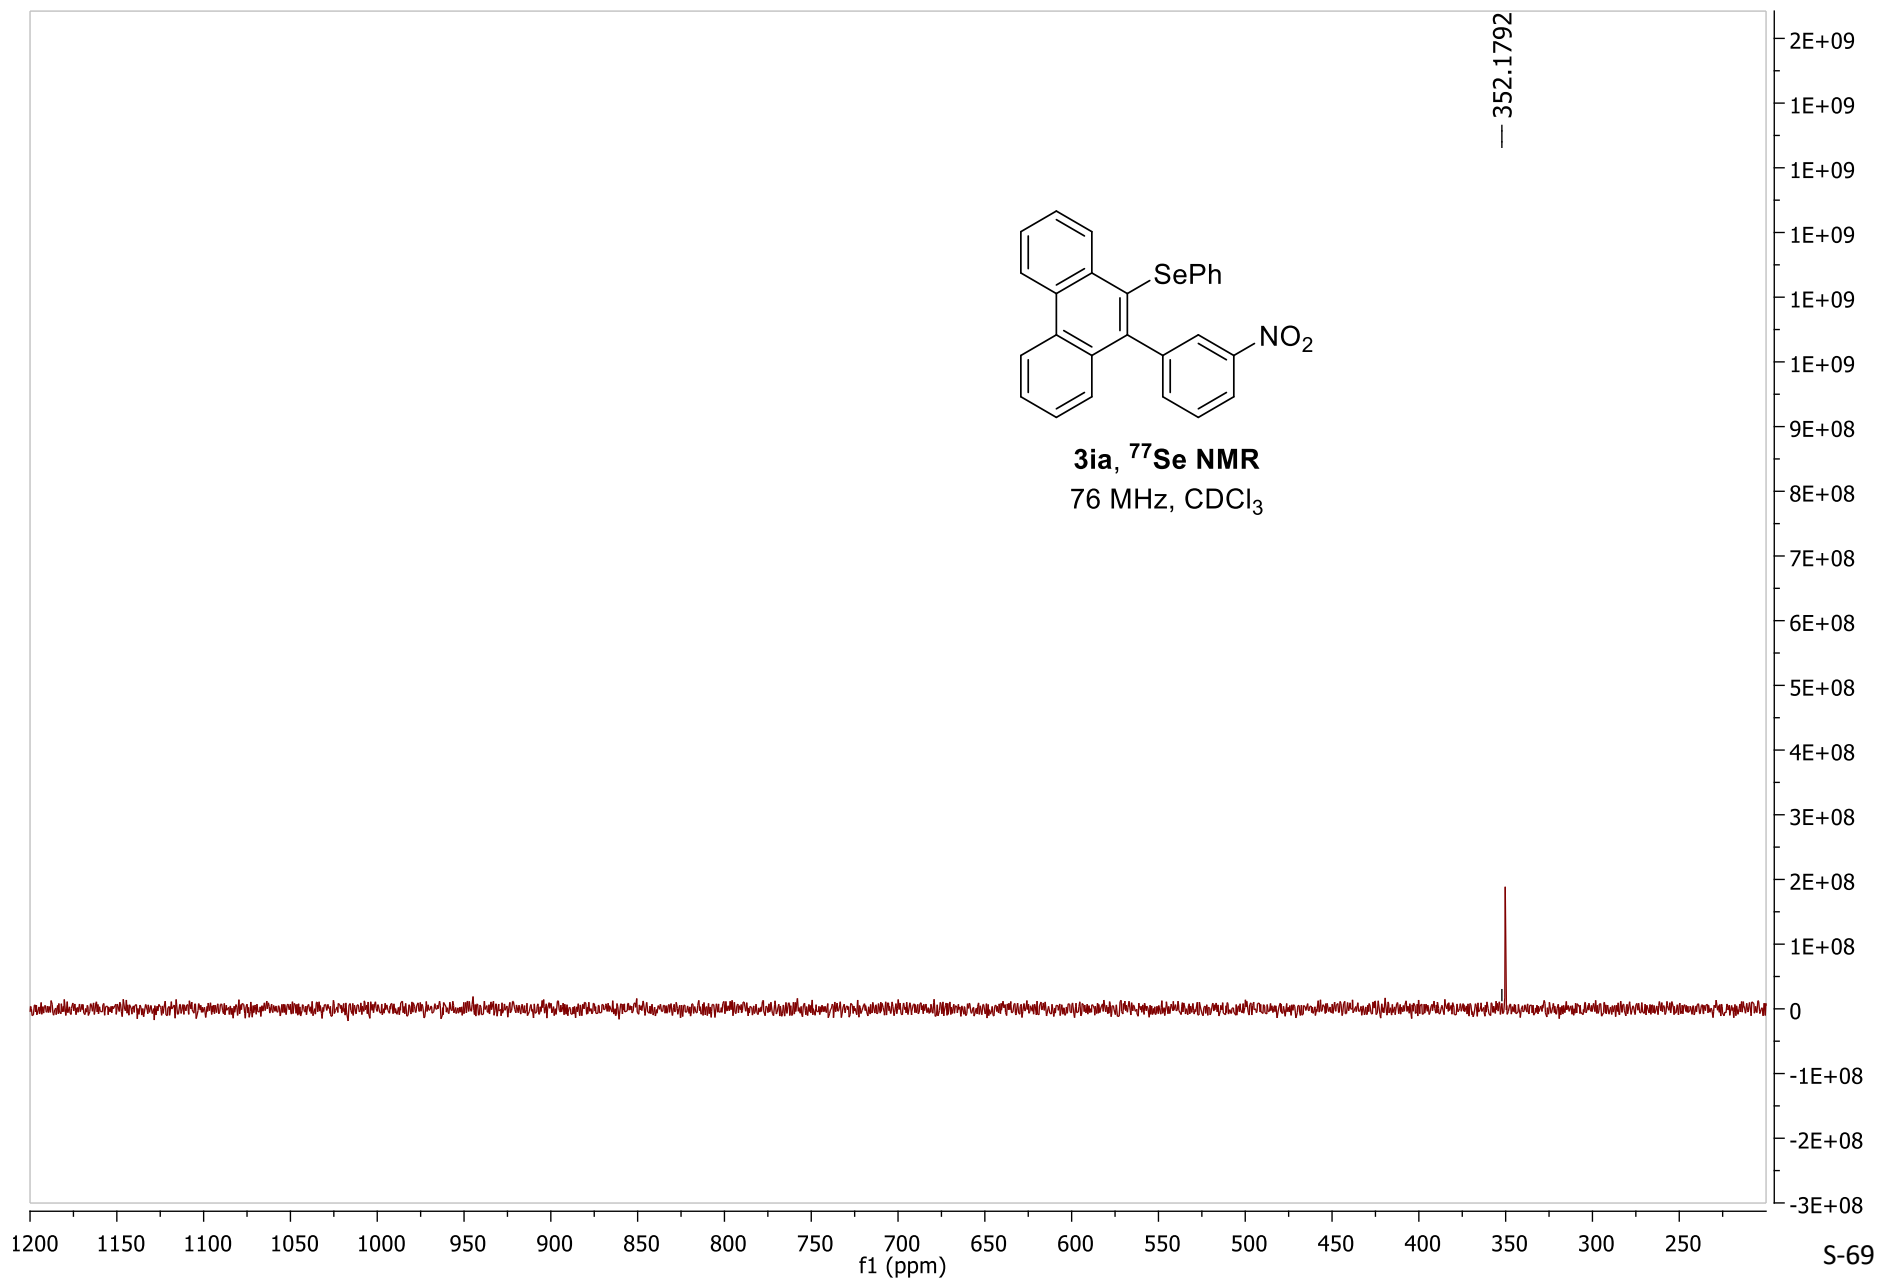

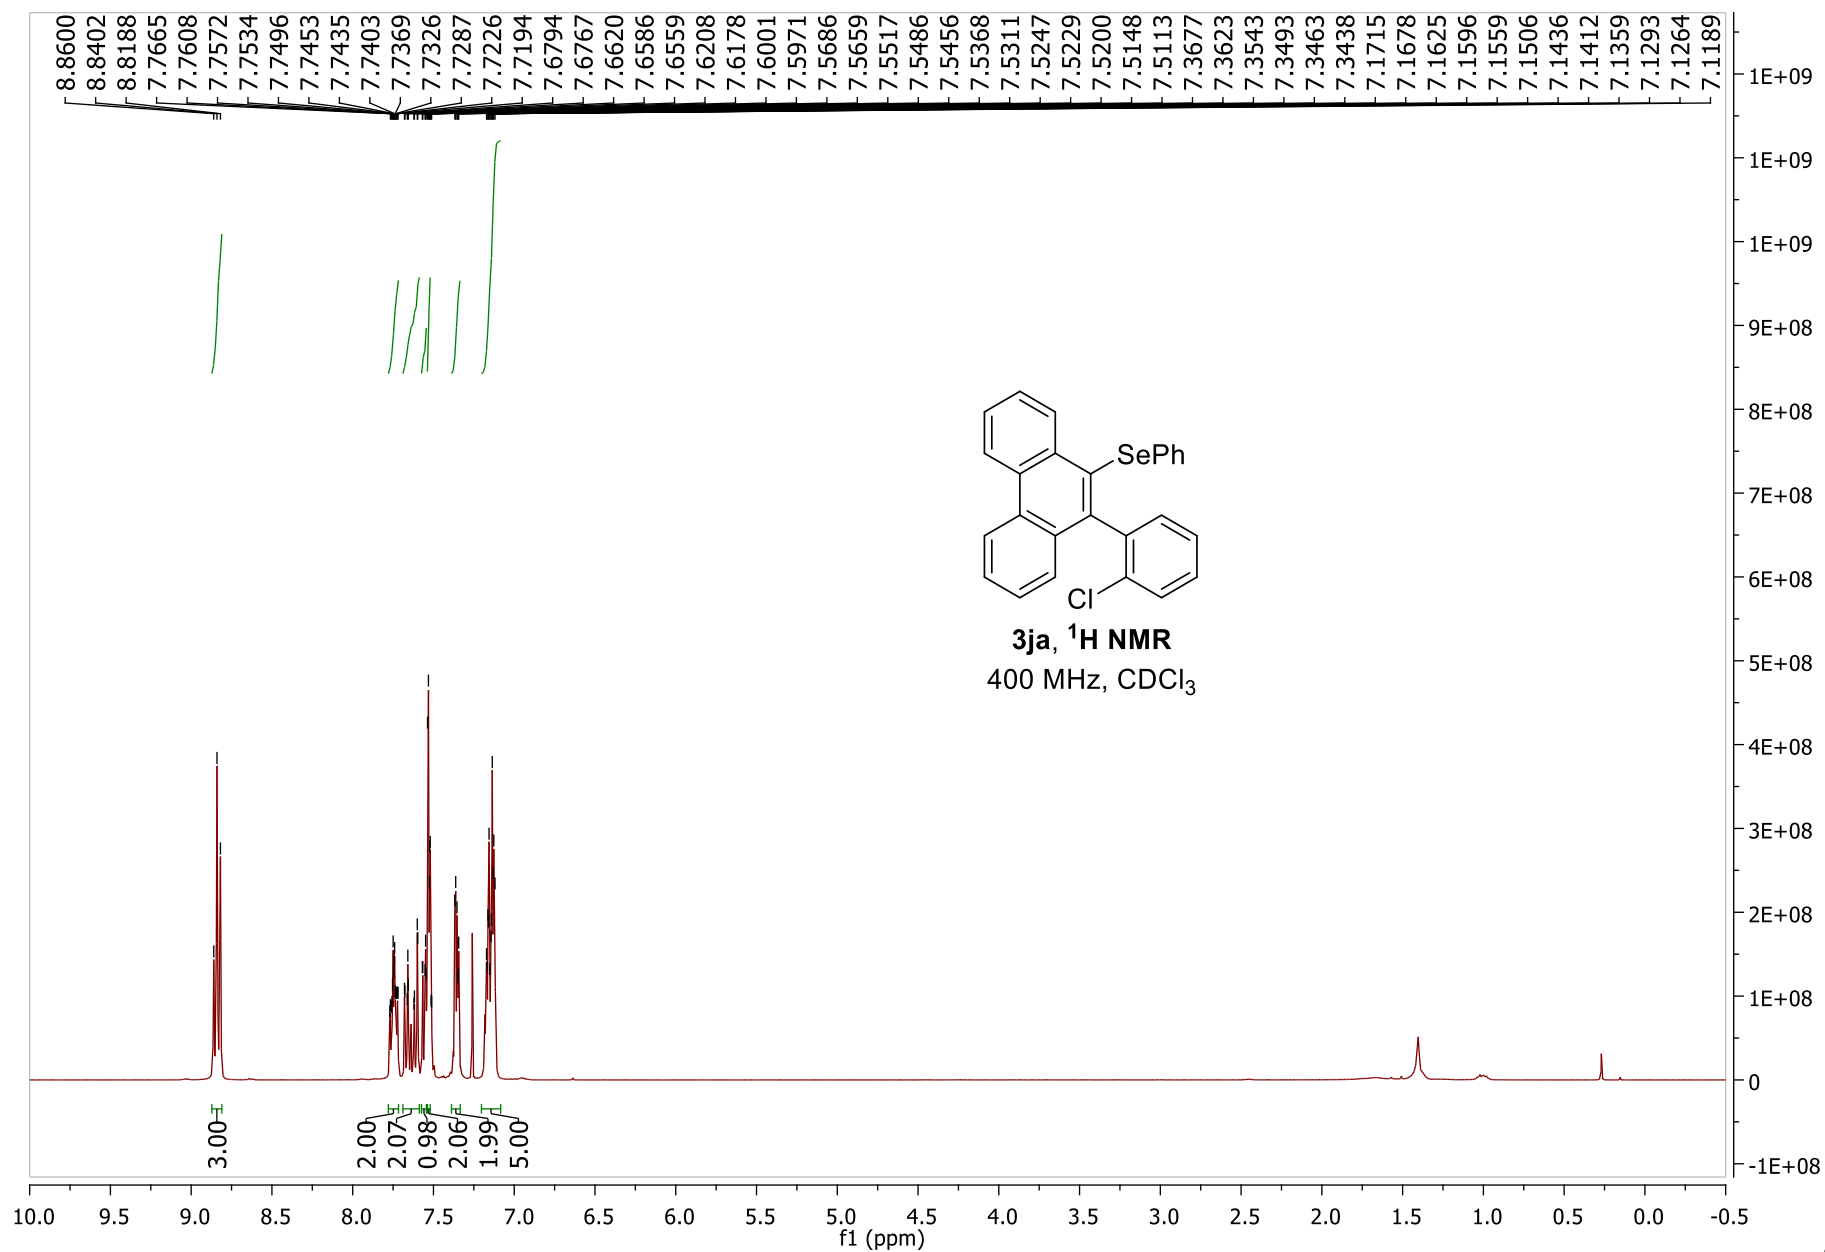

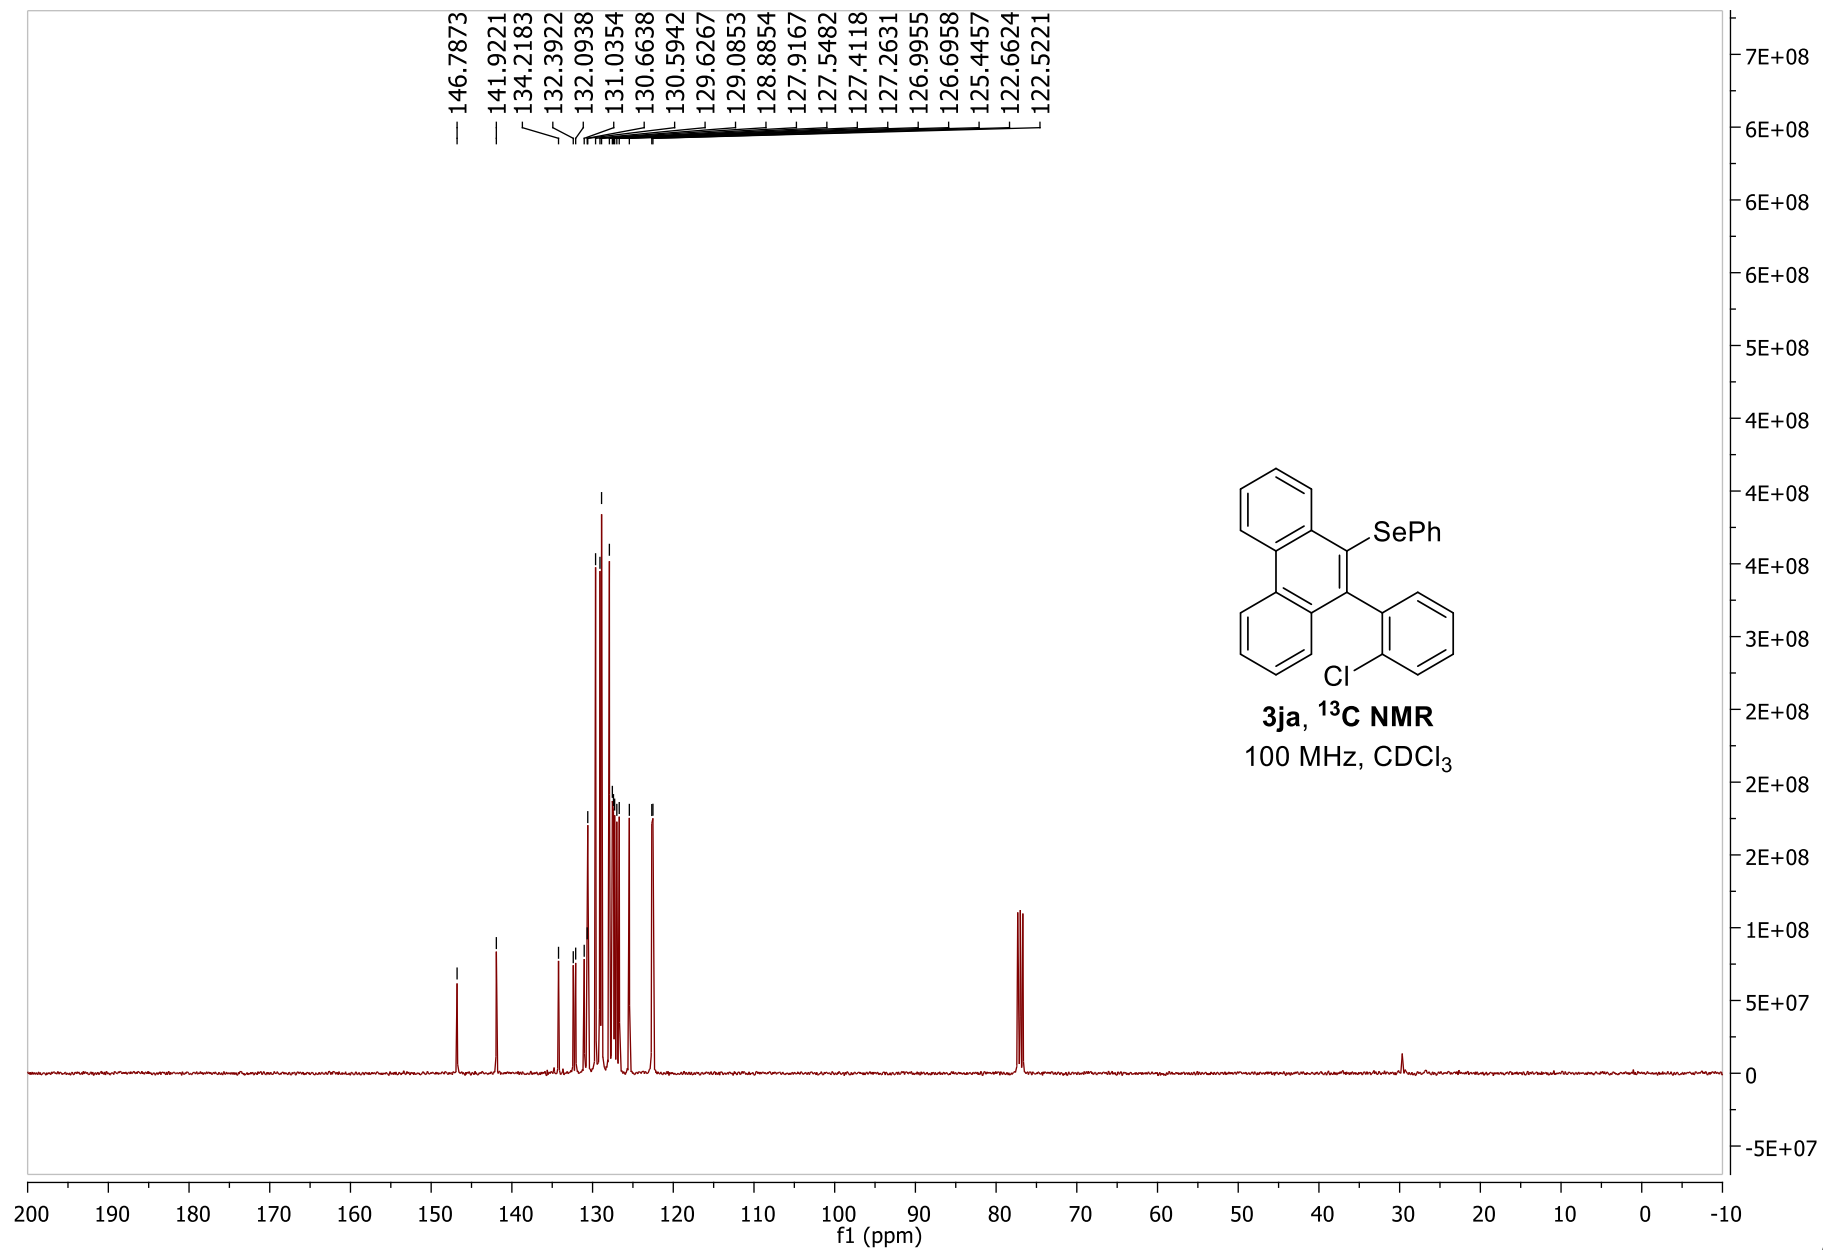

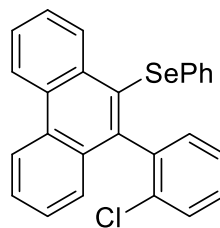

**3ja,  $^{77}\text{Se}$  NMR**  
76 MHz,  $\text{CDCl}_3$

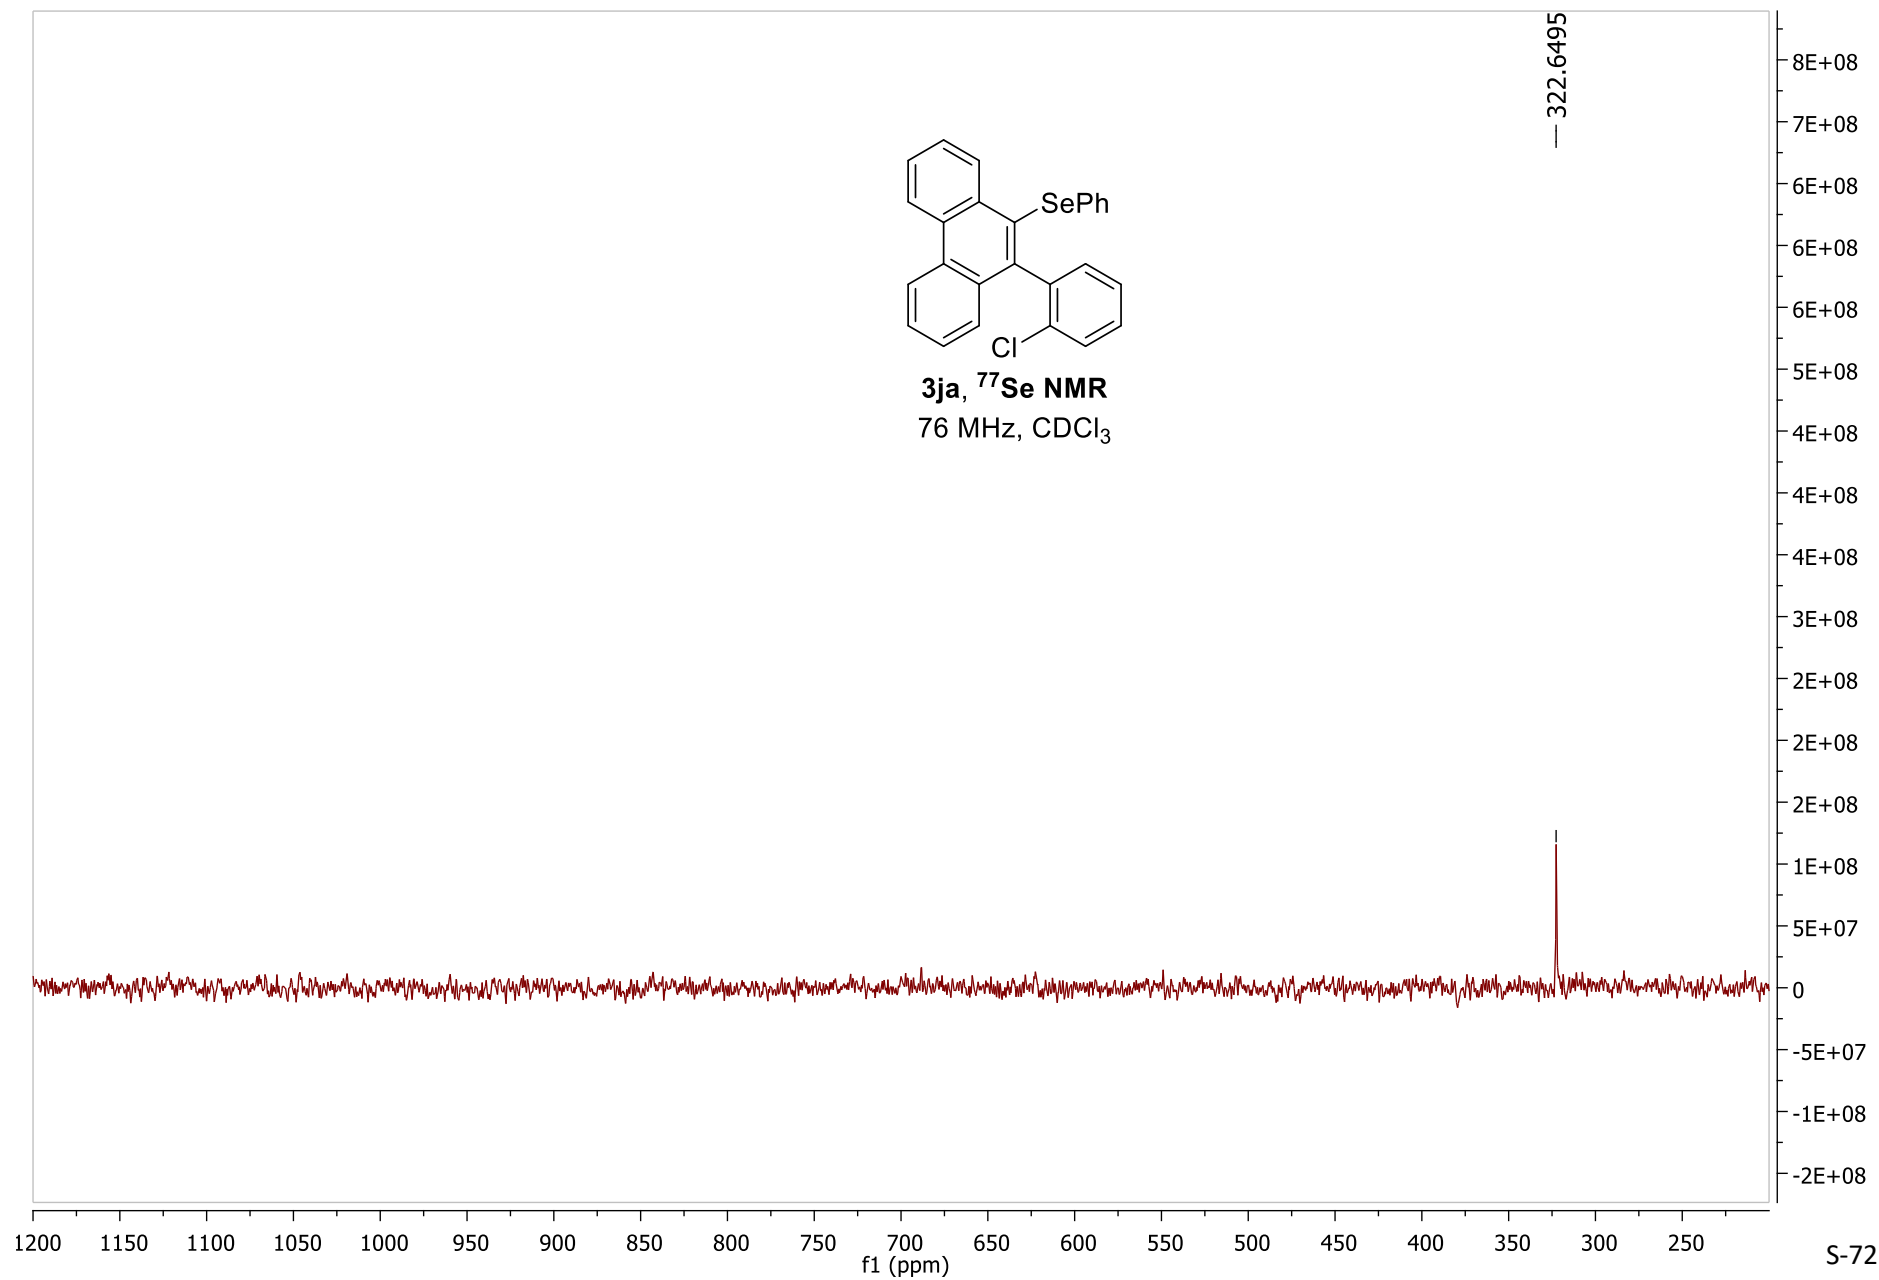

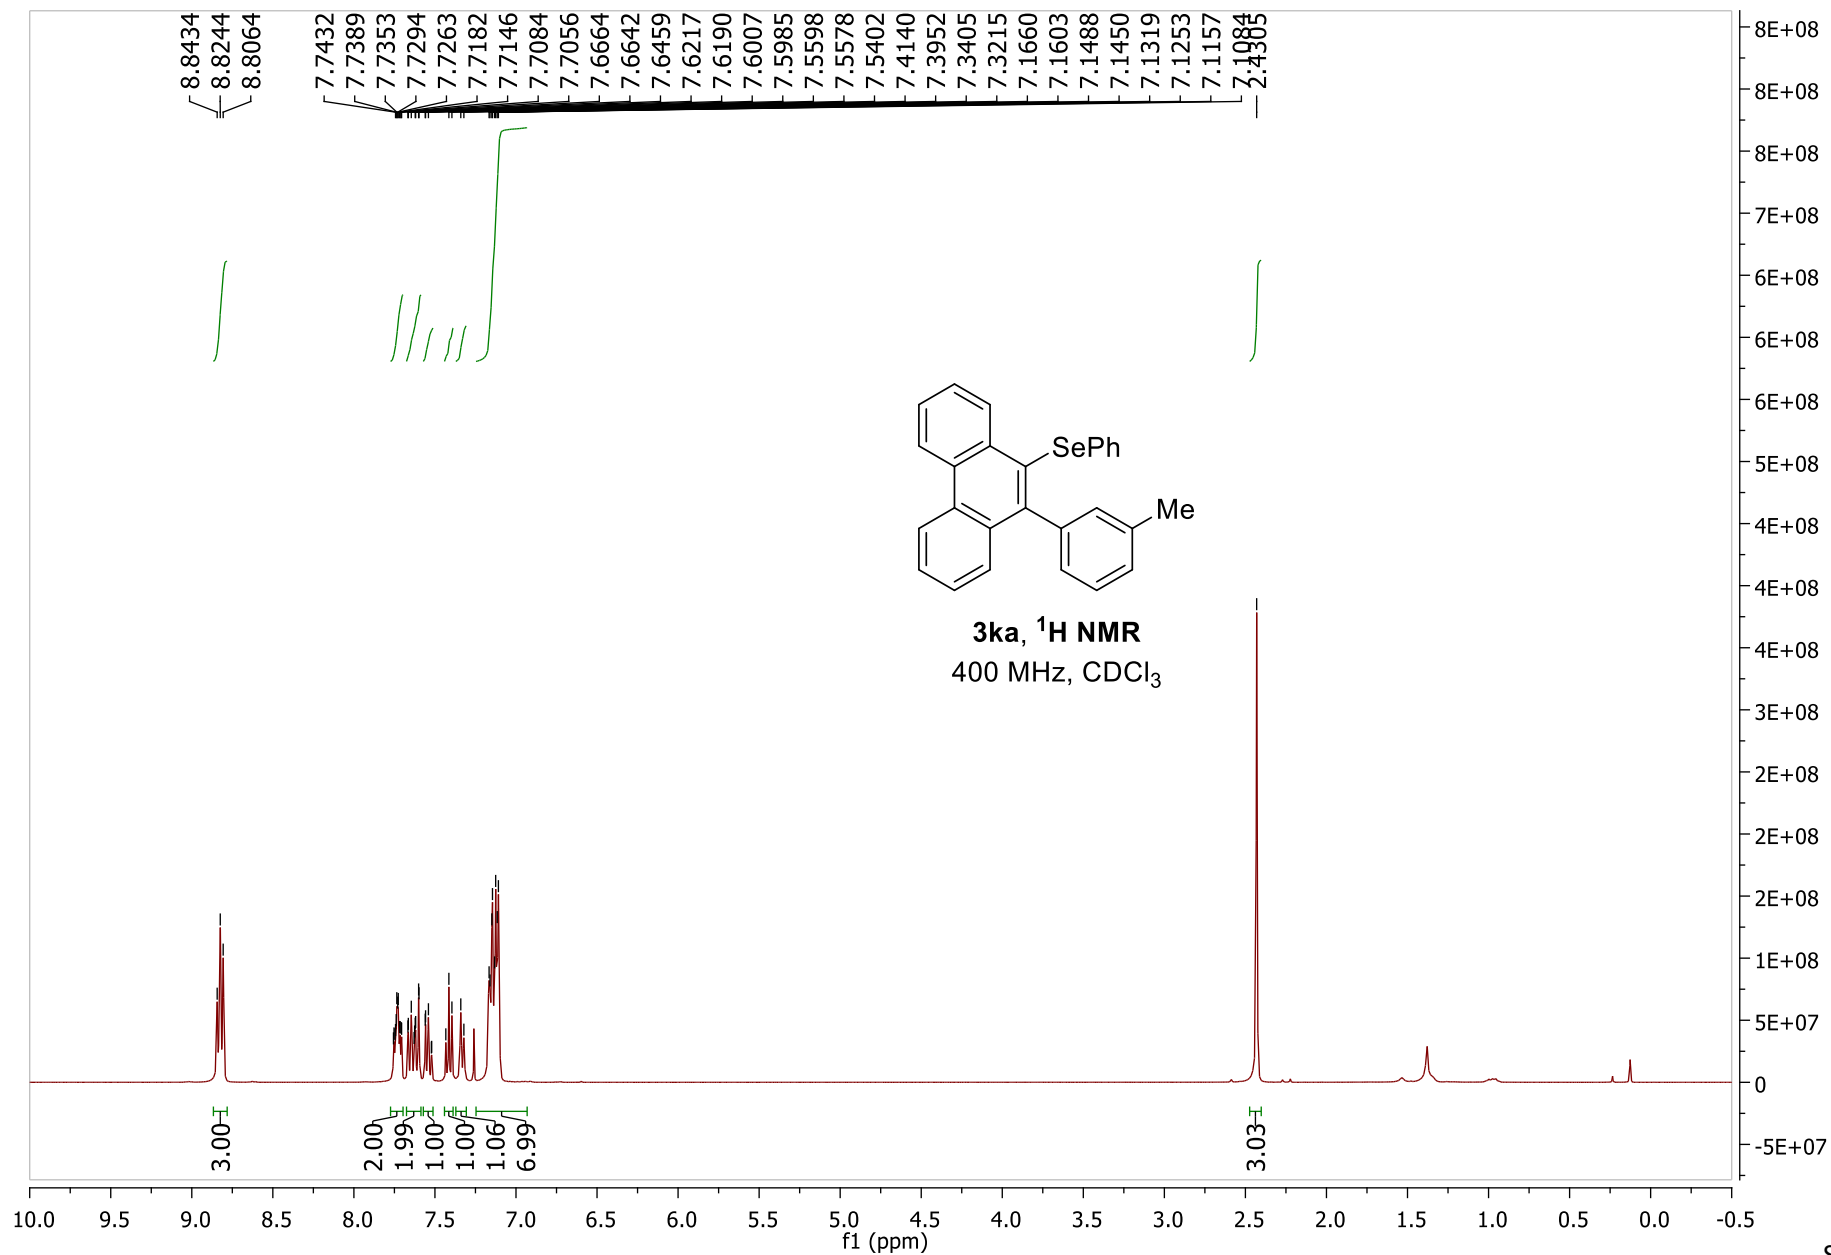

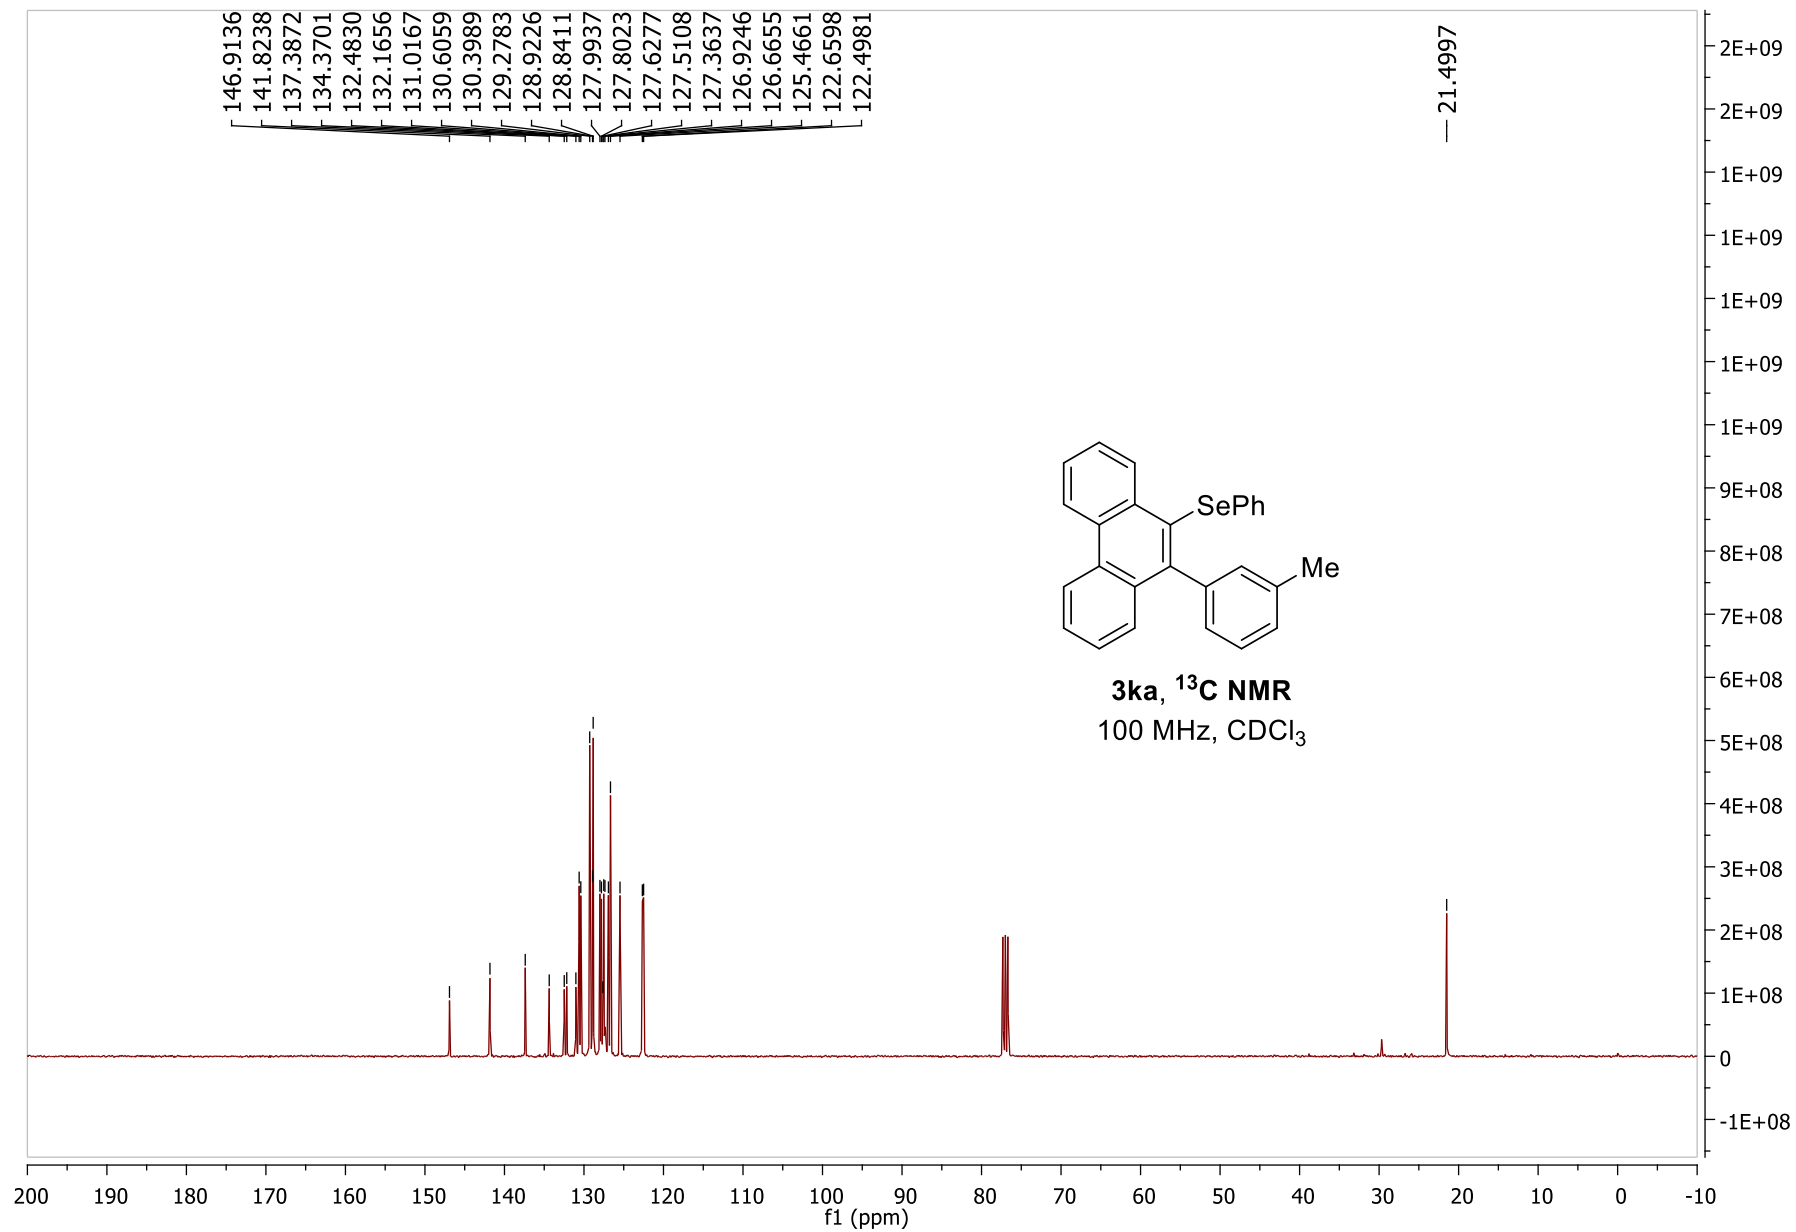

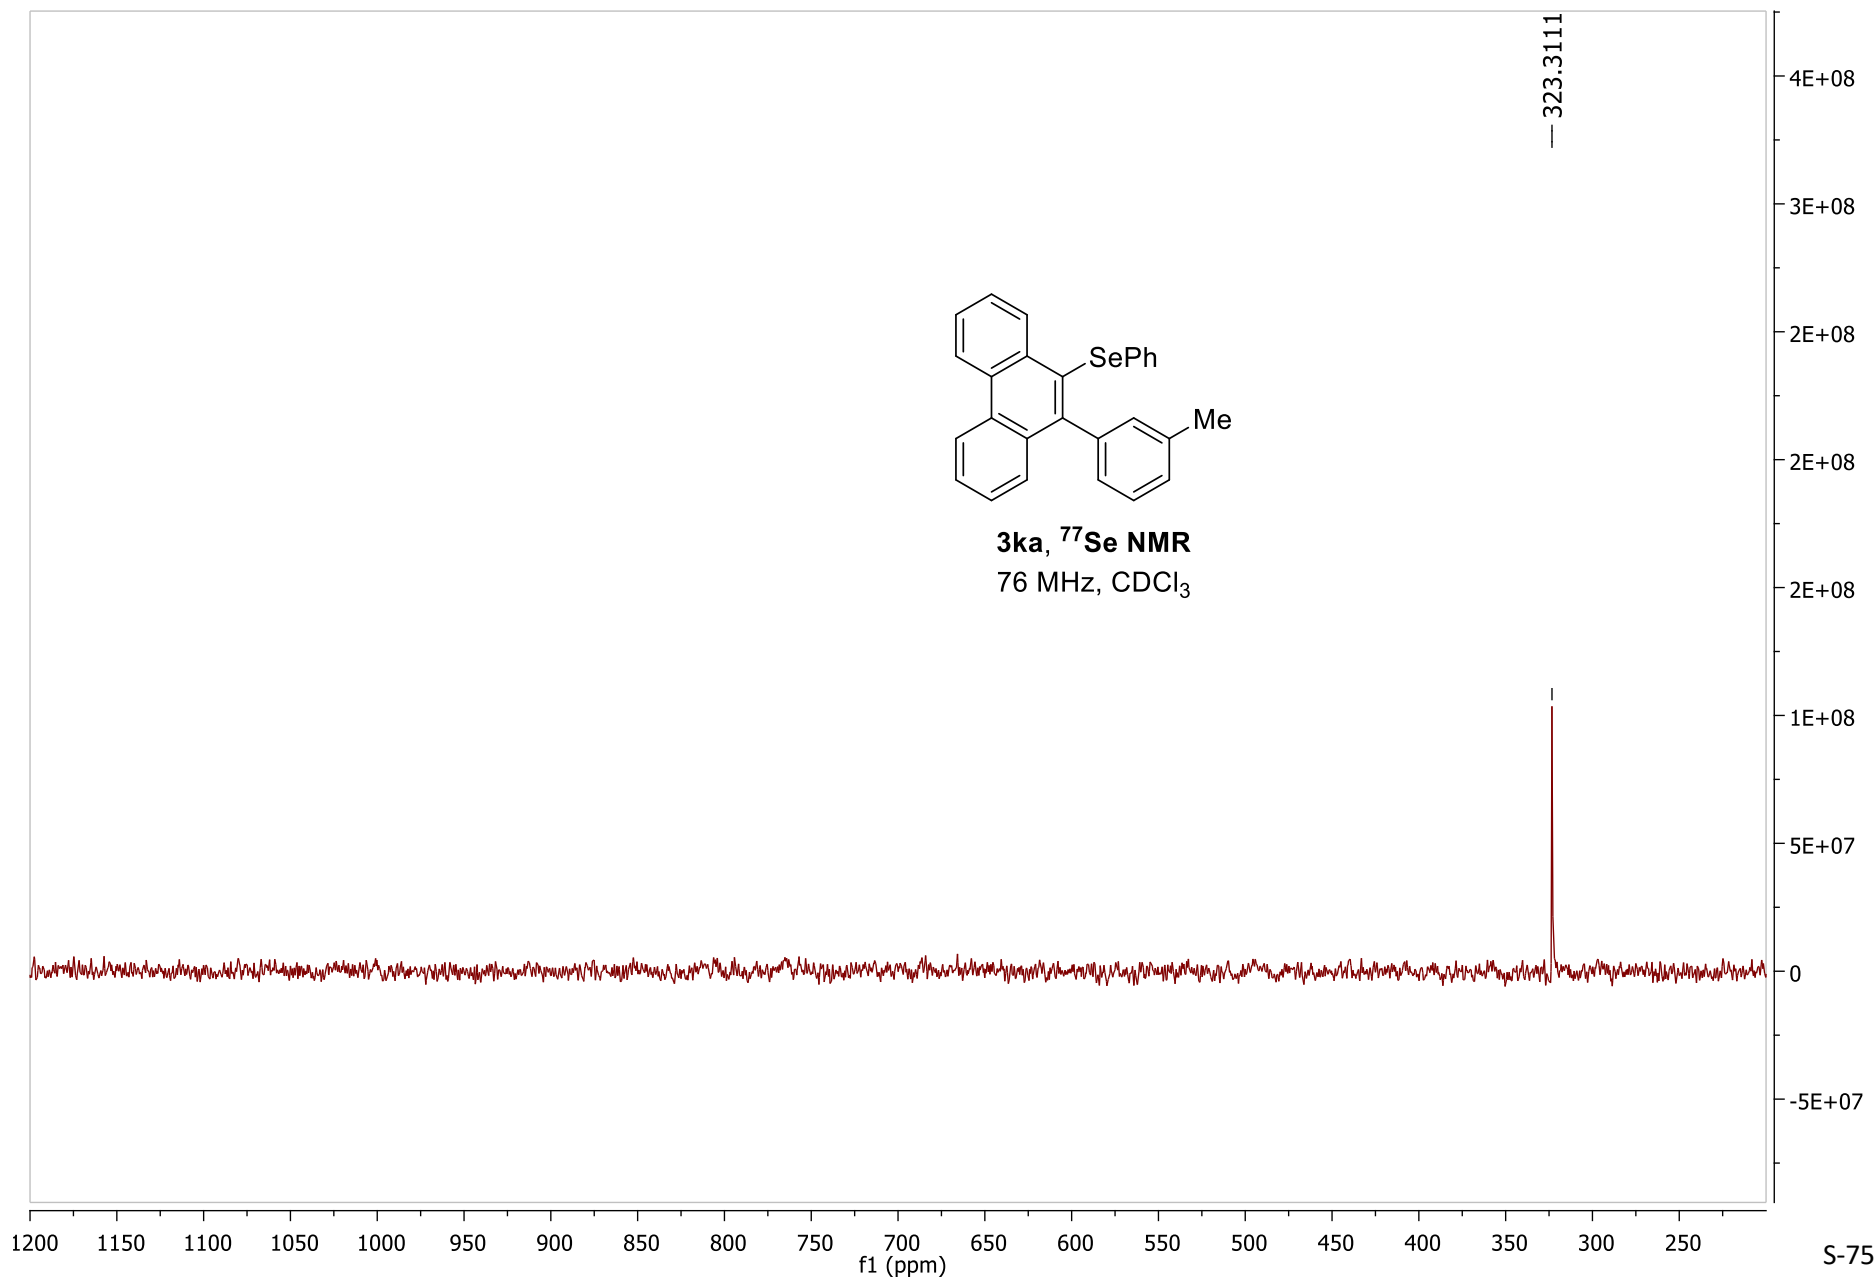

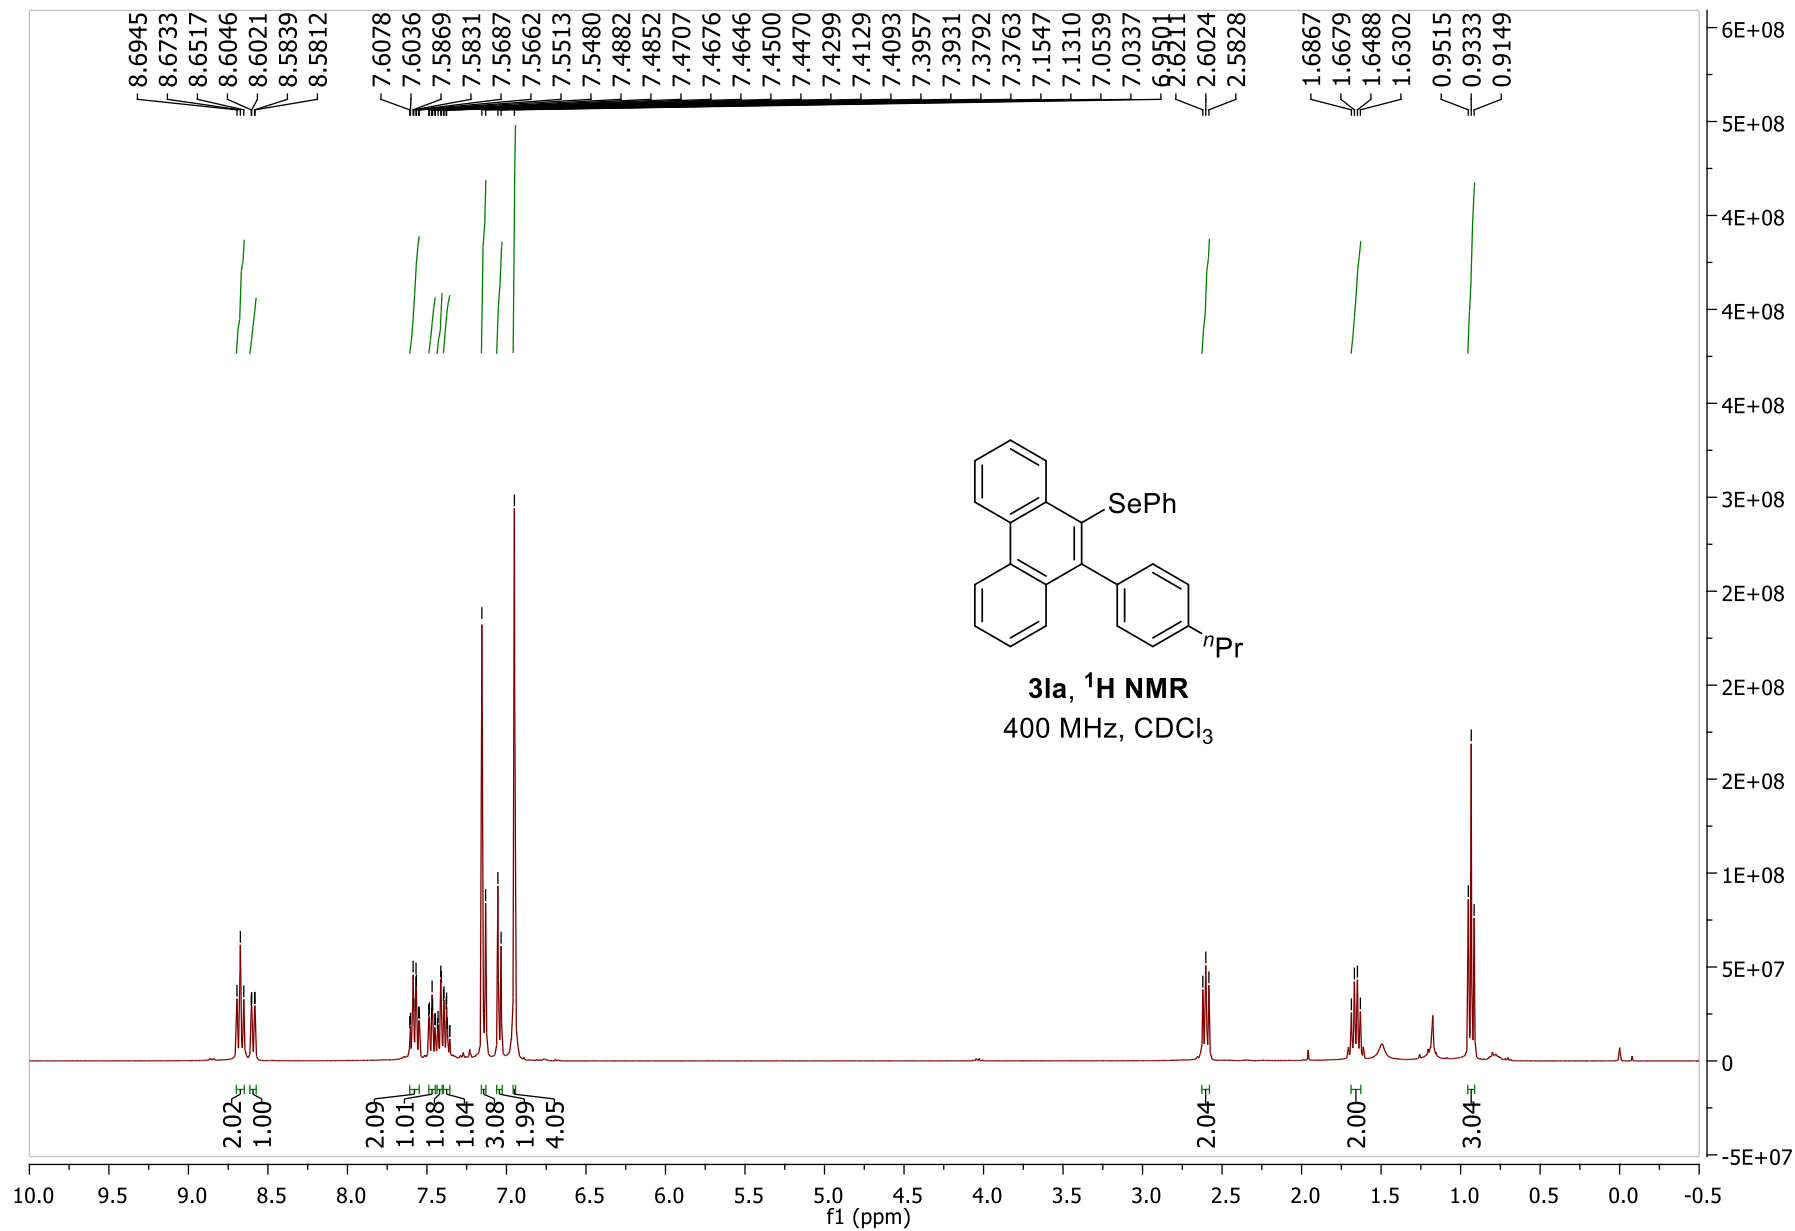

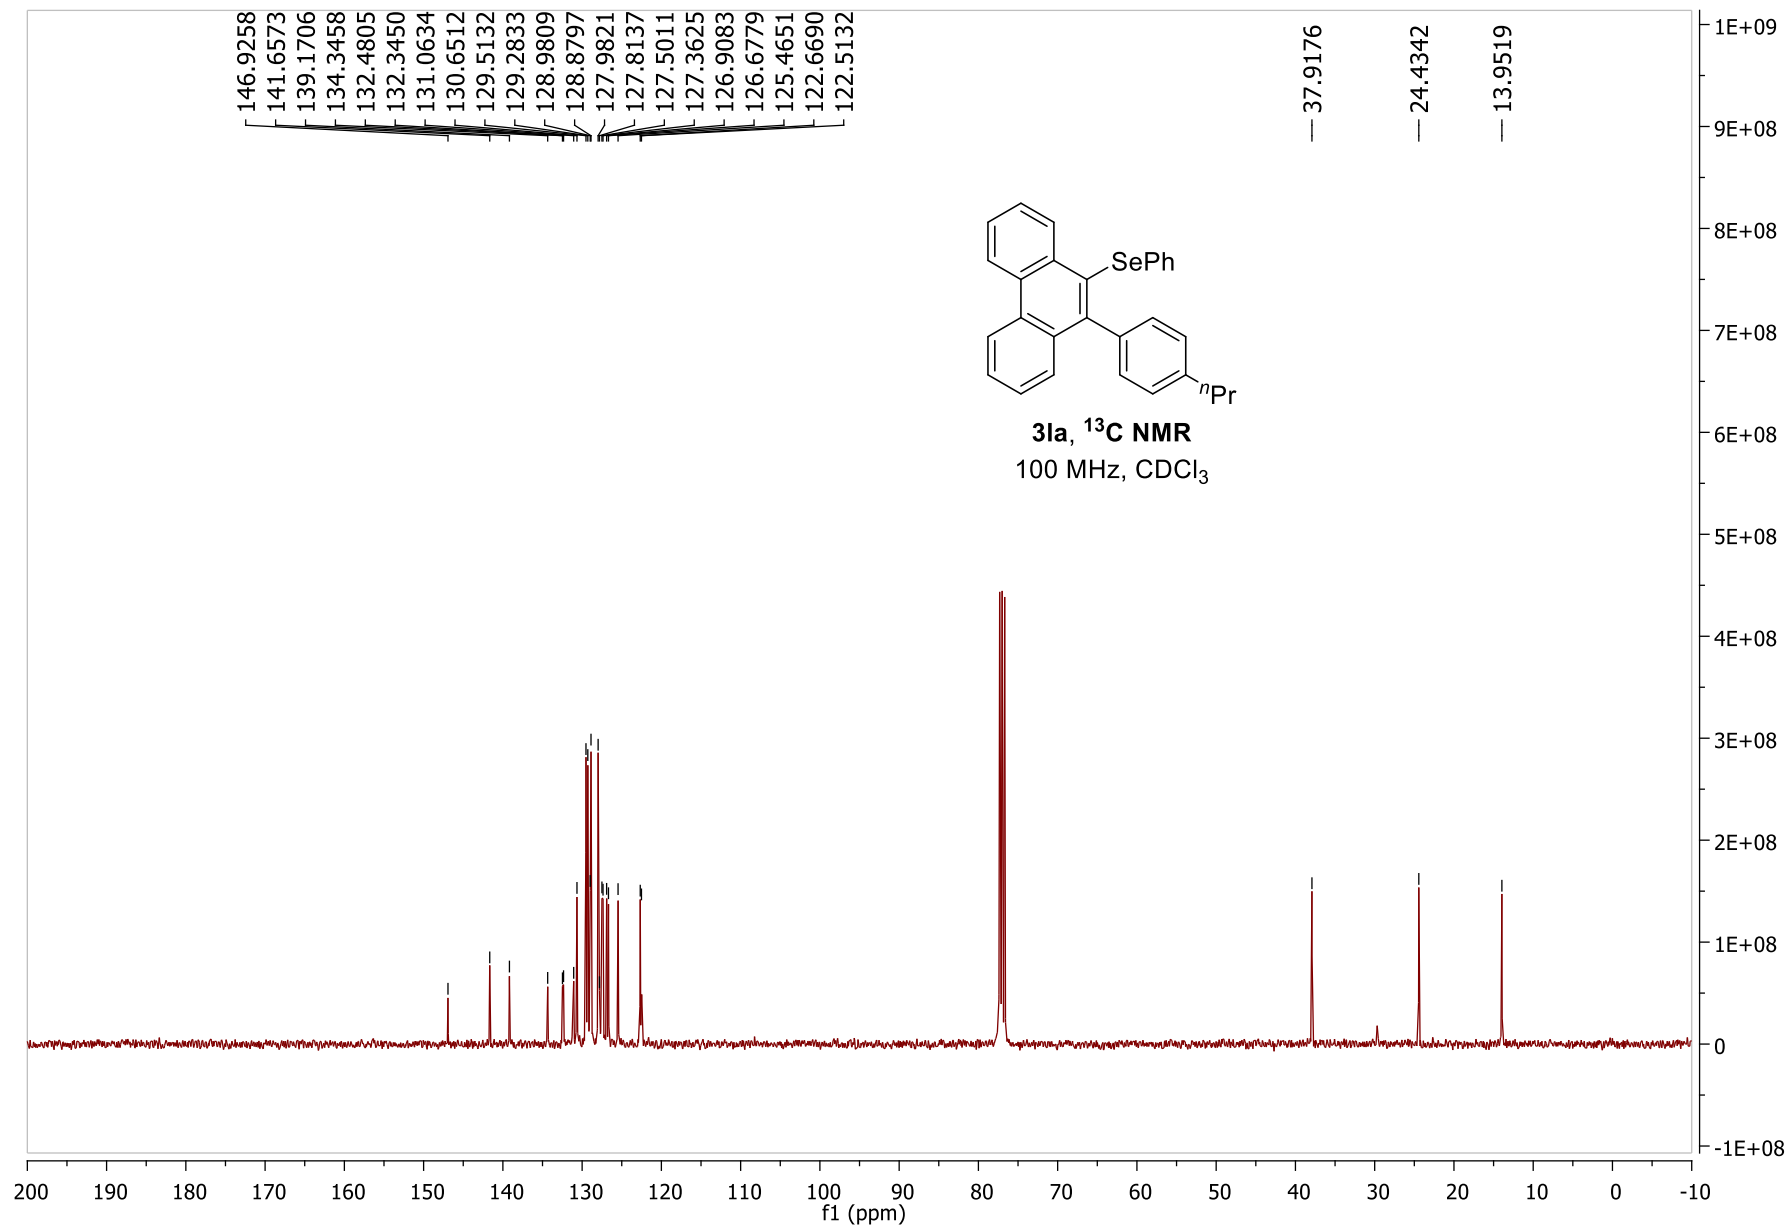

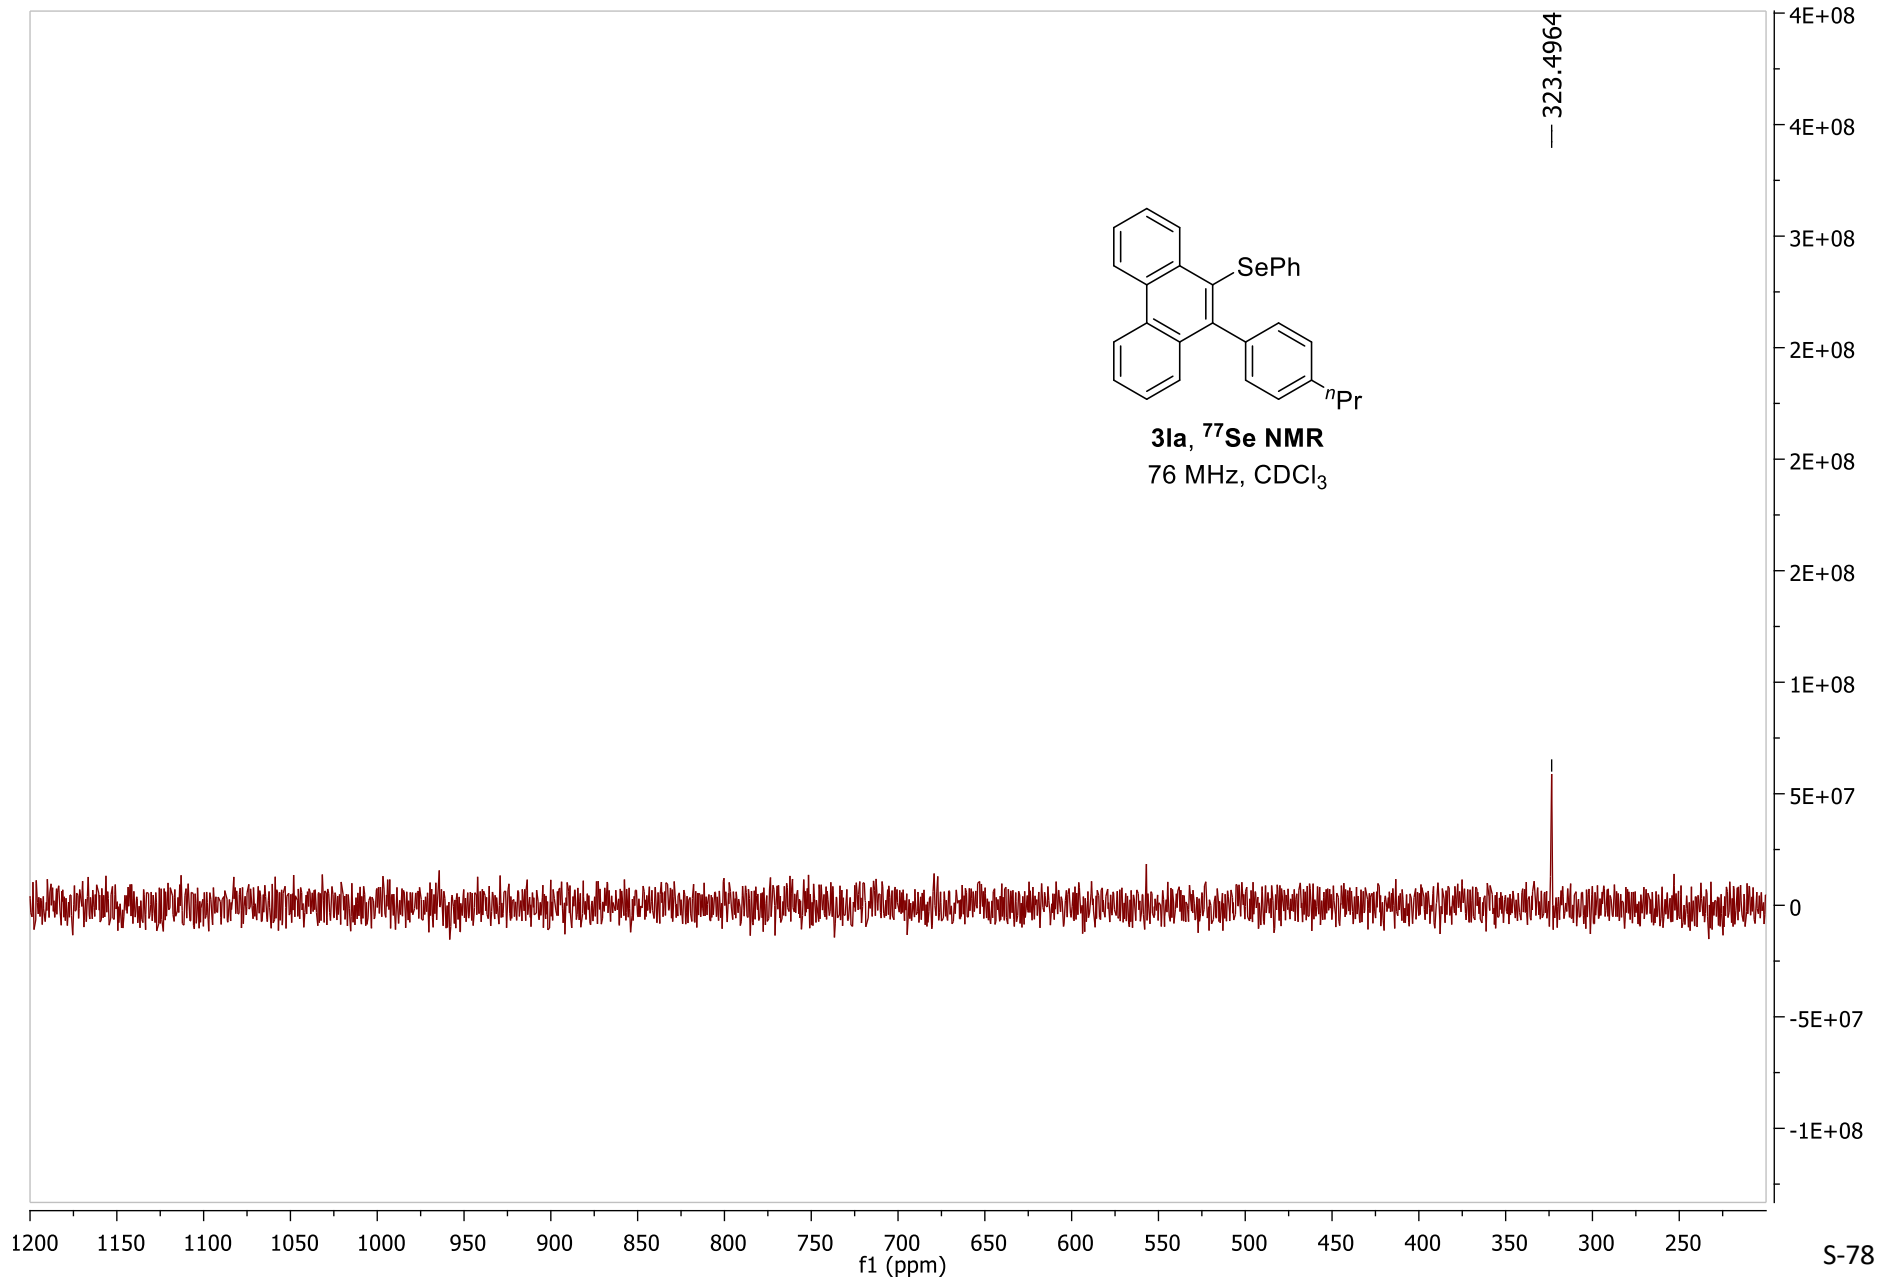

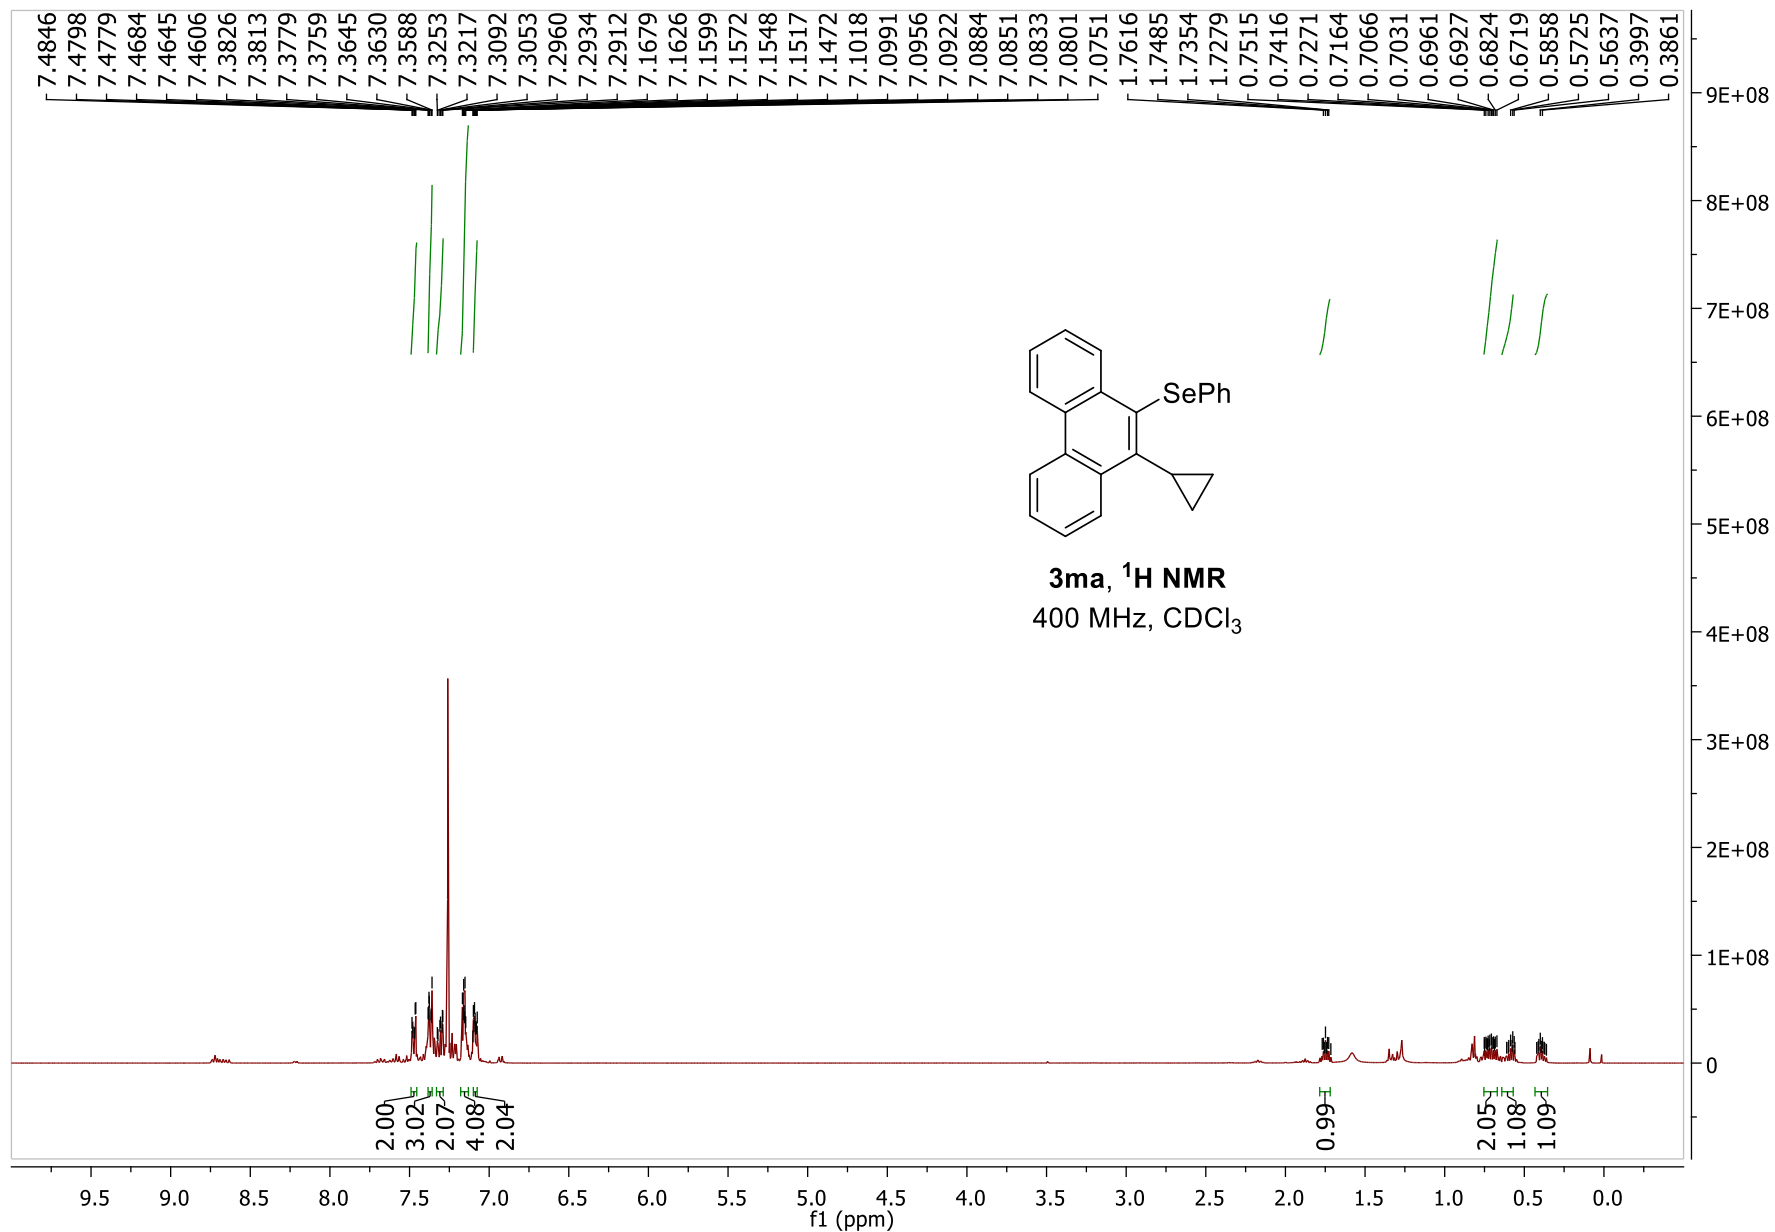

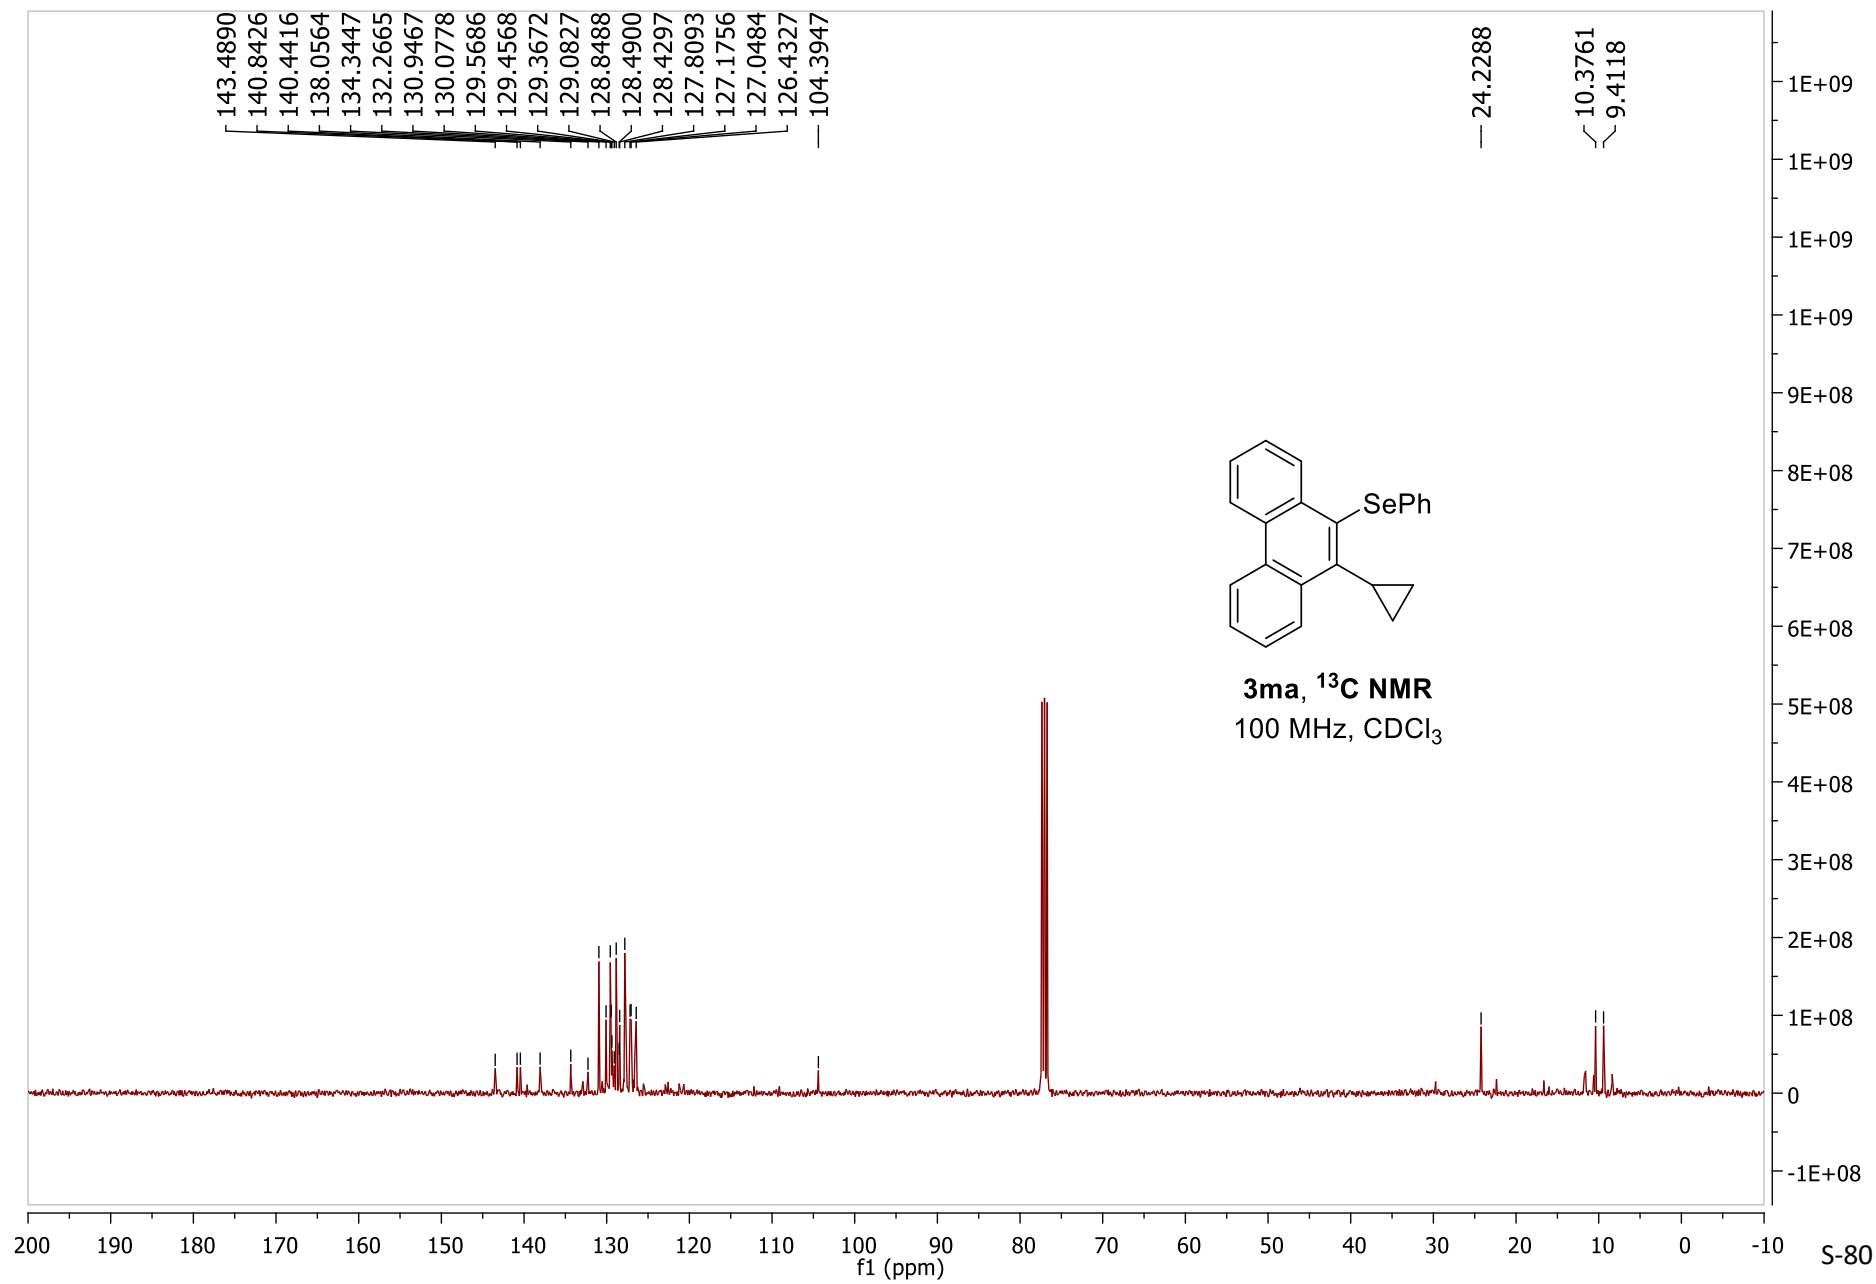

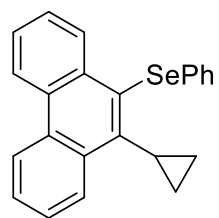

**3ma,  $^{77}\text{Se}$  NMR**  
76 MHz,  $\text{CDCl}_3$

— 410.6948

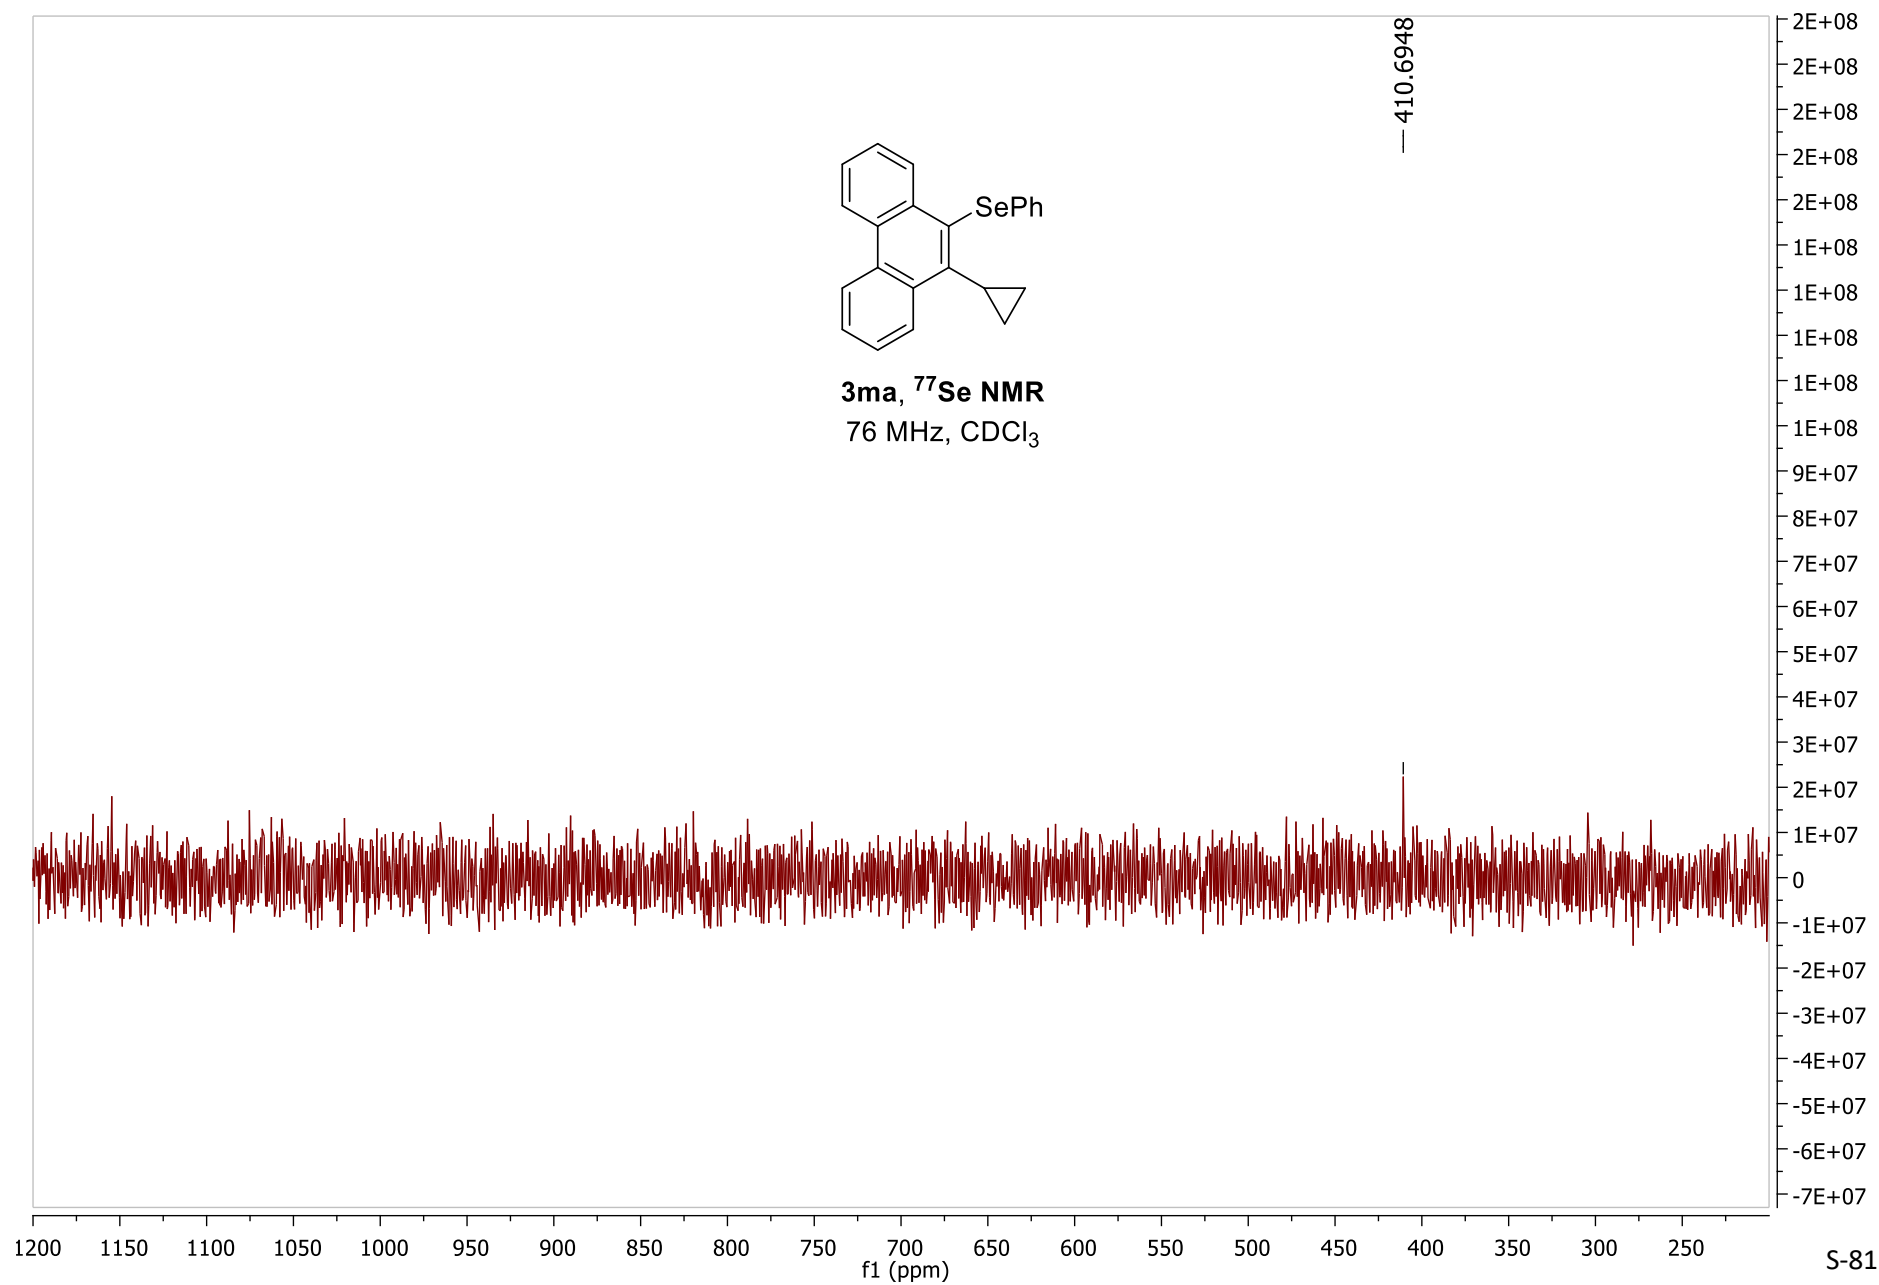

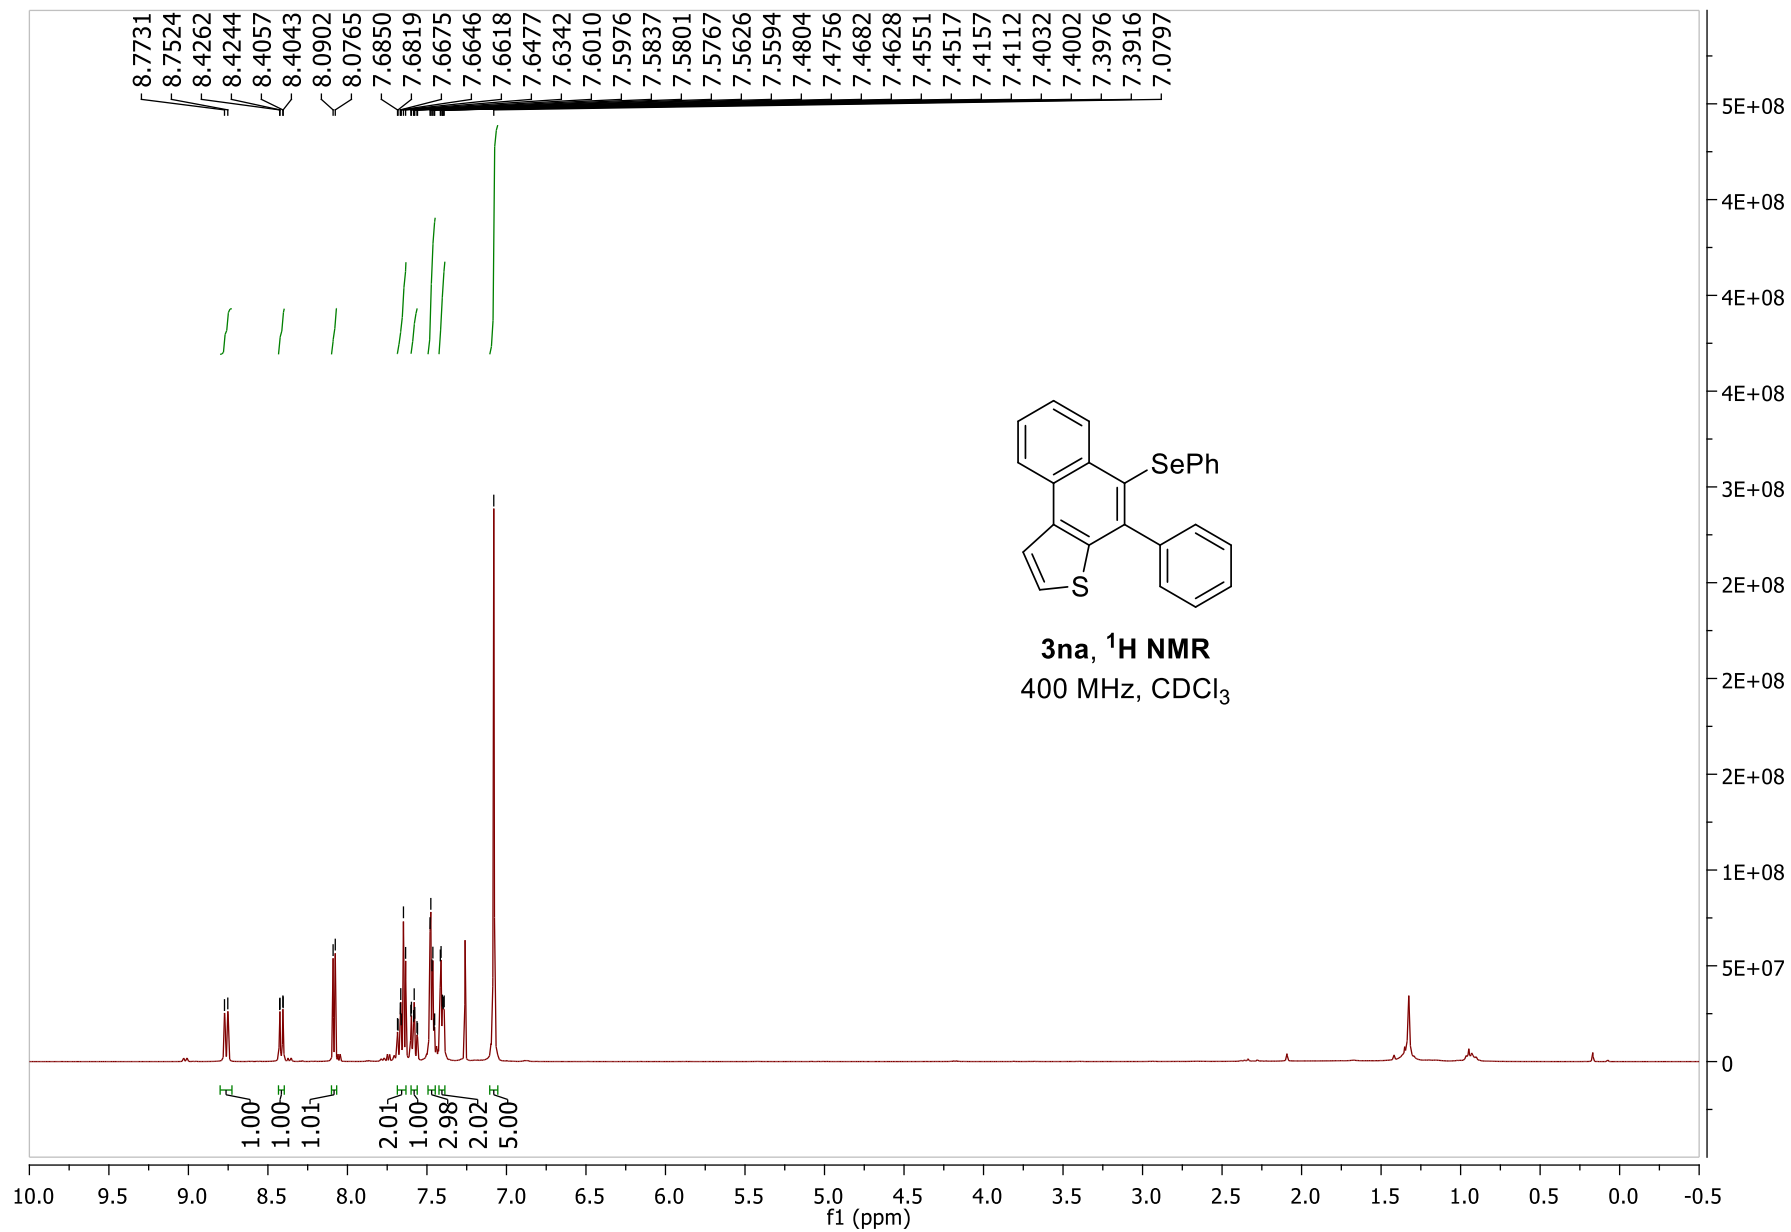

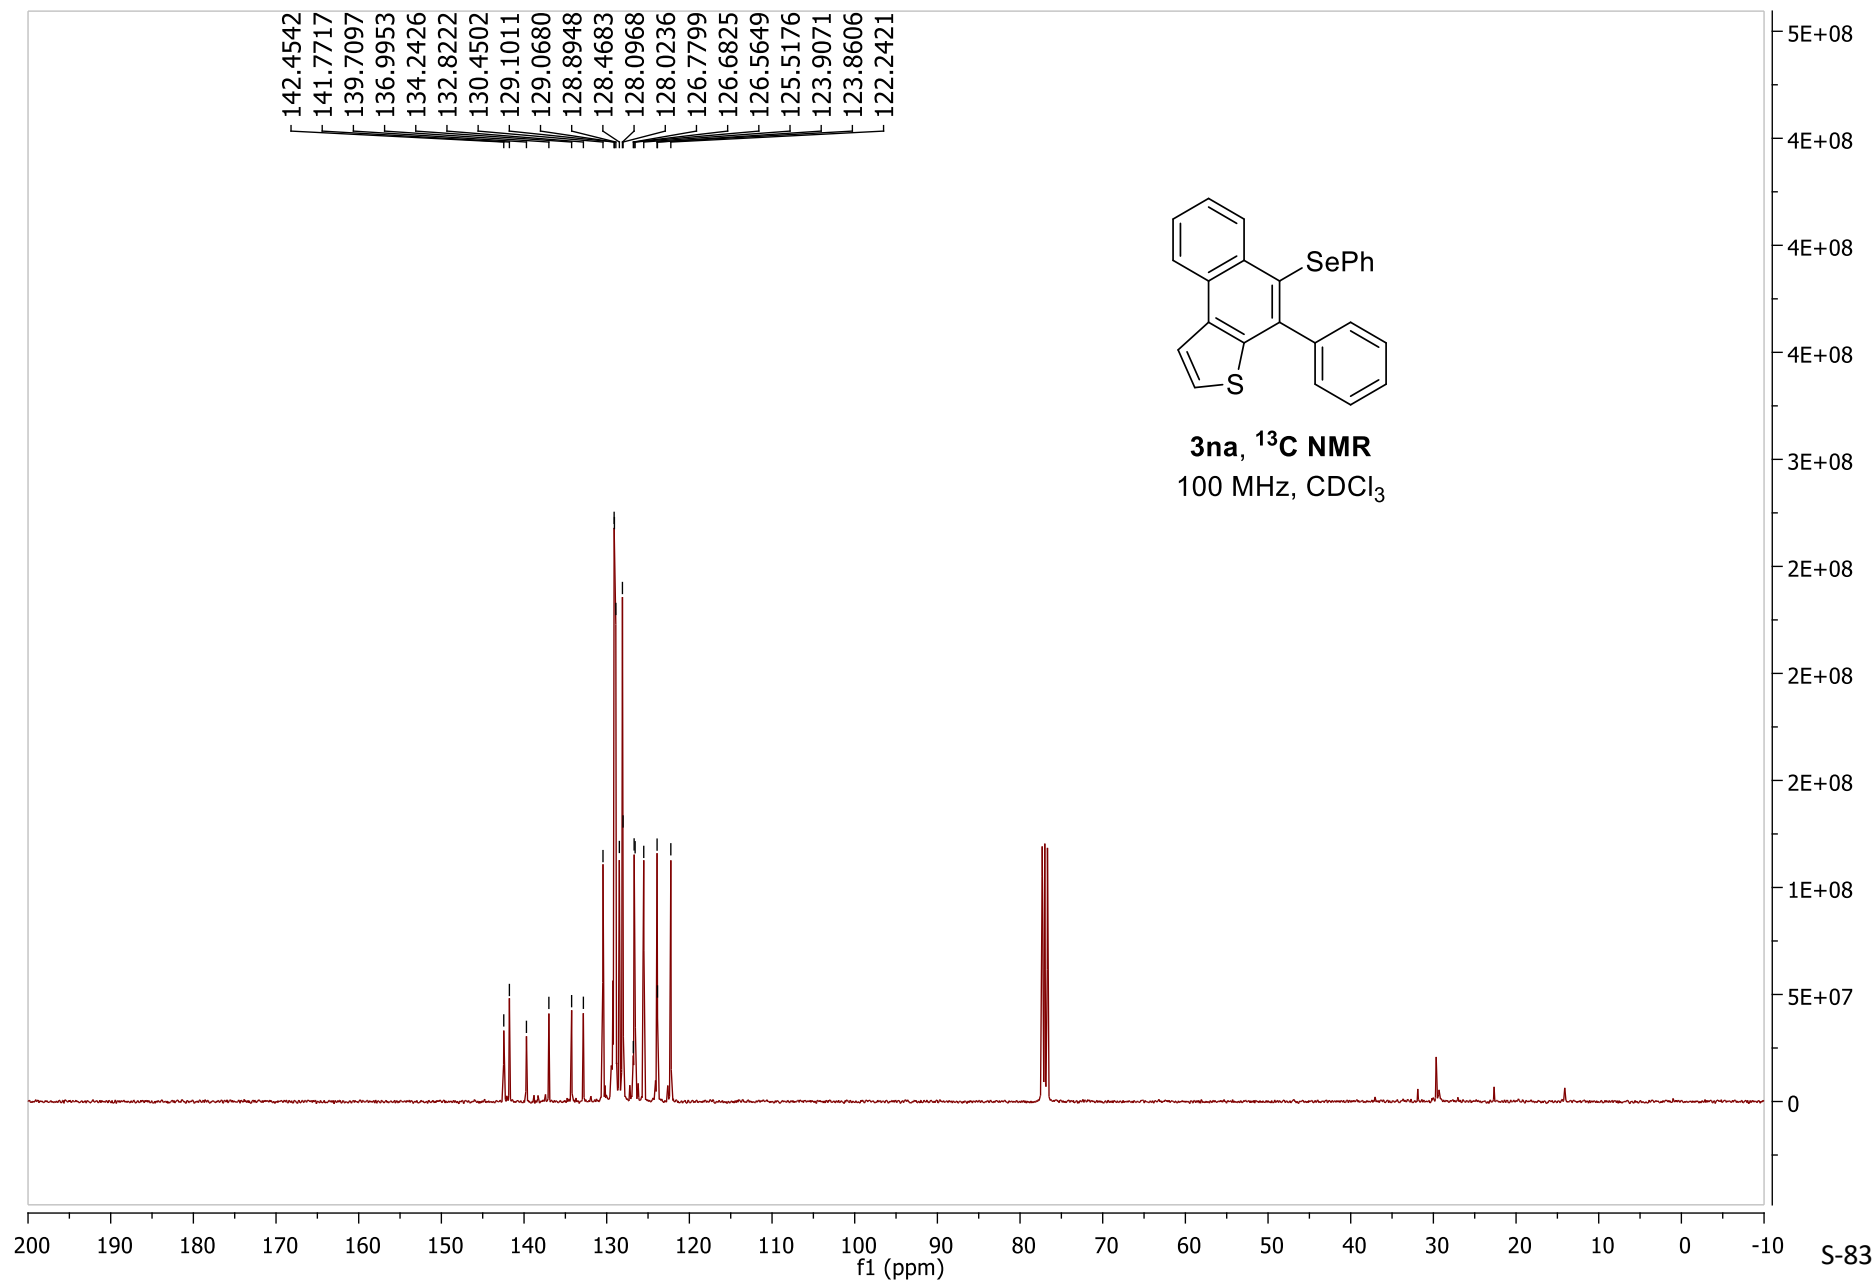

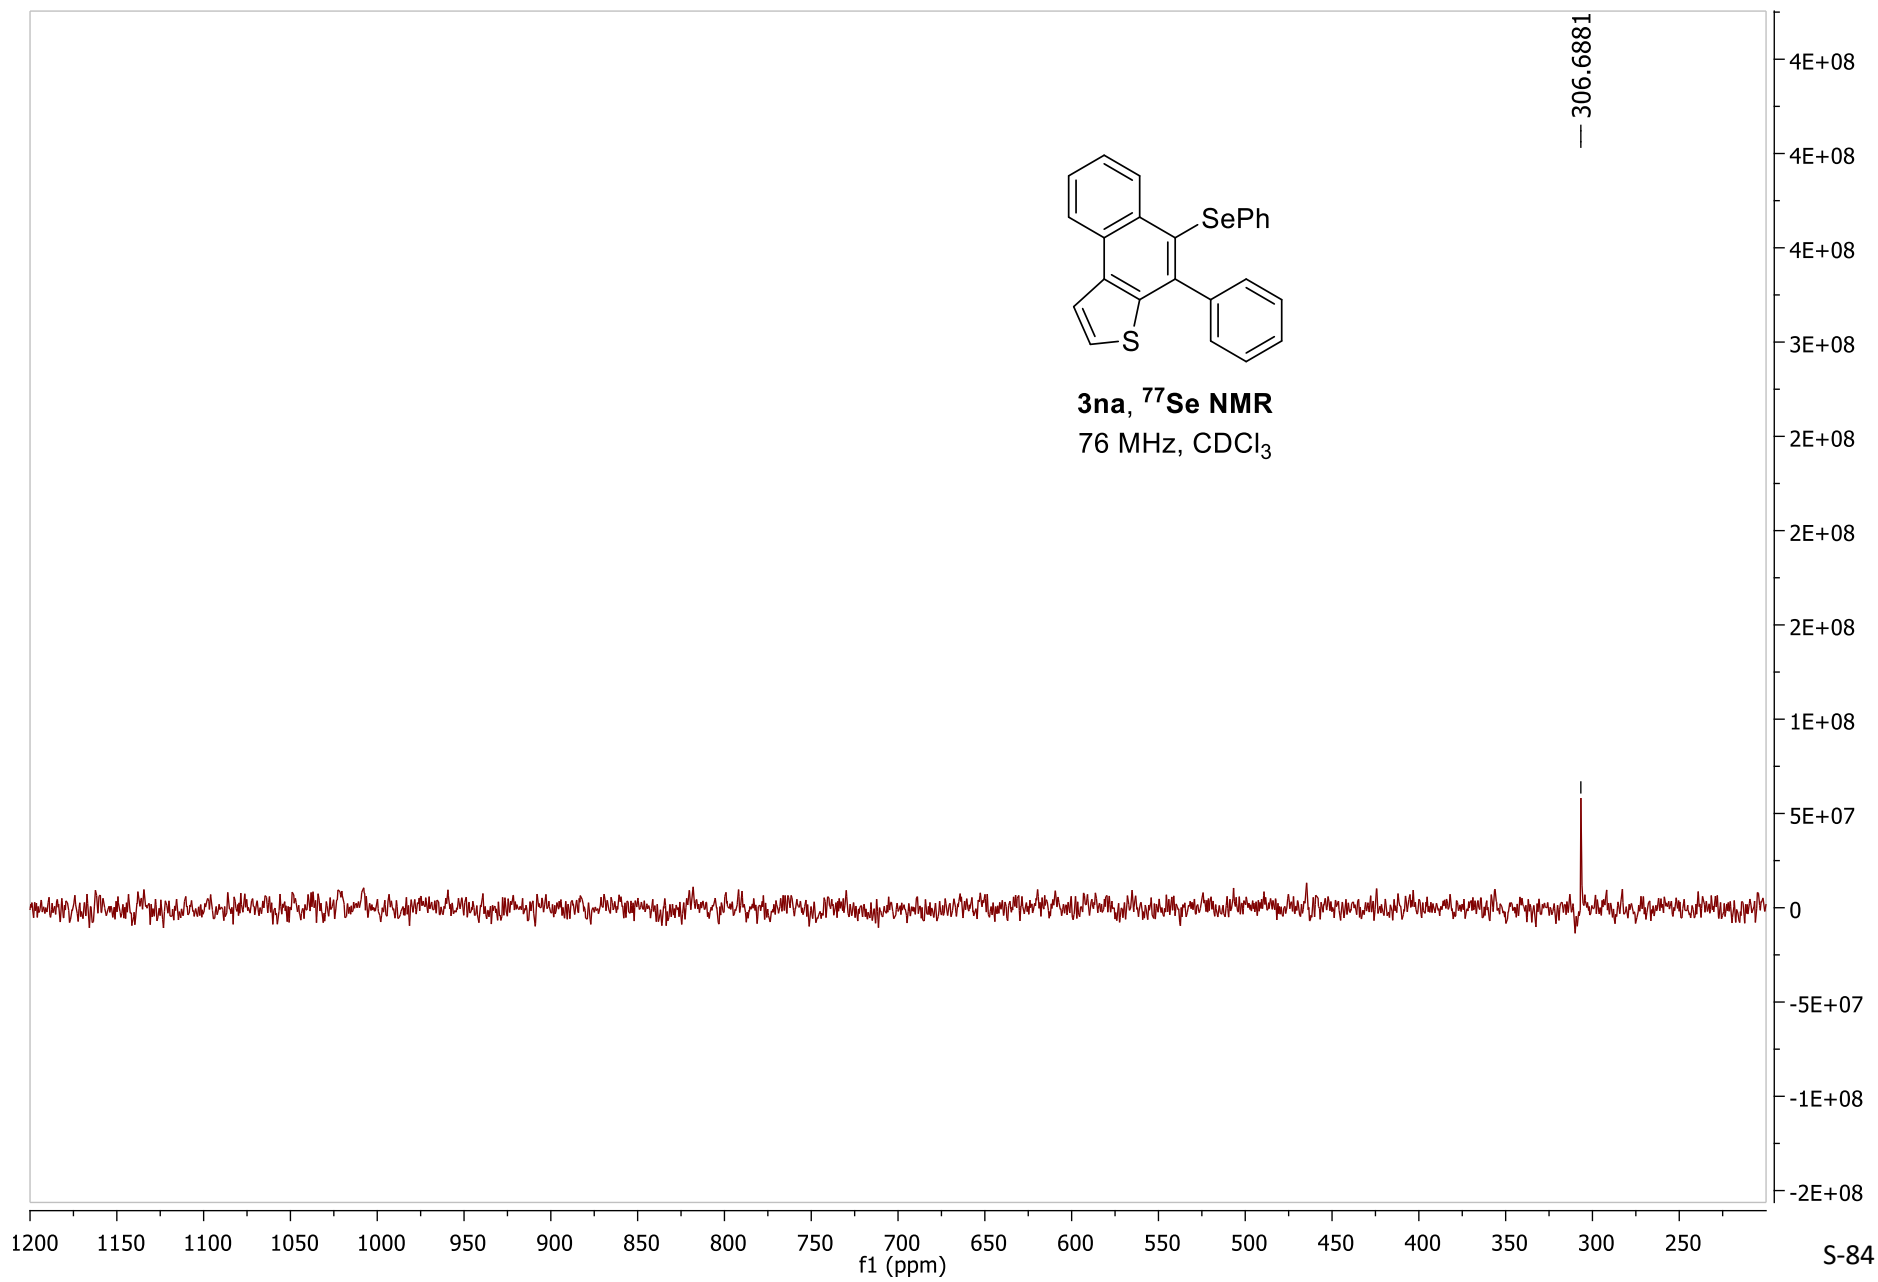

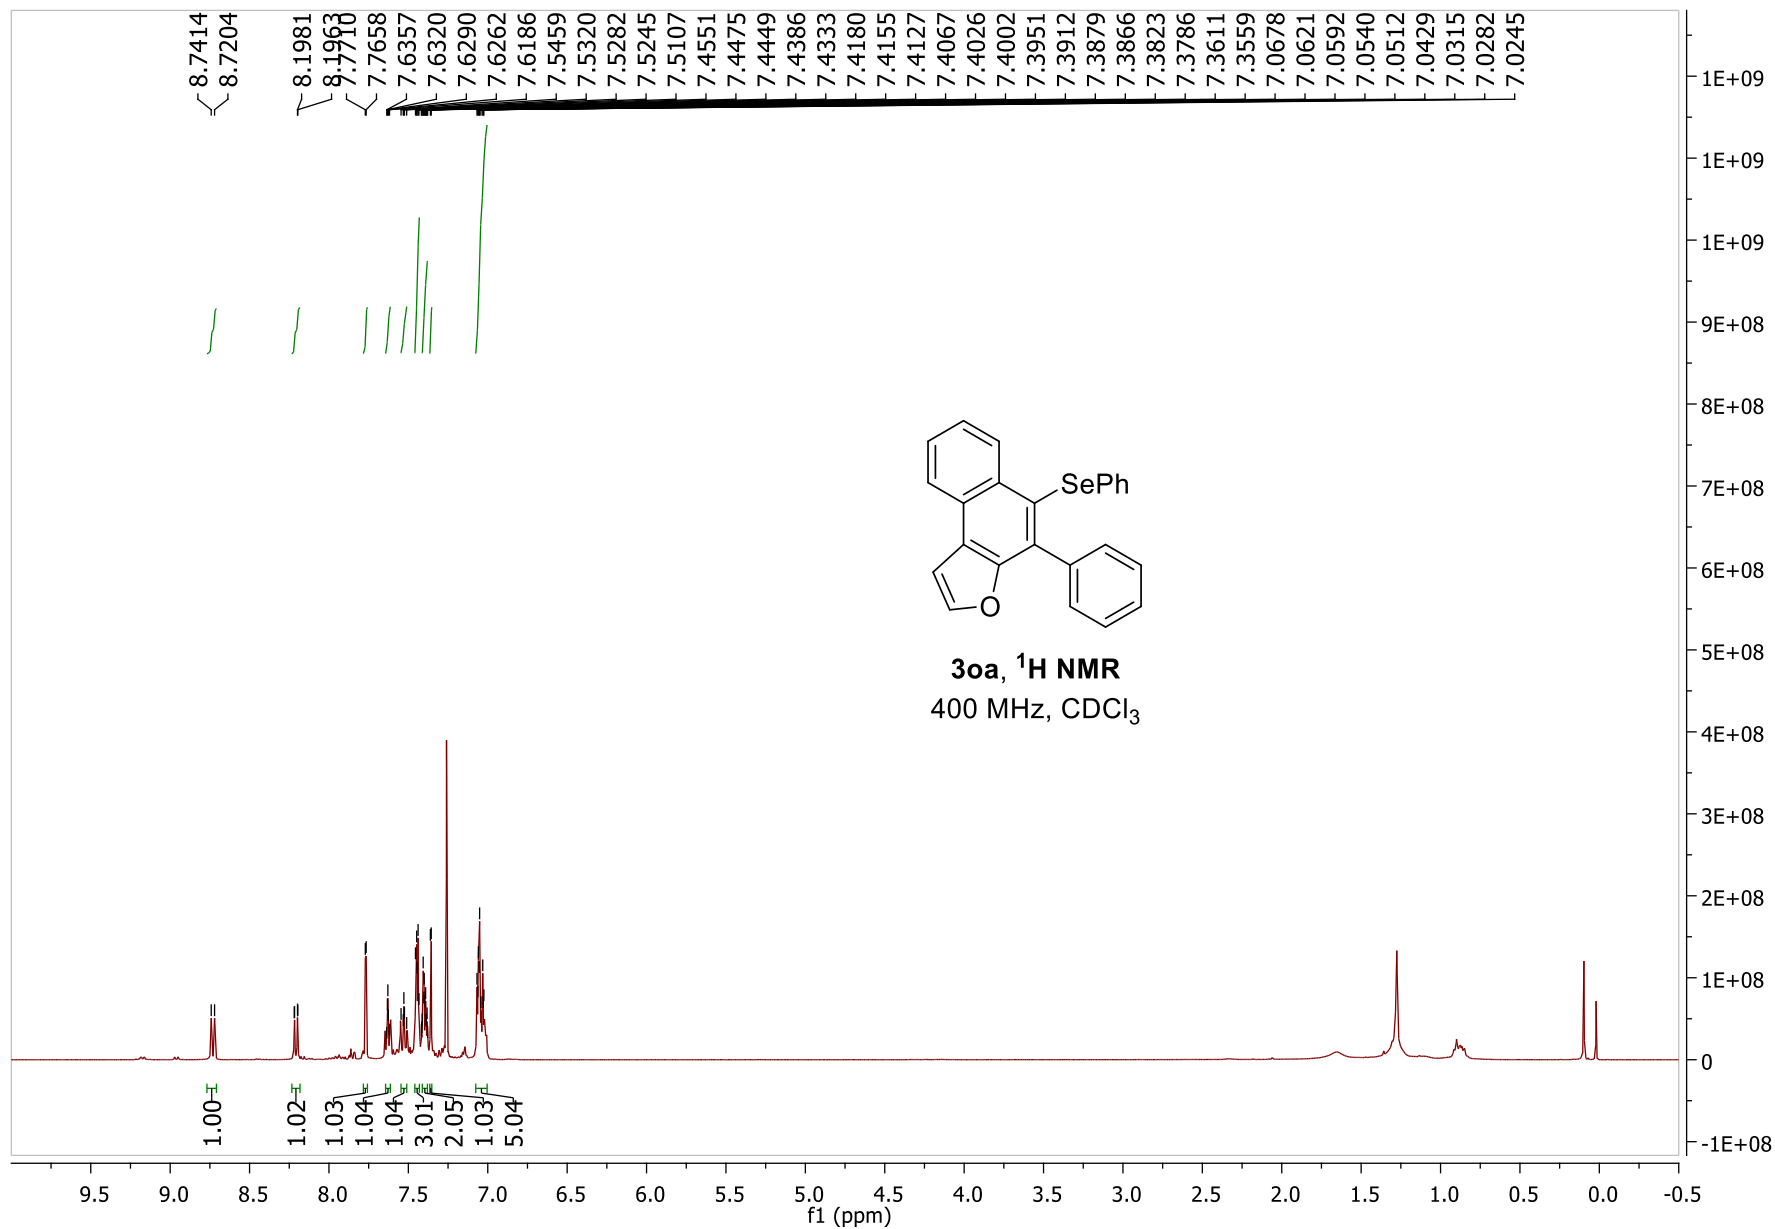

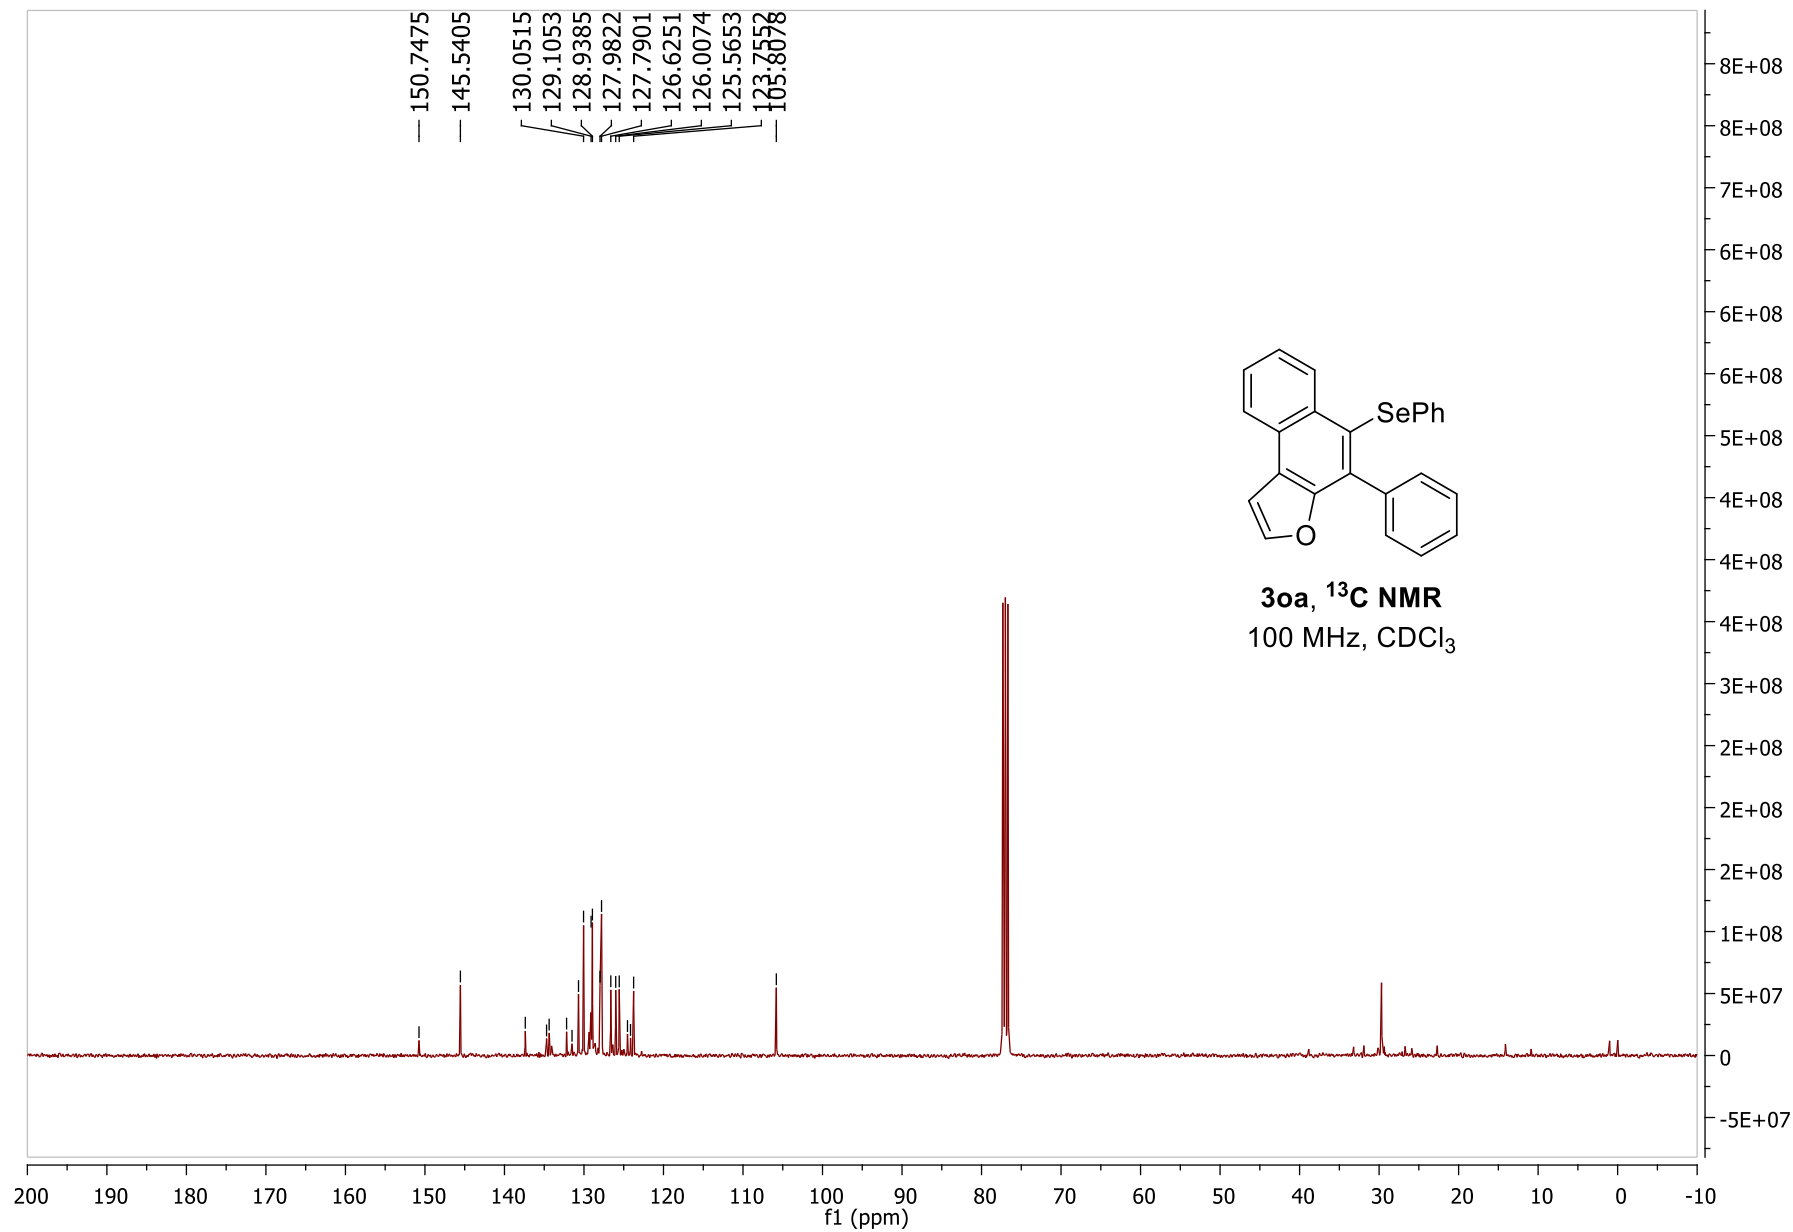

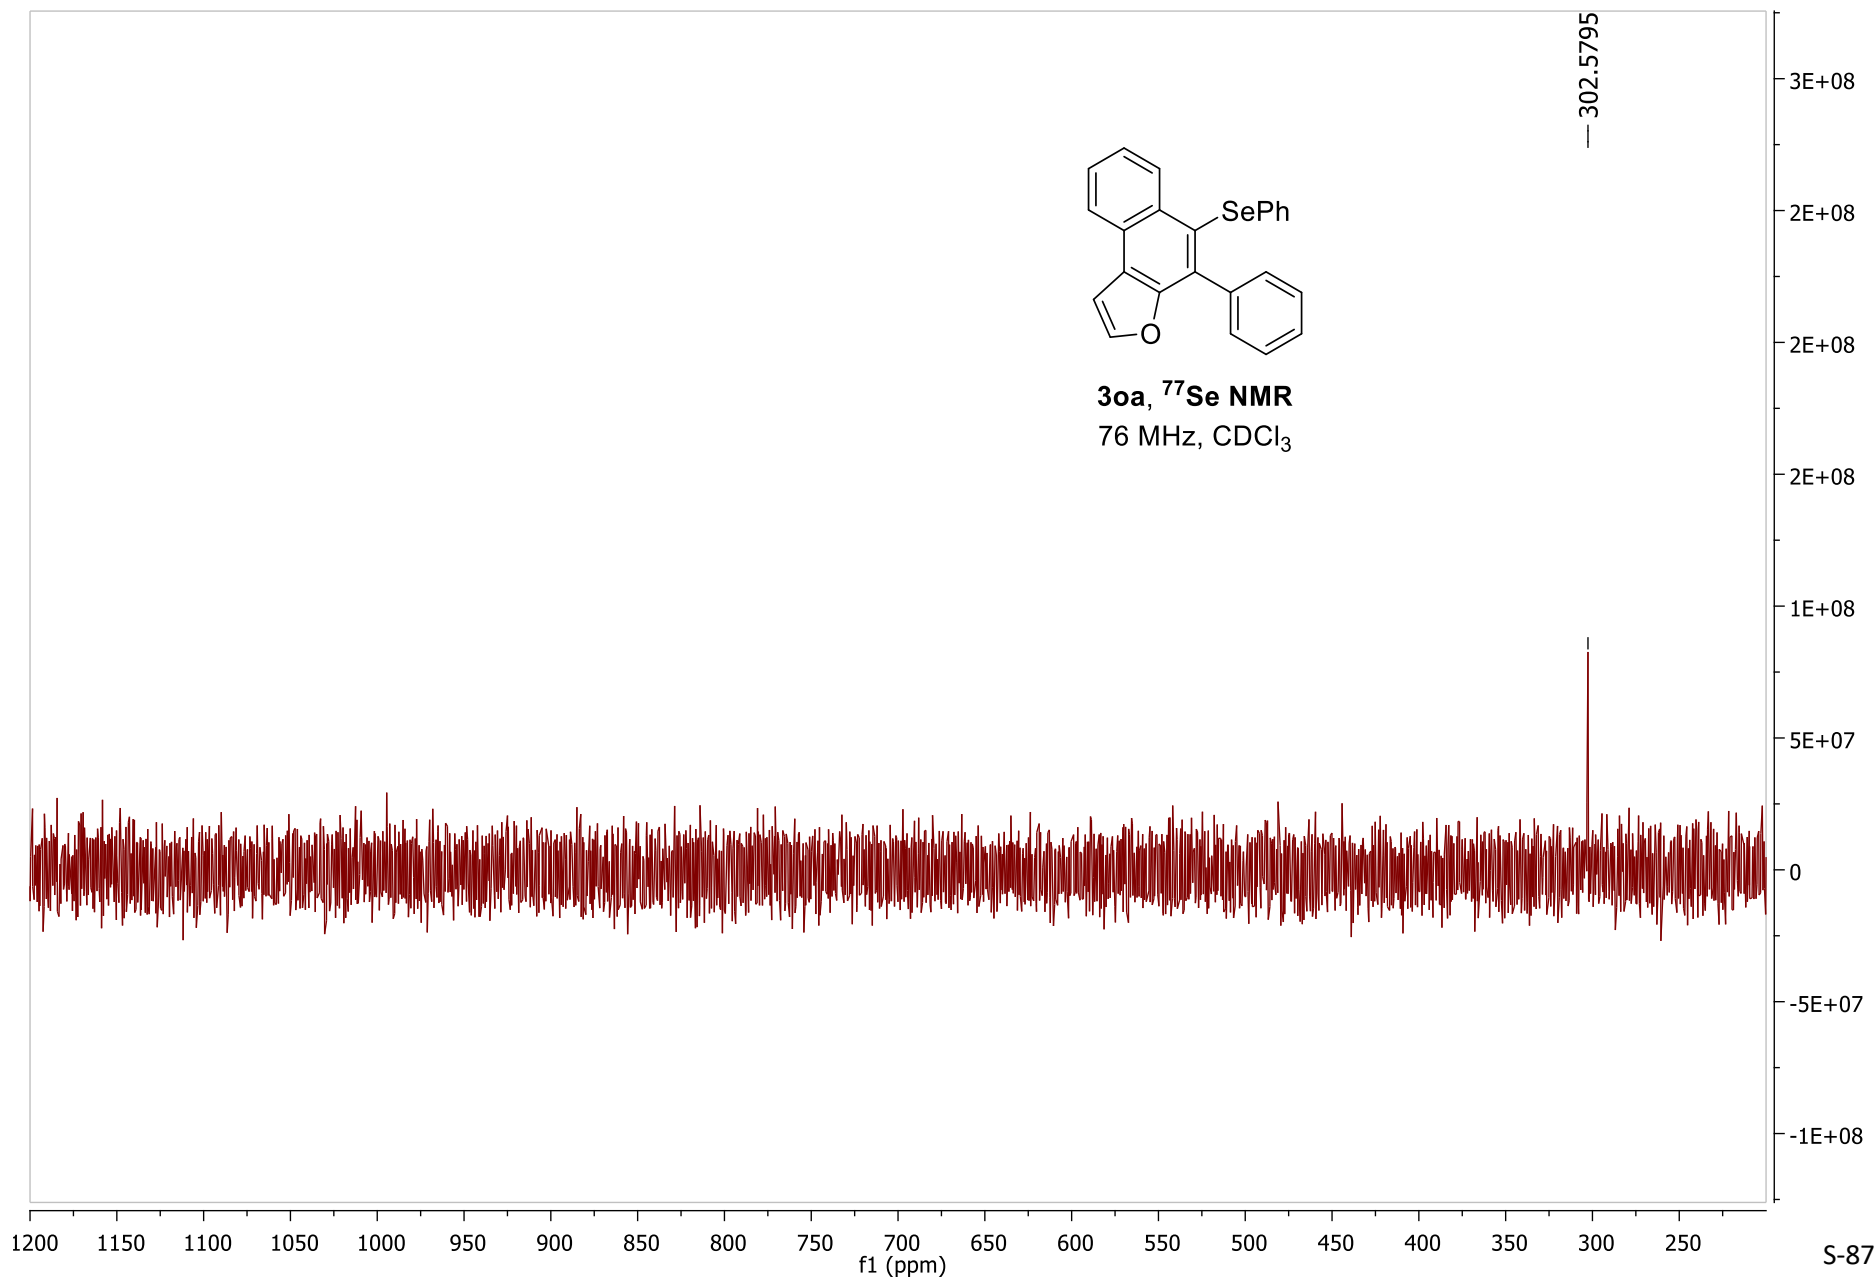

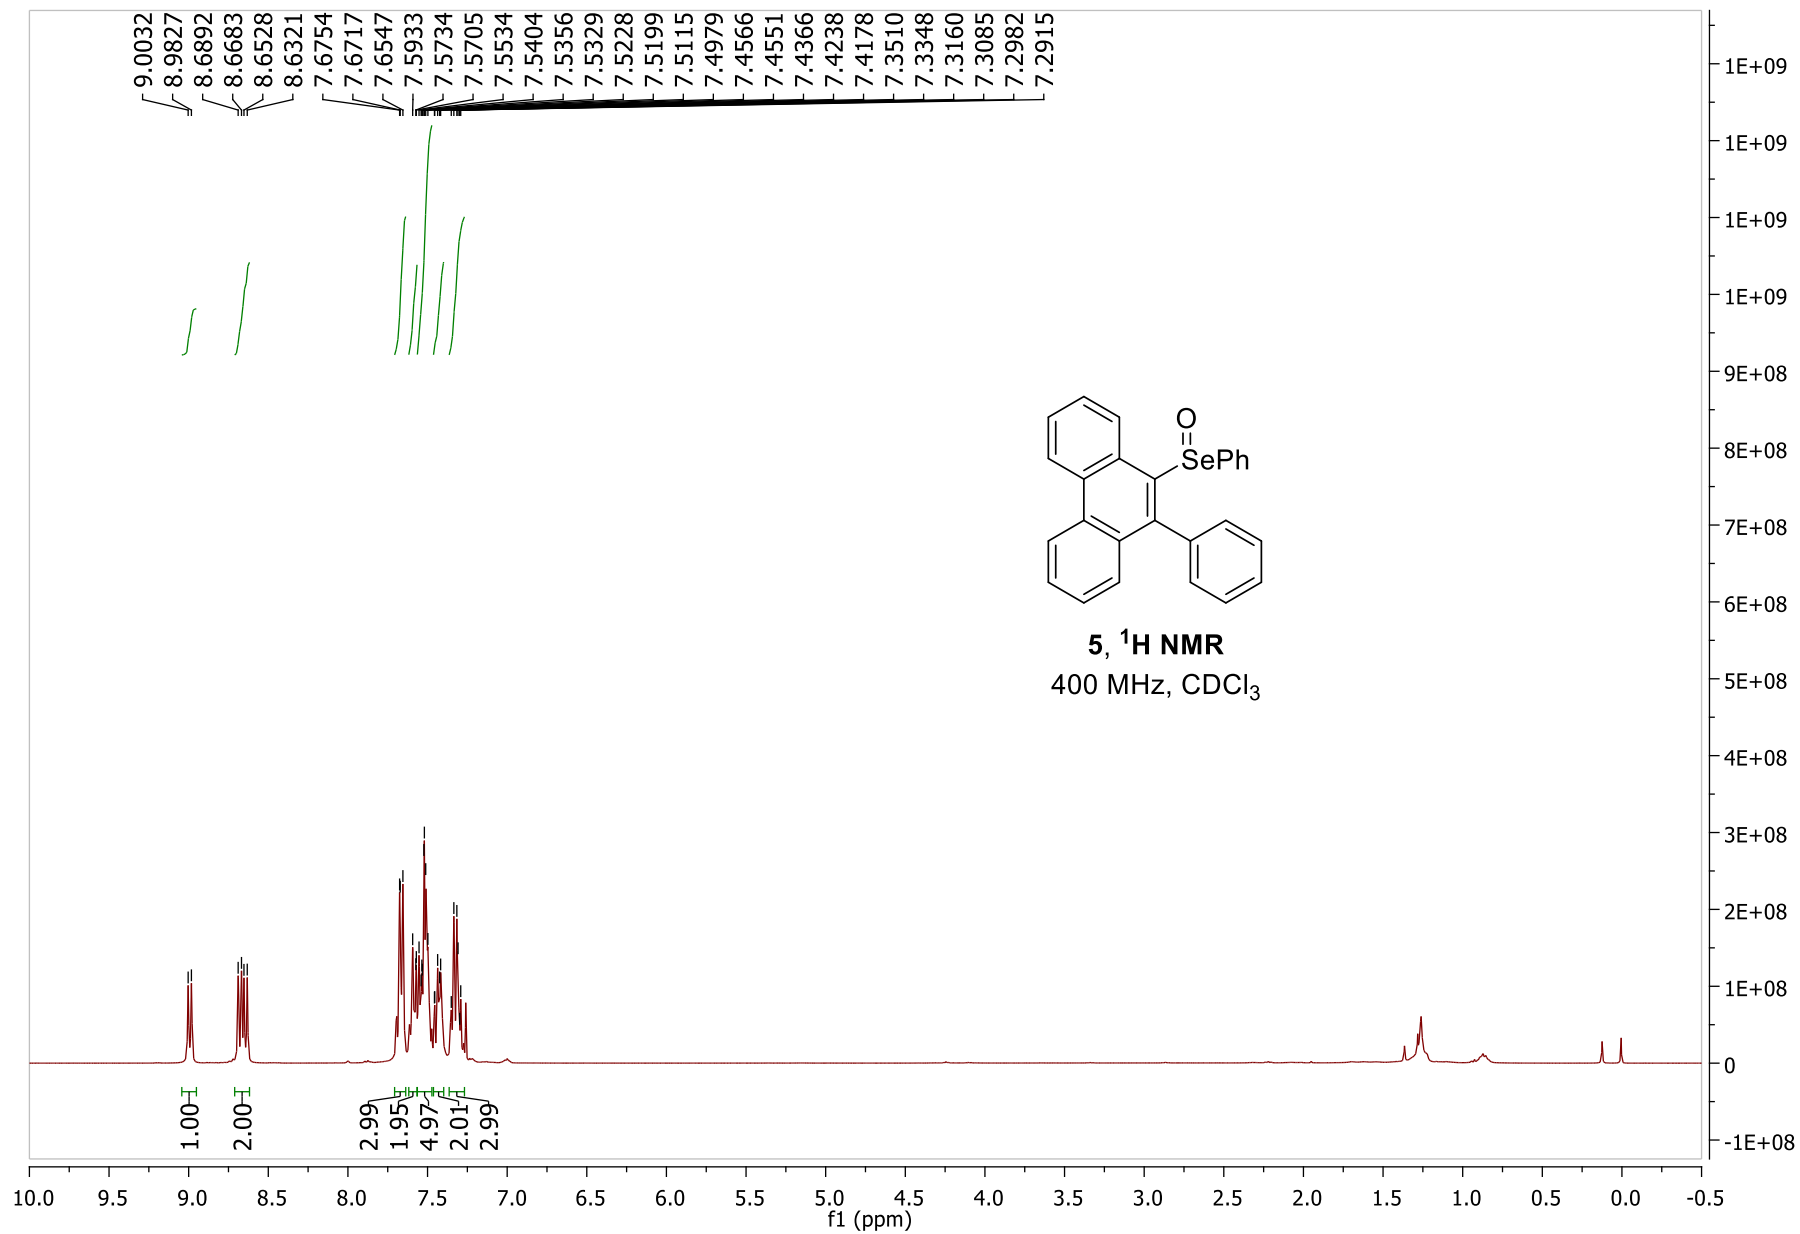

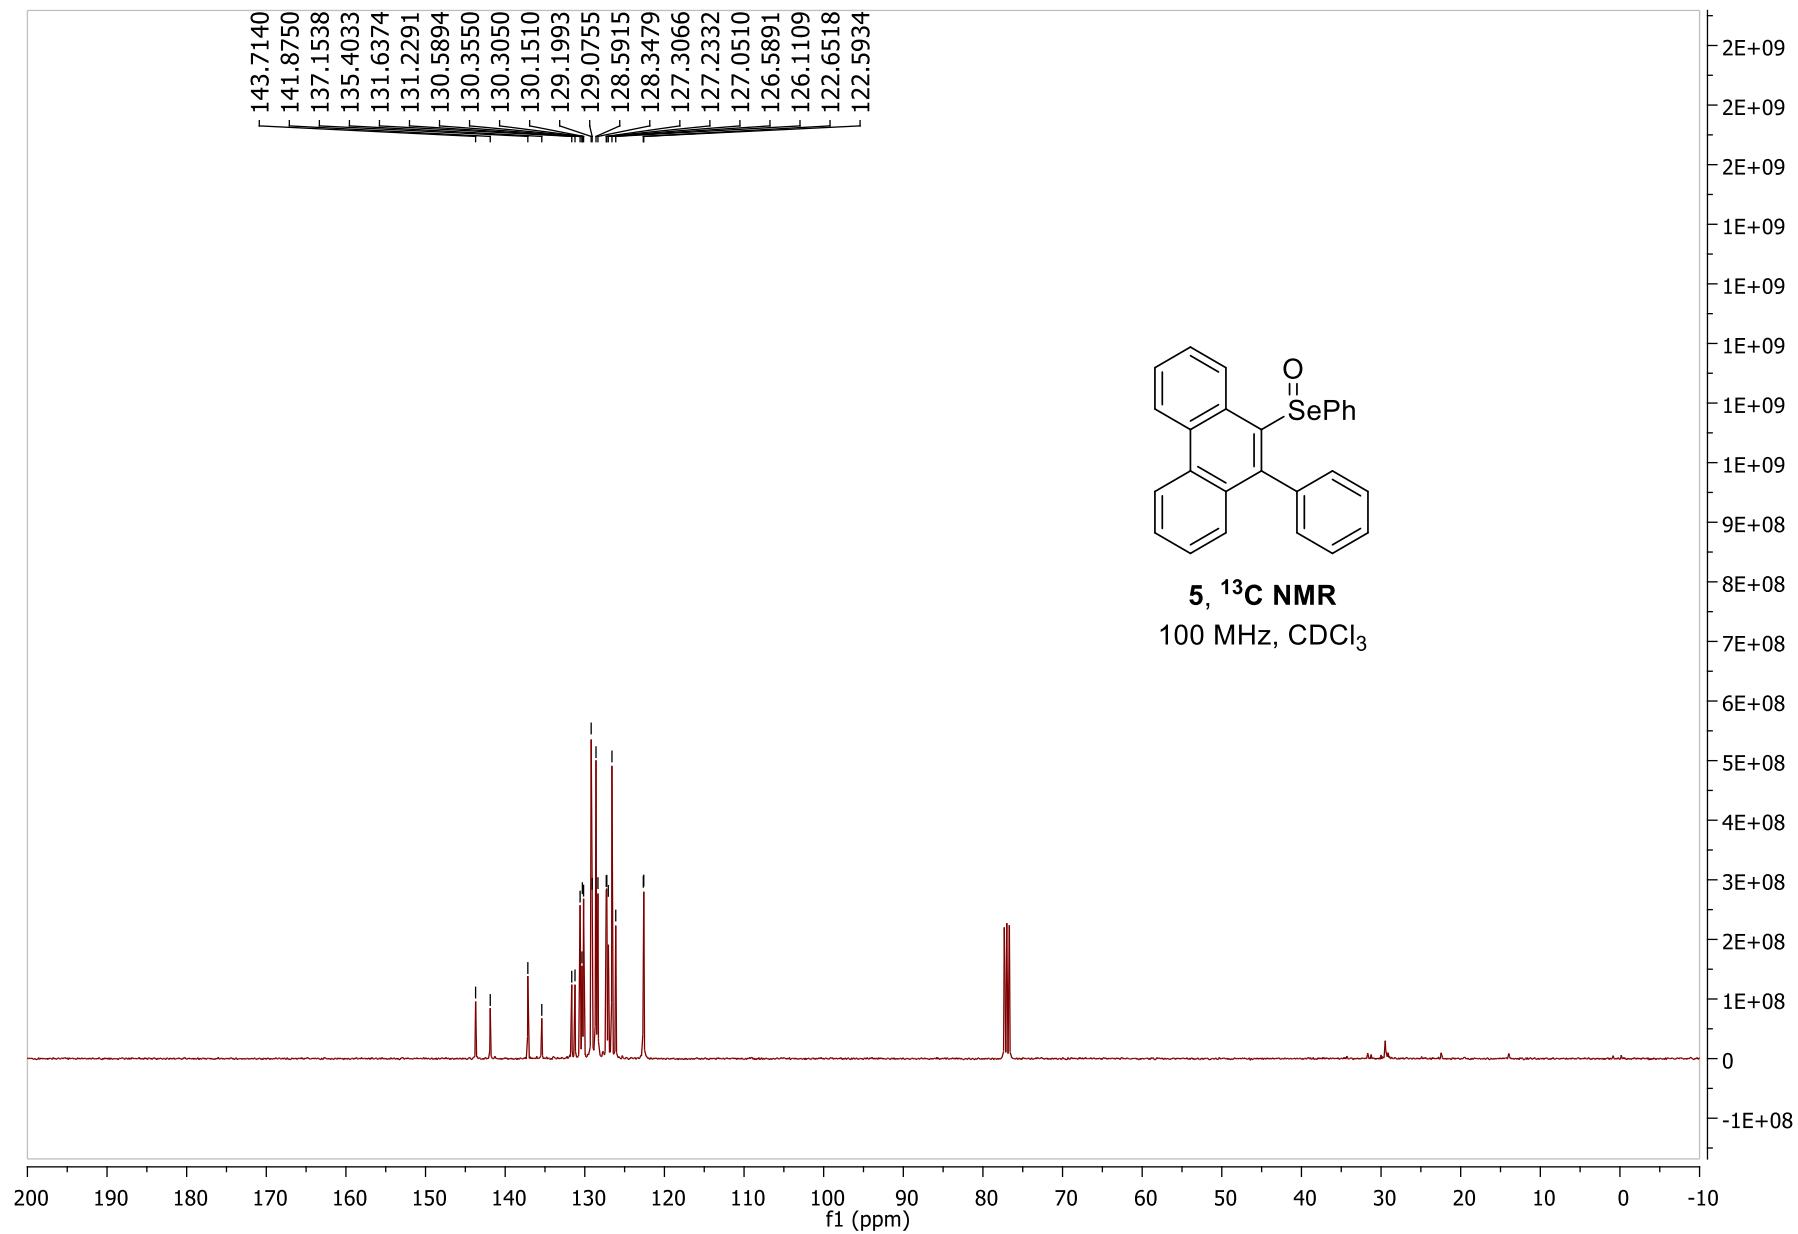

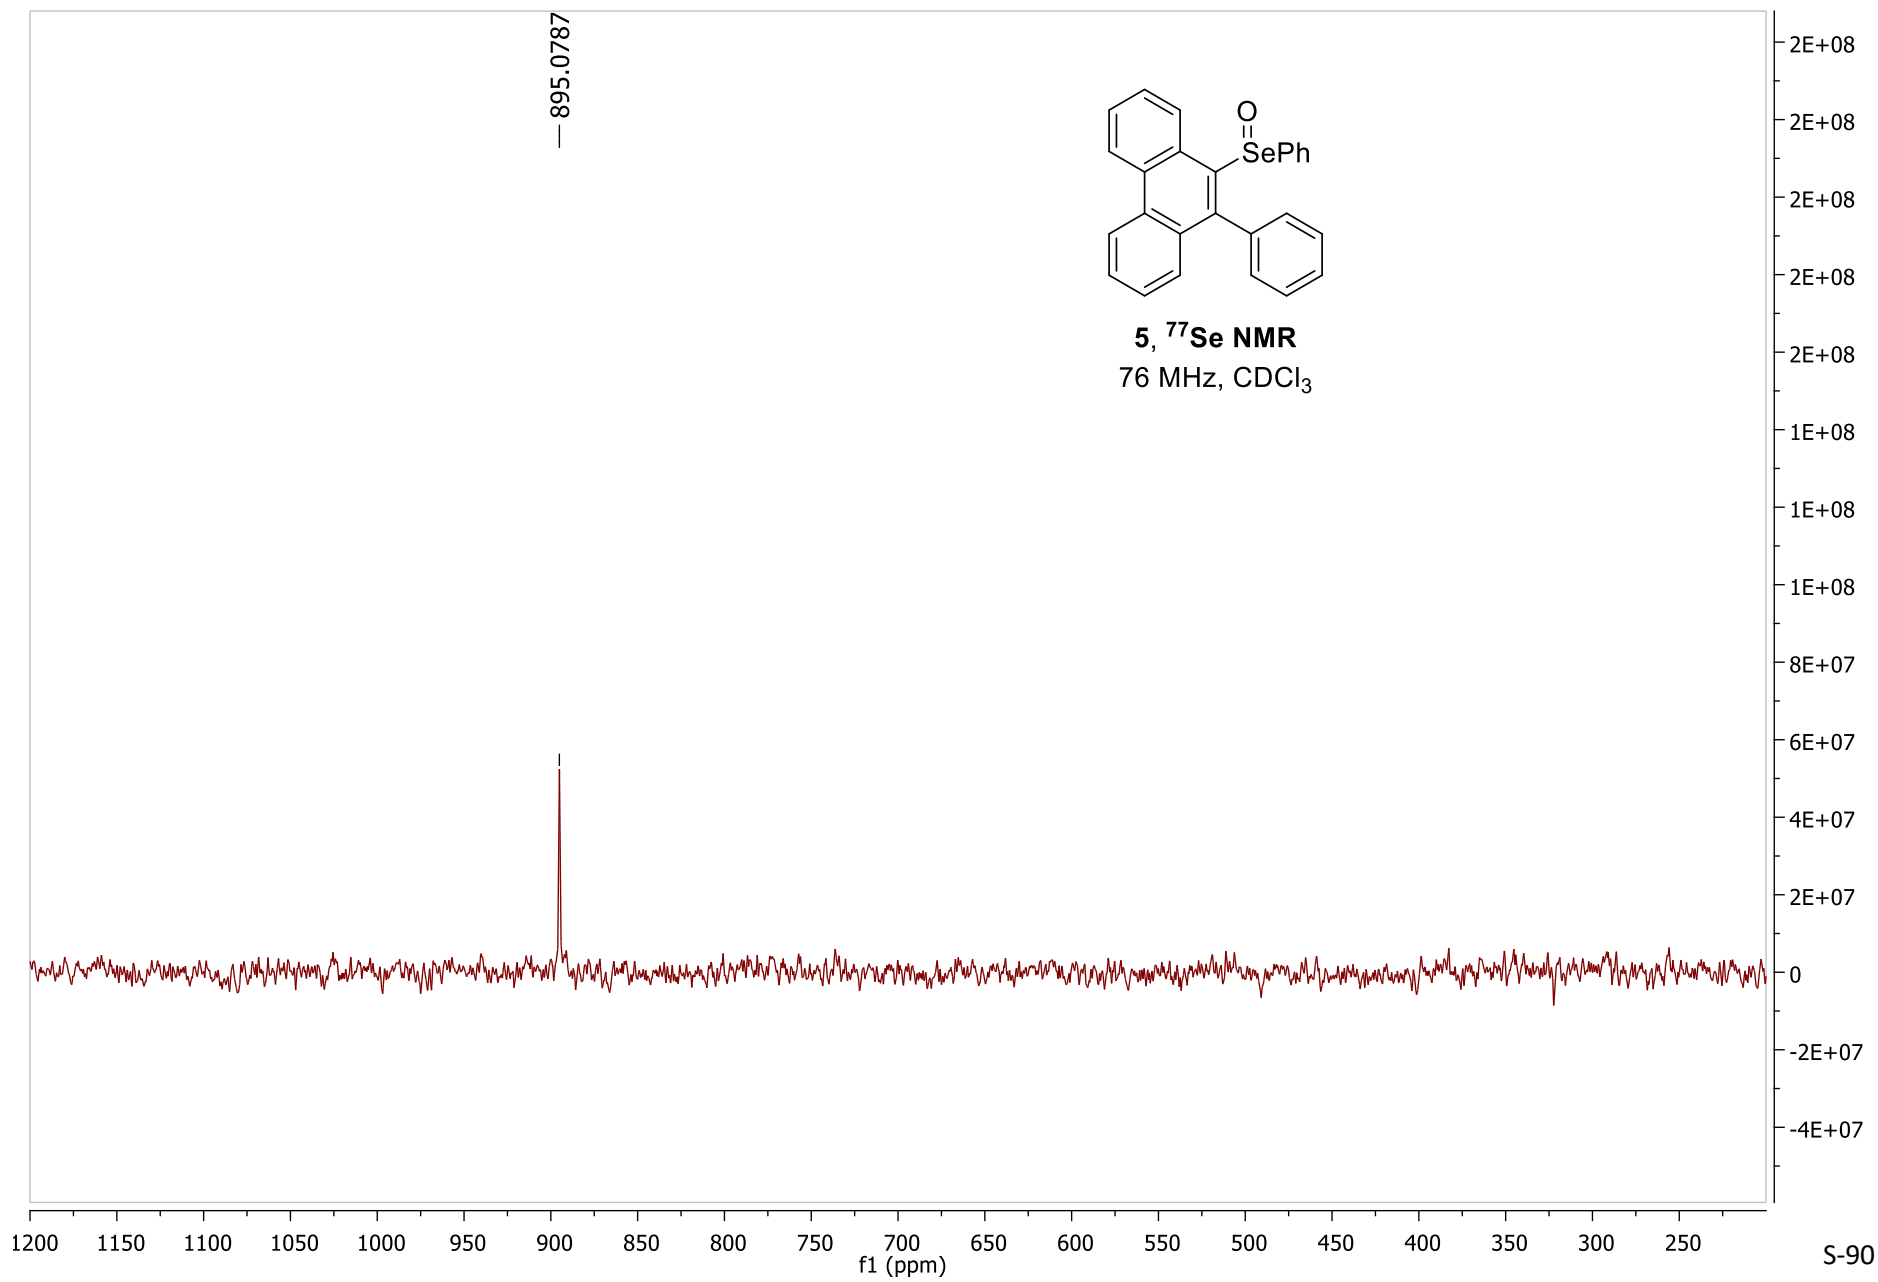

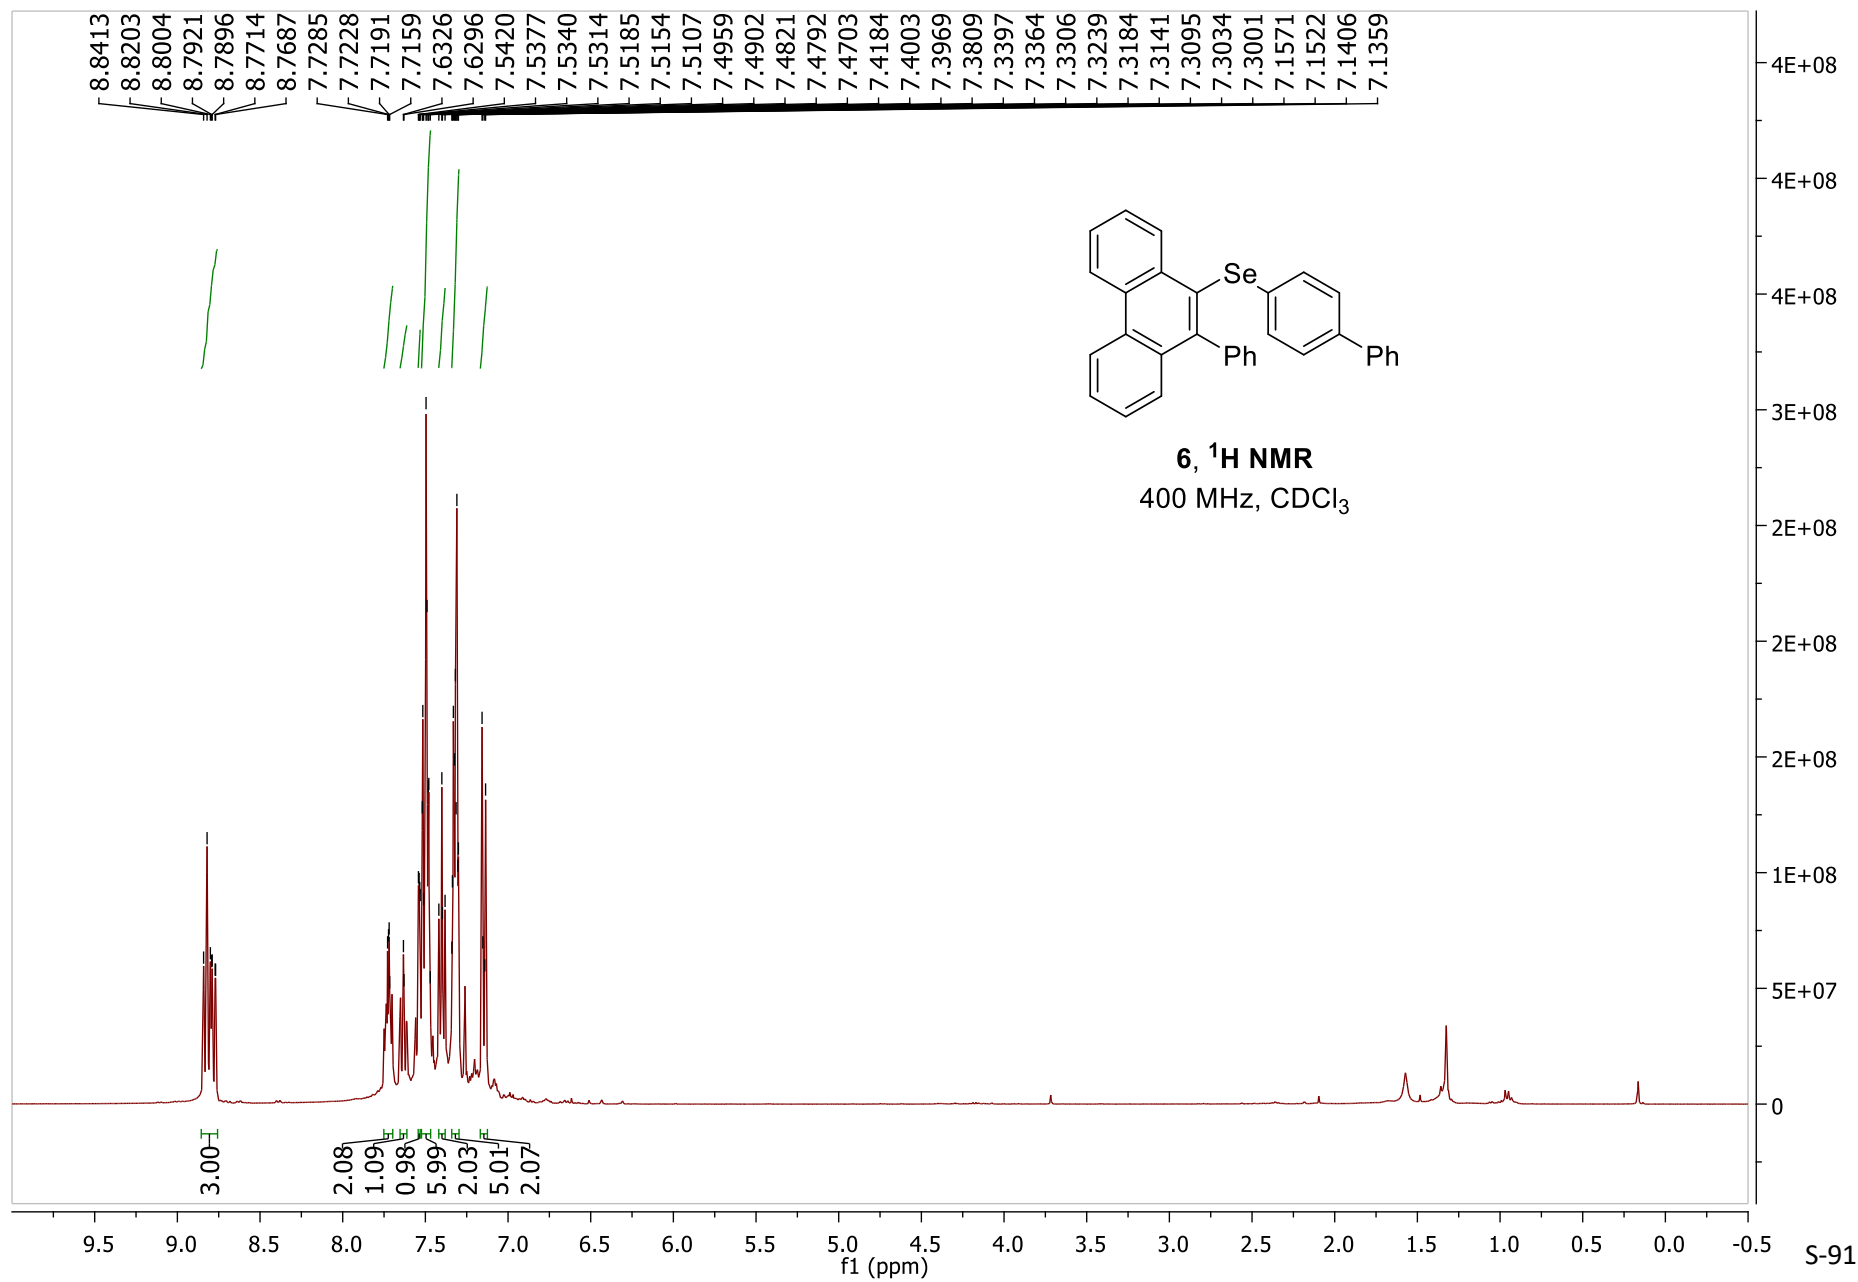

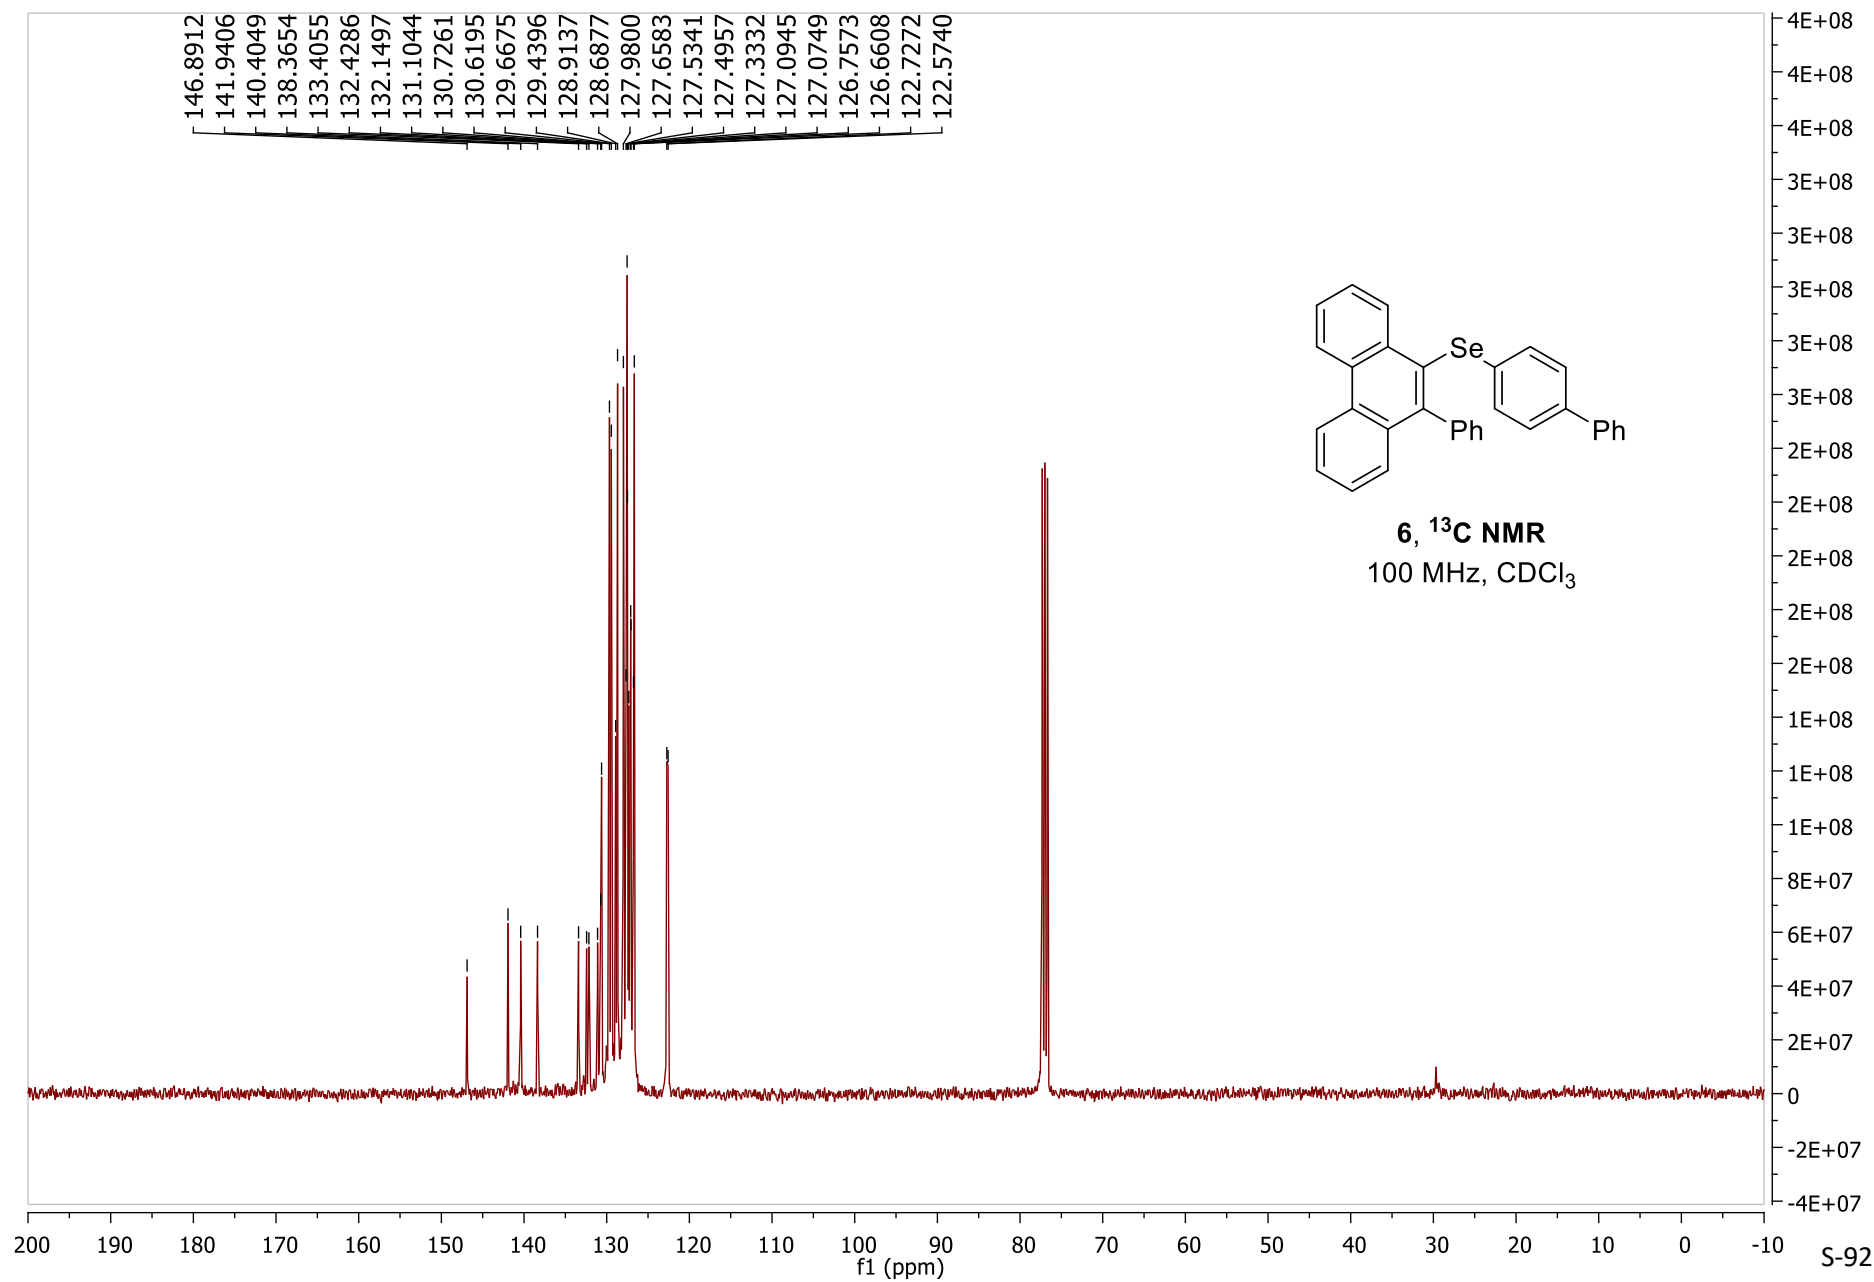

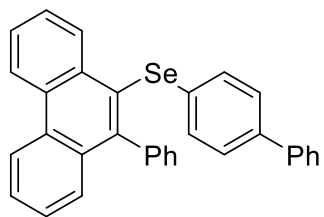

**6,  $^{77}\text{Se}$  NMR**  
76 MHz,  $\text{CDCl}_3$

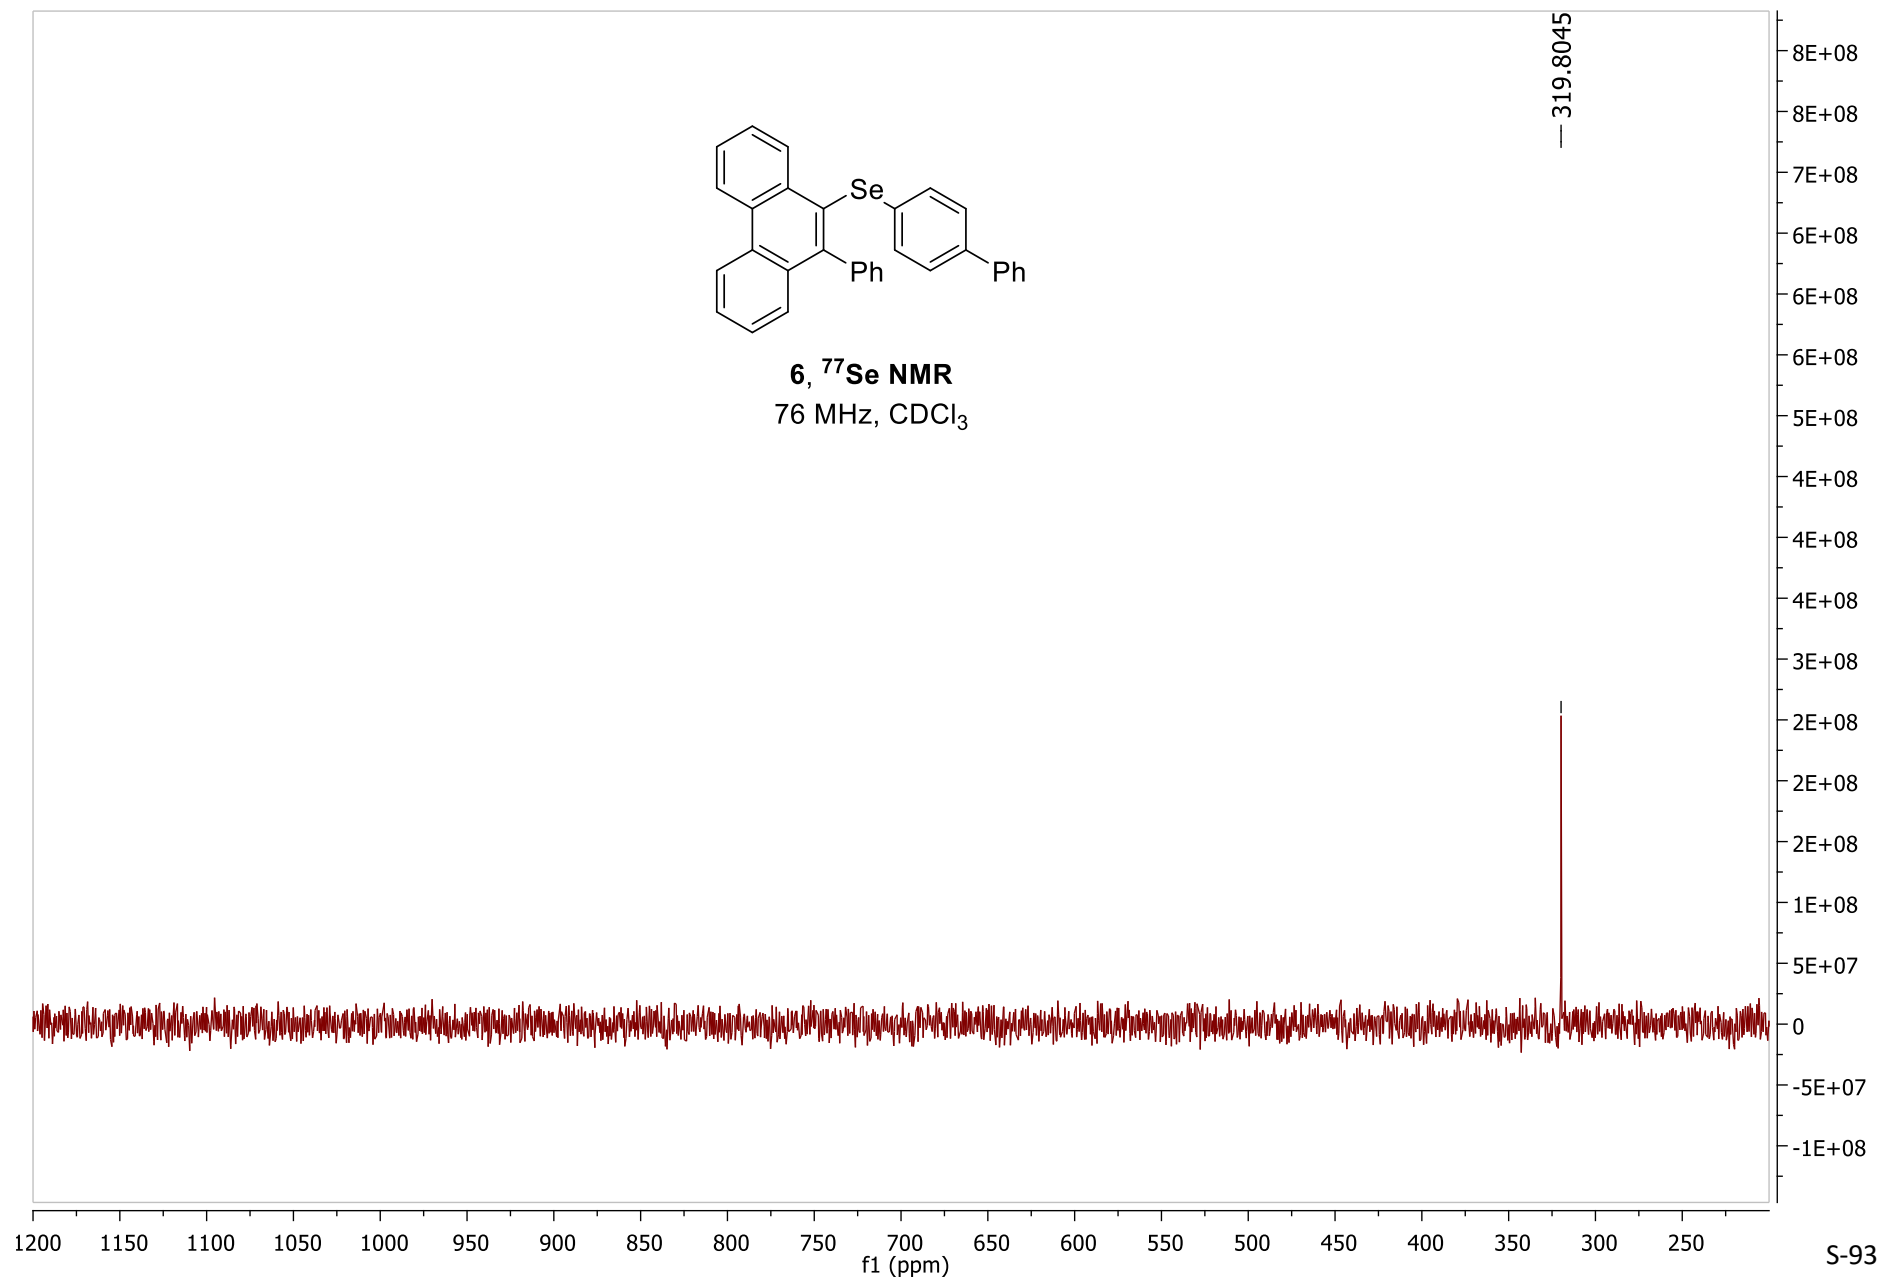

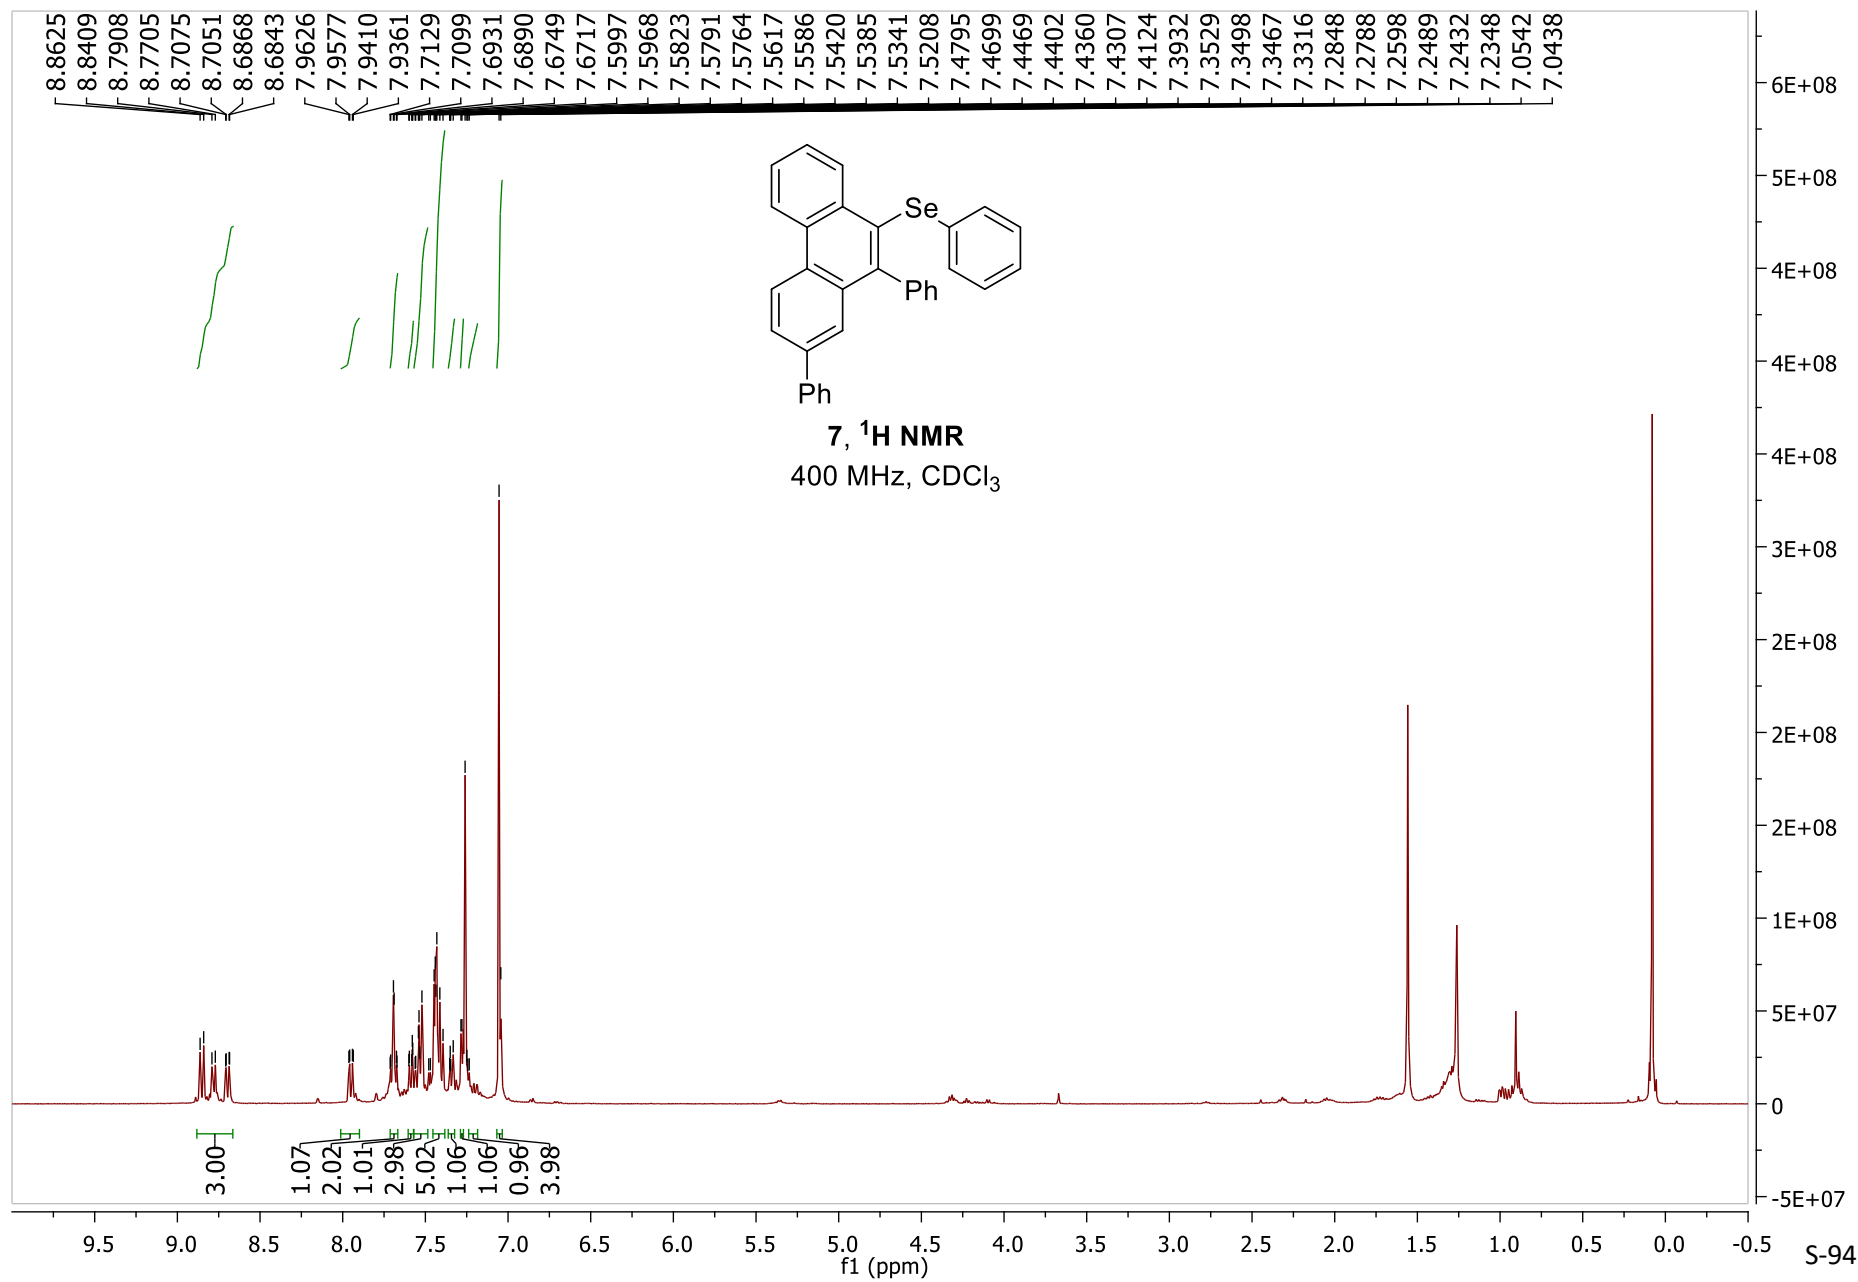

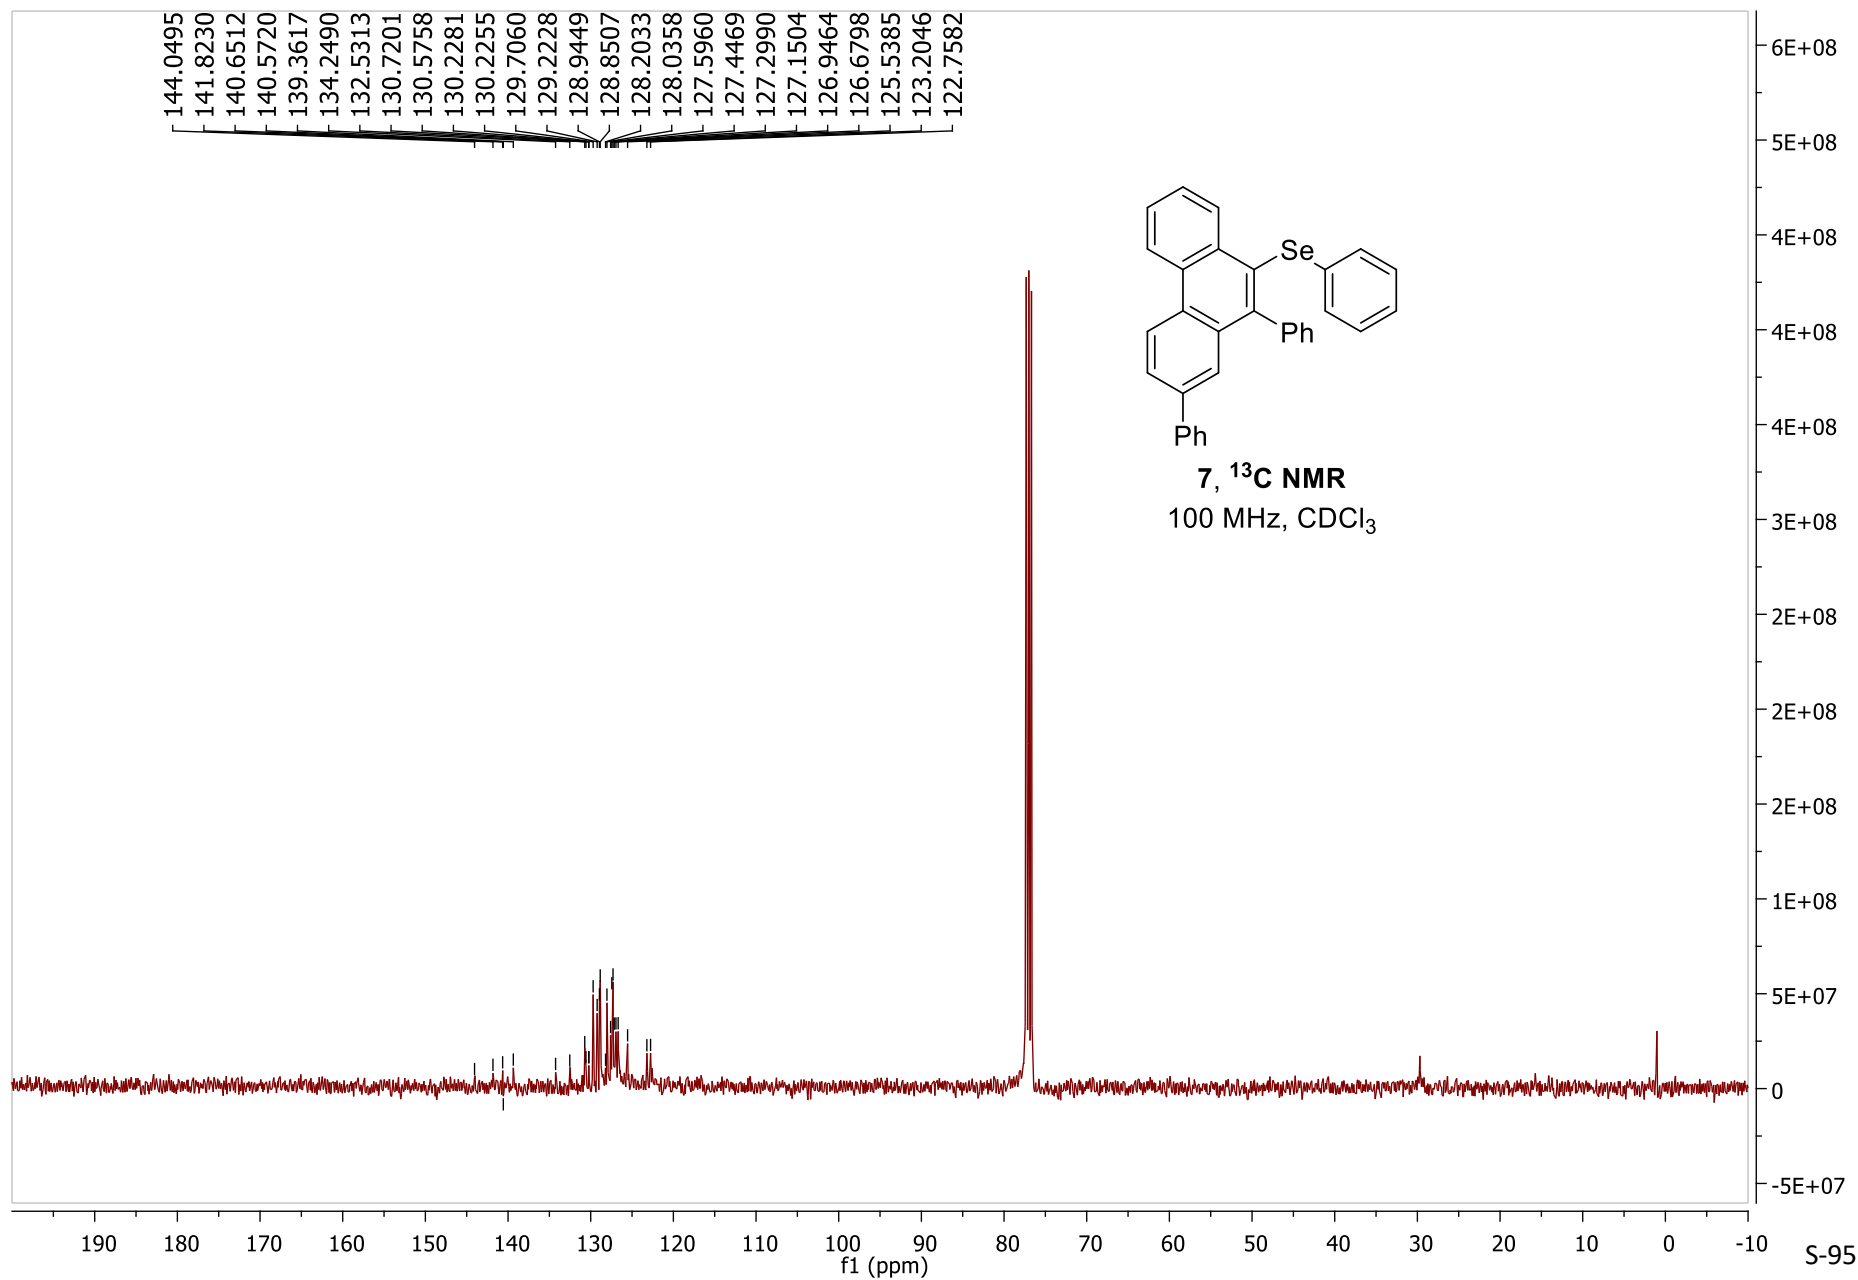

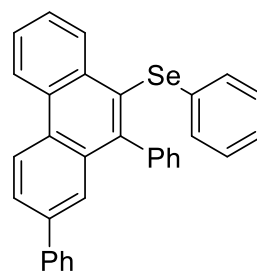

7, <sup>77</sup>Se NMR  
76 MHz, CDCl<sub>3</sub>

— 324.0382

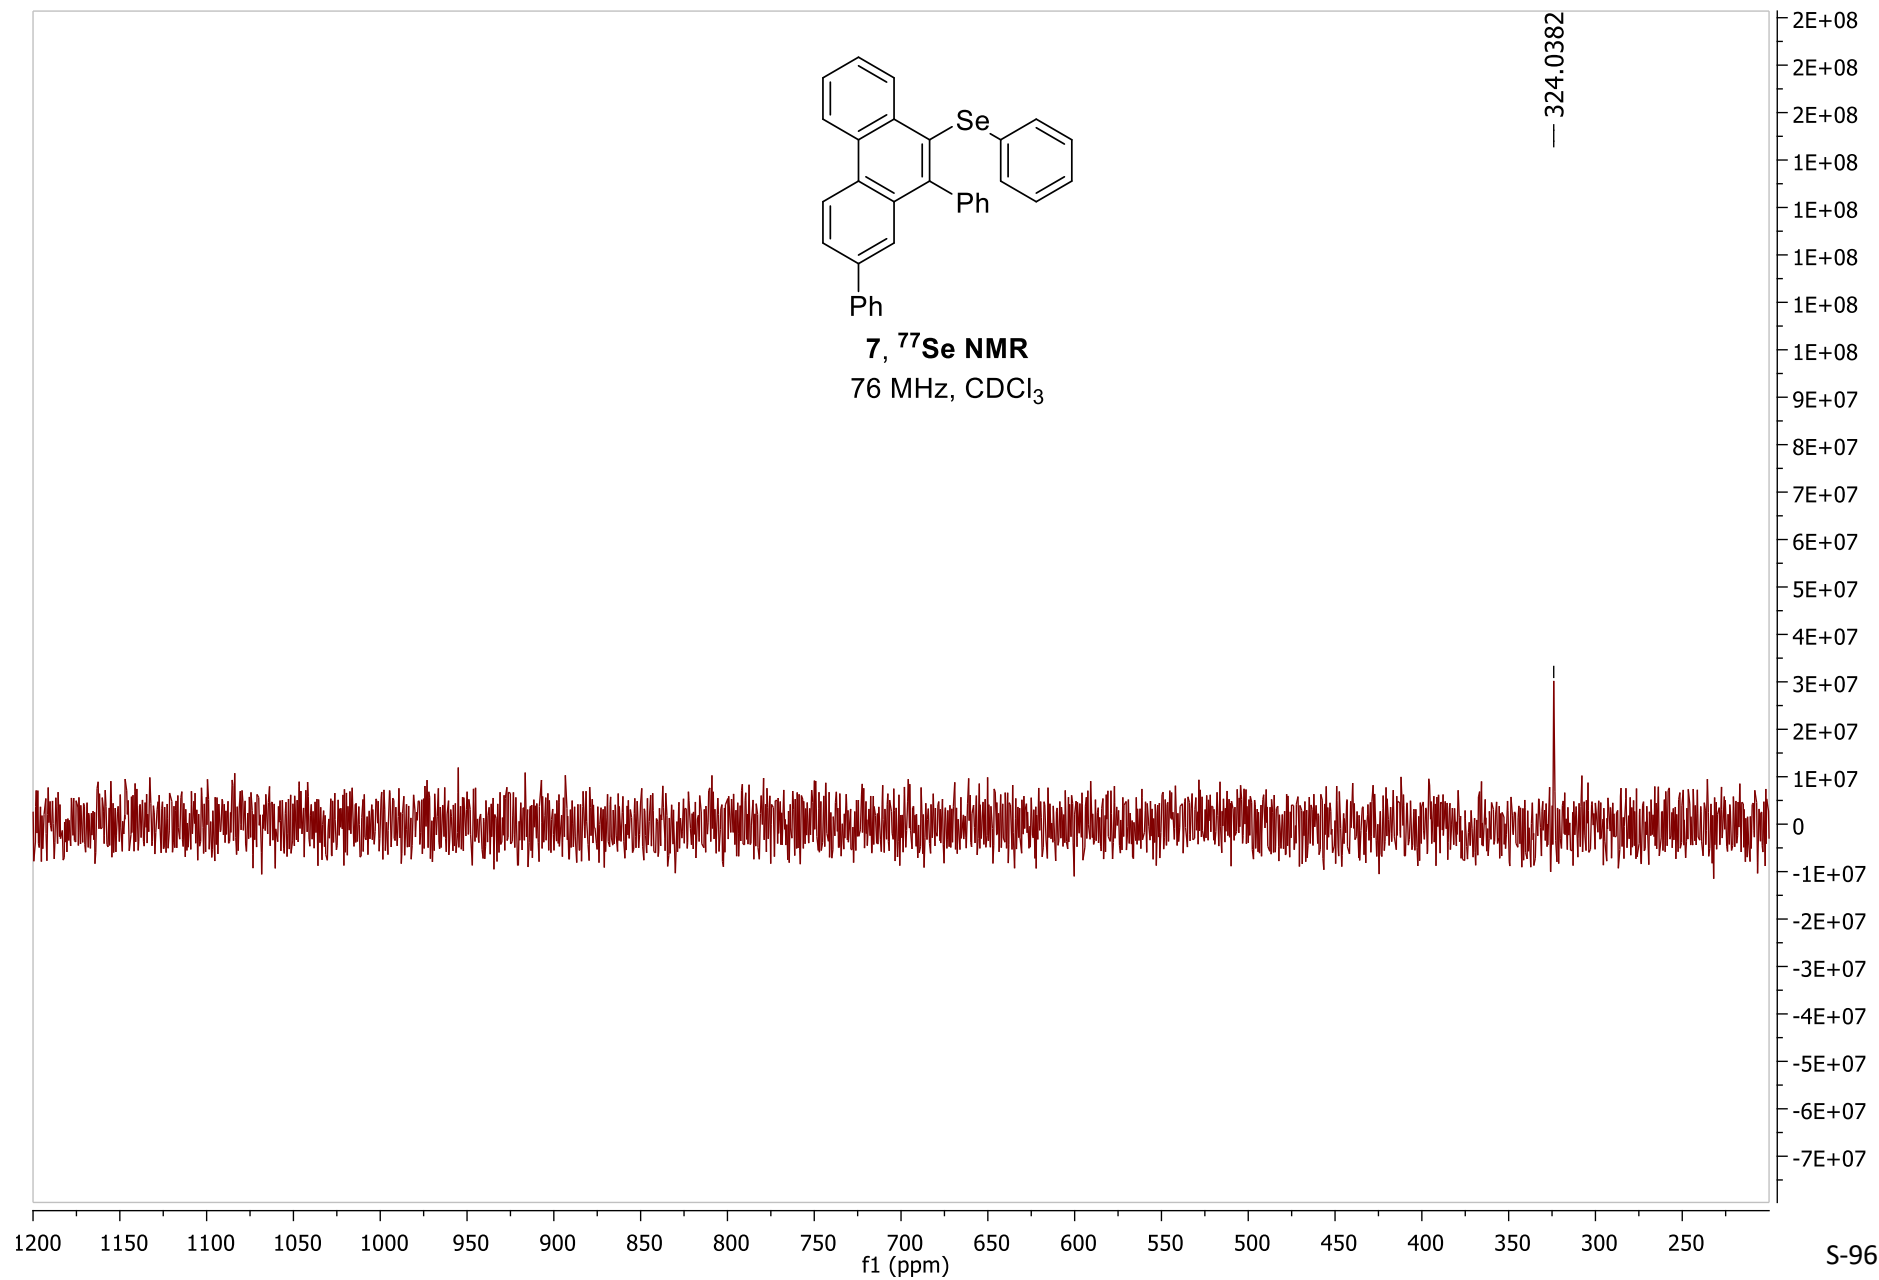

**14. Table S4. Cartesian coordinates for various intermediates and transition states.**

**Radical pathway:**

**A:**

|   |            |             |             |
|---|------------|-------------|-------------|
| C | 4.48255900 | -2.73744300 | 0.87458600  |
| C | 4.38739100 | -1.41710000 | 0.41435600  |
| C | 3.24733100 | -0.63019800 | 0.66647100  |
| C | 2.17519900 | -1.21155100 | 1.39671200  |
| C | 2.27641100 | -2.54299600 | 1.85645600  |
| C | 3.42303100 | -3.30296000 | 1.60269200  |
| H | 5.37642100 | -3.31687800 | 0.67087800  |
| H | 5.21784200 | -0.97931500 | -0.13101500 |
| H | 1.44428700 | -2.97213900 | 2.40476400  |
| H | 3.48927600 | -4.32329800 | 1.96342400  |
| C | 3.20865200 | 0.76854300  | 0.15024100  |
| C | 3.65443900 | 1.04118700  | -1.16028100 |
| C | 2.79455800 | 1.84537900  | 0.96108900  |
| C | 3.69324100 | 2.35685900  | -1.64683200 |
| H | 3.95971100 | 0.22000300  | -1.80263200 |
| C | 2.83050500 | 3.16115100  | 0.47529200  |
| H | 2.47051500 | 1.65778600  | 1.97987900  |
| C | 3.28271700 | 3.42305900  | -0.82896900 |
| H | 4.03728400 | 2.54691100  | -2.65797000 |

|   |             |             |             |
|---|-------------|-------------|-------------|
| H | 2.51671000  | 3.97916000  | 1.11554900  |
| H | 3.31378500  | 4.44120900  | -1.20219400 |
| C | 0.95251100  | -0.49270900 | 1.63179700  |
| C | -0.09558100 | 0.11248600  | 1.81398000  |
| C | -1.28906000 | 0.89032400  | 1.98179200  |
| C | -1.21494900 | 2.29802800  | 1.89010100  |
| C | -2.53552800 | 0.27066200  | 2.21918000  |
| C | -2.37040600 | 3.07249300  | 2.04007300  |
| H | -0.25567000 | 2.76901800  | 1.69535100  |
| C | -3.68943800 | 1.05219400  | 2.36126200  |
| H | -2.59019200 | -0.81140600 | 2.28395800  |
| C | -3.61025400 | 2.45308700  | 2.27391500  |
| H | -2.30807400 | 4.15302300  | 1.96366000  |
| H | -4.64620100 | 0.57331200  | 2.54002000  |
| H | -4.50609000 | 3.05508900  | 2.38401900  |
| C | -0.62674800 | 3.43237500  | -1.45682100 |
| C | -2.02381700 | 3.53773300  | -1.34034700 |
| C | -2.81623600 | 2.37964400  | -1.23285300 |
| C | -2.22026700 | 1.11368700  | -1.24443700 |
| C | -0.81759000 | 1.00847100  | -1.37629100 |
| C | -0.01880200 | 2.17122700  | -1.47648200 |
| H | -0.01229700 | 4.32349700  | -1.52911900 |
| H | -2.49307300 | 4.51578800  | -1.32495200 |

|    |             |             |             |
|----|-------------|-------------|-------------|
| H  | -3.89260900 | 2.46398500  | -1.13114400 |
| H  | -2.82926800 | 0.21962700  | -1.15266800 |
| H  | 1.06111600  | 2.08696700  | -1.56773300 |
| Se | 0.07542700  | -0.68182300 | -1.43632800 |
| I  | -2.15843800 | -2.74985200 | -0.65560400 |

**TSa:**

|   |             |             |             |
|---|-------------|-------------|-------------|
| C | -3.93178900 | 3.27782800  | 1.24237500  |
| C | -4.12253200 | 1.96982900  | 0.77194000  |
| C | -3.05002100 | 1.06400300  | 0.68862600  |
| C | -1.76092900 | 1.50615700  | 1.07478100  |
| C | -1.56982300 | 2.81720100  | 1.54819400  |
| C | -2.65423500 | 3.70090600  | 1.64181200  |
| H | -4.77427200 | 3.95832400  | 1.30158700  |
| H | -5.11504200 | 1.63799400  | 0.48249500  |
| H | -0.57177800 | 3.13758300  | 1.82951300  |
| H | -2.50232600 | 4.70835700  | 2.01283500  |
| C | -3.29337700 | -0.32963700 | 0.21711200  |
| C | -3.97274300 | -0.56175100 | -0.99485200 |
| C | -2.89438600 | -1.43376800 | 0.99846200  |
| C | -4.24228300 | -1.87173100 | -1.42293700 |
| H | -4.27879600 | 0.28325000  | -1.60542600 |
| C | -3.16894500 | -2.74217500 | 0.57528900  |

|   |             |             |             |
|---|-------------|-------------|-------------|
| H | -2.39500300 | -1.26551700 | 1.94800900  |
| C | -3.84134500 | -2.96611500 | -0.63844700 |
| H | -4.75980400 | -2.03594300 | -2.36204600 |
| H | -2.86554800 | -3.58289200 | 1.19083300  |
| H | -4.05205900 | -3.97855900 | -0.96645600 |
| C | -0.58524900 | 0.63886700  | 0.88186200  |
| C | 0.22484000  | -0.10278300 | 1.52657500  |
| C | 1.22526600  | -1.02576200 | 1.88909800  |
| C | 0.96425900  | -2.42066600 | 1.77745800  |
| C | 2.49532500  | -0.58531200 | 2.35392700  |
| C | 1.95528300  | -3.34369500 | 2.11305600  |
| H | -0.00274100 | -2.75198800 | 1.40960700  |
| C | 3.47774100  | -1.52163500 | 2.68368100  |
| H | 2.69106000  | 0.47868400  | 2.43662000  |
| C | 3.21404200  | -2.90048400 | 2.56457200  |
| H | 1.75664600  | -4.40543400 | 2.01610000  |
| H | 4.44784100  | -1.18463100 | 3.03175500  |
| H | 3.98212800  | -3.62206700 | 2.82132100  |
| C | -0.00869500 | -3.44798100 | -1.61800300 |
| C | 1.35893000  | -3.77044100 | -1.59064100 |
| C | 2.32035700  | -2.75075400 | -1.49837900 |
| C | 1.92221100  | -1.40610400 | -1.41951200 |
| C | 0.55331600  | -1.09399500 | -1.44352400 |

|    |             |             |             |
|----|-------------|-------------|-------------|
| C  | -0.41665100 | -2.10768100 | -1.54845100 |
| H  | -0.75697900 | -4.23047000 | -1.69167900 |
| H  | 1.67296900  | -4.80775200 | -1.64129900 |
| H  | 3.37653300  | -2.99735200 | -1.47716500 |
| H  | 2.66478500  | -0.61905200 | -1.33217200 |
| H  | -1.47445700 | -1.85804700 | -1.57151100 |
| Se | -0.09542900 | 0.73638500  | -1.29312000 |
| I  | 2.54735900  | 2.38763200  | -0.71908100 |

**B:**

|   |            |             |             |
|---|------------|-------------|-------------|
| C | 3.88270800 | -3.30203800 | 1.30220200  |
| C | 4.09631900 | -2.00673200 | 0.80654700  |
| C | 3.03210200 | -1.09700800 | 0.67252700  |
| C | 1.72930000 | -1.52065900 | 1.03068900  |
| C | 1.51670100 | -2.81695200 | 1.53242200  |
| C | 2.59191700 | -3.70598000 | 1.67765600  |
| H | 4.71778900 | -3.98716300 | 1.40064800  |
| H | 5.09878800 | -1.68763000 | 0.53748100  |
| H | 0.50872200 | -3.12337400 | 1.79437900  |
| H | 2.42286600 | -4.70300500 | 2.06924200  |
| C | 3.29807700 | 0.28848800  | 0.18751600  |
| C | 3.97969200 | 0.50269500  | -1.02602800 |
| C | 2.91703900 | 1.40304500  | 0.96315700  |

|   |             |             |             |
|---|-------------|-------------|-------------|
| C | 4.26909500  | 1.80620200  | -1.46168500 |
| H | 4.27255300  | -0.35063000 | -1.63148900 |
| C | 3.21319300  | 2.70467300  | 0.53370200  |
| H | 2.41355900  | 1.24619700  | 1.91266200  |
| C | 3.88771800  | 2.91106600  | -0.68207100 |
| H | 4.78777800  | 1.95731300  | -2.40237200 |
| H | 2.92355700  | 3.55342600  | 1.14488200  |
| H | 4.11473500  | 3.91811000  | -1.01570200 |
| C | 0.55874000  | -0.64380000 | 0.77189000  |
| C | -0.19841200 | 0.08302900  | 1.52997900  |
| C | -1.19174600 | 1.00696300  | 1.90393200  |
| C | -0.92112800 | 2.40432900  | 1.82335400  |
| C | -2.46541800 | 0.56956000  | 2.36768900  |
| C | -1.90398600 | 3.32757700  | 2.18059600  |
| H | 0.04775700  | 2.73649500  | 1.46136100  |
| C | -3.43870400 | 1.50730200  | 2.71912700  |
| H | -2.67049800 | -0.49406300 | 2.43111600  |
| C | -3.16577700 | 2.88666800  | 2.62731500  |
| H | -1.69627100 | 4.38947100  | 2.10512900  |
| H | -4.41016900 | 1.17029700  | 3.06389300  |
| H | -3.92701100 | 3.60893100  | 2.90185100  |
| C | 0.00043600  | 3.48185100  | -1.61071000 |
| C | -1.36712000 | 3.80330100  | -1.57672100 |

|    |             |             |             |
|----|-------------|-------------|-------------|
| C  | -2.32787600 | 2.78420700  | -1.47258300 |
| C  | -1.92850800 | 1.44012300  | -1.38661300 |
| C  | -0.56035900 | 1.13186600  | -1.41525500 |
| C  | 0.40974300  | 2.14197600  | -1.53538900 |
| H  | 0.74759000  | 4.26416400  | -1.69557300 |
| H  | -1.68198900 | 4.84006300  | -1.63252700 |
| H  | -3.38396400 | 3.03051900  | -1.44763300 |
| H  | -2.66982000 | 0.65302400  | -1.28983000 |
| H  | 1.46735800  | 1.89237500  | -1.56625600 |
| Se | 0.09375700  | -0.70078600 | -1.25604800 |
| I  | -2.56138700 | -2.37053400 | -0.75877500 |

**B':**

|   |             |             |            |
|---|-------------|-------------|------------|
| C | -4.44609100 | -1.18843900 | 2.71254200 |
| C | -4.33288300 | -0.24380100 | 1.68250300 |
| C | -3.08910700 | 0.05420800  | 1.09468300 |
| C | -1.93069000 | -0.60210200 | 1.58489000 |
| C | -2.05323300 | -1.55958700 | 2.61052800 |
| C | -3.30158100 | -1.85753800 | 3.17177700 |
| H | -5.41715900 | -1.40462000 | 3.14463100 |
| H | -5.22104200 | 0.25692200  | 1.30888100 |
| H | -1.16271000 | -2.05055600 | 2.99182500 |

|   |             |             |             |
|---|-------------|-------------|-------------|
| H | -3.37777600 | -2.59296900 | 3.96501600  |
| C | -3.04640400 | 1.02267700  | -0.04004000 |
| C | -3.59144400 | 2.31273800  | 0.09747100  |
| C | -2.51310400 | 0.63479200  | -1.28535600 |
| C | -3.59043900 | 3.20557400  | -0.98724300 |
| H | -4.00245000 | 2.62208400  | 1.05453300  |
| C | -2.52088000 | 1.51995800  | -2.37157500 |
| H | -2.09692500 | -0.36238800 | -1.40420100 |
| C | -3.05707800 | 2.81205500  | -2.22507000 |
| H | -4.00495300 | 4.20092000  | -0.86556600 |
| H | -2.11194800 | 1.20302700  | -3.32605600 |
| H | -3.06050900 | 3.49973500  | -3.06421600 |
| C | -0.57631700 | -0.22390900 | 1.09503200  |
| C | -0.09363200 | 0.96624700  | 0.87547100  |
| C | 0.76827600  | 2.01540700  | 0.51719400  |
| C | 1.67199200  | 2.57335700  | 1.46846900  |
| C | 0.73917800  | 2.54352400  | -0.80737900 |
| C | 2.52906900  | 3.60856200  | 1.09274400  |
| H | 1.69572500  | 2.17288600  | 2.47691800  |
| C | 1.60326700  | 3.58009000  | -1.16505600 |
| H | 0.04184200  | 2.12614200  | -1.52762400 |
| C | 2.50245700  | 4.11649300  | -0.22148700 |
| H | 3.22358300  | 4.01991700  | 1.81746900  |

|    |            |             |             |
|----|------------|-------------|-------------|
| H  | 1.58099200 | 3.97325900  | -2.17567000 |
| H  | 3.17126400 | 4.92148300  | -0.50601500 |
| C  | 4.06379300 | -0.13817700 | 2.47535900  |
| C  | 4.75373900 | 0.43737100  | 1.39539700  |
| C  | 4.23676300 | 0.33377100  | 0.09420700  |
| C  | 3.02552200 | -0.33991900 | -0.13403500 |
| C  | 2.34359500 | -0.90916200 | 0.95118200  |
| C  | 2.85478600 | -0.81722300 | 2.25704200  |
| H  | 4.46103100 | -0.06130700 | 3.48144900  |
| H  | 5.68709400 | 0.96267200  | 1.56757100  |
| H  | 4.76555200 | 0.78017300  | -0.74096000 |
| H  | 2.62008100 | -0.40953500 | -1.13841700 |
| H  | 2.32124300 | -1.26100800 | 3.09179100  |
| Se | 0.63460800 | -1.82935400 | 0.71920000  |
| I  | 0.40779400 | -1.95359700 | -2.45735200 |

**TS<sub>b</sub>:**

|   |             |             |            |
|---|-------------|-------------|------------|
| C | -4.13440200 | -3.49134700 | 0.64988900 |
| C | -4.38328300 | -2.17084700 | 0.25311300 |
| C | -3.32582400 | -1.27175100 | 0.02709200 |
| C | -1.98668500 | -1.69679600 | 0.24844700 |
| C | -1.75005700 | -3.03073000 | 0.63243700 |
| C | -2.81026600 | -3.92635900 | 0.82183500 |

|   |             |             |             |
|---|-------------|-------------|-------------|
| H | -4.95957100 | -4.17642800 | 0.81002900  |
| H | -5.40244200 | -1.83312900 | 0.09029400  |
| H | -0.73394200 | -3.38686200 | 0.78144300  |
| H | -2.60443900 | -4.95194300 | 1.10760600  |
| C | -3.57868100 | 0.10961700  | -0.43381500 |
| C | -4.48013300 | 0.96298500  | 0.21282100  |
| C | -2.77780600 | 0.60091300  | -1.51568100 |
| C | -4.62662100 | 2.29757900  | -0.20964800 |
| H | -5.05312900 | 0.59359100  | 1.05860600  |
| C | -2.97859600 | 1.94043100  | -1.96662800 |
| H | -2.34745000 | -0.11867700 | -2.21034500 |
| C | -3.87088200 | 2.78097500  | -1.30024500 |
| H | -5.32330400 | 2.95354900  | 0.30121800  |
| H | -2.42398900 | 2.29941500  | -2.82744800 |
| H | -4.00061100 | 3.80540100  | -1.63360400 |
| C | -0.87768100 | -0.70858300 | 0.15125000  |
| C | -0.87401900 | 0.40678000  | -0.57014700 |
| C | 0.01833000  | 1.47333800  | -0.95303800 |
| C | -0.20786500 | 2.79658600  | -0.50867900 |
| C | 1.09294300  | 1.21081400  | -1.83541600 |
| C | 0.64860000  | 3.82755300  | -0.90801000 |
| H | -1.03942400 | 2.99777200  | 0.16075600  |
| C | 1.94265500  | 2.25041900  | -2.23587800 |

|               |             |             |             |
|---------------|-------------|-------------|-------------|
| H             | 1.25902600  | 0.19743600  | -2.18848700 |
| C             | 1.72768400  | 3.55933900  | -1.77101200 |
| H             | 0.48030600  | 4.83667000  | -0.54641400 |
| H             | 2.77000100  | 2.04036100  | -2.90579000 |
| H             | 2.38894300  | 4.36222300  | -2.07979500 |
| C             | 0.82477300  | 2.75975500  | 2.98972400  |
| C             | 2.05179000  | 3.26502500  | 2.52852700  |
| C             | 2.87039200  | 2.47924000  | 1.70106400  |
| C             | 2.46677100  | 1.18662200  | 1.32911300  |
| C             | 1.24172100  | 0.69309300  | 1.79788700  |
| C             | 0.41480200  | 1.46694200  | 2.62879900  |
| H             | 0.18979300  | 3.36460500  | 3.62785900  |
| H             | 2.36542700  | 4.26478800  | 2.80938000  |
| H             | 3.81463400  | 2.86945100  | 1.33676700  |
| H             | 3.09109900  | 0.58244800  | 0.67788200  |
| H             | -0.53247900 | 1.07573700  | 2.98727200  |
| Se            | 0.66595400  | -1.12415900 | 1.37346000  |
| I             | 2.83220800  | -2.23420400 | -0.67471400 |
| <br><b>C:</b> |             |             |             |
| C             | -4.07428100 | -3.48476300 | 0.76341100  |
| C             | -4.37967000 | -2.18608700 | 0.34771500  |
| C             | -3.35893500 | -1.24064100 | 0.10256400  |

|   |             |             |             |
|---|-------------|-------------|-------------|
| C | -2.00151400 | -1.61813600 | 0.30960000  |
| C | -1.70893900 | -2.93530100 | 0.71474700  |
| C | -2.73100700 | -3.86560600 | 0.93590700  |
| H | -4.86980600 | -4.20217500 | 0.93258200  |
| H | -5.41459900 | -1.90915800 | 0.17404100  |
| H | -0.68030300 | -3.25373000 | 0.85576000  |
| H | -2.48393400 | -4.87745900 | 1.23719000  |
| C | -3.64721700 | 0.10996300  | -0.37891600 |
| C | -4.85046500 | 0.76216800  | -0.13708300 |
| C | -2.56138000 | 0.75005200  | -1.21816200 |
| C | -5.09641800 | 2.06768000  | -0.60828400 |
| H | -5.61134500 | 0.26847400  | 0.46133400  |
| C | -2.87148800 | 2.17395500  | -1.61389500 |
| H | -2.49717500 | 0.16673200  | -2.16506000 |
| C | -4.07706900 | 2.76175600  | -1.34197300 |
| H | -6.03904100 | 2.55755000  | -0.39240900 |
| H | -2.11731800 | 2.70910000  | -2.18135500 |
| H | -4.26711700 | 3.77580000  | -1.67963200 |
| C | -0.94830300 | -0.58809100 | 0.12910400  |
| C | -1.15964100 | 0.54459400  | -0.59040000 |
| C | -0.09390400 | 1.52160000  | -0.94650400 |
| C | -0.09659500 | 2.83535900  | -0.43894600 |
| C | 0.91651600  | 1.12981500  | -1.84157100 |

|    |             |             |             |
|----|-------------|-------------|-------------|
| C  | 0.91402400  | 3.73330100  | -0.80286100 |
| H  | -0.87391300 | 3.14202900  | 0.25553000  |
| C  | 1.92454300  | 2.03364100  | -2.21525400 |
| H  | 0.91384700  | 0.11959300  | -2.24058200 |
| C  | 1.92752800  | 3.33557100  | -1.69349200 |
| H  | 0.91611100  | 4.73661900  | -0.38965400 |
| H  | 2.70144700  | 1.71855900  | -2.90438300 |
| H  | 2.70963200  | 4.03389000  | -1.97327100 |
| C  | 0.96393600  | 2.71678300  | 3.06095000  |
| C  | 2.18094800  | 3.25715300  | 2.61146700  |
| C  | 2.96028900  | 2.55501500  | 1.67942300  |
| C  | 2.52716100  | 1.31281000  | 1.18801400  |
| C  | 1.31251000  | 0.78653600  | 1.64401500  |
| C  | 0.52524500  | 1.47199900  | 2.58292000  |
| H  | 0.36000900  | 3.25599500  | 3.78262900  |
| H  | 2.51700200  | 4.21892000  | 2.98411800  |
| H  | 3.89583000  | 2.97247600  | 1.32278900  |
| H  | 3.11876700  | 0.77666000  | 0.45231700  |
| H  | -0.41290800 | 1.05247700  | 2.93347100  |
| Se | 0.73610800  | -0.98748200 | 1.05975300  |
| I  | 2.98362000  | -2.02518300 | -0.96135900 |

**TSc:**

|   |             |            |             |
|---|-------------|------------|-------------|
| C | -4.95731600 | 2.96904400 | 0.23383000  |
| C | -4.70576000 | 4.14827200 | -0.45669800 |
| C | -5.73896800 | 5.08255800 | -0.73149500 |
| C | -7.06238700 | 4.79057200 | -0.28790200 |
| C | -7.29734100 | 3.57822700 | 0.41228000  |
| C | -6.26724600 | 2.68186000 | 0.67496300  |
| H | -4.14891100 | 2.27573000 | 0.43747200  |
| H | -3.69069800 | 4.35703400 | -0.77122500 |
| H | -8.29347600 | 3.32831200 | 0.75880500  |
| H | -6.47249000 | 1.76595200 | 1.21754500  |
| C | -5.47076900 | 6.33013400 | -1.43756600 |
| C | -4.21353200 | 6.61487200 | -2.01754600 |
| C | -6.49591900 | 7.34841400 | -1.46585500 |
| C | -3.96769200 | 7.81966400 | -2.66945800 |
| H | -3.41938500 | 5.87889100 | -1.98001400 |
| C | -6.24264100 | 8.54688700 | -2.23621400 |
| H | -6.24877600 | 7.99937300 | 0.04646900  |
| C | -5.00111600 | 8.78600200 | -2.79123600 |
| H | -2.99481500 | 8.00747000 | -3.11020900 |
| H | -7.02924300 | 9.28542200 | -2.32994800 |
| H | -4.81842500 | 9.70674100 | -3.33446800 |
| C | -8.13832800 | 5.74756900 | -0.57424200 |

|   |              |             |             |
|---|--------------|-------------|-------------|
| C | -7.88944700  | 6.98330800  | -1.11125500 |
| C | -8.92881500  | 8.04690000  | -1.24119500 |
| C | -9.41538700  | 8.45529900  | -2.49723400 |
| C | -9.39286100  | 8.68325600  | -0.07809200 |
| C | -10.37772700 | 9.46818300  | -2.58500100 |
| H | -9.05617800  | 7.96509900  | -3.39793800 |
| C | -10.35662000 | 9.70207500  | -0.16559900 |
| H | -9.00997600  | 8.37544000  | 0.89087700  |
| C | -10.85201800 | 10.09408000 | -1.41797100 |
| H | -10.76080500 | 9.76450300  | -3.55586100 |
| H | -10.71467600 | 10.18315300 | 0.73897500  |
| H | -11.59986900 | 10.87735700 | -1.48795500 |
| C | -11.52059500 | 5.85666700  | -3.93583600 |
| C | -12.60388300 | 6.71888200  | -3.69309500 |
| C | -12.88615000 | 7.14198000  | -2.38512800 |
| C | -12.08526400 | 6.71348800  | -1.31371500 |
| C | -11.00952600 | 5.85455900  | -1.57118100 |
| C | -10.72070500 | 5.41313800  | -2.87221100 |
| H | -11.30084400 | 5.52588500  | -4.94511000 |
| H | -13.22105800 | 7.05787800  | -4.51830000 |
| H | -13.71639700 | 7.81356600  | -2.19499000 |
| H | -12.28927400 | 7.06046100  | -0.30494200 |
| H | -9.88730200  | 4.74263700  | -3.05874900 |

|    |              |            |             |
|----|--------------|------------|-------------|
| Se | -9.94588900  | 5.14941700 | -0.09343900 |
| I  | -11.05630400 | 6.48391900 | 2.58370700  |

**D (3aa):**

|   |             |             |             |
|---|-------------|-------------|-------------|
| C | -4.42392200 | -2.83665300 | 1.31273600  |
| C | -4.56981800 | -1.63938600 | 0.62618500  |
| C | -3.45175200 | -0.81986200 | 0.31487500  |
| C | -2.15409000 | -1.24442600 | 0.72769500  |
| C | -2.02957200 | -2.47365100 | 1.43501300  |
| C | -3.13814200 | -3.25834800 | 1.72097700  |
| H | -5.29361500 | -3.44358300 | 1.53861800  |
| H | -5.56456800 | -1.33560600 | 0.32638800  |
| H | -1.05773100 | -2.81152900 | 1.77374200  |
| H | -3.01677800 | -4.19031900 | 2.26158000  |
| C | -3.60431900 | 0.43868600  | -0.40974000 |
| C | -4.87354100 | 0.90171600  | -0.84954300 |
| C | -2.45456400 | 1.22635800  | -0.69765500 |
| C | -5.00278200 | 2.09065700  | -1.55556100 |
| H | -5.76768300 | 0.32830600  | -0.64071600 |
| C | -2.60656900 | 2.43455600  | -1.43685300 |
| H | -1.41588300 | -1.44866000 | -2.19155500 |
| C | -3.85657800 | 2.86326700  | -1.85887600 |
| H | -5.98243500 | 2.42315900  | -1.88073600 |

|   |             |             |             |
|---|-------------|-------------|-------------|
| H | -1.72942000 | 3.02294200  | -1.67788000 |
| H | -3.95534500 | 3.78536900  | -2.42078500 |
| C | -1.00152100 | -0.40330400 | 0.41291500  |
| C | -1.13080200 | 0.78305300  | -0.27396200 |
| C | 0.03917400  | 1.62510200  | -0.67040400 |
| C | 0.28494100  | 2.85835200  | -0.03818000 |
| C | 0.87428600  | 1.20571100  | -1.71742900 |
| C | 1.37404200  | 3.64720100  | -0.42892200 |
| H | -0.36477800 | 3.18588300  | 0.76889900  |
| C | 1.96648800  | 1.99675500  | -2.11172700 |
| H | 0.67643200  | 0.26201200  | -2.21754700 |
| C | 2.22049700  | 3.21599000  | -1.46605000 |
| H | 1.56642900  | 4.58831500  | 0.07556000  |
| H | 2.61185000  | 1.65893000  | -2.91622700 |
| H | 3.06733600  | 3.82516500  | -1.76519600 |
| C | 1.58300500  | 2.26211000  | 3.34661400  |
| C | 2.81754600  | 2.71885200  | 2.85294300  |
| C | 3.43365300  | 2.05733800  | 1.77946400  |
| C | 2.81931700  | 0.94106700  | 1.18763000  |
| C | 1.59020700  | 0.49764600  | 1.69112100  |
| C | 0.96568200  | 1.14210100  | 2.77095900  |
| H | 1.10416300  | 2.77000400  | 4.17676300  |
| H | 3.29271000  | 3.58495000  | 3.30097200  |

|    |            |             |             |
|----|------------|-------------|-------------|
| H  | 4.38131000 | 2.41361500  | 1.38999200  |
| H  | 3.28253800 | 0.44617000  | 0.33879700  |
| H  | 0.01380300 | 0.78576300  | 3.15325900  |
| Se | 0.74586400 | -1.10725200 | 0.96653100  |
| I  | 2.54277600 | -2.18093700 | -1.43851600 |

**Polar Pathway:**

**Reactant Polar:**

|   |             |            |             |
|---|-------------|------------|-------------|
| C | -2.87796200 | 1.27964200 | -1.02176200 |
| C | -1.65539700 | 1.77280100 | -1.50152400 |
| C | -0.92472900 | 2.73766400 | -0.78498800 |
| C | -1.45789500 | 3.22622400 | 0.43805500  |
| C | -2.68740100 | 2.72466300 | 0.91572100  |
| C | -3.39422100 | 1.75484200 | 0.19491900  |
| H | -3.41911200 | 0.52986500 | -1.58872100 |
| H | -1.25247100 | 1.39536000 | -2.43684400 |
| H | -3.08637100 | 3.11622100 | 1.84574900  |
| H | -4.33817200 | 1.37796000 | 0.57319800  |
| C | 0.35797400  | 3.25292500 | -1.33839500 |
| C | 0.42302700  | 3.68142100 | -2.67975800 |
| C | 1.52057100  | 3.32340300 | -0.54512900 |
| C | 1.61874800  | 4.18845300 | -3.21198000 |
| H | -0.46849800 | 3.63447600 | -3.29918400 |

|   |             |            |             |
|---|-------------|------------|-------------|
| C | 2.71776200  | 3.82735700 | -1.07563000 |
| H | 1.48926100  | 2.97861400 | 0.48381400  |
| C | 2.76900500  | 4.26842600 | -2.40916300 |
| H | 1.65008000  | 4.52473900 | -4.24302700 |
| H | 3.60533700  | 3.87212700 | -0.45289100 |
| H | 3.69331800  | 4.66341000 | -2.81763600 |
| C | -0.80262400 | 4.27609800 | 1.17209800  |
| C | -0.25626100 | 5.19620700 | 1.76185400  |
| C | 0.41406200  | 6.29978000 | 2.39597100  |
| C | 1.80821900  | 6.25363700 | 2.61054800  |
| C | -0.30909600 | 7.45215500 | 2.77238100  |
| C | 2.46731500  | 7.34424900 | 3.19320400  |
| H | 2.36431800  | 5.36940600 | 2.31359700  |
| C | 0.35492000  | 8.54049900 | 3.35452200  |
| H | -1.37997200 | 7.48837000 | 2.59620300  |
| C | 1.74395800  | 8.49047800 | 3.56604100  |
| H | 3.53941700  | 7.30354100 | 3.35343400  |
| H | -0.20599200 | 9.42446500 | 3.63899700  |
| H | 2.25618700  | 9.33417400 | 4.01632600  |
| C | 1.66945300  | 7.85016600 | -0.57988400 |
| C | 1.43482900  | 9.23274200 | -0.63084700 |
| C | 0.16278300  | 9.72042800 | -0.98561900 |
| C | -0.86960500 | 8.82607400 | -1.30065500 |

|    |             |             |             |
|----|-------------|-------------|-------------|
| C  | -0.63244000 | 7.43933700  | -1.23277200 |
| C  | 0.63285300  | 6.94717200  | -0.86873000 |
| H  | 2.64586200  | 7.46878900  | -0.29907600 |
| H  | 2.23362200  | 9.92763200  | -0.39361300 |
| H  | -0.01979100 | 10.78869500 | -1.02634800 |
| H  | -1.84607600 | 9.20112200  | -1.59186800 |
| H  | 0.80555200  | 5.87717600  | -0.79920700 |
| Se | -2.01654300 | 6.16931700  | -1.74122600 |
| I  | -3.74908000 | 6.55316900  | 0.28095200  |

**TS Polar:**

|   |             |            |             |
|---|-------------|------------|-------------|
| C | -2.73612700 | 1.11165900 | -0.99243900 |
| C | -1.51897600 | 1.62658900 | -1.46475700 |
| C | -0.92980400 | 2.75829800 | -0.87687100 |
| C | -1.61286500 | 3.39116200 | 0.19882400  |
| C | -2.83253000 | 2.86157900 | 0.67989900  |
| C | -3.39008500 | 1.72331100 | 0.09008500  |
| H | -3.16410000 | 0.23104000 | -1.45884700 |
| H | -1.00660500 | 1.12950100 | -2.28241400 |
| H | -3.33291100 | 3.36462800 | 1.49980700  |
| H | -4.32379200 | 1.31960200 | 0.46455100  |
| C | 0.37900200  | 3.25305700 | -1.38215600 |
| C | 0.58884500  | 3.40343800 | -2.76759700 |

|   |             |            |             |
|---|-------------|------------|-------------|
| C | 1.43777800  | 3.53993600 | -0.49598500 |
| C | 1.82761300  | 3.84656700 | -3.25752700 |
| H | -0.22213900 | 3.19244200 | -3.45857900 |
| C | 2.67633100  | 3.97855300 | -0.98482300 |
| H | 1.30154100  | 3.39431700 | 0.57134800  |
| C | 2.87421900  | 4.13753600 | -2.36729400 |
| H | 1.97249000  | 3.96724700 | -4.32568100 |
| H | 3.48428700  | 4.18909400 | -0.29189400 |
| H | 3.83285200  | 4.47746300 | -2.74493400 |
| C | -1.12300000 | 4.59754000 | 0.79108300  |
| C | -0.70941200 | 5.57390100 | 1.42757100  |
| C | -0.07898900 | 6.61609200 | 2.16903200  |
| C | 1.29859100  | 6.86355900 | 1.96426000  |
| C | -0.81704600 | 7.40967000 | 3.07626300  |
| C | 1.93032200  | 7.89530900 | 2.66648400  |
| H | 1.85349300  | 6.25004400 | 1.26011900  |
| C | -0.17711200 | 8.44324700 | 3.76827800  |
| H | -1.87519000 | 7.20962800 | 3.21581500  |
| C | 1.19465000  | 8.68677400 | 3.56584000  |
| H | 2.98586400  | 8.08713400 | 2.50975200  |
| H | -0.73962300 | 9.05676300 | 4.46308600  |
| H | 1.68592800  | 9.48866400 | 4.10661100  |
| C | 2.04508200  | 7.58268000 | -1.57078500 |

|    |             |             |             |
|----|-------------|-------------|-------------|
| C  | 2.17716500  | 8.89104700  | -1.06570300 |
| C  | 1.09085800  | 9.52615000  | -0.43880000 |
| C  | -0.13251200 | 8.85510700  | -0.31724300 |
| C  | -0.27584700 | 7.54516400  | -0.83869000 |
| C  | 0.82704200  | 6.90489500  | -1.45134100 |
| H  | 2.88672700  | 7.09405100  | -2.04977200 |
| H  | 3.12561500  | 9.41000300  | -1.15723700 |
| H  | 1.19815800  | 10.52960300 | -0.04306700 |
| H  | -0.97638300 | 9.33527300  | 0.16851000  |
| H  | 0.72339400  | 5.89372700  | -1.83379200 |
| Se | -2.00820300 | 6.74077200  | -0.78825000 |
| I  | -4.40097100 | 6.22235800  | 1.50766800  |

**Product Polar:**

|   |             |            |             |
|---|-------------|------------|-------------|
| C | -2.42397700 | 1.37966700 | -0.91762400 |
| C | -1.16539700 | 1.89583500 | -1.25556500 |
| C | -0.74804100 | 3.16214400 | -0.80688300 |
| C | -1.65207500 | 3.90393300 | -0.00121600 |
| C | -2.92220400 | 3.38629100 | 0.34024500  |
| C | -3.30529000 | 2.12164600 | -0.11246100 |
| H | -2.71338900 | 0.39767800 | -1.27516400 |
| H | -0.48586400 | 1.30023500 | -1.85642000 |
| H | -3.59048700 | 3.99254900 | 0.94652700  |

|   |             |            |             |
|---|-------------|------------|-------------|
| H | -4.27595100 | 1.71979100 | 0.15345800  |
| C | 0.60300100  | 3.66603900 | -1.17556600 |
| C | 1.07240200  | 3.50088400 | -2.49418000 |
| C | 1.44641300  | 4.27303900 | -0.22331700 |
| C | 2.34921900  | 3.94843700 | -2.85830500 |
| H | 0.42823100  | 3.04417800 | -3.24007400 |
| C | 2.72230800  | 4.72688600 | -0.58897600 |
| H | 1.13004000  | 4.34712000 | 0.81333800  |
| C | 3.17567600  | 4.57054400 | -1.90869500 |
| H | 2.69334800  | 3.82317100 | -3.87939000 |
| H | 3.36567000  | 5.18503800 | 0.15555000  |
| H | 4.16106100  | 4.92512100 | -2.19194200 |
| C | -1.34844900 | 5.22979900 | 0.47274000  |
| C | -1.00163000 | 6.17823800 | 1.25738400  |
| C | -0.36347800 | 6.74698700 | 2.42584300  |
| C | 1.01382400  | 7.04892900 | 2.37404500  |
| C | -1.11738200 | 6.99963400 | 3.58894800  |
| C | 1.63896000  | 7.59121800 | 3.50313200  |
| H | 1.57871800  | 6.85821200 | 1.46556400  |
| C | -0.47927000 | 7.54042300 | 4.71188800  |
| H | -2.17979800 | 6.77368900 | 3.59372300  |
| C | 0.89485300  | 7.83569000 | 4.67013800  |
| H | 2.69765400  | 7.82229700 | 3.47451100  |

|    |             |            |             |
|----|-------------|------------|-------------|
| H  | -1.04838000 | 7.73327400 | 5.61427700  |
| H  | 1.38263400  | 8.25658200 | 5.54253100  |
| C  | 1.25984400  | 7.14589800 | -3.23598700 |
| C  | 2.11453200  | 8.15586900 | -2.76333800 |
| C  | 1.80729500  | 8.84835600 | -1.58093300 |
| C  | 0.63830600  | 8.53662600 | -0.86759800 |
| C  | -0.20701500 | 7.52361400 | -1.35114000 |
| C  | 0.09116400  | 6.82327500 | -2.53030600 |
| H  | 1.50016200  | 6.60923700 | -4.14680600 |
| H  | 3.01591200  | 8.40118500 | -3.31444100 |
| H  | 2.46623500  | 9.62832500 | -1.21653800 |
| H  | 0.39195100  | 9.08199000 | 0.03897200  |
| H  | -0.56862200 | 6.04187700 | -2.89497400 |
| Se | -1.86988200 | 7.15896200 | -0.38602500 |
| I  | -4.78920400 | 6.67576200 | 1.87946000  |
